# Supplementary material
Source: PubMed Central journal article supplement (PMC4847725)
Supplement: NIHMS744867-supplement-10974_2015_9434_MOESM6_ESM.pdf [file NIHMS744867-supplement-10974_2015_9434_MOESM6_ESM.pdf]

| Proteins                                                                                  | Accession Number | Molecular Weight | Mann Whitney Test (Bonferroni Corrected ) | Average Coefficient of Variance | Δ43 Average | A57G Average | Δ43/A57G    | A57G/Δ43    |
|-------------------------------------------------------------------------------------------|------------------|------------------|-------------------------------------------|---------------------------------|-------------|--------------|-------------|-------------|
| Elongation factor 2 OS=Mus musculus GN=Eef2 PE=1 SV=2                                     | EF2_MOUSE        | 95 kDa           | < 0.0001                                  | 20.842738                       | 0.9183      | 1.06286667   | 0.863984194 | 1.157428582 |
| Complement C3 OS=Mus musculus GN=C3 PE=1 SV=3                                             | CO3_MOUSE        | 186 kDa          | < 0.0001                                  | 21.553332                       | 0.958566667 | 1.10473333   | 0.867690544 | 1.152484612 |
| Aldehyde dehydrogenase, mitochondrial OS=Mus musculus GN=Aldh2 PEALDH2_MOUSE              |                  | 57 kDa           | < 0.0001                                  | 23.078518                       | 0.843066667 | 1.2276       | 0.686760074 | 1.456112605 |
| Heat shock protein HSP 90-beta OS=Mus musculus GN=Hsp90ab1 PE=1 SHS90B_MOUSE              |                  | 83 kDa           | < 0.0001                                  | 22.325896                       | 0.931566667 | 1.0626       | 0.876686116 | 1.140659105 |
| Leucine-rich PPR motif-containing protein, mitochondrial OS=Mus musculus PPRC_MOUSE       |                  | 157 kDa          | < 0.0001                                  | 21.971369                       | 0.839733333 | 0.9806       | 0.856346455 | 1.167751667 |
| NAD(P) transhydrogenase, mitochondrial OS=Mus musculus GN=Nnt PE=NNTM_MOUSE               |                  | 114 kDa          | < 0.0001                                  | 26.87348                        | 0.8075      | 1.18143333   | 0.683491804 | 1.463075335 |
| Delta-1-pyrroline-5-carboxylate dehydrogenase, mitochondrial OS=Mus AL4A1_MOUSE           |                  | 62 kDa           | < 0.0001                                  | 21.019696                       | 0.690833333 | 0.8632       | 0.800316651 | 1.249505428 |
| Stress-induced-phosphoprotein 1 OS=Mus musculus GN=Stip1 PE=1 SV=1 STIP1_MOUSE            |                  | 63 kDa           | < 0.0001                                  | 19.943316                       | 0.8862      | 1.0147       | 0.873361585 | 1.145001128 |
| Cluster of Troponin T, cardiac muscle OS=Mus musculus GN=Tnnt2 PE=4 K3W4R6_MOUSE [3]      |                  | 35 kDa           | 0.00018                                   | 26.36347                        | 0.9561      | 0.84206667   | 1.13542079  | 0.880730746 |
| Mitochondrial 2-oxoglutarate/malate carrier protein OS=Mus musculus M2OM_MOUSE            |                  | 34 kDa           | 0.0017                                    | 22.087899                       | 1.047033333 | 1.35216667   | 0.774337483 | 1.29142657  |
| Alpha-1B-glycoprotein OS=Mus musculus GN=A1bg PE=1 SV=1 A1BG_MOUSE                        |                  | 57 kDa           | 0.0018                                    | 22.157027                       | 1.293566667 | 0.92943333   | 1.391779938 | 0.718504394 |
| Elongation factor 1-gamma OS=Mus musculus GN=Eef1g PE=1 SV=3 EF1G_MOUSE                   |                  | 50 kDa           | 0.0025                                    | 20.053983                       | 0.935866667 | 1.0707       | 0.874069923 | 1.14407323  |
| Cluster of Myosin-6 OS=Mus musculus GN=Myh6 PE=1 SV=2 (MYH6_MOUSE) [10]                   |                  | 224 kDa          | 0.0039                                    | 51.96263                        | 0.974866667 | 0.88096667   | 1.106587461 | 0.903679136 |
| Succinyl-CoA ligase [GDP-forming] subunit beta, mitochondrial OS=Mus musculus SUCB2_MOUSE |                  | 47 kDa           | 0.0068                                    | 21.554866                       | 1.041333333 | 1.18976667   | 0.875241644 | 1.142541613 |
| Cluster of Inorganic pyrophosphatase 2, mitochondrial OS=Mus musculus D3Z636_MOUSE [2]    |                  | 38 kDa           | 0.0069                                    | 21.219736                       | 0.954866667 | 1.1961       | 0.798316752 | 1.252635621 |
| Coiled-coil-helix-coiled-coil-helix domain-containing protein 3, mitochondon CHCH3_MOUSE  |                  | 26 kDa           | 0.0083                                    | 25.52083                        | 1.105033333 | 0.9405       | 1.174942407 | 0.851105547 |
| Cluster of Myosin regulatory light chain 2, ventricular/cardiac muscle iso MLRV_MOUSE     |                  | 19 kDa           | 0.011                                     | 36.96808                        | 0.857633333 | 0.79613333   | 1.077248367 | 0.928291033 |
| Histidine rich calcium binding protein, isoform CRA_a OS=Mus musculus G5E8J6_MOUSE        |                  | 85 kDa           | 0.017                                     | 27.835104                       | 0.930766667 | 1.0272       | 0.906120197 | 1.103606346 |
| Clathrin heavy chain 1 OS=Mus musculus GN=Cltc PE=1 SV=3 CLH1_MOUSE                       |                  | 192 kDa          | 0.017                                     | 21.689476                       | 0.930766667 | 0.92543333   | 1.249540756 | 0.800294024 |
| Sarcalumenin OS=Mus musculus GN=Srl PE=1 SV=1 SRCA_MOUSE                                  |                  | 99 kDa           | 0.02                                      | 25.064                          | 1.007733333 | 1.12463333   | 0.896055011 | 1.116002911 |
| Cytochrome c oxidase subunit 5B, mitochondrial OS=Mus musculus GN= COX5B_MOUSE            |                  | 14 kDa           | 0.02                                      | 25.410923                       | 0.9496      | 0.85186667   | 1.11472844  | 0.897079472 |
| Serpin H1 OS=Mus musculus GN=Serpinh1 PE=1 SV=3 SERPH_MOUSE                               |                  | 47 kDa           | 0.021                                     | 20.842558                       | 0.882433333 | 1.01086667   | 0.872947306 | 1.145544517 |
| Calcium-binding mitochondrial carrier protein Aralar1 OS=Mus musculus CMC1_MOUSE          |                  | 75 kDa           | 0.024                                     | 20.755787                       | 1.032033333 | 1.15716667   | 0.891862307 | 1.121249314 |
| Short-chain specific acyl-CoA dehydrogenase, mitochondrial OS=Mus musculus ACADS_MOUSE    |                  | 45 kDa           | 0.031                                     | 23.044616                       | 0.988366667 | 1.13993333   | 0.867039008 | 1.153350646 |
| Heterogeneous nuclear ribonucleoprotein U OS=Mus musculus GN=Hnrr G3XA10_MOUSE (+1)       |                  | 87 kDa           | 0.038                                     | 20.39134                        | 0.942833333 | 1.12273333   | 0.839766047 | 1.190807849 |
| Cluster of Long-chain-fatty-acid-CoA ligase 1 OS=Mus musculus GN=Acs ACSL1_MOUSE [4]      |                  | 78 kDa           | 0.039                                     | 24.848925                       | 1.1165      | 1.16303333   | 0.954830759 | 1.047306018 |
| Citrate lyase subunit beta-like protein, mitochondrial OS=Mus musculus CLYBL_MOUSE        |                  | 38 kDa           | 0.042                                     | 21.492629                       | 0.9143      | 1.0197       | 0.896636266 | 1.115279449 |
| Cytochrome b-c1 complex subunit 7 OS=Mus musculus GN=Uqcrc PE=3 Q9CQB4_MOUSE (+1)         |                  | 14 kDa           | 0.046                                     | 22.793165                       | 1.111733333 | 0.96373333   | 1.153569452 | 0.86687455  |
| Isovaleryl-CoA dehydrogenase, mitochondrial OS=Mus musculus GN=lvd IVD_MOUSE              |                  | 46 kDa           | 0.048                                     | 22.403307                       | 0.969633333 | 1.07926667   | 0.898418679 | 1.113066795 |
| NADH dehydrogenase [ubiquinone] iron-sulfur protein 4, mitochondrial E9QPX3_MOUSE (+1)    |                  | 20 kDa           | 0.048                                     | 28.701907                       | 1.1239      | 0.94726667   | 1.186466324 | 0.842838924 |
| Protein Ogdhl OS=Mus musculus GN=Ogdhl PE=2 SV=1 E9Q7L0_MOUSE                             |                  | 117 kDa          | 0.052                                     | 23.886847                       | 0.976033333 | 0.68893333   | 1.416731179 | 0.70585021  |
| Cluster of Creatine kinase S-type, mitochondrial OS=Mus musculus GN=C KCRS_MOUSE          |                  | 47 kDa           | 0.055                                     | 26.69867                        | 1.0882      | 0.99706667   | 1.091401444 | 0.91625314  |
| Nidogen-1 OS=Mus musculus GN=Nid1 PE=1 SV=2 NID1_MOUSE                                    |                  | 137 kDa          | 0.056                                     | 21.271154                       | 1.133333333 | 1            | 1.133333333 | 0.882352941 |
| Cluster of Aspartate aminotransferase, cytoplasmic OS=Mus musculus G AATC_MOUSE [2]       |                  | 46 kDa           | 0.06                                      | 21.676573                       | 0.933333333 | 1.06666667   | 0.875       | 1.142857143 |
| Cluster of 6-phosphofructokinase, muscle type OS=Mus musculus GN=Pf K6PF_MOUSE            |                  | 85 kDa           | 0.062                                     | 22.191806                       | 1.033333333 | 1.2          | 0.861111111 | 1.161290323 |
| Cytoplasmic dynein 1 heavy chain 1 OS=Mus musculus GN=Dync1h1 PE= DYHC1_MOUSE             |                  | 532 kDa          | 0.067                                     | 20.347059                       | 0.9722      | 1.03333333   | 0.935483871 | 1.068965517 |
| Isocitrate dehydrogenase [NADP], mitochondrial OS=Mus musculus GN= IDHP_MOUSE             |                  | 51 kDa           | 0.068                                     | 25.900894                       | 0.966666667 | 1.1          | 0.878787879 | 1.137931034 |
| Transgelin OS=Mus musculus GN=Tagln PE=1 SV=3 TAGL_MOUSE                                  |                  | 23 kDa           | 0.08                                      | 22.099005                       | 0.9         | 0.76666667   | 1.173913043 | 0.851851852 |
| Cluster of Keratin, type I cytoskeletal 10 OS=Homo sapiens GN=KRT10 PEK1C10_HUMAN [11]    |                  | 60 kDa           | 0.09                                      | 34.07775                        | 0.8         | 1.63333333   | 0.489795918 | 2.041666667 |
| Annxin A5 OS=Mus musculus GN=Anxa5 PE=1 SV=1 ANXA5_MOUSE                                  |                  | 36 kDa           | 0.11                                      | 23.054731                       | 0.8086      | 0.93333333   | 0.857142857 | 1.166666667 |
| Peptidyl-prolyl cis-trans isomerase F, mitochondrial OS=Mus musculus G PPIF_MOUSE         |                  | 22 kDa           | 0.11                                      | 25.33626                        | 1.033333333 | 0.93333333   | 1.107142857 | 0.903225806 |
| Fumarate hydratase, mitochondrial OS=Mus musculus GN=Fh PE=1 SV=3 FUMH_MOUSE (+1)         |                  | 54 kDa           | 0.13                                      | 24.246356                       | 1.1         | 1.2          | 0.916666667 | 1.090909091 |
| L-lactate dehydrogenase B chain OS=Mus musculus GN=Ldhb PE=1 SV=2 LDHB_MOUSE              |                  | 37 kDa           | 0.15                                      | 22.569285                       | 1.1579      | 1.1          | 1.060606061 | 0.942857143 |
| 40S ribosomal protein S11 OS=Mus musculus GN=Rps11 PE=2 SV=3 RS11_MOUSE                   |                  | 18 kDa           | 0.15                                      | 19.645563                       | 0.933333333 | 1.1          | 0.848484848 | 1.178571429 |
| 60S ribosomal protein L7 OS=Mus musculus GN=Rpl7 PE=2 SV=2 RL7_MOUSE                      |                  | 31 kDa           | 0.17                                      | 20.453222                       | 1           | 1.06666667   | 0.9375      | 1.066666667 |
| Dehydrogenase/reductase SDR family member 4 OS=Mus musculus GN= DHRS4_MOUSE               |                  | 30 kDa           | 0.18                                      | 21.563943                       | 1.033333333 | 1.26666667   | 0.815789474 | 1.225806452 |
| Profilin-1 OS=Mus musculus GN=Pfn1 PE=1 SV=2 PROF1_MOUSE                                  |                  | 15 kDa           | 0.18                                      | 22.549726                       | 0.766666667 | 1.03333333   | 0.741935484 | 1.347826087 |
| BAG family molecular chaperone regulator 3 OS=Mus musculus GN=Bag: BAG3_MOUSE             |                  | 62 kDa           | 0.19                                      | 22.774442                       | 0.866666667 | 0.76666667   | 1.130434783 | 0.884615385 |
| Ryanodine receptor 2 OS=Mus musculus GN=Ryr2 PE=1 SV=1 RYR2_MOUSE                         |                  | 565 kDa          | 0.2                                       | 22.876436                       | 1.152133333 | 1.23333333   | 0.945945946 | 1.057142857 |
| Lamin-B1 OS=Mus musculus GN=Lmnb1 PE=1 SV=3 LMNB1_MOUSE                                   |                  | 67 kDa           | 0.22                                      | 21.16764                        | 0.966666667 | 1            | 0.966666667 | 1.034482759 |
| Histone H4 OS=Mus musculus GN=Hist1h4a PE=1 SV=2 H4_MOUSE                                 |                  | 11 kDa           | 0.25                                      | 23.792167                       | 0.933333333 | 1.16666667   | 0.8         | 1.25        |

|                                                                                                  |         |      |           |             |            |             |             |
|--------------------------------------------------------------------------------------------------|---------|------|-----------|-------------|------------|-------------|-------------|
| NADH dehydrogenase [ubiquinone] 1 alpha subcomplex subunit 9, mitocNDUA9_MOUSE                   | 43 kDa  | 0.29 | 21.757936 | 1           | 1.13333333 | 0.882352941 | 1.13333333  |
| Voltage-dependent anion-selective channel protein 1 OS=Mus musculus VDAC1_MOUSE                  | 32 kDa  | 0.33 | 24.582472 | 1.03333333  | 1.2        | 0.861111111 | 1.161290323 |
| SET and MYND domain-containing protein 1 OS=Mus musculus GN=SmyrG5E8R7_MOUSE (+1)                | 53 kDa  | 0.37 | 21.227764 | 0.9         | 1          | 0.9         | 1.111111111 |
| ATP synthase subunit alpha, mitochondrial OS=Mus musculus GN=Atp5a ATPA_MOUSE                    | 60 kDa  | 0.38 | 27.822062 | 1           | 1          | 1           | 1           |
| Cluster of cAMP-dependent protein kinase type I-alpha regulatory subunit KAPO_MOUSE              | 43 kDa  | 0.53 | 20.9113   | 0.83333333  | 1          | 0.83333333  | 1.2         |
| NADP-dependent malic enzyme, mitochondrial OS=Mus musculus GN=MMAON_MOUSE                        | 67 kDa  | 0.55 | 20.798239 | 1.13333333  | 1          | 1.13333333  | 0.882352941 |
| Carnitine O-acetyltransferase OS=Mus musculus GN=Crat PE=1 SV=3 CACP_MOUSE (+1)                  | 71 kDa  | 0.64 | 21.854895 | 1.13333333  | 1.23333333 | 0.918918919 | 1.088235294 |
| ATP synthase subunit beta, mitochondrial OS=Mus musculus GN=Atp5b ATPB_MOUSE                     | 56 kDa  | 0.66 | 28.71563  | 1.1         | 1          | 1.1         | 0.909090909 |
| 60S ribosomal protein L34 OS=Mus musculus GN=Rpl34 PE=3 SV=2 RL34_MOUSE                          | 13 kDa  | 0.71 | 19.921245 | 0.966666667 | 1.13333333 | 0.852941176 | 1.172413793 |
| Hsc70-interacting protein OS=Mus musculus GN=St13 PE=2 SV=1 F10A1_MOUSE                          | 42 kDa  | 0.72 | 23.409216 | 0.83333333  | 0.9        | 0.925925926 | 1.08        |
| Protein Ahnak OS=Mus musculus GN=Ahnak PE=2 SV=1 E9Q616_MOUSE                                    | 604 kDa | 0.94 | 20.490229 | 0.93333333  | 0.9        | 1.037037037 | 0.964285714 |
| Cluster of Isoform 2 of Titin OS=Mus musculus GN=Ttn (sp A2ASS6-2 T11sp A2ASS6-2 TITIN_MOUSE [5  | ?       | 1    | 67.696446 | 1.03333333  | 0.96666667 | 1.068965517 | 0.935483871 |
| Cluster of Actin, alpha cardiac muscle 1 OS=Mus musculus GN=Actc1 PE=ACTC_MOUSE [5]              | 42 kDa  | 1    | 245.10705 | 0.966666667 | 0.96666667 | 1           | 1           |
| Cluster of Serum albumin OS=Mus musculus GN=Alb PE=1 SV=3 (ALBU_NALBU_MOUSE [2]                  | 69 kDa  | 1    | 27.63054  | 0.83333333  | 0.8        | 1.041666667 | 0.96        |
| Cluster of Tropomyosin 1, alpha, isoform CRA_c OS=Mus musculus GN=TQ8BP43_MOUSE [10]             | 33 kDa  | 1    | 282.96332 | 1           | 0.83333333 | 1.2         | 0.83333333  |
| Cluster of Beta-globin OS=Mus musculus GN=Hbb-b1 PE=3 SV=1 (A8DUK A8DUK4_MOUSE [4]               | 16 kDa  | 1    | 55.050486 | 1.066666667 | 1.2        | 0.888888889 | 1.125       |
| Cluster of Myoglobin OS=Mus musculus GN=Mb PE=1 SV=3 (MYG_MOUSE;MYG_MOUSE                        | 17 kDa  | 1    | 34.685573 | 0.9         | 0.86666667 | 1.038461538 | 0.962962963 |
| Cluster of Hemoglobin subunit alpha OS=Mus musculus GN=Hba PE=1 SV=HBA_MOUSE [3]                 | 15 kDa  | 1    | 33.199462 | 1           | 1.1        | 0.909090909 | 1.1         |
| Aconitate hydratase, mitochondrial OS=Mus musculus GN=Aco2 PE=1 SV=ACON_MOUSE                    | 85 kDa  | 1    | 26.961797 | 1.03333333  | 1.03333333 | 1           | 1           |
| Myosin-binding protein C, cardiac-type OS=Mus musculus GN=Mybpc3 PE9Q9T8_MOUSE (+1)              | 141 kDa | 1    | 24.626884 | 1           | 1          | 1           | 1           |
| Cluster of Isoform 2 of Sarcoplasmic/endoplasmic reticulum calcium ATP sp O55143-2 AT2A2_MOUSE [ | ?       | 1    | 42.964727 | 1.2         | 1.26666667 | 0.947368421 | 1.055555556 |
| Cluster of Myosin light chain 3 OS=Mus musculus GN=Myl3 PE=1 SV=4 (NMYL3_MOUSE [3]               | 22 kDa  | 1    | 52.16608  | 0.9         | 0.96666667 | 0.931034483 | 1.074074074 |
| Cluster of Fatty acid-binding protein, heart OS=Mus musculus GN=Fabp3 FABPH_MOUSE [3]            | 15 kDa  | 1    | 89.24998  | 0.93333333  | 0.9        | 1.037037037 | 0.964285714 |
| Malate dehydrogenase, mitochondrial OS=Mus musculus GN=Mdh2 PE= MDHM_MOUSE                       | 36 kDa  | 1    | 26.973465 | 1.03333333  | 1.06666667 | 0.96875     | 1.032258065 |
| Cluster of Alpha-actinin-2 OS=Mus musculus GN=Actn2 PE=1 SV=2 (ACTNACTN2_MOUSE [5]               | 104 kDa | 1    | 22.692557 | 1.03333333  | 1.1        | 0.939393939 | 1.064516129 |
| Myomesin-1 OS=Mus musculus GN=Myom1 PE=1 SV=2 MYOM1_MOUSE                                        | 185 kDa | 1    | 22.959904 | 0.9         | 0.9        | 1           | 1           |
| Myomesin 2 OS=Mus musculus GN=Myom2 PE=2 SV=1 Q14B15_MOUSE                                       | 165 kDa | 1    | 24.28174  | 0.966666667 | 1          | 0.966666667 | 1.034482759 |
| Very long-chain specific acyl-CoA dehydrogenase, mitochondrial OS=Mu:ACADV_MOUSE                 | 71 kDa  | 1    | 24.606413 | 1.102866667 | 1.06666667 | 1.03125     | 0.96969697  |
| Trifunctional enzyme subunit alpha, mitochondrial OS=Mus musculus GNECHA_MOUSE                   | 83 kDa  | 1    | 24.56266  | 1.114766667 | 1.06666667 | 1.03125     | 0.96969697  |
| Cluster of ADP/ATP translocase 1 OS=Mus musculus GN=Slc25a4 PE=1 SV=ADT1_MOUSE [2]               | 33 kDa  | 1    | 39.76799  | 1.03333333  | 1.16666667 | 0.885714286 | 1.129032258 |
| Cluster of Creatine kinase M-type OS=Mus musculus GN=Ckm PE=1 SV=1KCRM_MOUSE [2]                 | 43 kDa  | 1    | 33.107814 | 1.066666667 | 1          | 1.066666667 | 0.9375      |
| Long-chain specific acyl-CoA dehydrogenase, mitochondrial OS=Mus mu:ACADL_MOUSE                  | 48 kDa  | 1    | 23.451269 | 1.066666667 | 1.03333333 | 1.032258065 | 0.96875     |
| Cluster of Glycogen phosphorylase, muscle form OS=Mus musculus GN=PYGM_MOUSE [3]                 | 97 kDa  | 1    | 61.175907 | 1.03333333  | 1.16666667 | 0.885714286 | 1.129032258 |
| Cluster of Glyceraldehyde-3-phosphate dehydrogenase OS=Mus musculus D3Z0Z9_MOUSE [4]             | 36 kDa  | 1    | 229.86999 | 0.966666667 | 1.03333333 | 0.935483871 | 1.068965517 |
| Malate dehydrogenase, cytoplasmic OS=Mus musculus GN=Mdh1 PE=1 MDHC_MOUSE                        | 37 kDa  | 1    | 30.740502 | 1.03333333  | 1          | 1.03333333  | 0.967741935 |
| Desmin OS=Mus musculus GN=Des PE=1 SV=3 DESM_MOUSE                                               | 53 kDa  | 1    | 23.111612 | 0.93333333  | 0.96666667 | 0.965517241 | 1.035714286 |
| NADH-ubiquinone oxidoreductase 75 kDa subunit, mitochondrial OS=Mu:NDUS1_MOUSE                   | 80 kDa  | 1    | 23.431645 | 1.1         | 1.06666667 | 1.03125     | 0.96969697  |
| Desmoplakin OS=Mus musculus GN=Dsp PE=2 SV=1 DESP_MOUSE                                          | 333 kDa | 1    | 20.91065  | 1           | 1          | 1           | 1           |
| Cluster of Citrate synthase, mitochondrial OS=Mus musculus GN=Cs PE=:CISY_MOUSE [2]              | 52 kDa  | 1    | 23.998831 | 1.1         | 1.13333333 | 0.970588235 | 1.03030303  |
| 3-ketoacyl-CoA thiolase, mitochondrial OS=Mus musculus GN=Acaa2 PE=THIM_MOUSE                    | 42 kDa  | 1    | 23.681417 | 1.09133333  | 1.06666667 | 1.03125     | 0.96969697  |
| Cluster of Plectin OS=Mus musculus GN=Plec PE=1 SV=2 (PLEC_MOUSE) PLEC_MOUSE [2]                 | 534 kDa | 1    | 20.144194 | 0.9         | 0.93333333 | 0.964285714 | 1.037037037 |
| Cluster of Serotransferrin OS=Mus musculus GN=Tf PE=1 SV=1 (TRFE_M(TRFE_MOUSE [4]                | 77 kDa  | 1    | 28.733036 | 0.766666667 | 0.76666667 | 1           | 1           |
| Electron transfer flavoprotein subunit alpha, mitochondrial OS=Mus musculus ETFA_MOUSE           | 35 kDa  | 1    | 24.426578 | 1.108266667 | 1.06666667 | 1.03125     | 0.96969697  |
| Troponin I, cardiac muscle OS=Mus musculus GN=Tnni3 PE=1 SV=2 TNNI3_MOUSE                        | 24 kDa  | 1    | 33.88926  | 0.766666667 | 0.76666667 | 1           | 1           |
| Cluster of Fructose-bisphosphate aldolase OS=Mus musculus GN=Aldoa IA6ZI44_MOUSE [3]             | 45 kDa  | 1    | 24.518725 | 0.966666667 | 0.93333333 | 1.035714286 | 0.965517241 |
| Cluster of Heat shock cognate 71 kDa protein OS=Mus musculus GN=Hsp HSP7C_MOUSE [5]              | 71 kDa  | 1    | 25.833014 | 0.8449      | 0.96666667 | 0.896551724 | 1.115384615 |
| Trifunctional enzyme subunit beta, mitochondrial OS=Mus musculus GN=ECHB_MOUSE                   | 51 kDa  | 1    | 22.729386 | 1           | 1.03333333 | 0.967741935 | 1.03333333  |
| Cluster of Spectrin alpha chain, non-erythrocytic 1 OS=Mus musculus GNE9Q447_MOUSE [2]           | 285 kDa | 1    | 47.704542 | 0.83333333  | 1.03333333 | 0.806451613 | 1.24        |
| Cluster of Obscurin OS=Mus musculus GN=Obscn PE=2 SV=2 (OBSCN_M(OBSCN_MOUSE [3]                  | 966 kDa | 1    | 32.373226 | 1           | 1          | 1           | 1           |
| Aspartate aminotransferase, mitochondrial OS=Mus musculus GN=Got2 AATM_MOUSE                     | 47 kDa  | 1    | 24.026474 | 1.03333333  | 1          | 1.03333333  | 0.967741935 |
| Stress-70 protein, mitochondrial OS=Mus musculus GN=Hspa9 PE=1 SV= GRP75_MOUSE                   | 73 kDa  | 1    | 26.49515  | 0.8759      | 0.83333333 | 1.04        | 0.961538462 |
| Cluster of Mitochondrial inner membrane protein OS=Mus musculus GN E9Q800_MOUSE [3]              | 76 kDa  | 1    | 19.795075 | 0.9         | 0.86666667 | 1.038461538 | 0.962962963 |
| Cluster of Nebulette OS=Mus musculus GN=Nebi PE=2 SV=1 (B7ZC12_MCB7ZC12_MOUSE [3]                | 116 kDa | 1    | 22.83046  | 0.93333333  | 0.9        | 1.037037037 | 0.964285714 |

|                                                                         |                                                            |         |   |           |            |            |             |             |
|-------------------------------------------------------------------------|------------------------------------------------------------|---------|---|-----------|------------|------------|-------------|-------------|
| Succinate dehydrogenase [ubiquinone] flavoprotein subunit, mitochondria | DHSA_MOUSE                                                 | 73 kDa  | 1 | 23.865125 | 1.06666667 | 1          | 1.06666667  | 0.9375      |
| Medium-chain specific acyl-CoA dehydrogenase, mitochondrial             | OS=Mus ACADM_MOUSE                                         | 46 kDa  | 1 | 23.873384 | 0.96666667 | 1.03333333 | 0.935483871 | 1.068965517 |
| Cytochrome b-c1 complex subunit 2, mitochondrial                        | OS=Mus musculus G QCR2_MOUSE                               | 48 kDa  | 1 | 21.78257  | 1.06666667 | 1          | 1.06666667  | 0.9375      |
| Cluster of 14-3-3 protein gamma                                         | OS=Mus musculus GN=Ywhag PE=1 SV=1433G_MOUSE [9]           | 28 kDa  | 1 | 52.50082  | 0.96666667 | 1          | 0.96666667  | 1.034482759 |
| Cluster of Beta-enolase                                                 | OS=Mus musculus GN=Eno3 PE=1 SV=3 [ENOB_ENOB_MOUSE [3]     | 47 kDa  | 1 | 24.989203 | 1.1218     | 1.1        | 1.03030303  | 0.970588235 |
| Cluster of Phosphoglycerate kinase 1                                    | OS=Mus musculus GN=Pgk1 PE=1 SPGK1_MOUSE [2]               | 45 kDa  | 1 | 26.37556  | 0.9        | 0.9        | 1           | 1           |
| Cluster of Vimentin                                                     | OS=Mus musculus GN=Vim PE=1 SV=3 [VIME_MOUSVIME_MOUSE [19] | 54 kDa  | 1 | 42.01593  | 0.83333333 | 0.96666667 | 0.862068966 | 1.16        |
| Cluster of Isoform M1 of Pyruvate kinase PKM                            | OS=Mus musculus GN=Pks1p [P52480-2] KPYM_MOUSE [2]         | ?       | 1 | 27.36292  | 1.06666667 | 1          | 1.06666667  | 0.9375      |
| Isocitrate dehydrogenase [NAD] subunit alpha, mitochondrial             | OS=Mus m IDH3A_MOUSE                                       | 40 kDa  | 1 | 23.894511 | 1.06666667 | 1.03333333 | 1.032258065 | 0.96875     |
| Electron transfer flavoprotein subunit beta                             | OS=Mus musculus GN=Etfb P ETFB_MOUSE                       | 28 kDa  | 1 | 25.35792  | 1          | 1          | 1           | 1           |
| Acetyl-CoA acetyltransferase, mitochondrial                             | OS=Mus musculus GN=Acat THIL_MOUSE                         | 45 kDa  | 1 | 26.787162 | 0.93333333 | 0.86666667 | 1.076923077 | 0.928571429 |
| 60 kDa heat shock protein, mitochondrial                                | OS=Mus musculus GN=Hspd1 ICH60_MOUSE                       | 61 kDa  | 1 | 32.386965 | 0.8        | 0.83333333 | 0.96        | 1.041666667 |
| Electron transfer flavoprotein-ubiquinone oxidoreductase, mitochondria  | ETFDF_MOUSE                                                | 68 kDa  | 1 | 21.524051 | 1.03333333 | 1.06666667 | 0.96875     | 1.032258065 |
| Pyruvate dehydrogenase E1 component subunit alpha, somatic form, mi     | ODPA_MOUSE                                                 | 43 kDa  | 1 | 22.96659  | 0.96666667 | 0.96666667 | 1           | 1           |
| Vinculin                                                                | OS=Mus musculus GN=Vcl PE=1 SV=4 VINC_MOUSE                | 117 kDa | 1 | 21.79835  | 1.06666667 | 1.06666667 | 1           | 1           |
| Cluster of Cytochrome c, somatic                                        | OS=Mus musculus GN=Cycc PE=1 SV=2 CYC_MOUSE [2]            | 12 kDa  | 1 | 41.80578  | 1.03333333 | 1.4        | 0.738095238 | 1.35483871  |
| ATP synthase subunit gamma                                              | OS=Mus musculus GN=Atp5c1 PE=3 SV=1 A2AKU9_MOUSE           | 33 kDa  | 1 | 23.889059 | 1.13333333 | 1.1        | 1.03030303  | 0.970588235 |
| Cluster of Sodium/potassium-transporting ATPase subunit alpha-1         | OS=Mat1A1_MOUSE [6]                                        | 113 kDa | 1 | 23.945752 | 1.13333333 | 1.16666667 | 0.971428571 | 1.029411765 |
| Succinyl-CoA ligase [ADP-forming] subunit beta, mitochondrial           | OS=Mus r SUCB1_MOUSE                                       | 50 kDa  | 1 | 24.177477 | 1.05393333 | 1.03333333 | 1           | 1           |
| Cytochrome b-c1 complex subunit 1, mitochondrial                        | OS=Mus musculus G QCR1_MOUSE                               | 53 kDa  | 1 | 22.792082 | 0.96666667 | 0.96666667 | 1           | 1           |
| Cluster of Histone H2B type 1-H                                         | OS=Mus musculus GN=Hist1h2b PE=1 H2B1H_MOUSE [6]           | 14 kDa  | 1 | 0         | #VALUE!    | #VALUE!    | #VALUE!     | #VALUE!     |
| Cluster of LIM domain-binding protein 3                                 | OS=Mus musculus GN=Ldb3 PE=LDB3_MOUSE [2]                  | 76 kDa  | 1 | 31.008857 | 1          | 0.93333333 | 1.071428571 | 0.93333333  |
| Pyruvate dehydrogenase E1 component subunit beta, mitochondrial         | OS=ODPB_MOUSE                                              | 39 kDa  | 1 | 24.32211  | 1          | 0.96666667 | 1.034482759 | 0.96666667  |
| Troponin C, slow skeletal and cardiac muscles                           | OS=Mus musculus GN=Tnni1 TNNC1_MOUSE                       | 18 kDa  | 1 | 32.55204  | 1.23333333 | 1.1        | 1.121212121 | 0.891891892 |
| Succinate dehydrogenase [ubiquinone] iron-sulfur subunit, mitochondria  | DHSB_MOUSE                                                 | 32 kDa  | 1 | 24.417116 | 1.06666667 | 1.03333333 | 1.032258065 | 0.96875     |
| Cluster of Phosphoglycerate mutase 2                                    | OS=Mus musculus GN=Pgam2 PE=PGAM2_MOUSE [2]                | 29 kDa  | 1 | 65.760255 | 0.93333333 | 1.03333333 | 0.903225806 | 1.107142857 |
| 2-oxoglutarate dehydrogenase, mitochondrial                             | OS=Mus musculus GN=Og ODO1_MOUSE                           | 116 kDa | 1 | 24.993779 | 1.03333333 | 0.96666667 | 1.068965517 | 0.935483871 |
| Dihydropyridine dehydrogenase, mitochondrial                            | OS=Mus musculus GN=Dld DLDH_MOUSE                          | 54 kDa  | 1 | 24.803832 | 0.93333333 | 0.9        | 1.037037037 | 0.964285714 |
| Cytochrome c oxidase subunit 5A, mitochondrial                          | OS=Mus musculus GN=COX5A_MOUSE                             | 16 kDa  | 1 | 27.938437 | 0.96666667 | 0.83333333 | 1.16        | 0.862068966 |
| Enoyl-CoA hydratase, mitochondrial                                      | OS=Mus musculus GN=Echs1 PE=1 SECHM_MOUSE                  | 31 kDa  | 1 | 23.648663 | 0.93333333 | 1.06666667 | 0.875       | 1.142857143 |
| Cluster of Annexin A6                                                   | OS=Mus musculus GN=Anxa6 PE=1 SV=3 [ANXA6_ANXA6_MOUSE [2]  | 76 kDa  | 1 | 12.771863 | 1.2        | 1.25       | 0.96        | 1.041666667 |
| Cluster of Prelamin A/C                                                 | OS=Mus musculus GN=Lmna PE=1 SV=2 [LMNA_LMNA_MOUSE [2]     | 74 kDa  | 1 | 21.014996 | 0.9        | 0.96666667 | 0.931034483 | 1.074074074 |
| MCG10343, isoform CRA_b                                                 | OS=Mus musculus GN=Slc25a3 PE=3 SV=1 G5E902_MOUSE          | 40 kDa  | 1 | 25.821653 | 1.06666667 | 1.16666667 | 0.914285714 | 1.09375     |
| Cluster of NADH dehydrogenase [ubiquinone] flavoprotein 1, mitochondria | NDUV1_MOUSE [2]                                            | 51 kDa  | 1 | 22.568347 | 1.03333333 | 1.16666667 | 0.885714286 | 1.129032258 |
| Apolipoprotein A-I                                                      | OS=Mus musculus GN=Apoa1 PE=1 SV=2 APOA1_MOUSE             | 31 kDa  | 1 | 24.274969 | 0.9        | 0.9        | 1           | 1           |
| Elongation factor Tu                                                    | OS=Mus musculus GN=Gm9755 PE=3 SV=1 D3YVN7_MOUSE (+1)      | 50 kDa  | 1 | 22.029337 | 1          | 1          | 1           | 1           |
| Triosephosphate isomerase                                               | OS=Mus musculus GN=Tpi1 PE=1 SV=4 TPIS_MOUSE               | 32 kDa  | 1 | 22.664697 | 0.86666667 | 0.93333333 | 0.928571429 | 1.076923077 |
| ATP synthase-coupling factor 6, mitochondrial                           | OS=Mus musculus GN=At ATP5J_MOUSE                          | 12 kDa  | 1 | 34.429255 | 0.96666667 | 0.8        | 1.208333333 | 0.827586207 |
| Spectrin beta chain, non-erythrocytic 1                                 | OS=Mus musculus GN=Sptbn1 PESPBT2_MOUSE                    | 274 kDa | 1 | 21.447621 | 1          | 1          | 1           | 1           |
| Cluster of Histone H1.4                                                 | OS=Mus musculus GN=Hist1h1e PE=1 SV=2 [H14_H14_MOUSE [3]   | 22 kDa  | 1 | 22.55826  | 1          | 0.93333333 | 1.071428571 | 0.93333333  |
| Hydroxyacyl-coenzyme A dehydrogenase, mitochondrial                     | OS=Mus musculus HCDH_MOUSE                                 | 34 kDa  | 1 | 25.603878 | 1.06666667 | 1.03333333 | 1.032258065 | 0.96875     |
| Nascent polypeptide-associated complex subunit alpha, muscle-specific   | NACAM_MOUSE                                                | 220 kDa | 1 | 21.927986 | 0.93333333 | 0.93333333 | 1           | 1           |
| Cluster of Glutathione S-transferase Mu 1                               | OS=Mus musculus GN=Gstm1 GSTM1_MOUSE [5]                   | 26 kDa  | 1 | 41.137487 | 1.06666667 | 1.1        | 0.96969697  | 1.03125     |
| Cluster of Alpha-1-antitrypsin 1-1                                      | OS=Mus musculus GN=Serpina1a PE=1A1AT1_MOUSE [4]           | 46 kDa  | 1 | 78.461015 | 0.96666667 | 1.03333333 | 0.935483871 | 1.068965517 |
| Alpha-crystallin B chain                                                | OS=Mus musculus GN=Cryab PE=1 SV=2 CRYAB_MOUSE             | 20 kDa  | 1 | 27.167386 | 0.8        | 0.8        | 1           | 1           |
| Isoform Cytoplasmic+peroxisomal of Peroxiredoxin-5, mitochondrial       | OS=sp [P99029-2] PRDX5_MOUSE                               | ?       | 1 | 26.87764  | 1.06666667 | 1          | 1.06666667  | 0.9375      |
| Cluster of Cytochrome c oxidase subunit 4 isoform 1, mitochondria       | OS=COX4I_MOUSE [2]                                         | 20 kDa  | 1 | 23.022999 | 1          | 1.06666667 | 0.9375      | 1.06666667  |
| Isocitrate dehydrogenase 3 (NAD+) beta                                  | OS=Mus musculus GN=Idh3b PEQ91VA7_MOUSE                    | 42 kDa  | 1 | 21.312723 | 1.13333333 | 1.13333333 | 1           | 1           |
| Dihydropyridine residue acetyltransferase component of pyruvate de      | ODP2_MOUSE                                                 | 68 kDa  | 1 | 21.505937 | 0.9        | 0.9        | 1           | 1           |
| Cluster of ATP synthase subunit O, mitochondrial                        | OS=Mus musculus GN=ATPO_MOUSE                              | 23 kDa  | 1 | 25.889695 | 0.93333333 | 0.96666667 | 0.965517241 | 1.035714286 |
| Succinyl-CoA:3-ketoacid coenzyme A transferase 1, mitochondria          | OS=M SCOT1_MOUSE                                           | 56 kDa  | 1 | 23.77109  | 1          | 1.03333333 | 0.967741935 | 1.03333333  |
| 10 kDa heat shock protein, mitochondria                                 | OS=Mus musculus GN=Hspe1 ICH10_MOUSE                       | 11 kDa  | 1 | 27.067035 | 0.7375     | 0.73333333 | 1           | 1           |
| Cluster of L-lactate dehydrogenase                                      | OS=Mus musculus GN=Ldha PE=3 SV=G5E8N5_MOUSE [3]           | 40 kDa  | 1 | 20.868783 | 1.03333333 | 1.13333333 | 0.911764706 | 1.096774194 |

|                                                                                                 |         |   |           |             |             |             |             |
|-------------------------------------------------------------------------------------------------|---------|---|-----------|-------------|-------------|-------------|-------------|
| Superoxide dismutase [Mn], mitochondrial OS=Mus musculus GN=Sod2 ISODM_MOUSE                    | 25 kDa  | 1 | 25.42007  | 1           | 1           | 1           | 1           |
| Cluster of Tubulin beta-4B chain OS=Mus musculus GN=Tubb4b PE=1 SV:TBB4B_MOUSE [4]              | 50 kDa  | 1 | 1126.6539 | 0.833333333 | 0.933333333 | 0.892857143 | 1.12        |
| Myozenin-2 OS=Mus musculus GN=Myoz2 PE=1 SV=1 MYOZ2_MOUSE                                       | 30 kDa  | 1 | 24.08687  | 1.033333333 | 0.966666667 | 1.068965517 | 0.935483871 |
| Succinyl-CoA ligase [ADP/GDP-forming] subunit alpha, mitochondrial OS:SUCA_MOUSE                | 36 kDa  | 1 | 23.905633 | 1.033333333 | 1.066666667 | 0.96875     | 1.032258065 |
| ATP synthase subunit b, mitochondrial OS=Mus musculus GN=Atp5f1 PE:AT5F1_MOUSE                  | 29 kDa  | 1 | 25.549453 | 0.966666667 | 0.966666667 | 1           | 1           |
| Cluster of Carnitine O-palmitoyltransferase 2, mitochondrial OS=Mus muCPT2_MOUSE                | 74 kDa  | 1 | 22.652262 | 1.033333333 | 1.1         | 0.939393939 | 1.064516129 |
| Cytochrome c oxidase subunit 6B1 OS=Mus musculus GN=Cox6b1 PE=1 CX6B1_MOUSE                     | 10 kDa  | 1 | 24.99389  | 0.966666667 | 1           | 0.966666667 | 1.034482759 |
| Cluster of Basement membrane-specific heparan sulfate proteoglycan ccB1B0C7_MOUSE [2]           | 469 kDa | 1 | 30.051085 | 1           | 0.966666667 | 1.034482759 | 0.966666667 |
| Cluster of Peroxiredoxin-1 OS=Mus musculus GN=Prdx1 PE=1 SV=1 (PRD:PRDX1_MOUSE                  | 22 kDa  | 1 | 22.737333 | 1           | 1.1         | 0.909090909 | 1.1         |
| Cluster of Nucleoside diphosphate kinase OS=Mus musculus GN=Gm203 E9PZF0_MOUSE [3]              | 30 kDa  | 1 | 30.421865 | 0.966666667 | 0.966666667 | 1           | 1           |
| Enoyl-CoA delta isomerase 1, mitochondrial OS=Mus musculus GN=Eci1 ECI1_MOUSE                   | 32 kDa  | 1 | 22.536466 | 1.096       | 1.1         | 1           | 1           |
| Cluster of Sorbin and SH3 domain-containing protein 2 OS=Mus musculus B2RXQ9_MOUSE [5]          | 72 kDa  | 1 | 22.198606 | 0.766666667 | 0.733333333 | 1.045454545 | 0.956521739 |
| Cluster of ATP synthase subunit d, mitochondrial OS=Mus musculus GN=ATP5H_MOUSE [2]             | 19 kDa  | 1 | 25.14485  | 0.933333333 | 0.866666667 | 1.076923077 | 0.928571429 |
| Cluster of Isoform 2 of Adenylate kinase isoenzyme 1 OS=Mus musculus sp Q9R0Y5-2 KAD1_MOUSE [2] | ?       | 1 | 15.728442 | 0.933333333 | 0.9         | 1.037037037 | 0.964285714 |
| 78 kDa glucose-regulated protein OS=Mus musculus GN=Hspa5 PE=1 SV:GRP78_MOUSE                   | 72 kDa  | 1 | 22.931659 | 0.9         | 0.933333333 | 0.964285714 | 1.037037037 |
| Carnitine O-palmitoyltransferase 1, muscle isoform OS=Mus musculus GICPT1B_MOUSE                | 88 kDa  | 1 | 21.052587 | 1.066666667 | 1.1         | 0.96969697  | 1.03125     |
| Phosphoglucomutase-1 OS=Mus musculus GN=Pgm1 PE=1 SV=4 PGM1_MOUSE                               | 61 kDa  | 1 | 20.52368  | 1.166666667 | 1.2         | 0.972222222 | 1.028571429 |
| Filamin-C OS=Mus musculus GN=Flnc PE=1 SV=3 FLNC_MOUSE                                          | 291 kDa | 1 | 21.376863 | 0.966666667 | 0.9         | 1.074074074 | 0.931034483 |
| Dihydropolyllysine-residue succinyltransferase component of 2-oxoglutarate ODO2_MOUSE           | 49 kDa  | 1 | 23.038653 | 1           | 0.966666667 | 1.034482759 | 0.966666667 |
| Thioredoxin-dependent peroxide reductase, mitochondrial OS=Mus musculus PRDX3_MOUSE             | 28 kDa  | 1 | 23.396891 | 1.066666667 | 1.1         | 0.96969697  | 1.03125     |
| Transitional endoplasmic reticulum ATPase OS=Mus musculus GN=Vcp P TERA_MOUSE                   | 89 kDa  | 1 | 23.00108  | 0.996466667 | 1           | 1           | 1           |
| NADH dehydrogenase [ubiquinone] iron-sulfur protein 2, mitochondrial (NDUS2_MOUSE               | 53 kDa  | 1 | 23.785982 | 1.133333333 | 1.166666667 | 0.971428571 | 1.029411765 |
| NADH dehydrogenase [ubiquinone] 1 alpha subcomplex subunit 10, mitochondrial (NDUAA_MOUSE       | 41 kDa  | 1 | 22.33221  | 1.033333333 | 1.033333333 | 1           | 1           |
| Alpha-2-macroglobulin OS=Mus musculus GN=A2m PE=1 SV=3 A2M_MOUSE (+1)                           | 166 kDa | 1 | 21.242344 | 1.033333333 | 1.033333333 | 1           | 1           |
| Cluster of Glucose-6-phosphate isomerase OS=Mus musculus GN=Gpi PE G6PI_MOUSE [2]               | 63 kDa  | 1 | 23.293847 | 1           | 1.066666667 | 0.9375      | 1.066666667 |
| 2,4-dienoyl-CoA reductase, mitochondrial OS=Mus musculus GN=Decr1 (DECR_MOUSE                   | 36 kDa  | 1 | 23.436627 | 1.066666667 | 1.1         | 0.96969697  | 1.03125     |
| Aldose reductase OS=Mus musculus GN=Akr1b1 PE=1 SV=3 ALDR_MOUSE                                 | 36 kDa  | 1 | 21.103968 | 1           | 1           | 1           | 1           |
| ES1 protein homolog, mitochondrial OS=Mus musculus GN=D10Jhu81e FES1_MOUSE                      | 28 kDa  | 1 | 25.15947  | 0.966666667 | 1           | 0.966666667 | 1.034482759 |
| Cytochrome b-c1 complex subunit 6, mitochondrial OS=Mus musculus G QCR6_MOUSE                   | 10 kDa  | 1 | 24.470049 | 1.133333333 | 0.966666667 | 1.172413793 | 0.852941176 |
| Cytochrome b-c1 complex subunit Rieske, mitochondrial OS=Mus musculus UCRI_MOUSE                | 29 kDa  | 1 | 22.218429 | 1.033333333 | 1           | 1.033333333 | 0.967741935 |
| Voltage-dependent anion-selective channel protein 3 OS=Mus musculus J3QMG3_MOUSE (+1)           | 31 kDa  | 1 | 24.449185 | 1.066666667 | 1.166666667 | 0.914285714 | 1.09375     |
| Polymerase I and transcript release factor OS=Mus musculus GN=Ptrf PE PTRF_MOUSE                | 44 kDa  | 1 | 21.686059 | 1.1         | 1.066666667 | 1.03125     | 0.96969697  |
| Cluster of Tubulin alpha-4A chain OS=Mus musculus GN=Tuba4a PE=1 SV:TBA4A_MOUSE [5]             | 50 kDa  | 1 | 69.287926 | 0.933333333 | 0.966666667 | 0.965517241 | 1.035714286 |
| NADH dehydrogenase [ubiquinone] flavoprotein 2, mitochondrial OS=Mus musculus (NDUV2_MOUSE      | 27 kDa  | 1 | 26.41426  | 1.133333333 | 1.033333333 | 1.096774194 | 0.911764706 |
| Methylmalonate-semialdehyde dehydrogenase [acylating], mitochondrial (MMSA_MOUSE                | 58 kDa  | 1 | 22.055392 | 1.066666667 | 1.133333333 | 0.941176471 | 1.0625      |
| Delta(3,5)-Delta(2,4)-dienoyl-CoA isomerase, mitochondrial OS=Mus mu ECH1_MOUSE                 | 36 kDa  | 1 | 23.647761 | 1.033333333 | 1.133333333 | 0.911764706 | 1.096774194 |
| Cysteine and glycine-rich protein 3 OS=Mus musculus GN=Csrp3 PE=1 SV:CSR3_MOUSE                 | 21 kDa  | 1 | 25.659925 | 1.033333333 | 0.966666667 | 1.068965517 | 0.935483871 |
| Dystrophin OS=Mus musculus GN=Dmd PE=1 SV=3 DMD_MOUSE                                           | 426 kDa | 1 | 21.04594  | 0.966666667 | 0.966666667 | 1           | 1           |
| Myosin regulatory light chain 2, atrial isoform OS=Mus musculus GN=MyMLRA_MOUSE                 | 19 kDa  | 1 | 41.67893  | 0.8         | 0.9         | 0.888888889 | 1.125       |
| Cluster of Ubiquitin-40S ribosomal protein S27a OS=Mus musculus GN=FRS27A_MOUSE [2]             | 18 kDa  | 1 | 0         | 1.1         | 1.1         | 1           | 1           |
| Cluster of Acyl-coenzyme A thioesterase 2, mitochondrial OS=Mus musculus ACOT2_MOUSE [3]        | 50 kDa  | 1 | 59.91892  | 0.8         | 0.9         | 0.888888889 | 1.125       |
| Cytochrome c1, heme protein, mitochondrial OS=Mus musculus GN=Cyc CY1_MOUSE                     | 35 kDa  | 1 | 23.00798  | 1.133333333 | 1.133333333 | 1           | 1           |
| NADH dehydrogenase [ubiquinone] iron-sulfur protein 3, mitochondrial (NDUS3_MOUSE               | 30 kDa  | 1 | 24.672705 | 1.033333333 | 0.966666667 | 1.068965517 | 0.935483871 |
| NADH dehydrogenase [ubiquinone] iron-sulfur protein 6, mitochondrial (NDUS6_MOUSE               | 13 kDa  | 1 | 33.005902 | 0.9         | 0.766666667 | 1.173913043 | 0.851851852 |
| Cluster of Histone H3.1 OS=Mus musculus GN=Hist1h3a PE=1 SV=2 (H31, H31_MOUSE [4]               | 15 kDa  | 1 | 21.202742 | 0.866666667 | 0.966666667 | 0.896551724 | 1.115384615 |
| Cluster of PDZ and LIM domain protein 5 OS=Mus musculus GN=Pdlim5 (PDLI5_MOUSE [3]              | 63 kDa  | 1 | 30.018938 | 0.633333333 | 0.733333333 | 0.863636364 | 1.157894737 |
| Protein NipSnap homolog 2 OS=Mus musculus GN=Gbas PE=2 SV=1 NIP52_MOUSE (+1)                    | 33 kDa  | 1 | 21.84825  | 1.1         | 1.2         | 0.916666667 | 1.090909091 |
| Cluster of Propionyl-CoA carboxylase alpha chain, mitochondrial OS=Mus mu:PCCA_MOUSE [2]        | 80 kDa  | 1 | 21.947795 | 1.033333333 | 1.033333333 | 1           | 1           |
| Cluster of Alpha-enolase OS=Mus musculus GN=Eno1 PE=1 SV=3 (ENOA, ENOA_MOUSE [2]                | 47 kDa  | 1 | 23.470576 | 0.866666667 | 0.966666667 | 0.896551724 | 1.115384615 |
| Acyl carrier protein, mitochondrial OS=Mus musculus GN=Ndufab1 PE=1 ACPM_MOUSE (+2)             | 17 kDa  | 1 | 28.053743 | 0.9         | 0.833333333 | 1.08        | 0.925925926 |
| Elongation factor 1-alpha 2 OS=Mus musculus GN=Eef1a2 PE=1 SV=1 EF1A2_MOUSE                     | 50 kDa  | 1 | 25.993603 | 1           | 0.966666667 | 1.034482759 | 0.966666667 |
| Peptidyl-prolyl cis-trans isomerase A OS=Mus musculus GN=Ppia PE=1 SV:PIPIA_MOUSE               | 18 kDa  | 1 | 23.900767 | 0.8513      | 0.9         | 0.925925926 | 1.08        |
| NADH dehydrogenase [ubiquinone] 1 alpha subcomplex subunit 7 OS=MNDUA7_MOUSE                    | 13 kDa  | 1 | 24.66094  | 0.933333333 | 1           | 0.933333333 | 1.071428571 |

|                                                                                                          |         |   |           |             |             |             |             |
|----------------------------------------------------------------------------------------------------------|---------|---|-----------|-------------|-------------|-------------|-------------|
| Heterogeneous nuclear ribonucleoproteins A2/B1 OS=Mus musculus GN=ROA2_MOUSE                             | 37 kDa  | 1 | 21.48754  | 0.933333333 | 1           | 0.933333333 | 1.071428571 |
| Ubiquinone biosynthesis protein COQ9, mitochondrial OS=Mus musculus:COQ9_MOUSE                           | 35 kDa  | 1 | 21.19581  | 1.066666667 | 1           | 1.066666667 | 0.9375      |
| NADH dehydrogenase [ubiquinone] iron-sulfur protein 8, mitochondrial OS=Mus musculus:NDUS8_MOUSE         | 24 kDa  | 1 | 22.68523  | 1.066666667 | 1.033333333 | 1.032258065 | 0.96875     |
| Peroxiredoxin-6 OS=Mus musculus GN=Prdx6 PE=2 SV=1 D3Z0Y2_MOUSE (+1)                                     | 22 kDa  | 1 | 24.262355 | 0.9         | 0.833333333 | 1.08        | 0.925925926 |
| Cluster of Talin-1 OS=Mus musculus GN=TLn1 PE=1 SV=2 (TLN1_MOUSE) TLN1_MOUSE                             | 270 kDa | 1 | 23.284364 | 1.066666667 | 1           | 1.066666667 | 0.9375      |
| Myosin-9 OS=Mus musculus GN=Myh9 PE=1 SV=4 MYH9_MOUSE                                                    | 226 kDa | 1 | 20.120242 | 1.066666667 | 1           | 1.066666667 | 0.9375      |
| Cluster of Serine protease inhibitor A3K OS=Mus musculus GN=Serpina3 SPA3K_MOUSE [2]                     | 47 kDa  | 1 | 24.820502 | 1.033333333 | 1.033333333 | 1           | 1           |
| UTP--glucose-1-phosphate uridylyltransferase OS=Mus musculus GN=Ug UGPA_MOUSE                            | 57 kDa  | 1 | 20.789298 | 0.933333333 | 0.833333333 | 1.12        | 0.892857143 |
| Apoptosis-inducing factor 1, mitochondrial OS=Mus musculus GN=Aifm1 AIFM1_MOUSE                          | 67 kDa  | 1 | 22.026622 | 1.1         | 1.066666667 | 1.03125     | 0.96969697  |
| Cytochrome c oxidase subunit 6C OS=Mus musculus GN=Cox6c PE=1 SV= COX6C_MOUSE                            | 8 kDa   | 1 | 26.715234 | 0.866666667 | 1.033333333 | 0.838709677 | 1.192307692 |
| Four and a half LIM domains protein 2 OS=Mus musculus GN=Fhl2 PE=1 FHL2_MOUSE                            | 32 kDa  | 1 | 25.744793 | 1.033333333 | 0.966666667 | 1.068965517 | 0.935483871 |
| Lon protease homolog, mitochondrial OS=Mus musculus GN=Lonp1 PE=:LONM_MOUSE                              | 106 kDa | 1 | 21.712473 | 0.7337      | 0.766666667 | 0.956521739 | 1.045454545 |
| NADH dehydrogenase [ubiquinone] 1 alpha subcomplex subunit 8 OS=MNDUA8_MOUSE                             | 20 kDa  | 1 | 22.035451 | 0.933333333 | 1.1         | 0.848484848 | 1.178571429 |
| Cluster of Sorbin and SH3 domain-containing protein 1 OS=Mus musculus SRBS1_MOUSE [2]                    | 143 kDa | 1 | 61.279005 | 0.933333333 | 0.933333333 | 1           | 1           |
| Calsequestrin-2 OS=Mus musculus GN=Casq2 PE=2 SV=3 CASQ2_MOUSE (+1)                                      | 48 kDa  | 1 | 20.76281  | 1.033333333 | 1.1         | 0.939393939 | 1.064516129 |
| Isocitrate dehydrogenase [NAD] subunit gamma 1, mitochondrial OS=Mt IDHG1_MOUSE                          | 43 kDa  | 1 | 22.134587 | 1.033333333 | 1.033333333 | 1           | 1           |
| Cluster of Actin-binding LIM protein 1 OS=Mus musculus GN=Ablim1 PE=E9Q9C1_MOUSE [2]                     | 84 kDa  | 1 | 6.151903  | 0.9         | 0.8         | 1.125       | 0.888888889 |
| Laminin subunit gamma-1 OS=Mus musculus GN=Lamc1 PE=2 SV=1 F8VQJ3_MOUSE                                  | 177 kDa | 1 | 22.924528 | 1.1         | 0.966666667 | 1.137931034 | 0.878787879 |
| Histone H1.5 OS=Mus musculus GN=Hist1h1b PE=1 SV=2 H15_MOUSE                                             | 23 kDa  | 1 | 20.209862 | 1.1         | 1.1         | 1           | 1           |
| Prohibitin OS=Mus musculus GN=Phb PE=1 SV=1 PHB_MOUSE                                                    | 30 kDa  | 1 | 22.333796 | 0.933333333 | 0.866666667 | 1.076923077 | 0.928571429 |
| Cytochrome b-c1 complex subunit 8 OS=Mus musculus GN=Uqcrc PE=1 QCR8_MOUSE                               | 10 kDa  | 1 | 20.729516 | 1           | 1.066666667 | 0.9375      | 1.066666667 |
| Heat shock protein beta-1 OS=Mus musculus GN=Hspb1 PE=1 SV=3 HSPB1_MOUSE                                 | 23 kDa  | 1 | 25.343826 | 0.7064      | 0.733333333 | 1           | 1           |
| Cluster of Superoxide dismutase [Cu-Zn] OS=Mus musculus GN=Sod1 PE:SODC_MOUSE                            | 16 kDa  | 1 | 23.843075 | 0.933333333 | 0.866666667 | 1.076923077 | 0.928571429 |
| Moesin OS=Mus musculus GN=Msn PE=1 SV=3 MOES_MOUSE                                                       | 68 kDa  | 1 | 21.800491 | 0.87933     | 0.9         | 0.962962963 | 1.038461538 |
| NADH dehydrogenase [ubiquinone] 1 alpha subcomplex subunit 4 OS=MNDUA4_MOUSE                             | 9 kDa   | 1 | 23.565091 | 0.933333333 | 1.033333333 | 0.903225806 | 1.107142857 |
| Cluster of 3-hydroxyisobutyryl-CoA hydrolase, mitochondrial OS=Mus musculus HIBCH_MOUSE [2]              | 43 kDa  | 1 | 22.349542 | 0.866666667 | 0.833333333 | 1.04        | 0.961538462 |
| Plakophilin 2 OS=Mus musculus GN=Pkp2 PE=2 SV=1 Q9CQ73_MOUSE                                             | 88 kDa  | 1 | 20.409517 | 1           | 1           | 1           | 1           |
| Cluster of Ribosome-binding protein 1 OS=Mus musculus GN=Rrbp1 PE=A2AVJ7_MOUSE [2]                       | 158 kDa | 1 | 21.087505 | 0.966666667 | 0.933333333 | 1.035714286 | 0.965517241 |
| Protein Trdn OS=Mus musculus GN=Trdn PE=2 SV=1 E9Q9K5_MOUSE                                              | 78 kDa  | 1 | 19.730946 | 1.233333333 | 1.133333333 | 1.088235294 | 0.918918919 |
| Protein disulfide-isomerase A3 OS=Mus musculus GN=Pdia3 PE=1 SV=2 PDIA3_MOUSE                            | 57 kDa  | 1 | 21.53763  | 0.933333333 | 1           | 0.933333333 | 1.071428571 |
| Junction plakoglobin OS=Mus musculus GN=Jup PE=1 SV=3 PLAK_MOUSE                                         | 82 kDa  | 1 | 23.701087 | 1           | 1.066666667 | 0.9375      | 1.066666667 |
| Calreticulin OS=Mus musculus GN=Calr PE=1 SV=1 CALR_MOUSE                                                | 48 kDa  | 1 | 20.603183 | 0.9         | 0.933333333 | 0.964285714 | 1.037037037 |
| NADH dehydrogenase [ubiquinone] 1 alpha subcomplex subunit 2 OS=MNDUA2_MOUSE                             | 11 kDa  | 1 | 20.815434 | 1           | 1           | 1           | 1           |
| Protein DJ-1 OS=Mus musculus GN=Park7 PE=1 SV=1 PARK7_MOUSE                                              | 20 kDa  | 1 | 22.764306 | 0.9         | 0.866666667 | 1.038461538 | 0.962962963 |
| Pyruvate dehydrogenase protein X component, mitochondrial OS=Mus musculus ODPX_MOUSE                     | 54 kDa  | 1 | 20.695071 | 0.966666667 | 0.933333333 | 1.035714286 | 0.965517241 |
| Acetyl-coenzyme A synthetase 2-like, mitochondrial OS=Mus musculus GACS2L_MOUSE                          | 75 kDa  | 1 | 22.297797 | 1           | 1.1         | 0.909090909 | 1.1         |
| Cluster of EH domain-containing protein 4 OS=Mus musculus GN=Ehd4 FEHD4_MOUSE [2]                        | 61 kDa  | 1 | 73.16867  | 1.1         | 1.133333333 | 0.970588235 | 1.03030303  |
| Hexokinase 1, isoform CRA_f OS=Mus musculus GN=Hk1 PE=3 SV=1 G3UVV4_MOUSE (+1)                           | 102 kDa | 1 | 19.505818 | 1.033333333 | 1.033333333 | 1           | 1           |
| Cluster of Histone H2A.x OS=Mus musculus GN=H2afx PE=1 SV=2 (H2AX_H2AX_MOUSE [10])                       | 15 kDa  | 1 | 97.976774 | 0.933333333 | 1.033333333 | 0.903225806 | 1.107142857 |
| Cluster of Ubiquitin-like modifier-activating enzyme 1 OS=Mus musculus UBA1_MOUSE [2]                    | 118 kDa | 1 | 21.83291  | 0.966666667 | 1           | 0.966666667 | 1.034482759 |
| Cytochrome c oxidase subunit 2 OS=Mus musculus GN=Mtco2 PE=1 SV=:COX2_MOUSE (+1)                         | 26 kDa  | 1 | 25.713077 | 1.1         | 1.066666667 | 1.03125     | 0.96969697  |
| EH domain-containing protein 2 OS=Mus musculus GN=Ehd2 PE=1 SV=1 EHD2_MOUSE                              | 61 kDa  | 1 | 21.753658 | 1           | 1.133333333 | 0.882352941 | 1.133333333 |
| Voltage-dependent anion-selective channel protein 2 (Fragment) OS=Mt G3UX26_MOUSE (+1)                   | 30 kDa  | 1 | 23.24543  | 1.066666667 | 1.2         | 0.888888889 | 1.125       |
| ATP synthase subunit delta, mitochondrial OS=Mus musculus GN=Atp5d ATPD_MOUSE                            | 18 kDa  | 1 | 22.777788 | 1.1         | 0.866666667 | 1.269230769 | 0.787878788 |
| Hemopexin OS=Mus musculus GN=Hpx PE=1 SV=2 HEMO_MOUSE                                                    | 51 kDa  | 1 | 21.900138 | 1           | 1.066666667 | 0.9375      | 1.066666667 |
| Cluster of NADH dehydrogenase [ubiquinone] flavoprotein 3, mitochondrion OS=Mus musculus NDUV3_MOUSE [2] | 12 kDa  | 1 | 26.060414 | 0.966666667 | 0.8         | 1.208333333 | 0.827586207 |
| Cluster of Murinoglobulin-1 OS=Mus musculus GN=Mug1 PE=1 SV=3 (MUG1_MOUSE [2])                           | 165 kDa | 1 | 30.218425 | 0.833333333 | 0.933333333 | 0.892857143 | 1.12        |
| Tripartite motif-containing protein 72 OS=Mus musculus GN=Trim72 PE=TRI72_MOUSE                          | 53 kDa  | 1 | 23.179765 | 1.066666667 | 0.933333333 | 1.142857143 | 0.875       |
| Cluster of Protein Neb OS=Mus musculus GN=Neb PE=2 SV=1 (A2AQA9_A2AQA9_MOUSE [3])                        | 801 kDa | 1 | 0         | #VALUE!     | #VALUE!     | #VALUE!     | #VALUE!     |
| Cluster of Hexokinase-2 OS=Mus musculus GN=Hk2 PE=1 SV=1 (HXK2_M HXK2_MOUSE)                             | 103 kDa | 1 | 20.551997 | 1           | 1.033333333 | 0.967741935 | 1.033333333 |
| Nucleolin OS=Mus musculus GN=Ncl PE=1 SV=2 NUC1_MOUSE                                                    | 77 kDa  | 1 | 21.239017 | 0.8041      | 0.833333333 | 0.96        | 1.041666667 |
| Serum deprivation-response protein OS=Mus musculus GN=Sdpr PE=1 SV=SDPR_MOUSE                            | 47 kDa  | 1 | 21.971652 | 1           | 0.933333333 | 1.071428571 | 0.933333333 |
| Cluster of Kininogen-1 OS=Mus musculus GN=Kng1 PE=1 SV=1 (KNG1_M KNG1_MOUSE [2])                         | 73 kDa  | 1 | 27.040312 | 0.933333333 | 0.9         | 1.037037037 | 0.964285714 |

|                                                                                           |              |         |   |           |            |            |             |             |
|-------------------------------------------------------------------------------------------|--------------|---------|---|-----------|------------|------------|-------------|-------------|
| Prohibitin-2 OS=Mus musculus GN=Phb2 PE=1 SV=1                                            | PHB2_MOUSE   | 33 kDa  | 1 | 20.787968 | 0.9        | 0.86666667 | 1.038461538 | 0.962962963 |
| 60S ribosomal protein L4 OS=Mus musculus GN=Rpl4 PE=1 SV=3                                | RL4_MOUSE    | 47 kDa  | 1 | 23.343958 | 0.9        | 1.03333333 | 0.870967742 | 1.148148148 |
| Cluster of Microtubule-associated protein (Fragment) OS=Mus musculus F7CK47_MOUSE [2]     |              | 153 kDa | 1 | 24.227646 | 1.03333333 | 0.9        | 1.148148148 | 0.870967742 |
| Cluster of Ras-related protein Rab-1B OS=Mus musculus GN=Rab1b PE=1RAB1B_MOUSE [7]        |              | 22 kDa  | 1 | 215.08331 | 1.03333333 | 1.1        | 0.939393939 | 1.064516129 |
| Endoplasmic reticulum chaperone protein OS=Mus musculus GN=Hsp90b1 PE=1 SV=2              | ENPL_MOUSE   | 92 kDa  | 1 | 21.536195 | 0.96666667 | 0.9        | 1.074074074 | 0.931034483 |
| Heat shock 70 kDa protein 4 OS=Mus musculus GN=Hspa4 PE=2 SV=1                            | Q3U2G2_MOUSE | 94 kDa  | 1 | 21.542004 | 0.85536667 | 0.93333333 | 0.928571429 | 1.076923077 |
| Protein-glutamine gamma-glutamyltransferase 2 OS=Mus musculus GN=TGM2_MOUSE               |              | 77 kDa  | 1 | 21.645275 | 1.06666667 | 1.1        | 0.96969697  | 1.03125     |
| Cluster of Carboxylesterase 1C OS=Mus musculus GN=Ces1c PE=1 SV=4 (EST1C_MOUSE [3])       |              | 61 kDa  | 1 | 28.846636 | 1.03333333 | 1.1        | 0.939393939 | 1.064516129 |
| NADH dehydrogenase [ubiquinone] 1 subunit C2 OS=Mus musculus GN=NDUC2_MOUSE               |              | 14 kDa  | 1 | 21.862963 | 1.03333333 | 1.1        | 0.939393939 | 1.064516129 |
| Cluster of Laminin subunit alpha-2 OS=Mus musculus GN=Lama2 PE=1 SV=1 (S\LAMA2_MOUSE [2]) |              | 343 kDa | 1 | 20.730539 | 0.7        | 0.93333333 | 0.75        | 1.33333333  |
| Cluster of Myosin-11 OS=Mus musculus GN=Myh11 PE=1 SV=1 (MYH11_MOUSE [2])                 |              | 227 kDa | 1 | 8.001554  | 1.05       | 0.95       | 1.105263158 | 0.904761905 |
| Cluster of Selenium-binding protein 1 OS=Mus musculus GN=Selenbp1 P SBP1_MOUSE [2]        |              | 53 kDa  | 1 | 22.65691  | 1.06666667 | 1.13333333 | 0.941176471 | 1.0625      |
| Cluster of Myosin light chain 4 (Fragment) OS=Mus musculus GN=Myl4 PA2A6Q8_MOUSE [3]      |              | 21 kDa  | 1 | 0         | 1          | 0.25       | 4           | 0.25        |
| Heterogeneous nuclear ribonucleoprotein M OS=Mus musculus GN=Hnr B8JK32_MOUSE (+3)        |              | 72 kDa  | 1 | 19.85611  | 0.96666667 | 1          | 0.96666667  | 1.034482759 |
| Phosphatidylethanolamine-binding protein 1 OS=Mus musculus GN=Peb D3Z1V4_MOUSE (+1)       |              | 23 kDa  | 1 | 27.034444 | 0.8        | 0.73333333 | 1.090909091 | 0.91666667  |
| NADH dehydrogenase [ubiquinone] 1 alpha subcomplex subunit 6 OS=MNDUA6_MOUSE              |              | 15 kDa  | 1 | 22.54544  | 1.1        | 1.03333333 | 1.064516129 | 0.939393939 |
| Peroxiredoxin-2 OS=Mus musculus GN=Prdx2 PE=1 SV=3                                        | PRDX2_MOUSE  | 22 kDa  | 1 | 20.521066 | 1.13333333 | 1.16666667 | 0.971428571 | 1.029411765 |
| Annexin A2 OS=Mus musculus GN=Anxa2 PE=1 SV=2                                             | ANXA2_MOUSE  | 39 kDa  | 1 | 21.187776 | 0.96666667 | 1          | 0.96666667  | 1.034482759 |
| Galectin-1 OS=Mus musculus GN=Lgals1 PE=1 SV=3                                            | LEG1_MOUSE   | 15 kDa  | 1 | 21.617624 | 0.9        | 0.96666667 | 0.931034483 | 1.074074074 |
| Acyl-CoA dehydrogenase family member 9, mitochondrial OS=Mus musculus ACAD9_MOUSE         |              | 69 kDa  | 1 | 21.001568 | 1.03333333 | 1.03333333 | 1           | 1           |
| NADH dehydrogenase [ubiquinone] 1 beta subcomplex subunit 10 OS=MNDUBA_MOUSE              |              | 21 kDa  | 1 | 24.455515 | 1.16666667 | 1.1        | 1.060606061 | 0.942857143 |
| von Willebrand factor A domain-containing protein 8 OS=Mus musculus VWA8_MOUSE            |              | 213 kDa | 1 | 21.46171  | 1          | 1          | 1           | 1           |
| Cluster of Enoyl-CoA delta isomerase 2, mitochondrial OS=Mus musculus EC12_MOUSE [5]      |              | 43 kDa  | 1 | 0         | #VALUE!    | #VALUE!    | #VALUE!     | #VALUE!     |
| Protein disulfide-isomerase OS=Mus musculus GN=P4hb PE=1 SV=2                             | PDI1_MOUSE   | 57 kDa  | 1 | 21.437772 | 0.8567     | 0.83333333 | 1.04        | 0.961538462 |
| Cluster of Ankyrin-2 OS=Mus musculus GN=Ank2 PE=1 SV=2 (ANK2_MOUSE [4])                   |              | 426 kDa | 1 | 0         | #VALUE!    | #VALUE!    | #VALUE!     | #VALUE!     |
| Perilipin-4 OS=Mus musculus GN=Plin4 PE=1 SV=2                                            | PLIN4_MOUSE  | 139 kDa | 1 | 19.081882 | 1.1        | 1.1        | 1           | 1           |
| Tropomodulin-1 OS=Mus musculus GN=Tmod1 PE=2 SV=2                                         | TMOD1_MOUSE  | 40 kDa  | 1 | 22.36374  | 0.93333333 | 0.93333333 | 1           | 1           |
| Cluster of D-beta-hydroxybutyrate dehydrogenase, mitochondrial OS=MDH_MOUSE [2]           |              | 38 kDa  | 1 | 22.139552 | 0.73333333 | 0.66666667 | 1.1         | 0.909090909 |
| Creatine kinase B-type OS=Mus musculus GN=Ckb PE=1 SV=1                                   | KCRB_MOUSE   | 43 kDa  | 1 | 25.364146 | 1.03333333 | 1.16666667 | 0.885714286 | 1.129032258 |
| Chaperone activity of bc1 complex-like, mitochondrial OS=Mus musculus ADCK3_MOUSE         |              | 72 kDa  | 1 | 22.790584 | 1.06666667 | 1.06666667 | 1           | 1           |
| Cluster of Protein Tns1 OS=Mus musculus GN=Tns1 PE=2 SV=1 (E9Q0S6_MOUSE [2])              |              | 201 kDa | 1 | 22.13987  | 1          | 1          | 1           | 1           |
| Striated muscle-specific serine/threonine-protein kinase OS=Mus musculus E9Q0Q25_MOUSE    |              | 354 kDa | 1 | 22.692575 | 1          | 1          | 1           | 1           |
| 60S ribosomal protein L6 OS=Mus musculus GN=Rpl6 PE=1 SV=3                                | RL6_MOUSE    | 34 kDa  | 1 | 21.481863 | 0.96666667 | 0.96666667 | 1           | 1           |
| Nesprin-2 OS=Mus musculus GN=Syne2 PE=1 SV=2                                              | SYNE2_MOUSE  | 783 kDa | 1 | 9.591509  | 1          | 1.3        | 0.769230769 | 1.3         |
| Cluster of Glutathione S-transferase omega-1 OS=Mus musculus GN=Gst GSTO1_MOUSE           |              | 27 kDa  | 1 | 20.586726 | 0.7771     | 0.7        | 1.095238095 | 0.913043478 |
| Cluster of Calpastatin OS=Mus musculus GN=Cast PE=1 SV=2 (ICAL_MOUSE [3])                 |              | 85 kDa  | 1 | 22.758579 | 0.9        | 0.8        | 1.125       | 0.888888889 |
| Non-specific lipid-transfer protein OS=Mus musculus GN=Scp2 PE=1 SV=1 (NLTP_MOUSE)        |              | 59 kDa  | 1 | 20.306158 | 0.9        | 0.96666667 | 0.931034483 | 1.074074074 |
| Calcium-binding mitochondrial carrier protein Aralar2 OS=Mus musculus CMC2_MOUSE          |              | 74 kDa  | 1 | 20.084044 | 1.03333333 | 1.13333333 | 0.911764706 | 1.096774194 |
| Cysteine-rich protein 2 OS=Mus musculus GN=Crip2 PE=1 SV=1                                | CRIP2_MOUSE  | 23 kDa  | 1 | 50.443006 | 0.86666667 | 0.76666667 | 1.130434783 | 0.884615385 |
| Uncharacterized protein OS=Mus musculus GN=Rps3a2 PE=3 SV=1                               | D3Z6C3_MOUSE | 30 kDa  | 1 | 21.281977 | 0.93333333 | 1          | 0.93333333  | 1.071428571 |
| Glutamate dehydrogenase 1, mitochondrial OS=Mus musculus GN=Glud DHE3_MOUSE               |              | 61 kDa  | 1 | 20.491561 | 1          | 1.06666667 | 0.9375      | 1.06666667  |
| Cluster of Catenin alpha-1 OS=Mus musculus GN=Ctnna1 PE=1 SV=1 (CTCTNA1_MOUSE)            |              | 100 kDa | 1 | 20.310375 | 1.03333333 | 0.9        | 1.148148148 | 0.870967742 |
| Nexilin OS=Mus musculus GN=Nexn PE=1 SV=3                                                 | NEXN_MOUSE   | 72 kDa  | 1 | 20.709956 | 0.93333333 | 1.03333333 | 0.903225806 | 1.107142857 |
| Cluster of Talin-2 OS=Mus musculus GN=Tln2 PE=4 SV=1 (E9PUM4_MOUSE [2])                   |              | 272 kDa | 1 | 6.36418   | 0.95       | 1.05       | 0.904761905 | 1.105263158 |
| NADH dehydrogenase [ubiquinone] 1 alpha subcomplex subunit 13 OS=MNDUAD_MOUSE             |              | 17 kDa  | 1 | 26.50013  | 1          | 1          | 1           | 1           |
| Phosphoglucomutase-like protein 5 OS=Mus musculus GN=Pgm5 PE=1 SV=1 (S\PGM5_MOUSE)        |              | 62 kDa  | 1 | 20.74933  | 1          | 1.03333333 | 0.967741935 | 1.03333333  |
| Cluster of Dynamin-like 120 kDa protein, mitochondrial OS=Mus musculus H7BX01_MOUSE [3]   |              | 113 kDa | 1 | 21.181275 | 0.96666667 | 1.03333333 | 0.935483871 | 1.068965517 |
| Heat shock protein HSP 90-alpha OS=Mus musculus GN=Hsp90aa1 PE=1 SV=1 (HS90A_MOUSE)       |              | 85 kDa  | 1 | 23.751697 | 0.78323333 | 0.9        | 0.851851852 | 1.173913043 |
| Protein Agl OS=Mus musculus GN=Agl PE=4 SV=1                                              | F8VFN4_MOUSE | 174 kDa | 1 | 21.163423 | 1.1293     | 1.13333333 | 0.970588235 | 1.03030303  |
| Plasminogen activator inhibitor 1 RNA-binding protein OS=Mus musculus PAIRB_MOUSE         |              | 45 kDa  | 1 | 19.4952   | 0.86666667 | 0.86666667 | 1           | 1           |
| Propionyl-CoA carboxylase beta chain, mitochondrial OS=Mus musculus PCCB_MOUSE            |              | 58 kDa  | 1 | 22.003977 | 0.96666667 | 1.03333333 | 0.935483871 | 1.068965517 |
| Laminin subunit beta-1 OS=Mus musculus GN=Lamb1 PE=2 SV=1                                 | E9QN70_MOUSE | 202 kDa | 1 | 22.540122 | 1.06666667 | 1.03333333 | 1.032258065 | 0.96875     |
| Lumican OS=Mus musculus GN=Lum PE=1 SV=2                                                  | LUM_MOUSE    | 38 kDa  | 1 | 22.302015 | 0.86666667 | 0.93333333 | 0.928571429 | 1.076923077 |

|                                                                                                              |                    |         |   |           |             |             |             |             |
|--------------------------------------------------------------------------------------------------------------|--------------------|---------|---|-----------|-------------|-------------|-------------|-------------|
| Filamin, alpha OS=Mus musculus GN=Flna PE=4 SV=1                                                             | B7FAU9_MOUSE (+2)  | 280 kDa | 1 | 20.803203 | 1.033333333 | 0.933333333 | 1.107142857 | 0.903225806 |
| Cluster of MCG5732 OS=Mus musculus GN=Gm4978 PE=4 SV=2 (F6VBB8 F6VBB8_MOUSE [5])                             |                    | 30 kDa  | 1 | 0         | 1.2         | 1.1         | 1.090909091 | 0.916666667 |
| Acyl-coenzyme A thioesterase 13 OS=Mus musculus GN=Acot13 PE=1 SV=1 (ACO13_MOUSE)                            |                    | 15 kDa  | 1 | 22.309871 | 1.066666667 | 1.033333333 | 1.032258065 | 0.96875     |
| Cluster of 40S ribosomal protein S4, X isoform OS=Mus musculus GN=RpRS4X_MOUSE [3]                           |                    | 30 kDa  | 1 | 0         | 0.9         | 1.066666667 | 0.84375     | 1.185185185 |
| Calmodulin OS=Mus musculus GN=Calm1 PE=1 SV=2                                                                | CALM_MOUSE (+1)    | 17 kDa  | 1 | 24.645248 | 1           | 0.933333333 | 1.071428571 | 0.933333333 |
| Protein Fga OS=Mus musculus GN=Fga PE=2 SV=1                                                                 | E9PV24_MOUSE (+1)  | 87 kDa  | 1 | 21.172126 | 1           | 1.033333333 | 0.967741935 | 1.033333333 |
| Protein Col6a3 OS=Mus musculus GN=Col6a3 PE=4 SV=2                                                           | E9PWQ3_MOUSE       | 354 kDa | 1 | 23.593284 | 1.366666667 | 1.066666667 | 1.28125     | 0.780487805 |
| Histone H1.0 OS=Mus musculus GN=H1f0 PE=2 SV=4                                                               | H10_MOUSE          | 21 kDa  | 1 | 20.203805 | 1.033333333 | 1.2         | 0.861111111 | 1.161290323 |
| NADH dehydrogenase [ubiquinone] 1 beta subcomplex subunit 9 OS=Mus musculus GN=NDUB9_MOUSE                   |                    | 22 kDa  | 1 | 25.329214 | 1.1         | 1.133333333 | 0.970588235 | 1.03030303  |
| Heat shock protein beta-6 OS=Mus musculus GN=Hspb6 PE=1 SV=1                                                 | HSPB6_MOUSE        | 18 kDa  | 1 | 20.452799 | 0.866666667 | 0.8         | 1.083333333 | 0.923076923 |
| Methylcrotonyl-CoA carboxylase subunit alpha, mitochondrial OS=Mus musculus GN=MCCA_MOUSE                    |                    | 79 kDa  | 1 | 21.662836 | 1.1         | 1.133333333 | 0.970588235 | 1.03030303  |
| NADH dehydrogenase [ubiquinone] iron-sulfur protein 5 OS=Mus musculus GN=NDUS5_MOUSE                         |                    | 13 kDa  | 1 | 21.68276  | 1.033333333 | 0.9         | 1.148148148 | 0.870967742 |
| ATP synthase subunit epsilon, mitochondrial OS=Mus musculus GN=Atp5E_MOUSE                                   |                    | 6 kDa   | 1 | 27.739382 | 0.8         | 1.066666667 | 0.75        | 1.333333333 |
| Platelet glycoprotein 4 OS=Mus musculus GN=Cd36 PE=1 SV=2                                                    | CD36_MOUSE         | 53 kDa  | 1 | 21.855485 | 1.133333333 | 1.233333333 | 0.918918919 | 1.088235294 |
| Ig kappa chain C region OS=Mus musculus PE=1 SV=1                                                            | IGKC_MOUSE         | 12 kDa  | 1 | 22.266749 | 0.966666667 | 0.8         | 1.208333333 | 0.827586207 |
| Protein phosphatase 1 regulatory subunit 12B OS=Mus musculus GN=PpMYPT2_MOUSE                                |                    | 109 kDa | 1 | 21.341872 | 1           | 0.966666667 | 1.034482759 | 0.966666667 |
| Cluster of Protein Pabpc6 OS=Mus musculus GN=Pabpc6 PE=2 SV=1 (Q9IQ9D4E6_MOUSE [4])                          |                    | 71 kDa  | 1 | 0         | #VALUE!     | #VALUE!     | #VALUE!     | #VALUE!     |
| Alpha-2-HS-glycoprotein OS=Mus musculus GN=Ahsg PE=1 SV=1                                                    | FETUA_MOUSE        | 37 kDa  | 1 | 20.93477  | 0.9         | 0.8         | 1.125       | 0.888888889 |
| 3-hydroxyacyl-CoA dehydrogenase type-2 OS=Mus musculus GN=Hsd17A2AFQ2_MOUSE (+1)                             |                    | 28 kDa  | 1 | 29.58014  | 1.033333333 | 1.066666667 | 0.96875     | 1.032258065 |
| Sodium/potassium-transporting ATPase subunit beta-1 OS=Mus musculus GN=AT1B1_MOUSE                           |                    | 35 kDa  | 1 | 21.883778 | 1.1         | 1.166666667 | 0.942857143 | 1.060606061 |
| Cluster of Catalase OS=Mus musculus GN=Cat PE=1 SV=4 (CATA_MOUSE CATA_MOUSE [2])                             |                    | 60 kDa  | 1 | 28.947672 | 0.933333333 | 0.9         | 1.037037037 | 0.964285714 |
| Cluster of Protein Gm10923 OS=Mus musculus GN=Gm10923 PE=3 SV=1 (D3YU46_MOUSE [4])                           |                    | 17 kDa  | 1 | 0         | 0.5         | 0.3         | 1.666666667 | 0.6         |
| High mobility group protein B1 OS=Mus musculus GN=Hmgb1 PE=1 SV=2 (HMGB1_MOUSE)                              |                    | 25 kDa  | 1 | 21.463308 | 0.9         | 1           | 0.9         | 1.111111111 |
| Methylcrotonyl-CoA carboxylase beta chain, mitochondrial OS=Mus musculus GN=MCCB_MOUSE                       |                    | 61 kDa  | 1 | 22.032514 | 1.033333333 | 1.133333333 | 0.911764706 | 1.096774194 |
| Protein NDRG2 OS=Mus musculus GN=NDRG2 PE=1 SV=1                                                             | NDRG2_MOUSE        | 41 kDa  | 1 | 20.763037 | 1           | 1           | 1           | 1           |
| Cluster of NADH dehydrogenase [ubiquinone] 1 beta subcomplex subunit 5 OS=Mus musculus GN=NDUB5_MOUSE [2]    |                    | 22 kDa  | 1 | 17.698397 | 1.1         | 1.133333333 | 0.970588235 | 1.03030303  |
| ATPase inhibitor, mitochondrial OS=Mus musculus GN=Atpif1 PE=2 SV=1 (E9PV44_MOUSE)                           |                    | 9 kDa   | 1 | 24.242947 | 0.833333333 | 0.633333333 | 1.315789474 | 0.76        |
| Cluster of Hmgn2 protein OS=Mus musculus GN=Hmgn2 PE=4 SV=1 (Q5Q5XK38_MOUSE [2])                             |                    | 10 kDa  | 1 | 23.643467 | 1.2         | 0.7         | 1.714285714 | 0.583333333 |
| Cluster of Microtubule-associated protein tau OS=Mus musculus GN=MaA2A5Y6_MOUSE [4]                          |                    | 78 kDa  | 1 | 19.519179 | 0.966666667 | 0.933333333 | 1.035714286 | 0.965517241 |
| Carbonic anhydrase 2 OS=Mus musculus GN=Ca2 PE=1 SV=4                                                        | CAH2_MOUSE         | 29 kDa  | 1 | 20.31361  | 1.033333333 | 1.066666667 | 0.96875     | 1.032258065 |
| Protein Golgb1 OS=Mus musculus GN=Golgb1 PE=2 SV=1                                                           | E9QAHI_MOUSE       | 365 kDa | 1 | 7.870448  | 1           | 1.15        | 0.869565217 | 1.15        |
| Adenosine kinase OS=Mus musculus GN=Adk PE=1 SV=2                                                            | ADK_MOUSE (+1)     | 40 kDa  | 1 | 21.712993 | 1.033333333 | 1           | 1.033333333 | 0.967741935 |
| Cluster of Uncharacterized protein OS=Mus musculus GN=Gm5611 PE=4 SV=1 (E9Q5T3_MOUSE [2])                    |                    | 30 kDa  | 1 | 19.239469 | 0.9         | 0.933333333 | 0.964285714 | 1.037037037 |
| NADH dehydrogenase [ubiquinone] 1 alpha subcomplex subunit 5 OS=Mus musculus GN=MNDUA5_MOUSE                 |                    | 13 kDa  | 1 | 21.889487 | 1.033333333 | 1.033333333 | 1           | 1           |
| Cluster of sp K1C9_HUMAN                                                                                     | sp K1C9_HUMAN  [2] | ?       | 1 | 26.650304 | 1.266666667 | 1.433333333 | 0.88372093  | 1.131578947 |
| Natriuretic peptides A OS=Mus musculus GN=Nppa PE=1 SV=2                                                     | ANF_MOUSE          | 17 kDa  | 1 | 21.745609 | 0.7         | 0.8         | 0.875       | 1.142857143 |
| Cluster of Antithrombin-III OS=Mus musculus GN=Serpinc1 PE=1 SV=1 (AANT3_MOUSE)                              |                    | 52 kDa  | 1 | 23.352383 | 0.9         | 0.933333333 | 0.964285714 | 1.037037037 |
| ATP synthase subunit e, mitochondrial OS=Mus musculus GN=Atp5i PE=1 SV=1 (ATP5I_MOUSE)                       |                    | 8 kDa   | 1 | 27.29676  | 1           | 0.9         | 1.111111111 | 0.9         |
| 14 kDa phosphohistidine phosphatase OS=Mus musculus GN=Phpt1 PE=1 SV=1 (PHP14_MOUSE)                         |                    | 14 kDa  | 1 | 20.79367  | 1.033333333 | 1.033333333 | 1           | 1           |
| Transaldolase OS=Mus musculus GN=Taldo1 PE=1 SV=2                                                            | TALDO_MOUSE        | 37 kDa  | 1 | 19.607647 | 0.966666667 | 1.033333333 | 0.935483871 | 1.068965517 |
| Cluster of Basigin OS=Mus musculus GN=Bsg PE=1 SV=2 (BASI_MOUSE) BASI_MOUSE [3]                              |                    | 42 kDa  | 1 | 0         | 1           | 1.15        | 0.869565217 | 1.15        |
| Cluster of Kinectin OS=Mus musculus GN=Ktn1 PE=2 SV=1 (F8VQC7_MOUSE) MOI1F8VQC7_MOUSE [2]                    |                    | 153 kDa | 1 | 0         | 1.1         | 1           | 1.1         | 0.909090909 |
| Proteasome activator complex subunit 1 (Fragment) OS=Mus musculus GN=G3UXZ5_MOUSE (+1)                       |                    | 27 kDa  | 1 | 21.807472 | 1.2         | 1.133333333 | 1.058823529 | 0.944444444 |
| 60S ribosomal protein L3 OS=Mus musculus GN=Rpl3 PE=2 SV=3                                                   | RL3_MOUSE          | 46 kDa  | 1 | 7.8879684 | 0.8         | 0.8         | 1           | 1           |
| Cluster of Heterogeneous nuclear ribonucleoprotein K OS=Mus musculus GN=B2M1R6_MOUSE [4]                     |                    | 49 kDa  | 1 | 19.67724  | 0.933333333 | 1           | 0.933333333 | 1.071428571 |
| Cofilin-1 OS=Mus musculus GN=Cfl1 PE=1 SV=3                                                                  | COF1_MOUSE (+1)    | 19 kDa  | 1 | 21.811543 | 0.766666667 | 0.9         | 0.851851852 | 1.173913043 |
| DNA polymerase theta OS=Mus musculus GN=Polq PE=2 SV=1                                                       | Q80XB7_MOUSE       | 281 kDa | 1 | 0         | 2           | 1.8         | 1.111111111 | 0.9         |
| Cluster of Serine/threonine-protein phosphatase 2A 65 kDa regulatory subunit 1 OS=Mus musculus GN=PP2A_MOUSE |                    | 65 kDa  | 1 | 19.637708 | 1.033333333 | 1.1         | 0.939393939 | 1.064516129 |
| Cluster of Methylglutaconyl-CoA hydratase, mitochondrial OS=Mus musculus GN=AUHM_MOUSE [2]                   |                    | 33 kDa  | 1 | 14.166689 | 1.066666667 | 1.133333333 | 0.941176471 | 1.0625      |
| Cluster of CAP-Gly domain-containing linker protein 1 (Fragment) OS=Mus musculus GN=MtF7CB97_MOUSE [5]       |                    | 136 kDa | 1 | 0         | #VALUE!     | #VALUE!     | #VALUE!     | #VALUE!     |
| Cluster of Cathepsin D OS=Mus musculus GN=Ctsd PE=1 SV=1 (CATD_MOUSE) CATD_MOUSE [2]                         |                    | 45 kDa  | 1 | 20.738965 | 0.8         | 1           | 0.8         | 1.25        |
| WD repeat-containing protein 1 OS=Mus musculus GN=Wdr1 PE=1 SV=3 (WDR1_MOUSE)                                |                    | 66 kDa  | 1 | 19.96053  | 0.966666667 | 0.933333333 | 1.035714286 | 0.965517241 |
| Serine-rich coiled-coil domain-containing protein 1 OS=Mus musculus GN=CCSE1_MOUSE                           |                    | 98 kDa  | 1 | 8.25609   | 0.9         | 0.8         | 1.125       | 0.888888889 |

|                                                                                                     |                   |         |   |           |             |            |             |             |
|-----------------------------------------------------------------------------------------------------|-------------------|---------|---|-----------|-------------|------------|-------------|-------------|
| Destrin OS=Mus musculus GN=Dstn PE=1 SV=3                                                           | DEST_MOUSE        | 19 kDa  | 1 | 21.482916 | 0.933333333 | 1.06666667 | 0.875       | 1.142857143 |
| Fibrous sheath-interacting protein 2 OS=Mus musculus GN=Fsp2 PE=1 S'FSIP2_MOUSE                     |                   | 785 kDa | 1 | 0         | 1           | 1          | 1           | 1           |
| GrpE protein homolog 1, mitochondrial OS=Mus musculus GN=Grpel1 PEGRPE1_MOUSE                       |                   | 24 kDa  | 1 | 20.165342 | 0.9         | 0.96666667 | 0.931034483 | 1.074074074 |
| O-acetyl-ADP-ribose deacetylase MACROD1 OS=Mus musculus GN=Macr MACD1_MOUSE                         |                   | 35 kDa  | 1 | 22.148654 | 1           | 1.23333333 | 0.810810811 | 1.233333333 |
| Isoleucine--tRNA ligase, mitochondrial OS=Mus musculus GN=lars2 PE=2 SYIM_MOUSE                     |                   | 113 kDa | 1 | 20.477945 | 1           | 1.03333333 | 0.967741935 | 1.033333333 |
| Beta-taxilin OS=Mus musculus GN=Txlnb PE=2 SV=2                                                     | TXLNB_MOUSE       | 77 kDa  | 1 | 20.961753 | 0.966666667 | 1.06666667 | 0.90625     | 1.103448276 |
| AFG3-like protein 2 OS=Mus musculus GN=Afg3l2 PE=1 SV=1                                             | AFG32_MOUSE       | 90 kDa  | 1 | 20.113319 | 0.8884      | 0.9        | 1           | 1           |
| Cluster of MCG142036 OS=Mus musculus GN=Acad12 PE=3 SV=1 (D3Z7XD3Z7X0_MOUSE [2]                     |                   | 61 kDa  | 1 | 13.195859 | 1.133333333 | 1.1        | 1.03030303  | 0.970588235 |
| Dynamin-1-like protein OS=Mus musculus GN=Dnm1l PE=1 SV=2                                           | DNM1L_MOUSE (+1)  | 83 kDa  | 1 | 20.436788 | 1           | 1.03333333 | 0.967741935 | 1.033333333 |
| Cluster of Uncharacterized protein OS=Mus musculus GN=Gm18025 PE=E9Q1N8_MOUSE [5]                   |                   | 29 kDa  | 1 | 0         | #VALUE!     | #VALUE!    | #VALUE!     | #VALUE!     |
| Protein Myh15 OS=Mus musculus GN=Myh15 PE=4 SV=1                                                    | E9Q264_MOUSE      | 222 kDa | 1 | 27.720067 | 1.333333333 | 1.23333333 | 1.081081081 | 0.925       |
| Cluster of Gelsolin OS=Mus musculus GN=Gsn PE=1 SV=3 (GELS_MOUSE)GELS_MOUSE                         |                   | 86 kDa  | 1 | 21.374686 | 0.833333333 | 0.93333333 | 0.892857143 | 1.12        |
| Cluster of Glutathione S-transferase A4 OS=Mus musculus GN=Gsta4 PE=GSTA4_MOUSE [3]                 |                   | 26 kDa  | 1 | 27.96852  | 0.933333333 | 1.03333333 | 0.903225806 | 1.107142857 |
| Hydroxysteroid dehydrogenase-like protein 2 OS=Mus musculus GN=HscHSDL2_MOUSE                       |                   | 54 kDa  | 1 | 21.3858   | 0.966666667 | 1          | 0.966666667 | 1.034482759 |
| Adenylate kinase 2, mitochondrial OS=Mus musculus GN=AK2 PE=1 SV=5 KAD2_MOUSE                       |                   | 26 kDa  | 1 | 20.725907 | 0.966666667 | 0.96666667 | 1           | 1           |
| Ubiquitin-conjugating enzyme E2 N OS=Mus musculus GN=Ube2n PE=1 UBE2N_MOUSE                         |                   | 17 kDa  | 1 | 21.930379 | 0.9         | 1          | 0.9         | 1.111111111 |
| Lactoylglutathione lyase OS=Mus musculus GN=Glo1 PE=1 SV=3                                          | LGUL_MOUSE        | 21 kDa  | 1 | 21.034554 | 0.9         | 0.93333333 | 0.964285714 | 1.037037037 |
| NADH dehydrogenase [ubiquinone] 1 beta subcomplex subunit 7 OS=Mus musculus GN=NDUB7_MOUSE          |                   | 16 kDa  | 1 | 30.42457  | 1.2         | 1.2        | 1           | 1           |
| Cluster of Mitogen-activated protein kinase 12 OS=Mus musculus GN=M MK12_MOUSE [2]                  |                   | 42 kDa  | 1 | 8.3054796 | 1.15        | 1.1        | 1.045454545 | 0.956521739 |
| Aspartyl/asparaginyl beta-hydroxylase OS=Mus musculus GN=Asph PE=2 A2AL78_MOUSE                     |                   | 26 kDa  | 1 | 20.37548  | 1.033333333 | 0.96666667 | 1.068965517 | 0.935483871 |
| Band 3 anion transport protein OS=Mus musculus GN=Slc4a1 PE=1 SV=1 B3AT_MOUSE (+1)                  |                   | 103 kDa | 1 | 20.700495 | 1.266666667 | 1.16666667 | 1.085714286 | 0.921052632 |
| CDGSH iron-sulfur domain-containing protein 1 OS=Mus musculus GN=C CISD1_MOUSE                      |                   | 12 kDa  | 1 | 20.30046  | 1.1         | 1.16666667 | 0.942857143 | 1.060606061 |
| Band 4.1-like protein 2 OS=Mus musculus GN=Epb4l2 PE=1 SV=2                                         | E41L2_MOUSE       | 110 kDa | 1 | 39.748502 | 1.3         | 1.23333333 | 1.054054054 | 0.948717949 |
| Cluster of Protein Cald1 OS=Mus musculus GN=Cald1 PE=2 SV=1 (E9QA1 E9QA15_MOUSE [2]                 |                   | 89 kDa  | 1 | 30.69873  | 0.9         | 0.73333333 | 1.227272727 | 0.814814815 |
| Eukaryotic translation initiation factor 3 subunit A OS=Mus musculus GN=EIF3A_MOUSE                 |                   | 162 kDa | 1 | 23.554555 | 0.866666667 | 0.86666667 | 1           | 1           |
| Cluster of Kinesin-1 heavy chain OS=Mus musculus GN=Kif5b PE=1 SV=3 KINH_MOUSE                      |                   | 110 kDa | 1 | 29.820034 | 1.033333333 | 0.9        | 1.148148148 | 0.870967742 |
| Spectrin beta 1 OS=Mus musculus GN=Sptb PE=2 SV=1                                                   | Q3UGX2_MOUSE      | 268 kDa | 1 | 23.465471 | 1.066666667 | 1.1        | 0.96969697  | 1.03125     |
| Cluster of Thioredoxin OS=Mus musculus GN=Txn PE=1 SV=3 (THIO_MOUSE)THIO_MOUSE                      |                   | 12 kDa  | 1 | 25.592077 | 0.9         | 1          | 0.9         | 1.111111111 |
| Cluster of Acidic leucine-rich nuclear phosphoprotein 32 family member AN32A_MOUSE [3]              |                   | 29 kDa  | 1 | 29.564816 | 1           | 0.9        | 1.111111111 | 0.9         |
| Branched-chain-amino-acid aminotransferase, mitochondrial OS=Mus musculus GN=BCAT2_MOUSE            |                   | 44 kDa  | 1 | 22.588815 | 0.866666667 | 0.9        | 0.962962963 | 1.038461538 |
| Xin actin-binding repeat-containing protein 1 OS=Mus musculus GN=Xirp E9QQ93_MOUSE                  |                   | 124 kDa | 1 | 21.231122 | 0.866666667 | 0.8        | 1.083333333 | 0.923076923 |
| Protein unc-45 homolog B OS=Mus musculus GN=Unc45b PE=1 SV=1                                        | UN45B_MOUSE       | 104 kDa | 1 | 21.598138 | 0.9         | 1.06666667 | 0.84375     | 1.185185185 |
| Vigilin OS=Mus musculus GN=Hdlbp PE=1 SV=1                                                          | VIGLN_MOUSE       | 142 kDa | 1 | 14.61967  | 1.1         | 1.03333333 | 1.064516129 | 0.939393939 |
| Isocitrate dehydrogenase [NADP] cytoplasmic OS=Mus musculus GN=IdhIDHC_MOUSE                        |                   | 47 kDa  | 1 | 21.648483 | 1.2         | 1.1        | 1.090909091 | 0.916666667 |
| LETM1 and EF-hand domain-containing protein 1, mitochondrial OS=Mus musculus GN=LETM1_MOUSE         |                   | 83 kDa  | 1 | 23.618585 | 1.066666667 | 1.1        | 0.96969697  | 1.03125     |
| NADH dehydrogenase [ubiquinone] iron-sulfur protein 7, mitochondrial OS=Mus musculus GN=NDUS7_MOUSE |                   | 25 kDa  | 1 | 20.107381 | 1.033333333 | 1.1        | 0.939393939 | 1.064516129 |
| Ornithine aminotransferase, mitochondrial OS=Mus musculus GN=Oat P OAT_MOUSE                        |                   | 48 kDa  | 1 | 22.667679 | 0.966666667 | 0.96666667 | 1           | 1           |
| Cluster of 40S ribosomal protein S9 OS=Mus musculus GN=Rps9 PE=2 SV RS9_MOUSE [4]                   |                   | 23 kDa  | 1 | 20.292385 | 1.133333333 | 1.23333333 | 0.918918919 | 1.088235294 |
| Succinate-semialdehyde dehydrogenase, mitochondrial OS=Mus musculus GN=SSDH_MOUSE                   |                   | 56 kDa  | 1 | 21.072468 | 1.033333333 | 1.1        | 0.939393939 | 1.064516129 |
| Acylophosphatase-2 OS=Mus musculus GN=Acyp2 PE=2 SV=2                                               | ACYP2_MOUSE       | 12 kDa  | 1 | 23.077793 | 1.066666667 | 0.9        | 1.185185185 | 0.84375     |
| Cluster of Caveolin-3 OS=Mus musculus GN=Cav3 PE=1 SV=1 (CAV3_MOUSE)CAV3_MOUSE [3]                  |                   | 17 kDa  | 1 | 0         | #VALUE!     | #VALUE!    | #VALUE!     | #VALUE!     |
| DnaJ homolog subfamily A member 2 OS=Mus musculus GN=Dnaja2 PE=DNJA2_MOUSE                          |                   | 46 kDa  | 1 | 20.327157 | 0.933333333 | 0.96666667 | 0.965517241 | 1.035714286 |
| Myosin-14 OS=Mus musculus GN=Myh14 PE=4 SV=1                                                        | K3W4R2_MOUSE (+1) | 229 kDa | 1 | 23.060788 | 1.066666667 | 1.13333333 | 0.941176471 | 1.0625      |
| Amine oxidase [flavin-containing] B OS=Mus musculus GN=Maob PE=1 S'AOFB_MOUSE                       |                   | 59 kDa  | 1 | 20.96426  | 1.233333333 | 1.43333333 | 0.860465116 | 1.162162162 |
| Protein Lmo7 OS=Mus musculus GN=Lmo7 PE=2 SV=1                                                      | E9PYF4_MOUSE      | 193 kDa | 1 | 21.196204 | 1.033333333 | 1.03333333 | 1           | 1           |
| Fibrinogen beta chain OS=Mus musculus GN=Fgb PE=2 SV=1                                              | FIBB_MOUSE        | 55 kDa  | 1 | 20.901106 | 1           | 1          | 1           | 1           |
| Glutathione S-transferase P 1 OS=Mus musculus GN=Gstp1 PE=1 SV=2                                    | GSTP1_MOUSE       | 24 kDa  | 1 | 22.094472 | 0.966666667 | 1.03333333 | 0.935483871 | 1.068965517 |
| Puromycin-sensitive aminopeptidase OS=Mus musculus GN=Npepps PE=PSA_MOUSE                           |                   | 103 kDa | 1 | 21.59204  | 1.066666667 | 1.2        | 0.888888889 | 1.125       |
| Regulator of microtubule dynamics protein 1 OS=Mus musculus GN=Rm1 RMD1_MOUSE                       |                   | 35 kDa  | 1 | 21.094505 | 1           | 1.16666667 | 0.857142857 | 1.166666667 |
| Dihydropyrimidinase-related protein 2 OS=Mus musculus GN=Dpysl2 PE=DPYL2_MOUSE                      |                   | 62 kDa  | 1 | 22.084574 | 0.933333333 | 0.96666667 | 0.965517241 | 1.035714286 |
| Cluster of Ceruloplasmin OS=Mus musculus GN=Cp PE=4 SV=1 (G3X8Q5_G3X8Q5_MOUSE [4]                   |                   | 124 kDa | 1 | 44.992045 | 0.766666667 | 0.83333333 | 0.92        | 1.086956522 |
| Glutathione S-transferase kappa 1 OS=Mus musculus GN=Gstk1 PE=1 SV GSTK1_MOUSE                      |                   | 26 kDa  | 1 | 21.262702 | 1.1         | 1.2        | 0.916666667 | 1.090909091 |
| Cluster of Sarcolemmal membrane-associated protein OS=Mus musculus GN=H7BX64_MOUSE [3]              |                   | 95 kDa  | 1 | 0         | 0.9         | 0.95       | 0.947368421 | 1.055555556 |



|                                                                                                        |         |   |           |             |             |             |             |
|--------------------------------------------------------------------------------------------------------|---------|---|-----------|-------------|-------------|-------------|-------------|
| Mitochondrial carnitine/acylcarnitine carrier protein OS=Mus musculus (MCAT_MOUSE                      | 33 kDa  | 1 | 21.43621  | 1.1         | 1.2         | 0.916666667 | 1.090909091 |
| Methylmalonyl-CoA mutase, mitochondrial OS=Mus musculus GN=Mut f MUTA_MOUSE                            | 83 kDa  | 1 | 23.142092 | 1.066666667 | 1.133333333 | 0.941176471 | 1.0625      |
| Proteasome subunit alpha type-1 OS=Mus musculus GN=Psm1 PE=1 SV PSA1_MOUSE                             | 30 kDa  | 1 | 21.214527 | 0.866666667 | 0.933333333 | 0.928571429 | 1.076923077 |
| Spectrin alpha chain, erythrocytic 1 OS=Mus musculus GN=Spta1 PE=2 SV SPTA1_MOUSE                      | 280 kDa | 1 | 22.224896 | 1.033333333 | 0.966666667 | 1.068965517 | 0.935483871 |
| Short/branched chain specific acyl-CoA dehydrogenase, mitochondrial O ACDSB_MOUSE                      | 48 kDa  | 1 | 20.524439 | 1.166666667 | 1.166666667 | 1           | 1           |
| Apolipoprotein A-IV OS=Mus musculus GN=Apoa4 PE=2 SV=3 APOA4_MOUSE                                     | 45 kDa  | 1 | 20.295446 | 1.033333333 | 1           | 1.033333333 | 0.967741935 |
| Cluster of F-actin-capping protein subunit beta OS=Mus musculus GN=Cc CAPZB_MOUSE [2]                  | 31 kDa  | 1 | 0         | 1.033333333 | 1           | 1.033333333 | 0.967741935 |
| Cofilin-2 OS=Mus musculus GN=Cfl2 PE=1 SV=1 COF2_MOUSE                                                 | 19 kDa  | 1 | 19.80154  | 0.817533333 | 0.766666667 | 1.043478261 | 0.958333333 |
| Phospholipid hydroperoxide glutathione peroxidase, nuclear OS=Mus musculus GN=GPX42_MOUSE (+1)         | 29 kDa  | 1 | 20.668325 | 0.966666667 | 0.933333333 | 1.035714286 | 0.965517241 |
| Decorin OS=Mus musculus GN=Dcn PE=2 SV=1 PGS2_MOUSE                                                    | 40 kDa  | 1 | 19.844672 | 1           | 1           | 1           | 1           |
| Ryanodine receptor 3 OS=Mus musculus GN=Ryr3 PE=1 SV=1 RYR3_MOUSE (+1)                                 | 551 kDa | 1 | 0         | 1           | 1.1         | 0.909090909 | 1.1         |
| Tropomyosin alpha-4 chain OS=Mus musculus GN=Tpm4 PE=2 SV=3 TPM4_MOUSE                                 | 28 kDa  | 1 | 22.798583 | 0.833333333 | 0.7         | 1.19047619  | 0.84        |
| LIM and calponin homology domains-containing protein 1 OS=Mus musculus GN=D3YU22_MOUSE (+1)            | 120 kDa | 1 | 27.701235 | 1.066666667 | 1.033333333 | 1.032258065 | 0.96875     |
| Cluster of Synaptopodin-2 OS=Mus musculus GN=Synpo2 PE=2 SV=1 (E9)E9Q1U2_MOUSE [2]                     | 136 kDa | 1 | 0         | #VALUE!     | #VALUE!     | #VALUE!     | #VALUE!     |
| Ferrochelatase, mitochondrial OS=Mus musculus GN=Fech PE=1 SV=2 HEMH_MOUSE (+1)                        | 47 kDa  | 1 | 21.199597 | 1           | 1           | 1           | 1           |
| Histidine triad nucleotide-binding protein 2, mitochondrial OS=Mus musculus GN=HINT2_MOUSE             | 17 kDa  | 1 | 20.254165 | 1.1         | 1.033333333 | 1.064516129 | 0.939393939 |
| Heterochromatin protein 1-binding protein 3 OS=Mus musculus GN=Hp1HP1B3_MOUSE                          | 61 kDa  | 1 | 6.35594   | 0.966666667 | 1.233333333 | 0.783783784 | 1.275862069 |
| Adenylosuccinate synthetase OS=Mus musculus GN=Adss1 PE=3 SV=1 J3QN31_MOUSE (+1)                       | 53 kDa  | 1 | 21.082275 | 1           | 1.133333333 | 0.882352941 | 1.133333333 |
| NADH dehydrogenase [ubiquinone] 1 beta subcomplex subunit 4 OS=Mus musculus GN=NDUB4_MOUSE             | 15 kDa  | 1 | 22.795871 | 1           | 1.1         | 0.909090909 | 1.1         |
| Cluster of 26S proteasome non-ATPase regulatory subunit 2 OS=Mus musculus GN=PSMD2_MOUSE [2]           | 100 kDa | 1 | 14.183229 | 0.933333333 | 1           | 0.933333333 | 1.071428571 |
| Ig mu chain C region secreted form OS=Mus musculus GN=Igh-6 PE=1 SV IGHM_MOUSE                         | 50 kDa  | 1 | 20.744331 | 0.933333333 | 0.8         | 1.166666667 | 0.857142857 |
| Sulfated glycoprotein 1 OS=Mus musculus GN=Psap PE=4 SV=1 J3QPG5_MOUSE (+3)                            | 61 kDa  | 1 | 23.429663 | 1.1         | 1.133333333 | 0.970588235 | 1.03030303  |
| Lipoamide acyltransferase component of branched-chain alpha-keto acid ODB2_MOUSE                       | 53 kDa  | 1 | 21.46635  | 1.033333333 | 1.1         | 0.939393939 | 1.064516129 |
| Cluster of Elongation factor 1-delta (Fragment) OS=Mus musculus GN=Ee1E9QN08_MOUSE [3]                 | 27 kDa  | 1 | 22.249684 | 0.866666667 | 0.866666667 | 1           | 1           |
| Nicotinamide phosphoribosyltransferase OS=Mus musculus GN=Nampt1 NAMPT_MOUSE                           | 55 kDa  | 1 | 24.045411 | 1.266666667 | 1.3         | 0.974358974 | 1.026315789 |
| Cluster of Palmidolphin OS=Mus musculus GN=Palmd PE=2 SV=1 (Q3UVT Q3UVT7_MOUSE [2]                     | 63 kDa  | 1 | 0         | 0.75        | 1.05        | 0.714285714 | 1.4         |
| T-complex protein 1 subunit epsilon OS=Mus musculus GN=Cct5 PE=1 SV TPCPE_MOUSE                        | 60 kDa  | 1 | 19.240971 | 0.866666667 | 0.933333333 | 0.928571429 | 1.076923077 |
| Cluster of MCG130675 OS=Mus musculus GN=2410018M08Rik PE=2 SV=B2RPU8_MOUSE [2]                         | 84 kDa  | 1 | 12.4948   | 0.8         | 0.75        | 1.066666667 | 0.9375      |
| Cluster of Nuclease-sensitive element-binding protein 1 (Fragment) OS=Mus musculus GN=A2BGG7_MOUSE [2] | 25 kDa  | 1 | 0         | #VALUE!     | #VALUE!     | #VALUE!     | #VALUE!     |
| ADP/ATP translocase 4 OS=Mus musculus GN=Slc25a31 PE=2 SV=1 ADT4_MOUSE                                 | 35 kDa  | 1 | 23.385182 | 1.133333333 | 1           | 1.133333333 | 0.882352941 |
| Cadherin-13 OS=Mus musculus GN=Cdh13 PE=1 SV=2 CAD13_MOUSE                                             | 78 kDa  | 1 | 21.390262 | 1.3         | 1.166666667 | 1.114285714 | 0.897435897 |
| Calnexin OS=Mus musculus GN=Canx PE=1 SV=1 CALX_MOUSE                                                  | 67 kDa  | 1 | 20.065323 | 1.133333333 | 1.233333333 | 0.918918919 | 1.088235294 |
| Fibrinogen gamma chain OS=Mus musculus GN=Fgg PE=2 SV=1 FIBG_MOUSE                                     | 49 kDa  | 1 | 20.287552 | 1.033333333 | 1.133333333 | 0.911764706 | 1.096774194 |
| Fibronectin OS=Mus musculus GN=Fn1 PE=1 SV=4 FINC_MOUSE                                                | 273 kDa | 1 | 20.054449 | 0.933333333 | 0.966666667 | 0.965517241 | 1.035714286 |
| Cluster of cAMP-dependent protein kinase catalytic subunit alpha OS=Mus musculus GN=KAPCA_MOUSE [2]    | 41 kDa  | 1 | 18.989395 | 1.066666667 | 1.2         | 0.888888889 | 1.125       |
| Cluster of 60S ribosomal protein L24 OS=Mus musculus GN=Rpl24 PE=2 SV RL24_MOUSE                       | 18 kDa  | 1 | 22.80761  | 0.9         | 1.066666667 | 0.84375     | 1.185185185 |
| 40S ribosomal protein S6 OS=Mus musculus GN=Rps6 PE=1 SV=1 RS6_MOUSE                                   | 29 kDa  | 1 | 20.752513 | 0.933333333 | 1.1         | 0.848484848 | 1.178571429 |
| Transthyretin OS=Mus musculus GN=Ttr PE=1 SV=1 TTHY_MOUSE                                              | 16 kDa  | 1 | 20.514244 | 0.966666667 | 0.833333333 | 1.16        | 0.862068966 |
| Cluster of Archvillin OS=Mus musculus GN=Svil PE=2 SV=1 (Q8K4L2_MOUSE Q8K4L2_MOUSE                     | 227 kDa | 1 | 14.063953 | 0.933333333 | 0.866666667 | 1.076923077 | 0.928571429 |
| Cullin-associated NEDD8-dissociated protein 2 OS=Mus musculus GN=Ca CAND2_MOUSE                        | 136 kDa | 1 | 20.93455  | 1.033333333 | 1.066666667 | 0.96875     | 1.032258065 |
| Histone-lysine N-methyltransferase, H3 lysine-36 and H4 lysine-20-specific E9QAE4_MOUSE                | 296 kDa | 1 | 0         | 0.9         | 0.8         | 1.125       | 0.888888889 |
| Receptor accessory protein 5, isoform CRA_a OS=Mus musculus GN=Ree G3X8R0_MOUSE                        | 21 kDa  | 1 | 23.310374 | 1           | 1.166666667 | 0.857142857 | 1.166666667 |
| Laminin subunit beta-2 OS=Mus musculus GN=Lamb2 PE=2 SV=2 LAMB2_MOUSE                                  | 197 kDa | 1 | 20.518704 | 0.966666667 | 0.866666667 | 1.115384615 | 0.896551724 |
| NADH dehydrogenase [ubiquinone] 1 beta subcomplex subunit 11, mitochondrial NDUBB_MOUSE                | 17 kDa  | 1 | 39.40191  | 0.9         | 0.733333333 | 1.227272727 | 0.814814815 |
| Vitamin D-binding protein OS=Mus musculus GN=Gc PE=1 SV=2 VTDB_MOUSE                                   | 54 kDa  | 1 | 20.246282 | 0.9         | 0.9         | 1           | 1           |
| Probable C->U-editing enzyme APOBEC-2 OS=Mus musculus GN=ApoBec ABEC2_MOUSE                            | 26 kDa  | 1 | 22.58346  | 0.933333333 | 1.133333333 | 0.823529412 | 1.214285714 |
| Cluster of Acyl-coenzyme A thioesterase 9, mitochondrial OS=Mus musculus GN=ACOT9_MOUSE [2]            | 51 kDa  | 1 | 6.115666  | 1.033333333 | 0.966666667 | 1.068965517 | 0.935483871 |
| Cluster of ATPase family AAA domain-containing protein 3 OS=Mus musculus GN=ATAD3_MOUSE                | 67 kDa  | 1 | 21.057509 | 0.966666667 | 0.966666667 | 1           | 1           |
| Elongation factor 1-alpha 1 OS=Mus musculus GN=Eef1a1 PE=1 SV=3 EF1A1_MOUSE                            | 50 kDa  | 1 | 23.668197 | 0.733333333 | 0.733333333 | 1           | 1           |
| Acylpyruvate FAHD1, mitochondrial OS=Mus musculus GN=FAhd1 PE=1 SV FAHD1_MOUSE                         | 25 kDa  | 1 | 60.405296 | 1.133333333 | 1.3         | 0.871794872 | 1.147058824 |
| Ferritin heavy chain OS=Mus musculus GN=Fth1 PE=1 SV=2 FRIH_MOUSE                                      | 21 kDa  | 1 | 19.612518 | 0.9         | 0.933333333 | 0.964285714 | 1.037037037 |
| Cluster of Eukaryotic initiation factor 4A-II OS=Mus musculus GN=Eif4a2 IF4A2_MOUSE [2]                | 46 kDa  | 1 | 22.808841 | 1.066666667 | 1.066666667 | 1           | 1           |
| Eukaryotic translation initiation factor 4B OS=Mus musculus GN=Eif4b EIF4B_MOUSE                       | 69 kDa  | 1 | 32.508352 | 0.8         | 0.766666667 | 1.043478261 | 0.958333333 |

|                                                                                                 |                   |         |   |           |             |             |             |             |
|-------------------------------------------------------------------------------------------------|-------------------|---------|---|-----------|-------------|-------------|-------------|-------------|
| Adenylosuccinate lyase OS=Mus musculus GN=Adsl PE=2 SV=2                                        | PUR8_MOUSE        | 55 kDa  | 1 | 25.604364 | 0.966666667 | 1.1         | 0.878787879 | 1.137931034 |
| Peripherin OS=Mus musculus GN=Prph PE=1 SV=2                                                    | PERI_MOUSE (+1)   | 54 kDa  | 1 | 0         | 1           | 1           | 1           | 1           |
| [Protein ADP-ribosylarginine] hydrolase-like protein 1 OS=Mus musculus ARHL1_MOUSE              | ARHL1_MOUSE       | 40 kDa  | 1 | 21.692301 | 1.033333333 | 0.966666667 | 1.068965517 | 0.935483871 |
| Actin-related protein 2/3 complex subunit 4 OS=Mus musculus GN=Arpc ARPC4_MOUSE                 | ARPC4_MOUSE       | 20 kDa  | 1 | 22.25852  | 0.966666667 | 1           | 0.966666667 | 1.034482759 |
| Transcription elongation factor B polypeptide 2 OS=Mus musculus GN=T ELOB_MOUSE                 | ELOB_MOUSE        | 13 kDa  | 1 | 20.435576 | 1           | 1           | 1           | 1           |
| Serine/arginine-rich-splicing factor 1 OS=Mus musculus GN=Srf1 PE=2 S H7BX95_MOUSE (+1)         | H7BX95_MOUSE (+1) | 28 kDa  | 1 | 22.638899 | 1.033333333 | 1           | 1.033333333 | 0.967741935 |
| Laminin subunit alpha-4 OS=Mus musculus GN=Lama4 PE=1 SV=2                                      | LAMA4_MOUSE       | 202 kDa | 1 | 21.065247 | 1           | 0.966666667 | 1.034482759 | 0.966666667 |
| Mitochondrial fission process protein 1 OS=Mus musculus GN=Mtff1 PE=1 MTFP1_MOUSE               | MTFP1_MOUSE       | 18 kDa  | 1 | 21.10341  | 0.966666667 | 0.966666667 | 1           | 1           |
| Prostaglandin reductase 2 OS=Mus musculus GN=Ptgr2 PE=1 SV=2                                    | PTGR2_MOUSE       | 38 kDa  | 1 | 20.81221  | 0.9         | 1.066666667 | 0.84375     | 1.185185185 |
| Protein Sf3b2 OS=Mus musculus GN=Sf3b2 PE=2 SV=1                                                | Q3UJB0_MOUSE      | 98 kDa  | 1 | 16.187775 | 0.75        | 0.85        | 0.882352941 | 1.133333333 |
| 40S ribosomal protein S12 OS=Mus musculus GN=Rps12 PE=2 SV=1                                    | Q6ZWZ6_MOUSE      | 15 kDa  | 1 | 22.52498  | 0.833333333 | 0.933333333 | 0.892857143 | 1.12        |
| 26S protease regulatory subunit 7 OS=Mus musculus GN=Psmc2 PE=2 SV=1 Q8BVQ9_MOUSE               | Q8BVQ9_MOUSE      | 53 kDa  | 1 | 22.642271 | 0.933333333 | 0.966666667 | 0.965517241 | 1.035714286 |
| 60S ribosomal protein L5 OS=Mus musculus GN=Rpl5 PE=1 SV=3                                      | RL5_MOUSE         | 34 kDa  | 1 | 19.330601 | 0.966666667 | 1.033333333 | 0.935483871 | 1.068965517 |
| Transcription factor A, mitochondrial OS=Mus musculus GN=Tfam PE=1 TFAM_MOUSE                   | TFAM_MOUSE        | 28 kDa  | 1 | 19.59383  | 0.966666667 | 0.933333333 | 1.035714286 | 0.965517241 |
| Glycogenin-1 OS=Mus musculus GN=Gyg1 PE=2 SV=3                                                  | GLYG_MOUSE (+1)   | 37 kDa  | 1 | 21.226205 | 0.966666667 | 0.9         | 1.074074111 | 0.931034451 |
| Muscle-related coiled-coil protein OS=Mus musculus GN=Murc PE=2 SV=1 MURC_MOUSE                 | MURC_MOUSE        | 41 kDa  | 1 | 21.631828 | 1.066666667 | 0.933333333 | 1.142857143 | 0.875       |
| Cluster of Myosin light polypeptide 6 OS=Mus musculus GN=Myl6 PE=1 MYL6_MOUSE [2]               | MYL6_MOUSE [2]    | 17 kDa  | 1 | 23.603867 | 0.9         | 0.766666667 | 1.173913043 | 0.851851852 |
| 26S protease regulatory subunit 4 OS=Mus musculus GN=Psmc1 PE=1 SV=1 SVPRS4_MOUSE               | SVPRS4_MOUSE      | 49 kDa  | 1 | 47.199312 | 1.033333333 | 1.1         | 0.939393939 | 1.064516129 |
| 26S proteasome non-ATPase regulatory subunit 1 OS=Mus musculus GN=PSMD1_MOUSE                   | PSMD1_MOUSE       | 106 kDa | 1 | 19.74388  | 0.9         | 1.033333333 | 0.870967742 | 1.148148148 |
| Cluster of Prothymosin alpha OS=Mus musculus GN=Ptma PE=1 SV=2 (P1PTMA_MOUSE                    | P1PTMA_MOUSE      | 12 kDa  | 1 | 21.409719 | 1           | 0.833333333 | 1.2         | 0.833333333 |
| Bifunctional purine biosynthesis protein PURH OS=Mus musculus GN=At PUR9_MOUSE                  | PUR9_MOUSE        | 64 kDa  | 1 | 14.661838 | 0.9         | 1           | 0.9         | 1.111111111 |
| Cluster of Protein kinase, cAMP dependent regulatory, type II alpha OS=Q8K1M3_MOUSE             | Q8K1M3_MOUSE      | 46 kDa  | 1 | 20.898531 | 1           | 1.033333333 | 0.967741935 | 1.033333333 |
| Aspartate--tRNA ligase, cytoplasmic OS=Mus musculus GN=Dars PE=2 SV=1 SVYDC_MOUSE               | SVYDC_MOUSE       | 57 kDa  | 1 | 20.832342 | 1           | 1           | 1           | 1           |
| Cluster of Elongation factor G, mitochondrial OS=Mus musculus GN=Gfm EFGM_MOUSE                 | EFGM_MOUSE        | 84 kDa  | 1 | 13.963708 | 0.933333333 | 1           | 0.933333333 | 1.071428571 |
| Cluster of Protein Gm4945 OS=Mus musculus GN=Gm4945 PE=4 SV=1 (D3Z102_MOUSE                     | D3Z102_MOUSE      | 16 kDa  | 1 | 19.438279 | 0.966666667 | 1.066666667 | 0.90625     | 1.103448276 |
| Cluster of Protein Etl4 OS=Mus musculus GN=Etl4 PE=2 SV=1 (E9QAU4_MOUSE                         | E9QAU4_MOUSE      | 218 kDa | 1 | 6.695105  | 1           | 1           | 1           | 1           |
| Coiled-coil protein associated with myosin II and DISC1 OS=Mus musculus A2AST1_MOUSE (+1)       | A2AST1_MOUSE (+1) | 165 kDa | 1 | 12.835398 | 1.033333333 | 1.1         | 0.939393939 | 1.064516129 |
| Cluster of Rab GDP dissociation inhibitor beta OS=Mus musculus GN=Gd GDIB_MOUSE [2]             | GDIB_MOUSE [2]    | 51 kDa  | 1 | 24.443437 | 1.066666667 | 1.066666667 | 1           | 1           |
| Cluster of Glyoxalase domain-containing protein 4 OS=Mus musculus GN=GLOD4_MOUSE [2]            | GLOD4_MOUSE [2]   | 33 kDa  | 1 | 21.97495  | 1.133333333 | 1.233333333 | 0.918918919 | 1.088235294 |
| Eukaryotic translation initiation factor 5A-1 OS=Mus musculus GN=Eif5a IF5A1_MOUSE              | IF5A1_MOUSE       | 17 kDa  | 1 | 20.03944  | 0.866666667 | 0.833333333 | 1.04        | 0.961538462 |
| Junctophilin-2 OS=Mus musculus GN=Jph2 PE=1 SV=2                                                | JPH2_MOUSE        | 75 kDa  | 1 | 22.219017 | 1.1         | 1           | 1.1         | 0.909090909 |
| Cluster of Poly(rC)-binding protein 1 OS=Mus musculus GN=Pcbp1 PE=1 PCBP1_MOUSE [4]             | PCBP1_MOUSE [4]   | 37 kDa  | 1 | 35.70203  | 1.1         | 1.033333333 | 1.064516129 | 0.939393939 |
| Programmed cell death 6-interacting protein OS=Mus musculus GN=Pdc1 PDC6_MOUSE                  | PDC6_MOUSE        | 96 kDa  | 1 | 22.275603 | 0.966666667 | 1           | 0.966666667 | 1.034482759 |
| Cluster of Ank1 protein OS=Mus musculus GN=Ank1 PE=2 SV=1 (Q0VGY9_MOUSE [3]                     | Q0VGY9_MOUSE [3]  | 207 kDa | 1 | 0         | #VALUE!     | #VALUE!     | #VALUE!     | #VALUE!     |
| Sorting and assembly machinery component 50 homolog OS=Mus musculus SAM50_MOUSE                 | SAM50_MOUSE       | 52 kDa  | 1 | 47.73003  | 1.1         | 1.266666667 | 0.868421053 | 1.151515152 |
| T-complex protein 1 subunit theta OS=Mus musculus GN=Cct8 PE=1 SV=1 TCPQ_MOUSE                  | TCPQ_MOUSE        | 60 kDa  | 1 | 20.282198 | 0.933333333 | 1           | 0.933333333 | 1.071428571 |
| Cluster of Muscular LMNA-interacting protein OS=Mus musculus GN=Ml tr V9GWW6 V9GWW6_MOUSE       | V9GWW6_MOUSE      | ?       | 1 | 22.278617 | 0.933333333 | 0.9         | 1.037037037 | 0.964285714 |
| Cluster of Isoform 2 of Protein phosphatase 1 regulatory subunit 12A OS=sp Q9DBR7-2 MYPT1_MOUSE | Q9DBR7-2_MOUSE    | ?       | 1 | 0         | #VALUE!     | #VALUE!     | #VALUE!     | #VALUE!     |
| Mitochondrial pyruvate carrier 2 OS=Mus musculus GN=Mpc2 PE=1 SV=1 MPC2_MOUSE                   | MPC2_MOUSE        | 14 kDa  | 1 | 22.577049 | 1.1         | 1.366666667 | 0.804878049 | 1.242424242 |
| Cluster of Replication factor C subunit 1 OS=Mus musculus GN=Rfc1 PE=1 G3UWX1_MOUSE [6]         | G3UWX1_MOUSE [6]  | 126 kDa | 1 | 7.6247565 | 1.1         | 1.1         | 1           | 1           |
| Cluster of Calumenin OS=Mus musculus GN=Calu PE=1 SV=1 (CALU_MOUSE                              | CALU_MOUSE        | 37 kDa  | 1 | 20.295848 | 0.933333333 | 0.866666667 | 1.076923077 | 0.928571429 |
| 60S acidic ribosomal protein P0 (Fragment) OS=Mus musculus GN=Rplp0 D3YVM5_MOUSE (+2)           | D3YVM5_MOUSE (+2) | 16 kDa  | 1 | 21.167445 | 0.933333333 | 1.033333333 | 0.903225806 | 1.107142857 |
| Filamin-B OS=Mus musculus GN=Flnb PE=1 SV=3                                                     | FLNB_MOUSE        | 278 kDa | 1 | 13.790981 | 1.066666667 | 1.033333333 | 1.032258065 | 0.96875     |
| Pyruvate carboxylase OS=Mus musculus GN=Pcx PE=3 SV=1                                           | G5E8R3_MOUSE (+1) | 130 kDa | 1 | 20.360175 | 1           | 0.866666667 | 1.153846154 | 0.866666667 |
| Unconventional myosin-1c OS=Mus musculus GN=Myo1c PE=1 SV=2                                     | MYO1C_MOUSE (+3)  | 122 kDa | 1 | 20.641302 | 1.033333333 | 1.1         | 0.939393939 | 1.064516129 |
| 26S protease regulatory subunit 6A OS=Mus musculus GN=Psmc3 PE=1 SPRS6A_MOUSE                   | SPRS6A_MOUSE      | 50 kDa  | 1 | 23.494495 | 0.933333333 | 0.866666667 | 1.076923077 | 0.928571429 |
| Radixin OS=Mus musculus GN=Rdx PE=1 SV=3                                                        | RADI_MOUSE        | 69 kDa  | 1 | 26.30181  | 0.933333333 | 1           | 0.933333333 | 1.071428571 |
| 60S ribosomal protein L8 OS=Mus musculus GN=Rpl8 PE=2 SV=2                                      | RL8_MOUSE         | 28 kDa  | 1 | 20.572698 | 0.933333333 | 1           | 0.933333333 | 1.071428571 |
| Bifunctional glutamate/proline--tRNA ligase OS=Mus musculus GN=Eprs SYEP_MOUSE                  | SYEP_MOUSE        | 170 kDa | 1 | 19.91574  | 0.933333333 | 0.9         | 1.037037037 | 0.964285714 |
| T-complex protein 1 subunit eta OS=Mus musculus GN=Cct7 PE=1 SV=1 TCPH_MOUSE                    | TCPH_MOUSE        | 60 kDa  | 1 | 20.280574 | 0.966666667 | 1.033333333 | 0.935483871 | 1.068965517 |
| Cluster of STE20-like serine/threonine-protein kinase OS=Mus musculus SLK_MOUSE [2]             | SLK_MOUSE [2]     | 141 kDa | 1 | 0         | #VALUE!     | #VALUE!     | #VALUE!     | #VALUE!     |
| Cluster of Uncharacterized protein OS=Mus musculus GN=Gm10260 PE=1 F6YVP7_MOUSE [2]             | F6YVP7_MOUSE [2]  | 18 kDa  | 1 | 0         | #VALUE!     | #VALUE!     | #VALUE!     | #VALUE!     |
| Cluster of 5-azacytidine induced gene 1 OS=Mus musculus GN=Azi1 PE=2 B1AXI9_MOUSE [2]           | B1AXI9_MOUSE [2]  | 120 kDa | 1 | 0         | #VALUE!     | #VALUE!     | #VALUE!     | #VALUE!     |

|                                                                                            |         |   |           |             |             |             |             |
|--------------------------------------------------------------------------------------------|---------|---|-----------|-------------|-------------|-------------|-------------|
| Eukaryotic translation initiation factor 3 subunit G OS=Mus musculus GNEIF3G_MOUSE         | 36 kDa  | 1 | 19.377226 | 0.933333333 | 0.966666667 | 0.965517241 | 1.035714286 |
| Rho GDP-dissociation inhibitor 1 OS=Mus musculus GN=Arhgdia PE=1 SV=1 GDIR1_MOUSE          | 23 kDa  | 1 | 22.530189 | 0.9         | 0.966666667 | 0.931034483 | 1.074074074 |
| 60S ribosomal protein L10 (Fragment) OS=Mus musculus GN=Rpl10 PE=4 I7HLV2_MOUSE (+1)       | 23 kDa  | 1 | 21.37207  | 0.966666667 | 1.1         | 0.878787879 | 1.137931034 |
| Lipoprotein lipase OS=Mus musculus GN=Lpl PE=1 SV=3 LPL_MOUSE                              | 53 kDa  | 1 | 19.726844 | 1.033333333 | 1           | 1.033333333 | 0.967741935 |
| Myosin-10 OS=Mus musculus GN=Myh10 PE=1 SV=2 MYH10_MOUSE (+2)                              | 229 kDa | 1 | 10.964391 | 1.033333333 | 0.866666667 | 1.192307692 | 0.838709677 |
| Nuclear pore complex-associated intranuclear coiled-coil protein TPR OS Q7M739_MOUSE       | 267 kDa | 1 | 16.740105 | 0.866666667 | 0.833333333 | 1.04        | 0.961538462 |
| 60S ribosomal protein L31 OS=Mus musculus GN=Rpl31 PE=2 SV=1 RL31_MOUSE                    | 14 kDa  | 1 | 22.355245 | 0.9         | 1.033333333 | 0.870967742 | 1.148148148 |
| 40S ribosomal protein S3 OS=Mus musculus GN=Rps3 PE=1 SV=1 RS3_MOUSE                       | 27 kDa  | 1 | 20.922197 | 0.933333333 | 1           | 0.933333333 | 1.071428571 |
| Adenosylhomocysteinase OS=Mus musculus GN=Ahcy PE=1 SV=3 SAHH_MOUSE                        | 48 kDa  | 1 | 19.621514 | 1           | 1           | 1           | 1           |
| T-complex protein 1 subunit alpha OS=Mus musculus GN=Tcp1 PE=1 SV=1 TCPA_MOUSE             | 60 kDa  | 1 | 22.400063 | 0.933333333 | 0.9         | 1.037037037 | 0.964285714 |
| NADH dehydrogenase [ubiquinone] 1 beta subcomplex subunit 3 OS=Mt NDUB3_MOUSE              | 12 kDa  | 1 | 26.06619  | 1           | 0.933333333 | 1.071428571 | 0.933333333 |
| UPF0317 protein C14orf159 homolog, mitochondrial OS=Mus musculus ICN159_MOUSE (+1)         | 66 kDa  | 1 | 23.33662  | 1.133333333 | 1.133333333 | 1           | 1           |
| Collagen alpha-2(VI) chain OS=Mus musculus GN=Col6a2 PE=2 SV=3 CO6A2_MOUSE                 | 110 kDa | 1 | 20.580691 | 1.366666667 | 1.133333333 | 1.205882353 | 0.829268293 |
| 60S ribosomal protein L13a OS=Mus musculus GN=Rpl13a PE=2 SV=1 E9Q5A0_MOUSE                | 48 kDa  | 1 | 19.168493 | 0.966666667 | 1.133333333 | 0.852941176 | 1.172413793 |
| Kinesin-like protein KIF21B OS=Mus musculus GN=Kif21b PE=2 SV=1 F8VQE2_MOUSE (+1)          | 181 kDa | 1 | 8.172655  | 1.1         | 1.1         | 1           | 1           |
| Histone H1.1 OS=Mus musculus GN=Hist1h1a PE=1 SV=2 H11_MOUSE                               | 22 kDa  | 1 | 9.469792  | 0.9         | 1           | 0.9         | 1.111111111 |
| GTP:AMP phosphotransferase, mitochondrial OS=Mus musculus GN=Ak2KAD3_MOUSE                 | 25 kDa  | 1 | 20.30093  | 0.966666667 | 0.966666667 | 1           | 1           |
| Cluster of NADH dehydrogenase [ubiquinone] 1 beta subcomplex subunit NDUB8_MOUSE           | 22 kDa  | 1 | 21.303912 | 1           | 1.166666667 | 0.857142857 | 1.166666667 |
| 60S ribosomal protein L13 OS=Mus musculus GN=Rpl13 PE=2 SV=3 RL13_MOUSE                    | 24 kDa  | 1 | 20.44002  | 0.933333333 | 1.1         | 0.848484848 | 1.178571429 |
| T-complex protein 1 subunit beta OS=Mus musculus GN=Cct2 PE=1 SV=4 TCPB_MOUSE              | 57 kDa  | 1 | 46.331263 | 1           | 1.033333333 | 0.967741935 | 1.033333333 |
| Mitochondrial import inner membrane translocase subunit TIM44 OS=MTIM44_MOUSE              | 51 kDa  | 1 | 20.449664 | 1.2         | 1.1         | 1.090909091 | 0.916666667 |
| Transketolase OS=Mus musculus GN=Tkt PE=1 SV=1 TKT_MOUSE                                   | 68 kDa  | 1 | 21.893649 | 0.9         | 1.033333333 | 0.870967742 | 1.148148148 |
| NADH dehydrogenase [ubiquinone] 1 beta subcomplex subunit 6 OS=Mt A2AP32_MOUSE (+1)        | 12 kDa  | 1 | 14.414687 | 1.266666667 | 1.066666667 | 1.1875      | 0.842105263 |
| Cluster of Mitochondrial pyruvate carrier 1 OS=Mus musculus GN=Mpc1 MPC1_MOUSE [3]         | 12 kDa  | 1 | 0         | #VALUE!     | #VALUE!     | #VALUE!     | #VALUE!     |
| Cluster of Probable helicase senataxin OS=Mus musculus GN=Setx PE=2 SETX_MOUSE             | 298 kDa | 1 | 6.5563515 | 1.3         | 1.3         | 1           | 1           |
| Ubiquinone biosynthesis monooxygenase COQ6 OS=Mus musculus GN=COQ6_MOUSE                   | 51 kDa  | 1 | 23.105465 | 1           | 1.1         | 0.909090909 | 1.1         |
| Cluster of D-dopachrome decarboxylase OS=Mus musculus GN=Ddt PE=1 DOPD_MOUSE               | 13 kDa  | 1 | 25.325394 | 0.933333333 | 0.9         | 1.037037037 | 0.964285714 |
| MCG116065 OS=Mus musculus GN=Gm6472 PE=4 SV=1 J3QJZ3_MOUSE (+1)                            | 22 kDa  | 1 | 19.710933 | 0.9         | 0.966666667 | 0.931034483 | 1.074074074 |
| NADH dehydrogenase [ubiquinone] 1 alpha subcomplex subunit 12 OS=Mt NDUAC_MOUSE            | 17 kDa  | 1 | 21.706855 | 0.933333333 | 0.933333333 | 1           | 1           |
| Plasminogen OS=Mus musculus GN=Plg PE=1 SV=3 PLMN_MOUSE                                    | 91 kDa  | 1 | 20.636302 | 0.933333333 | 0.933333333 | 1           | 1           |
| Cluster of Serine/threonine-protein phosphatase PP1-alpha catalytic subunit PP1A_MOUSE [4] | 38 kDa  | 1 | 0         | 0.9         | 1           | 0.9         | 1.111111111 |
| 60S ribosomal protein L27 OS=Mus musculus GN=Rpl27 PE=2 SV=2 RL27_MOUSE                    | 16 kDa  | 1 | 20.888783 | 0.513333333 | 0.966666667 | 0.531034479 | 1.883116895 |
| 40S ribosomal protein S25 OS=Mus musculus GN=Rps25 PE=2 SV=1 RS25_MOUSE                    | 14 kDa  | 1 | 24.065381 | 1           | 1.2         | 0.833333333 | 1.2         |
| Heat shock protein 75 kDa, mitochondrial OS=Mus musculus GN=Trap1 FTRAP1_MOUSE             | 80 kDa  | 1 | 21.167408 | 0.966666667 | 1.066666667 | 0.90625     | 1.103448276 |
| Zinc-binding alcohol dehydrogenase domain-containing protein 2 OS=Mt ZADH2_MOUSE           | 41 kDa  | 1 | 22.58135  | 1           | 1.1         | 0.909090909 | 1.1         |
| Synaptopodin 2-like protein OS=Mus musculus GN=Synpo2l PE=2 SV=1 B2RQK7_MOUSE              | 103 kDa | 1 | 14.94315  | 0.9         | 1           | 0.9         | 1.111111111 |
| 40S ribosomal protein S5 (Fragment) OS=Mus musculus GN=Rps5 PE=3 SD3YYM6_MOUSE (+2)        | 20 kDa  | 1 | 7.213274  | 0.95        | 0.95        | 1           | 1           |
| Dystroglycan OS=Mus musculus GN=Dag1 PE=1 SV=4 DAG1_MOUSE                                  | 97 kDa  | 1 | 21.011098 | 1.033333333 | 1.066666667 | 0.96875     | 1.032258065 |
| Eukaryotic translation initiation factor 4 gamma 1 OS=Mus musculus GN=E9PVC5_MOUSE         | 175 kDa | 1 | 22.298212 | 0.966666667 | 1           | 0.966666667 | 1.034482759 |
| Ras-related protein Rab-11A OS=Mus musculus GN=Rab11a PE=2 SV=1 E9Q3P9_MOUSE (+4)          | 17 kDa  | 1 | 21.746005 | 1.1         | 1.133333333 | 0.970588235 | 1.03030303  |
| Cluster of Protein Serpinb6a OS=Mus musculus GN=Serpnb6a PE=2 SV=1 F8WIV2_MOUSE [3]        | 45 kDa  | 1 | 20.189424 | 0.833333333 | 1.066666667 | 0.78125     | 1.28        |
| Four and a half LIM domains protein 1 OS=Mus musculus GN=Fhl1 PE=2 FHL1_MOUSE              | 32 kDa  | 1 | 21.963012 | 0.866666667 | 0.966666667 | 0.896551724 | 1.115384615 |
| Glutaryl-CoA dehydrogenase, mitochondrial OS=Mus musculus GN=Gcdl GCDH_MOUSE               | 49 kDa  | 1 | 24.420924 | 1.033333333 | 1.166666667 | 0.885714286 | 1.129032258 |
| Importin-5 OS=Mus musculus GN=Ipo5 PE=1 SV=3 IPO5_MOUSE                                    | 124 kDa | 1 | 25.379056 | 1           | 1.166666667 | 0.857142857 | 1.166666667 |
| MAP7 domain-containing protein 1 OS=Mus musculus GN=Map7d1 PE=1 IMA7D1_MOUSE               | 93 kDa  | 1 | 18.271294 | 0.8         | 0.833333333 | 0.96        | 1.041666667 |
| Cluster of Myosin regulatory light chain 12B OS=Mus musculus GN=Myl1 ML12B_MOUSE [3]       | 20 kDa  | 1 | 21.92504  | 0.833333333 | 0.7         | 1.19047619  | 0.84        |
| Myosin light chain kinase 3 OS=Mus musculus GN=Mylk3 PE=1 SV=1 MYLK3_MOUSE                 | 86 kDa  | 1 | 21.65973  | 0.9         | 1.033333333 | 0.870967742 | 1.148148148 |
| Serine/threonine-protein phosphatase 2A catalytic subunit alpha isoform PP2AA_MOUSE        | 36 kDa  | 1 | 25.095513 | 0.866666667 | 1.033333333 | 0.838709677 | 1.192307692 |
| 60S ribosomal protein L10a OS=Mus musculus GN=Rpl10a PE=1 SV=3 RL10A_MOUSE                 | 25 kDa  | 1 | 20.442341 | 1           | 1.066666667 | 0.9375      | 1.066666667 |
| Cluster of T-complex protein 1 subunit delta OS=Mus musculus GN=Cct4 TCPD_MOUSE [2]        | 58 kDa  | 1 | 0         | 1.05        | 0.9         | 1.166666667 | 0.857142857 |
| Cluster of NEDD8-conjugating enzyme Ubc12 OS=Mus musculus GN=Ubc12 UBC12_MOUSE             | 21 kDa  | 1 | 19.828305 | 0.966666667 | 0.933333333 | 1.035714286 | 0.965517241 |
| Cluster of Estradiol 17-beta-dehydrogenase 8 OS=Mus musculus GN=HscDH8_MOUSE [2]           | 27 kDa  | 1 | 21.343417 | 0.933333333 | 1           | 0.933333333 | 1.071428571 |
| Cluster of NSFL1 cofactor p47 OS=Mus musculus GN=Nsf1c PE=2 SV=1 A2AT02_MOUSE [4]          | 37 kDa  | 1 | 0         | 0.9         | 1           | 0.9         | 1.111111111 |

|                                                                                                      |                   |         |   |           |             |            |             |             |
|------------------------------------------------------------------------------------------------------|-------------------|---------|---|-----------|-------------|------------|-------------|-------------|
| Ras suppressor protein 1 OS=Mus musculus GN=Rsu1 PE=4 SV=1                                           | A2AUR7_MOUSE (+2) | 30 kDa  | 1 | 20.05867  | 0.96666667  | 0.96666667 | 1           | 1           |
| ATPase family AAA domain-containing protein 1 OS=Mus musculus GN=ATAD1_MOUSE                         |                   | 41 kDa  | 1 | 25.589737 | 1.36666667  | 1.3        | 1.051282051 | 0.951219512 |
| Clustered mitochondria protein homolog OS=Mus musculus GN=Cluh PE CLU_MOUSE                          |                   | 148 kDa | 1 | 20.576704 | 1.1         | 1.16666667 | 0.942857143 | 1.060606061 |
| Malonyl-CoA decarboxylase, mitochondrial OS=Mus musculus GN=MlyccDCMC_MOUSE                          |                   | 55 kDa  | 1 | 20.646286 | 1.06666667  | 1.1        | 0.96969697  | 1.03125     |
| Protein Rpl31 OS=Mus musculus GN=Rpl31 PE=2 SV=1                                                     | E9PWZ3_MOUSE      | 47 kDa  | 1 | 16.227219 | 1.033333333 | 1          | 1.033333333 | 0.967741935 |
| Cluster of Calcium/calmodulin-dependent protein kinase type II subunit E9Q1T1_MOUSE [2]              |                   | 60 kDa  | 1 | 21.927457 | 0.9         | 1          | 0.9         | 1.111111111 |
| Cardiomyopathy-associated protein 5 OS=Mus musculus GN=Cmya5 PE=E9QLJ0_MOUSE                         |                   | 406 kDa | 1 | 12.605646 | 0.933333333 | 0.9        | 1.037037037 | 0.964285714 |
| Ezrin OS=Mus musculus GN=Ezr PE=1 SV=3                                                               | EZRI_MOUSE        | 69 kDa  | 1 | 21.269904 | 1.1         | 1.16666667 | 0.942857143 | 1.060606061 |
| Protein FAM162A OS=Mus musculus GN=Fam162a PE=2 SV=1                                                 | F162A_MOUSE       | 18 kDa  | 1 | 27.96448  | 1.033333333 | 1.16666667 | 0.885714286 | 1.129032258 |
| Cluster of Hydroxyacyl glutathione hydrolase OS=Mus musculus GN=Hag G5E8T9_MOUSE [2]                 |                   | 34 kDa  | 1 | 21.000451 | 0.833333333 | 0.8        | 1.041666667 | 0.96        |
| Heterogeneous nuclear ribonucleoprotein L (Fragment) OS=Mus musculus GN=G5E924_MOUSE                 |                   | 67 kDa  | 1 | 19.700597 | 0.86666667  | 0.96666667 | 0.896551724 | 1.115384615 |
| Bifunctional epoxide hydrolase 2 OS=Mus musculus GN=Ephx2 PE=1 SV= HYES_MOUSE                        |                   | 63 kDa  | 1 | 20.851794 | 1.033333333 | 1.06666667 | 0.96875     | 1.032258065 |
| Kelch-like protein 41 OS=Mus musculus GN=Klh41 PE=1 SV=1                                             | KLH41_MOUSE       | 68 kDa  | 1 | 23.114243 | 1           | 1.16666667 | 0.857142857 | 1.166666667 |
| Mitochondrial peptide methionine sulfoxide reductase OS=Mus musculus GN=MSRA_MOUSE                   |                   | 26 kDa  | 1 | 20.943744 | 1.06666667  | 1          | 1.066666667 | 0.9375      |
| Metaxin-2 OS=Mus musculus GN=Mtx2 PE=1 SV=1                                                          | MTX2_MOUSE        | 30 kDa  | 1 | 22.055636 | 0.96666667  | 1.03333333 | 0.935483871 | 1.068965517 |
| Cluster of 2-oxoisovalerate dehydrogenase subunit alpha, mitochondrial ODBA_MOUSE [2]                |                   | 50 kDa  | 1 | 0         | #VALUE!     | #VALUE!    | #VALUE!     | #VALUE!     |
| Protein disulfide-isomerase A6 OS=Mus musculus GN=Pdia6 PE=1 SV=3 PDIA6_MOUSE (+1)                   |                   | 48 kDa  | 1 | 22.239387 | 0.933333333 | 1.13333333 | 0.823529412 | 1.214285714 |
| [Pyruvate dehydrogenase (lipoamide)] kinase isozyme 2, mitochondrial CDPK2_MOUSE                     |                   | 46 kDa  | 1 | 21.079832 | 1           | 1          | 1           | 1           |
| Heterogeneous nuclear ribonucleoprotein A1 OS=Mus musculus GN=Hnr Q5EBP8_MOUSE (+1)                  |                   | 39 kDa  | 1 | 23.999734 | 0.8         | 0.9        | 0.888888889 | 1.125       |
| 40S ribosomal protein S8 OS=Mus musculus GN=Rps8 PE=1 SV=2                                           | RS8_MOUSE         | 24 kDa  | 1 | 20.622392 | 0.96666667  | 1.06666667 | 0.90625     | 1.103448276 |
| Septin-7 OS=Mus musculus GN=Sept7 PE=1 SV=1                                                          | SEPT7_MOUSE       | 51 kDa  | 1 | 18.973924 | 0.8         | 0.9        | 0.888888889 | 1.125       |
| Sulfide:quinone oxidoreductase, mitochondrial OS=Mus musculus GN=SrSQRD_MOUSE                        |                   | 50 kDa  | 1 | 17.730577 | 1.15        | 1.05       | 1.095238095 | 0.913043478 |
| Phenylalanine--tRNA ligase beta subunit OS=Mus musculus GN=Farsb PE SYFB_MOUSE                       |                   | 66 kDa  | 1 | 7.797211  | 0.9         | 1          | 0.9         | 1.111111111 |
| Cluster of T-complex protein 1 subunit zeta OS=Mus musculus GN=Cct6aTCPZ_MOUSE                       |                   | 58 kDa  | 1 | 22.672342 | 0.96666667  | 1          | 0.966666667 | 1.034482759 |
| Dedicator of cytokinesis protein 7 OS=Mus musculus GN=Dock7 PE=2 SV A2A9M5_MOUSE (+2)                |                   | 241 kDa | 1 | 0         | 1.4         | 1.7        | 0.823529412 | 1.214285714 |
| Apolipoprotein E OS=Mus musculus GN=Apoe PE=1 SV=2                                                   | APOE_MOUSE        | 36 kDa  | 1 | 20.109908 | 0.8         | 0.8        | 1           | 1           |
| BolaA-like protein 3 OS=Mus musculus GN=Bola3 PE=2 SV=1                                              | BOLA3_MOUSE       | 12 kDa  | 1 | 20.363095 | 0.933333333 | 0.93333333 | 1           | 1           |
| Dihydropteridine reductase OS=Mus musculus GN=Qdpr PE=1 SV=2                                         | DHPR_MOUSE        | 26 kDa  | 1 | 21.434425 | 0.96666667  | 1.06666667 | 0.90625     | 1.103448276 |
| Cluster of Proteasome subunit alpha type-7 OS=Mus musculus GN=PsmA7_MOUSE                            |                   | 28 kDa  | 1 | 20.079666 | 1           | 1.03333333 | 0.967741935 | 1.033333333 |
| Ryanodine receptor 1 OS=Mus musculus GN=Ryr1 PE=1 SV=1                                               | RYR1_MOUSE        | 565 kDa | 1 | 0         | #VALUE!     | #VALUE!    | #VALUE!     | #VALUE!     |
| Cluster of Isoform 2 of Clathrin light chain B OS=Mus musculus GN=Cltb [sp] Q6IRU5-2] CLCB_MOUSE [2] |                   | ?       | 1 | 21.924058 | 0.95        | 0.85       | 1.117647059 | 0.894736842 |
| Cluster of Aldose reductase-related protein 1 OS=Mus musculus GN=Akr ALD1_MOUSE [3]                  |                   | 36 kDa  | 1 | 15.72403  | 1.1         | 1.05       | 1.047619048 | 0.954545455 |
| Apolipoprotein O OS=Mus musculus GN=Apoo PE=2 SV=1                                                   | APOO_MOUSE        | 24 kDa  | 1 | 21.189535 | 0.96666667  | 1.06666667 | 0.90625     | 1.103448276 |
| Cluster of 60S ribosomal protein L12 OS=Mus musculus GN=Rpl12 PE=1 !RL12_MOUSE                       |                   | 18 kDa  | 1 | 22.49839  | 0.9         | 1          | 0.9         | 1.111111111 |
| Cluster of 60S ribosomal protein L32 OS=Mus musculus GN=Rpl32 PE=2 !RL32_MOUSE                       |                   | 16 kDa  | 1 | 20.596597 | 1.033333333 | 1.2        | 0.861111111 | 1.161290323 |
| Cluster of Transforming acidic coiled-coil-containing protein 2 OS=Mus musculus GN=E9Q8T1_MOUSE      |                   | 305 kDa | 1 | 13.783537 | 0.85        | 0.8        | 1.0625      | 0.941176471 |
| 6-phosphogluconolactonase OS=Mus musculus GN=PglS PE=2 SV=1                                          | 6PGL_MOUSE        | 27 kDa  | 1 | 22.288658 | 1           | 1.06666667 | 0.9375      | 1.066666667 |
| Alpha-actinin-4 OS=Mus musculus GN=Actn4 PE=1 SV=1                                                   | ACTN4_MOUSE       | 105 kDa | 1 | 20.620131 | 1           | 1          | 1           | 1           |
| Cytosol aminopeptidase OS=Mus musculus GN=Lap3 PE=1 SV=3                                             | AMPL_MOUSE (+1)   | 56 kDa  | 1 | 21.055734 | 0.833333333 | 0.83333333 | 1           | 1           |
| Beta-2-glycoprotein 1 OS=Mus musculus GN=Apoh PE=1 SV=1                                              | APOH_MOUSE        | 39 kDa  | 1 | 24.887437 | 1           | 0.96666667 | 1.034482759 | 0.966666667 |
| Thioredoxin reductase 2, mitochondrial OS=Mus musculus GN=Txnrd2 PID3Z0K8_MOUSE (+3)                 |                   | 53 kDa  | 1 | 19.09658  | 1           | 0.86666667 | 1.153846154 | 0.866666667 |
| Cluster of Guanin nucleotide-binding protein G(I)/G(S)/G(T) subunit bet GBB1_MOUSE [3]               |                   | 37 kDa  | 1 | 19.08933  | 0.9         | 0.93333333 | 0.964285714 | 1.037037037 |
| 28 kDa heat- and acid-stable phosphoprotein OS=Mus musculus GN=PdaHAP28_MOUSE                        |                   | 21 kDa  | 1 | 21.498288 | 0.933333333 | 0.96666667 | 0.965517241 | 1.035714286 |
| Integrin-linked protein kinase OS=Mus musculus GN=Ilk PE=1 SV=2                                      | ILK_MOUSE         | 51 kDa  | 1 | 18.765989 | 0.933333333 | 1.06666667 | 0.875       | 1.142857143 |
| Lamin-B2 OS=Mus musculus GN=Lmnb2 PE=1 SV=2                                                          | LMNB2_MOUSE       | 67 kDa  | 1 | 20.714954 | 0.96666667  | 0.96666667 | 1           | 1           |
| Leiomodlin-2 OS=Mus musculus GN=Lmod2 PE=1 SV=1                                                      | LMOD2_MOUSE       | 62 kDa  | 1 | 20.798174 | 1           | 0.93333333 | 1.071428571 | 0.933333333 |
| Nidogen-2 OS=Mus musculus GN=Nid2 PE=1 SV=2                                                          | NID2_MOUSE        | 154 kDa | 1 | 19.596416 | 0.9         | 0.83333333 | 1.08        | 0.925925926 |
| 2-oxoisovalerate dehydrogenase subunit beta, mitochondrial OS=Mus musculus GN=ODBB_MOUSE             |                   | 43 kDa  | 1 | 28.30552  | 1.1         | 1.3        | 0.846153846 | 1.181818182 |
| Ubiquitin carboxyl-terminal hydrolase OS=Mus musculus GN=Usp5 PE=2 Q3U4W8_MOUSE (+1)                 |                   | 93 kDa  | 1 | 19.243039 | 1.033333333 | 1.03333333 | 1           | 1           |
| 60S ribosomal protein L14 OS=Mus musculus GN=Rpl14 PE=2 SV=3                                         | RL14_MOUSE        | 24 kDa  | 1 | 20.452224 | 0.96666667  | 1.06666667 | 0.90625     | 1.103448276 |
| Saccharopine dehydrogenase-like oxidoreductase OS=Mus musculus GN=SCPD_MOUSE                         |                   | 47 kDa  | 1 | 20.398413 | 0.933333333 | 1          | 0.933333333 | 1.071428571 |
| Cluster of RNA-binding motif protein, X chromosome OS=Mus musculus GN=RBMX_MOUSE [2]                 |                   | 42 kDa  | 1 | 0         | #VALUE!     | #VALUE!    | #VALUE!     | #VALUE!     |
| E3 ubiquitin-protein ligase HUWE1 OS=Mus musculus GN=Huwe1 PE=2 SA2AFQ0_MOUSE (+1)                   |                   | 483 kDa | 1 | 8.777281  | 1.25        | 1.1        | 1.136363636 | 0.88        |

|                                                                                         |              |         |   |           |            |            |             |             |
|-----------------------------------------------------------------------------------------|--------------|---------|---|-----------|------------|------------|-------------|-------------|
| Epiplakin OS=Mus musculus GN=Eppk1 PE=1 SV=2                                            | EPIPL_MOUSE  | 725 kDa | 1 | 7.839395  | 1.1        | 1          | 1.1         | 0.909090909 |
| Cluster of Protein Gm20459 (Fragment) OS=Mus musculus GN=Gm20459 F7AA26_MOUSE           |              | 126 kDa | 1 | 23.547421 | 0.9        | 0.86666667 | 1.038461538 | 0.962962963 |
| Fermitin family homolog 2 OS=Mus musculus GN=Fermt2 PE=1 SV=1                           | FERM2_MOUSE  | 78 kDa  | 1 | 19.194897 | 1          | 1          | 1           | 1           |
| Peptidyl-prolyl cis-trans isomerase FKBP3 OS=Mus musculus GN=Fkbp3 FFKBP3_MOUSE         |              | 25 kDa  | 1 | 22.717509 | 0.96666667 | 1.03333333 | 0.935483871 | 1.068965517 |
| Heat shock protein beta-8 OS=Mus musculus GN=Hspb8 PE=1 SV=1                            | HSPB8_MOUSE  | 22 kDa  | 1 | 25.103754 | 0.7        | 0.63333333 | 1.105263158 | 0.904761905 |
| Methionine-R-sulfoxide reductase B2, mitochondrial OS=Mus musculus (MSRB2_MOUSE         |              | 19 kDa  | 1 | 22.051401 | 1          | 1.16666667 | 0.857142857 | 1.16666667  |
| Methylthioribulose-1-phosphate dehydratase OS=Mus musculus GN=ApiMTNB_MOUSE             |              | 27 kDa  | 1 | 24.600796 | 0.9        | 0.9        | 1           | 1           |
| Neutral cholesterol ester hydrolase 1 OS=Mus musculus GN=Nceh1 PE=1 NCEH1_MOUSE         |              | 46 kDa  | 1 | 24.709389 | 0.9        | 1.1        | 0.818181818 | 1.222222222 |
| Cytochrome b-c1 complex subunit 9 OS=Mus musculus GN=Uqcr10 PE=1 QCR9_MOUSE             |              | 7 kDa   | 1 | 33.775008 | 0.93333333 | 0.9        | 1.037037037 | 0.964285714 |
| 60S ribosomal protein L28 OS=Mus musculus GN=Rpl28 PE=1 SV=2                            | RL28_MOUSE   | 16 kDa  | 1 | 20.580837 | 0.93333333 | 1.13333333 | 0.823529412 | 1.214285714 |
| 60S acidic ribosomal protein P2 OS=Mus musculus GN=Rplp2 PE=1 SV=3                      | RLA2_MOUSE   | 12 kDa  | 1 | 23.697786 | 0.93333333 | 0.93333333 | 1           | 1           |
| Sepiapterin reductase OS=Mus musculus GN=Spr PE=1 SV=1                                  | SPRE_MOUSE   | 28 kDa  | 1 | 22.759809 | 0.93333333 | 0.93333333 | 1           | 1           |
| Mitochondrial import inner membrane translocase subunit Tim9 OS=Mu TIM9_MOUSE           |              | 10 kDa  | 1 | 22.122115 | 0.9        | 0.8        | 1.125       | 0.888888889 |
| DNA topoisomerase 2-binding protein 1 OS=Mus musculus GN=Topbp1 FTOPB1_MOUSE            |              | 169 kDa | 1 | 7.389074  | 1.3        | 1.2        | 1.083333333 | 0.923076923 |
| Hsp90 co-chaperone Cdc37 OS=Mus musculus GN=Cdc37 PE=2 SV=1                             | CDC37_MOUSE  | 45 kDa  | 1 | 22.648026 | 0.96666667 | 1          | 0.96666667  | 1.034482759 |
| Collagen alpha-1(VI) chain OS=Mus musculus GN=Col6a1 PE=2 SV=1                          | CO6A1_MOUSE  | 108 kDa | 1 | 20.672217 | 1.6        | 1.16666667 | 1.371428571 | 0.729166667 |
| Catenin alpha-3 OS=Mus musculus GN=Ctnna3 PE=1 SV=2                                     | CTNA3_MOUSE  | 100 kDa | 1 | 20.69261  | 1.1        | 1.13333333 | 0.970588235 | 1.03030303  |
| Dnaj homolog subfamily A member 4 OS=Mus musculus GN=Dnaja4 PE= DNJA4_MOUSE             |              | 45 kDa  | 1 | 19.615111 | 0.83333333 | 0.86666667 | 0.961538462 | 1.04        |
| Ubiquitin carboxyl-terminal hydrolase OS=Mus musculus GN=Usp14 PE= E9PYI8_MOUSE (+1)    |              | 52 kDa  | 1 | 15.679699 | 0.83333333 | 0.93333333 | 0.892857143 | 1.12        |
| Protein phosphatase 1 regulatory subunit 7 OS=Mus musculus GN=Ppp1 PP1R7_MOUSE          |              | 41 kDa  | 1 | 22.430208 | 0.93333333 | 1          | 0.93333333  | 1.071428571 |
| Peptidyl-prolyl cis-trans isomerase D OS=Mus musculus GN=Ppid PE=1 SIPPID_MOUSE         |              | 41 kDa  | 1 | 20.181602 | 0.8        | 0.93333333 | 0.857142857 | 1.16666667  |
| Protein phosphatase 1 regulatory subunit 3A OS=Mus musculus GN=Ppp PPR3A_MOUSE          |              | 121 kDa | 1 | 22.580025 | 1.16666667 | 1.13333333 | 1.029411765 | 0.971428571 |
| Proteasome subunit alpha type-4 OS=Mus musculus GN=Psm4 PE=1 SV PSA4_MOUSE              |              | 29 kDa  | 1 | 19.142711 | 0.96666667 | 1.03333333 | 0.935483871 | 1.068965517 |
| MCG49183 OS=Mus musculus GN=1700009N14Rik PE=2 SV=1                                     | Q14AA6_MOUSE | 24 kDa  | 1 | 19.93299  | 0.96666667 | 1.06666667 | 0.90625     | 1.103448276 |
| 39S ribosomal protein L12, mitochondrial OS=Mus musculus GN=Mrpl12 RM12_MOUSE           |              | 22 kDa  | 1 | 22.030129 | 0.96666667 | 1          | 0.96666667  | 1.034482759 |
| 40S ribosomal protein S10 OS=Mus musculus GN=Rps10 PE=1 SV=1                            | RS10_MOUSE   | 19 kDa  | 1 | 19.704197 | 0.86666667 | 0.93333333 | 0.928571429 | 1.076923077 |
| Mitochondrial import inner membrane translocase subunit Tim10 OS=M TIM10_MOUSE          |              | 10 kDa  | 1 | 21.041359 | 0.93333333 | 0.83333333 | 1.12        | 0.892857143 |
| Cluster of Alcohol dehydrogenase class-3 OS=Mus musculus GN=Adh5 P1ADHX_MOUSE           |              | 40 kDa  | 1 | 18.639775 | 1          | 1.06666667 | 0.9375      | 1.06666667  |
| Cluster of Uncharacterized protein C6orf203 homolog OS=Mus musculus CF203_MOUSE         |              | 28 kDa  | 1 | 13.368917 | 1          | 1          | 1           | 1           |
| Cluster of CLIP-associating protein 1 OS=Mus musculus GN=Clasp1 PE=1 CLAP1_MOUSE [4]    |              | 169 kDa | 1 | 0         | #VALUE!    | #VALUE!    | #VALUE!     | #VALUE!     |
| A-kinase anchor protein 12 OS=Mus musculus GN=Akap12 PE=1 SV=1                          | AKA12_MOUSE  | 181 kDa | 1 | 13.402957 | 1.1        | 0.93333333 | 1.178571429 | 0.848484848 |
| ATP synthase subunit g, mitochondrial OS=Mus musculus GN=Atp5l PE=1 ATP5L_MOUSE         |              | 11 kDa  | 1 | 25.810304 | 1.03333333 | 0.96666667 | 1.068965517 | 0.935483871 |
| Hexaprenyldihydroxybenzoate methyltransferase, mitochondrial OS=Mu COQ3_MOUSE           |              | 41 kDa  | 1 | 20.169699 | 1.06666667 | 0.96666667 | 1.103448276 | 0.90625     |
| Guanine nucleotide-binding protein subunit beta-2-like 1 OS=Mus musculus GBLP_MOUSE     |              | 35 kDa  | 1 | 13.563631 | 0.96666667 | 1          | 0.96666667  | 1.034482759 |
| Heterogeneous nuclear ribonucleoproteins C1/C2 OS=Mus musculus GN=HNRPC_MOUSE           |              | 34 kDa  | 1 | 24.259953 | 0.93333333 | 0.93333333 | 1           | 1           |
| Heat shock protein beta-7 OS=Mus musculus GN=Hspb7 PE=1 SV=3                            | HSPB7_MOUSE  | 19 kDa  | 1 | 21.637957 | 0.93333333 | 0.83333333 | 1.12        | 0.892857143 |
| Cluster of LIM and SH3 domain protein 1 OS=Mus musculus GN=Lasp1 PILASP1_MOUSE          |              | 30 kDa  | 1 | 19.586591 | 0.86666667 | 0.9        | 0.962962963 | 1.038461538 |
| Methyl-CpG-binding protein 2 OS=Mus musculus GN=Mecp2 PE=1 SV=1                         | MECP2_MOUSE  | 52 kDa  | 1 | 20.43711  | 1.16666667 | 1.03333333 | 1.129032258 | 0.885714286 |
| Mitochondrial-processing peptidase subunit alpha OS=Mus musculus GNMPPA_MOUSE           |              | 58 kDa  | 1 | 20.922571 | 0.96666667 | 1.06666667 | 0.90625     | 1.103448276 |
| Na(+)/H(+) exchange regulatory cofactor NHE-RF2 OS=Mus musculus GN=NHRF2_MOUSE          |              | 37 kDa  | 1 | 25.001833 | 0.93333333 | 0.83333333 | 1.12        | 0.892857143 |
| Perilipin-3 OS=Mus musculus GN=Plin3 PE=1 SV=1                                          | PLIN3_MOUSE  | 47 kDa  | 1 | 13.871408 | 0.9        | 0.96666667 | 0.931034483 | 1.074074074 |
| Polyribonucleotide nucleotidyltransferase 1, mitochondrial OS=Mus musculus PNPT1_MOUSE  |              | 86 kDa  | 1 | 20.113301 | 1.03333333 | 1.03333333 | 1           | 1           |
| 26S protease regulatory subunit 6B OS=Mus musculus GN=Psmc4 PE=1 SPRS6B_MOUSE           |              | 47 kDa  | 1 | 19.655745 | 0.9        | 0.96666667 | 0.931034483 | 1.074074074 |
| 60S ribosomal protein L23 OS=Mus musculus GN=Rpl23 PE=1 SV=1                            | RL23_MOUSE   | 15 kDa  | 1 | 21.473497 | 0.86666667 | 0.96666667 | 0.896551724 | 1.115384615 |
| 60S ribosomal protein L35a OS=Mus musculus GN=Rpl35a PE=2 SV=2                          | RL35A_MOUSE  | 13 kDa  | 1 | 21.747069 | 0.96666667 | 1.06666667 | 0.90625     | 1.103448276 |
| Cluster of Septin-11 OS=Mus musculus GN=Sept11 PE=1 SV=4 (SEP11_M SEPT11_MOUSE [6])     |              | 50 kDa  | 1 | 108.40056 | 0.9        | 1.25       | 0.72        | 1.388888889 |
| Sulfite oxidase, mitochondrial OS=Mus musculus GN=Suox PE=1 SV=2                        | SUOX_MOUSE   | 61 kDa  | 1 | 20.132692 | 1.26666667 | 1.16666667 | 1.085714286 | 0.921052632 |
| Lysine--tRNA ligase OS=Mus musculus GN=Kars PE=1 SV=1                                   | SYK_MOUSE    | 68 kDa  | 1 | 23.019235 | 1.03333333 | 1.03333333 | 1           | 1           |
| Telethonin OS=Mus musculus GN=Tcap PE=2 SV=1                                            | TELT_MOUSE   | 19 kDa  | 1 | 22.621821 | 0.86666667 | 0.9        | 0.962962963 | 1.038461538 |
| Cluster of Heterogeneous nuclear ribonucleoprotein A3 OS=Mus musculus A2AL12_MOUSE      |              | 34 kDa  | 1 | 23.40577  | 0.93333333 | 0.96666667 | 0.965517241 | 1.035714286 |
| Cluster of Isobutyryl-CoA dehydrogenase, mitochondrial OS=Mus musculus D3YTT4_MOUSE [2] |              | 45 kDa  | 1 | 0         | 0.9        | 1.1        | 0.818181818 | 1.222222222 |
| Cysteine-rich protein 1 OS=Mus musculus GN=Crip1 PE=2 SV=2                              | CRIP1_MOUSE  | 9 kDa   | 1 | 12.790304 | 0.9        | 0.9        | 1           | 1           |
| Cytoplasmic dynein 1 light intermediate chain 1 OS=Mus musculus GN=LDC1L1_MOUSE         |              | 57 kDa  | 1 | 20.611545 | 0.9        | 0.9        | 1           | 1           |

|                                                                                       |         |   |           |            |            |             |             |
|---------------------------------------------------------------------------------------|---------|---|-----------|------------|------------|-------------|-------------|
| Protein-L-isoaspartate O-methyltransferase OS=Mus musculus GN=Pcmt E0CYV0_MOUSE       | 30 kDa  | 1 | 20.631564 | 0.96666667 | 0.96666667 | 1           | 1           |
| Glutaredoxin-3 OS=Mus musculus GN=Glrx3 PE=1 SV=1                                     | 38 kDa  | 1 | 23.934983 | 0.93333333 | 1.06666667 | 0.875       | 1.142857143 |
| Histidine triad nucleotide-binding protein 1 OS=Mus musculus GN=Hint1 HINT1_MOUSE     | 14 kDa  | 1 | 20.99829  | 0.9        | 0.9        | 1           | 1           |
| Monocarboxylate transporter 1 OS=Mus musculus GN=Slc16a1 PE=1 SV=1                    | 53 kDa  | 1 | 17.699026 | 1.16666667 | 1.2        | 0.972222222 | 1.028571429 |
| Myopalladin OS=Mus musculus GN=Mypn PE=2 SV=2                                         | 144 kDa | 1 | 13.982381 | 0.95       | 0.9        | 1.055555556 | 0.947368421 |
| Programmed cell death protein 5 OS=Mus musculus GN=Pcdc5 PE=1 SV=1                    | 14 kDa  | 1 | 22.232324 | 0.8        | 0.86666667 | 0.923076923 | 1.083333333 |
| Bisphosphoglycerate mutase OS=Mus musculus GN=Bpgm PE=2 SV=2                          | 30 kDa  | 1 | 20.265861 | 1.1        | 1.06666667 | 1.03125     | 0.96969697  |
| Rab11 family-interacting protein 5 OS=Mus musculus GN=Rab11fip5 PE=1 SV=1             | 70 kDa  | 1 | 8.03983   | 0.9        | 0.8        | 1.125       | 0.888888889 |
| Cluster of 60S ribosomal protein L18a OS=Mus musculus GN=Rpl18a PE=1 SV=1             | 21 kDa  | 1 | 19.572401 | 0.93333333 | 1.1        | 0.848484848 | 1.178571429 |
| 40S ribosomal protein S13 OS=Mus musculus GN=Rps13 PE=1 SV=2                          | 17 kDa  | 1 | 20.580417 | 0.93333333 | 1.2        | 0.777777778 | 1.285714286 |
| 40S ribosomal protein S14 OS=Mus musculus GN=Rps14 PE=2 SV=3                          | 16 kDa  | 1 | 20.842785 | 0.9        | 1.13333333 | 0.794117647 | 1.259259259 |
| 40S ribosomal protein S19 OS=Mus musculus GN=Rps19 PE=1 SV=3                          | 16 kDa  | 1 | 21.060506 | 0.83333333 | 1          | 0.833333333 | 1.2         |
| Glycine--tRNA ligase OS=Mus musculus GN=Gars PE=1 SV=1                                | 82 kDa  | 1 | 22.06463  | 0.73333333 | 0.73333333 | 1           | 1           |
| Translationally-controlled tumor protein OS=Mus musculus GN=Tpt1 PE=1 SV=1            | 19 kDa  | 1 | 21.517941 | 0.83333333 | 0.86666667 | 0.961538462 | 1.04        |
| 40S ribosomal protein S24 OS=Mus musculus GN=Rps24 PE=1 SV=1                          | 15 kDa  | 1 | 21.148951 | 1          | 1.03333333 | 0.967741935 | 1.033333333 |
| Cluster of AP-2 complex subunit beta OS=Mus musculus GN=Ap2b1 PE=1 SV=1               | 105 kDa | 1 | 6.0669415 | 0.95       | 1.05       | 0.904761905 | 1.105263158 |
| Cluster of MCG19772 OS=Mus musculus GN=Trim55 PE=4 SV=1                               | 60 kDa  | 1 | 32.559413 | 0.9        | 0.9        | 1           | 1           |
| Cluster of Protein 4.1 OS=Mus musculus GN=Epb41 PE=1 SV=2                             | 96 kDa  | 1 | 13.122292 | 0.95       | 0.9        | 1.055555556 | 0.947368421 |
| Cluster of S-phase kinase-associated protein 1 OS=Mus musculus GN=Skp1 SKP1_MOUSE [2] | 19 kDa  | 1 | 34.322676 | 0.9        | 0.85       | 1.058823529 | 0.944444444 |
| Alpha-1-syntrophin OS=Mus musculus GN=Snta1 PE=2 SV=1                                 | 53 kDa  | 1 | 18.858515 | 0.96666667 | 1          | 0.966666667 | 1.034482759 |
| Apolipoprotein O-like OS=Mus musculus GN=Apool PE=2 SV=1                              | 29 kDa  | 1 | 18.517558 | 1          | 1.06666667 | 0.9375      | 1.066666667 |
| Bcl-2-like protein 13 OS=Mus musculus GN=Bcl2l13 PE=1 SV=2                            | 47 kDa  | 1 | 23.093916 | 0.96666667 | 0.96666667 | 1           | 1           |
| Adenylyl cyclase-associated protein 2 OS=Mus musculus GN=Cap2 PE=1 SV=1               | 53 kDa  | 1 | 19.970213 | 0.93333333 | 1          | 0.933333333 | 1.071428571 |
| Cathepsin B OS=Mus musculus GN=Ctsb PE=1 SV=2                                         | 37 kDa  | 1 | 23.252524 | 0.8        | 0.76666667 | 1.043478261 | 0.958333333 |
| Collagen alpha-1(I) chain OS=Mus musculus GN=Col1a1 PE=1 SV=4                         | 138 kDa | 1 | 19.584481 | 1.73333333 | 1          | 1.733333333 | 0.576923077 |
| 2-methoxy-6-polyprenyl-1,4-benzoquinol methylase, mitochondrial OS=1 COQ5_MOUSE       | 37 kDa  | 1 | 22.51319  | 1.06666667 | 1.06666667 | 1           | 1           |
| CapZ-interacting protein OS=Mus musculus GN=Rcsd1 PE=2 SV=1                           | 44 kDa  | 1 | 14.128383 | 1.2        | 1.15       | 1.043478261 | 0.958333333 |
| Dynactin subunit 1 OS=Mus musculus GN=Dctn1 PE=1 SV=3                                 | 142 kDa | 1 | 19.852781 | 0.96666667 | 0.93333333 | 1.035714286 | 0.965517241 |
| Probable rRNA-processing protein EBP2 OS=Mus musculus GN=Ebna1bp EBP2_MOUSE           | 35 kDa  | 1 | 9.431601  | 0.8        | 1          | 0.8         | 1.25        |
| Glyoxylate reductase/hydroxypyruvate reductase OS=Mus musculus GN=GRHPR_MOUSE         | 35 kDa  | 1 | 20.150286 | 0.83333333 | 0.86666667 | 0.961538462 | 1.04        |
| Kynurenine--oxoglutarate transaminase 3 OS=Mus musculus GN=Ccbl2 PKAT3_MOUSE          | 51 kDa  | 1 | 22.943507 | 1          | 0.96666667 | 1.034482759 | 0.966666667 |
| NADP-dependent malic enzyme OS=Mus musculus GN=Me1 PE=1 SV=2                          | 64 kDa  | 1 | 20.700599 | 0.96666667 | 1.03333333 | 0.935483871 | 1.068965517 |
| Endonuclease G, mitochondrial OS=Mus musculus GN=Endog PE=2 SV=1                      | 32 kDa  | 1 | 25.602296 | 1          | 0.93333333 | 1.071428571 | 0.933333333 |
| Cluster of Oxidoreductase NAD-binding domain-containing protein 1 OS=OXND1_MOUSE      | 35 kDa  | 1 | 19.868736 | 0.86666667 | 0.93333333 | 0.928571429 | 1.076923077 |
| [Pyruvate dehydrogenase [lipoamide]] kinase isozyme 1, mitochondrial OS=PKAT1_MOUSE   | 49 kDa  | 1 | 22.547674 | 1.06666667 | 1.03333333 | 1.032258065 | 0.96875     |
| Peptidyl-prolyl cis-trans isomerase B OS=Mus musculus GN=Ppib PE=2 SV=1               | 24 kDa  | 1 | 20.058267 | 0.96666667 | 1.06666667 | 0.90625     | 1.103448276 |
| Presequence protease, mitochondrial OS=Mus musculus GN=Pitrm1 PE=1 SV=1               | 117 kDa | 1 | 20.873213 | 1          | 0.96666667 | 1.034482759 | 0.966666667 |
| 26S proteasome non-ATPase regulatory subunit 3 OS=Mus musculus GN=PSMD3_MOUSE         | 61 kDa  | 1 | 22.767472 | 1.1        | 1.13333333 | 0.970588235 | 1.03030303  |
| Protein Prob1 (Fragment) OS=Mus musculus GN=Prob1 PE=2 SV=1                           | 106 kDa | 1 | 24.151386 | 1.03333333 | 0.86666667 | 1.192307692 | 0.838709677 |
| 60S ribosomal protein L18 OS=Mus musculus GN=Rpl18 PE=2 SV=3                          | 22 kDa  | 1 | 23.327418 | 0.93333333 | 1.06666667 | 0.875       | 1.142857143 |
| Heterogeneous nuclear ribonucleoprotein A/B OS=Mus musculus GN=Hr ROAA_MOUSE          | 31 kDa  | 1 | 13.051207 | 0.93333333 | 0.93333333 | 1           | 1           |
| 28S ribosomal protein S36, mitochondrial OS=Mus musculus GN=Mrrps3 RT36_MOUSE         | 11 kDa  | 1 | 21.241741 | 0.96666667 | 0.86666667 | 1.115384615 | 0.896551724 |
| Transgelin-2 OS=Mus musculus GN=Tagln2 PE=1 SV=4                                      | 22 kDa  | 1 | 22.378351 | 0.86666667 | 1          | 0.866666667 | 1.153846154 |
| Vesicle-associated membrane protein-associated protein A OS=Mus mus VAPA_MOUSE        | 28 kDa  | 1 | 20.856927 | 1.03333333 | 1          | 1.033333333 | 0.967741935 |
| Vacuolar protein sorting-associated protein 35 OS=Mus musculus GN=Vps35_MOUSE         | 92 kDa  | 1 | 23.056203 | 0.9        | 1.03333333 | 0.870967742 | 1.148148148 |
| Zyxin OS=Mus musculus GN=Zyx PE=1 SV=2                                                | 61 kDa  | 1 | 19.204547 | 0.83333333 | 0.76666667 | 1.086956522 | 0.92        |
| Serine/threonine-protein kinase mTOR OS=Mus musculus GN=Mtor PE=1 SV=1                | 289 kDa | 1 | 8.845222  | 1.1        | 1.2        | 0.916666667 | 1.090909091 |
| Reticulon-4-interacting protein 1, mitochondrial OS=Mus musculus GN=FRT4I1_MOUSE      | 43 kDa  | 1 | 19.890244 | 0.83333333 | 0.9        | 0.925925926 | 1.08        |
| Fatty acid-binding protein, epidermal OS=Mus musculus GN=Fabp5 PE=1 SV=1              | 15 kDa  | 1 | 20.860764 | 0.96666667 | 0.96666667 | 1           | 1           |
| Cluster of ADP-ribosylation factor 3 OS=Mus musculus GN=Arf3 PE=2 SV=1                | 21 kDa  | 1 | 22.28918  | 0.96666667 | 1.13333333 | 0.852941176 | 1.172413793 |
| Cluster of Protein Zim1 OS=Mus musculus GN=Zim1 PE=2 SV=1                             | 65 kDa  | 1 | 9.078467  | 1.6        | 1.4        | 1.142857143 | 0.875       |
| Alcohol dehydrogenase [NADP(+)] OS=Mus musculus GN=Akr1a1 PE=1 SV=1                   | 37 kDa  | 1 | 13.325784 | 0.8        | 0.9        | 0.888888889 | 1.125       |
| Annexin A7 OS=Mus musculus GN=Anxa7 PE=2 SV=2                                         | 50 kDa  | 1 | 19.596723 | 0.93333333 | 0.9        | 1.037037037 | 0.964285714 |

|                                                                                           |         |   |           |             |             |             |             |
|-------------------------------------------------------------------------------------------|---------|---|-----------|-------------|-------------|-------------|-------------|
| Aflatoxin B1 aldehyde reductase member 2 OS=Mus musculus GN=Akr7zARK72_MOUSE              | 41 kDa  | 1 | 20.213675 | 1.033333333 | 1.066666667 | 0.96875     | 1.032258065 |
| Cellular nucleic acid-binding protein OS=Mus musculus GN=Cnbp PE=2 S'CNBP_MOUSE           | 20 kDa  | 1 | 12.88657  | 0.833333333 | 0.8         | 1.041666667 | 0.96        |
| Cluster of Anamorsin OS=Mus musculus GN=Ciapi1 PE=1 SV=1 (CPIN1_ICPIN1_MOUSE [2])         | 33 kDa  | 1 | 0         | 1.3         | 1           | 1.3         | 0.769230769 |
| Peroxisomal multifunctional enzyme type 2 OS=Mus musculus GN=Hsd1 DHB4_MOUSE              | 79 kDa  | 1 | 20.132968 | 0.9         | 0.866666667 | 1.038461538 | 0.962962963 |
| Eukaryotic translation initiation factor 3 subunit J-A OS=Mus musculus G EI3JA_MOUSE (+1) | 29 kDa  | 1 | 12.711407 | 0.966666667 | 0.966666667 | 1           | 1           |
| Protein FAM136A OS=Mus musculus GN=Fam136a PE=1 SV=1                                      | 16 kDa  | 1 | 19.216055 | 0.9         | 0.8         | 1.125       | 0.888888889 |
| Protocadherin Fat 4 OS=Mus musculus GN=Fat4 PE=1 SV=2                                     | 540 kDa | 1 | 8.07646   | 0.9         | 0.9         | 1           | 1           |
| Acyl-protein thioesterase 1 OS=Mus musculus GN=Lyp1a1 PE=4 SV=1                           | 24 kDa  | 1 | 19.768785 | 1.033333333 | 1           | 1.033333333 | 0.967741935 |
| Adenylate kinase isoenzyme 4, mitochondrial OS=Mus musculus GN=Ak4KAD4_MOUSE              | 25 kDa  | 1 | 19.061822 | 1           | 1.066666667 | 0.9375      | 1.066666667 |
| Leukotriene A-4 hydrolase OS=Mus musculus GN=Lta4h PE=1 SV=4                              | 69 kDa  | 1 | 20.320016 | 0.933333333 | 1.1         | 0.848484848 | 1.178571429 |
| Protein Sptbn2 OS=Mus musculus GN=Sptbn2 PE=2 SV=1                                        | 271 kDa | 1 | 0         | #VALUE!     | #VALUE!     | #VALUE!     | #VALUE!     |
| Ankycorbin OS=Mus musculus GN=Rai14 PE=1 SV=1                                             | 109 kDa | 1 | 9.875215  | 1.6         | 1.3         | 1.230769231 | 0.8125      |
| 60S ribosomal protein L37 OS=Mus musculus GN=Rpl37 PE=2 SV=3                              | 11 kDa  | 1 | 21.650548 | 0.933333333 | 1.066666667 | 0.875       | 1.142857143 |
| 28S ribosomal protein S22, mitochondrial OS=Mus musculus GN=Mrps2;RT22_MOUSE              | 41 kDa  | 1 | 22.052878 | 0.966666667 | 0.933333333 | 1.035714286 | 0.965517241 |
| Gamma-synuclein OS=Mus musculus GN=Sncg PE=1 SV=1                                         | 13 kDa  | 1 | 20.362706 | 0.966666667 | 0.866666667 | 1.115384615 | 0.896551724 |
| Cluster of Hydroxymethylglutaryl-CoA lyase, mitochondrial OS=Mus mus HMGCL_MOUSE          | 34 kDa  | 1 | 18.725693 | 0.833333333 | 1           | 0.833333333 | 1.2         |
| Myosin Vb, isoform CRA_a OS=Mus musculus GN=Myo5b PE=4 SV=1                               | 213 kDa | 1 | 0         | 1.1         | 1.4         | 0.785714286 | 1.272727273 |
| Cluster of Tripeptidyl-peptidase 2 OS=Mus musculus GN=Tpp2 PE=2 SV=1                      | 140 kDa | 1 | 22.795229 | 1.033333333 | 1           | 1.033333333 | 0.967741935 |
| Cluster of Heat shock 70 kDa protein 12B OS=Mus musculus GN=Hspa12 HS12B_MOUSE            | 76 kDa  | 1 | 27.68449  | 1.033333333 | 1.133333333 | 0.911764706 | 1.096774194 |
| Cluster of Cordon-bleu protein-like 1 OS=Mus musculus GN=Cobl1 PE=4 B1AZ14_MOUSE [2]      | 133 kDa | 1 | 6.2348075 | 1           | 1           | 1           | 1           |
| Proteasomal ubiquitin receptor ADRM1 OS=Mus musculus GN=Adrm1 PIADRM1_MOUSE               | 42 kDa  | 1 | 14.206791 | 0.933333333 | 0.933333333 | 1           | 1           |
| Afamin OS=Mus musculus GN=Afm PE=1 SV=2                                                   | 69 kDa  | 1 | 14.964652 | 0.95        | 0.9         | 1.055555556 | 0.947368421 |
| Isoaspartyl peptidase/L-asparaginase OS=Mus musculus GN=Asrgl1 PE=1 ASGL1_MOUSE           | 34 kDa  | 1 | 21.772133 | 0.966666667 | 1           | 0.966666667 | 1.034482759 |
| C-1-tetrahydrofolate synthase, cytoplasmic OS=Mus musculus GN=Mthfc1CTC_MOUSE             | 101 kDa | 1 | 19.917217 | 0.9         | 0.933333333 | 0.964285714 | 1.037037037 |
| UPF0598 protein C8orf82 homolog OS=Mus musculus PE=2 SV=1                                 | 24 kDa  | 1 | 25.05142  | 1.1         | 1.1         | 1           | 1           |
| Putative ATP-dependent Clp protease proteolytic subunit, mitochondrial CLPP_MOUSE         | 30 kDa  | 1 | 23.712501 | 1           | 0.9         | 1.111111111 | 0.9         |
| Dynactin subunit 2 OS=Mus musculus GN=Dctn2 PE=1 SV=3                                     | 44 kDa  | 1 | 19.540466 | 0.9         | 0.933333333 | 0.964285714 | 1.037037037 |
| DnaJ homolog subfamily A member 3, mitochondrial OS=Mus musculus (DNJA3_MOUSE             | 52 kDa  | 1 | 13.613428 | 0.966666667 | 0.9         | 1.074074074 | 0.931034483 |
| Dystrobrevin alpha OS=Mus musculus GN=Dtna PE=1 SV=2                                      | 84 kDa  | 1 | 20.592918 | 1.1         | 1.133333333 | 0.970588235 | 1.03030303  |
| Glycerol-3-phosphate dehydrogenase [NAD(+)], cytoplasmic OS=Mus muGPDA_MOUSE              | 38 kDa  | 1 | 20.214844 | 1           | 0.966666667 | 1.034482759 | 0.966666667 |
| Glutathione reductase, mitochondrial OS=Mus musculus GN=Gsr PE=2 S'GSHR_MOUSE (+1)        | 54 kDa  | 1 | 22.370468 | 0.9         | 1           | 0.9         | 1.111111111 |
| High mobility group protein HMG-I/HMG-Y OS=Mus musculus GN=HmgaHMG1_MOUSE                 | 12 kDa  | 1 | 19.789056 | 1.066666667 | 1.233333333 | 0.864864865 | 1.15625     |
| Protein Dnahc7b OS=Mus musculus GN=Dnahc7b PE=4 SV=1                                      | 467 kDa | 1 | 6.6763125 | 1.1         | 1.1         | 1           | 1           |
| NAD(P)H dehydrogenase [quinone] 1 OS=Mus musculus GN=Nqo1 PE=1                            | 31 kDa  | 1 | 20.030507 | 1.066666667 | 1           | 1.066666667 | 0.9375      |
| Prolyl endopeptidase OS=Mus musculus GN=Prep PE=2 SV=1                                    | 81 kDa  | 1 | 19.253922 | 0.933333333 | 1           | 0.933333333 | 1.071428571 |
| Proline synthase co-transcribed bacterial homolog protein OS=Mus mus PROSC_MOUSE          | 30 kDa  | 1 | 19.280142 | 0.966666667 | 0.966666667 | 1           | 1           |
| Vesicle-associated membrane protein, associated protein B and C OS=M Q8BH80_MOUSE (+1)    | 27 kDa  | 1 | 19.892752 | 1           | 0.966666667 | 1.034482759 | 0.966666667 |
| Cortactin, isoform CRA_a OS=Mus musculus GN=Cttn PE=2 SV=1                                | 57 kDa  | 1 | 19.282375 | 0.9         | 0.866666667 | 1.038461538 | 0.962962963 |
| 60S ribosomal protein L21 OS=Mus musculus GN=Rpl21 PE=2 SV=1                              | 19 kDa  | 1 | 19.619861 | 0.9         | 1.066666667 | 0.84375     | 1.185185185 |
| 60S ribosomal protein L26 OS=Mus musculus GN=Rpl26 PE=2 SV=1                              | 17 kDa  | 1 | 21.264353 | 0.833333333 | 0.933333333 | 0.892857143 | 1.12        |
| 60S ribosomal protein L27a OS=Mus musculus GN=Rpl27a PE=2 SV=5                            | 17 kDa  | 1 | 14.853887 | 0.9         | 1.233333333 | 0.72972973  | 1.37037037  |
| 40S ribosomal protein S16 OS=Mus musculus GN=Rps16 PE=2 SV=4                              | 16 kDa  | 1 | 20.263481 | 0.9         | 1.066666667 | 0.84375     | 1.185185185 |
| Splicing factor, proline- and glutamine-rich OS=Mus musculus GN=Sfpq PSFPQ_MOUSE          | 75 kDa  | 1 | 12.100717 | 1.033333333 | 0.966666667 | 1.068965517 | 0.935483871 |
| Serine/arginine-rich splicing factor 7 OS=Mus musculus GN=Srsf7 PE=1 S'SRSF7_MOUSE (+2)   | 31 kDa  | 1 | 21.474414 | 1.033333333 | 0.866666667 | 1.192307692 | 0.838709677 |
| Ubiquitin-conjugating enzyme E2 L3 OS=Mus musculus GN=Ube2l3 PE=2 UB2L3_MOUSE             | 18 kDa  | 1 | 19.088286 | 0.966666667 | 0.933333333 | 1.035714286 | 0.965517241 |
| Cluster of 60S ribosomal protein L17 OS=Mus musculus GN=Rpl17 PE=2 Q6ZWZ7_MOUSE           | 21 kDa  | 1 | 20.45026  | 0.866666667 | 1.166666667 | 0.742857143 | 1.346153846 |
| Cluster of Collagen alpha-1(XV) chain OS=Mus musculus GN=Col15a1 PE=A2AJY2_MOUSE [3]      | 138 kDa | 1 | 0         | #VALUE!     | #VALUE!     | #VALUE!     | #VALUE!     |
| Adiponectin OS=Mus musculus GN=Adipoq PE=1 SV=2                                           | 27 kDa  | 1 | 14.773202 | 1.133333333 | 1.133333333 | 1           | 1           |
| Cluster of Plastin-3 OS=Mus musculus GN=Pls3 PE=2 SV=1 (B1AX58_MOIB1AX58_MOUSE [3])       | 72 kDa  | 1 | 33.637613 | 0.95        | 0.95        | 1           | 1           |
| Valacyclovir hydrolase OS=Mus musculus GN=Bphl PE=2 SV=1                                  | 33 kDa  | 1 | 22.342654 | 0.933333333 | 1           | 0.933333333 | 1.071428571 |
| Cadherin-2 OS=Mus musculus GN=Cdh2 PE=1 SV=2                                              | 100 kDa | 1 | 24.1404   | 1.066666667 | 1           | 1.066666667 | 0.9375      |
| Cullin-associated NEDD8-dissociated protein 1 OS=Mus musculus GN=Ca CAND1_MOUSE           | 136 kDa | 1 | 14.951113 | 1.066666667 | 1.133333333 | 0.941176471 | 1.0625      |
| Carbonyl reductase [NADPH] 1 OS=Mus musculus GN=Cbr1 PE=1 SV=3                            | 31 kDa  | 1 | 20.513207 | 1.033333333 | 0.966666667 | 1.068965517 | 0.935483871 |

|                                                                                             |         |   |           |            |            |             |             |
|---------------------------------------------------------------------------------------------|---------|---|-----------|------------|------------|-------------|-------------|
| Cytochrome c oxidase subunit 7A-related protein, mitochondrial OS=Mus COX7R_MOUSE (+1)      | 12 kDa  | 1 | 16.490257 | 1.1        | 0.93333333 | 1.178571429 | 0.848484848 |
| Catenin beta-1 OS=Mus musculus GN=Ctnnb1 PE=1 SV=1                                          | 85 kDa  | 1 | 21.237233 | 1.03333333 | 1.03333333 | 1           | 1           |
| Microtubule-associated protein RP/EB family member 2 (Fragment) OS=ID3YYK8_MOUSE (+2)       | 29 kDa  | 1 | 22.419862 | 0.86666667 | 0.86666667 | 1           | 1           |
| DNA damage-binding protein 1 OS=Mus musculus GN=Ddb1 PE=1 SV=2                              | 127 kDa | 1 | 15.881756 | 1          | 1.13333333 | 0.882352941 | 1.133333333 |
| Inter alpha-trypsin inhibitor, heavy chain 4 OS=Mus musculus GN=Itih4 PE9PVD2_MOUSE (+2)    | 105 kDa | 1 | 8.14969   | 0.8        | 0.8        | 1           | 1           |
| 26S protease regulatory subunit 10B OS=Mus musculus GN=Psmc6 PE=1 PRS10_MOUSE               | 44 kDa  | 1 | 20.165941 | 0.96666667 | 1.03333333 | 0.935483871 | 1.068965517 |
| 60S ribosomal protein L9 OS=Mus musculus GN=Rpl9 PE=2 SV=2                                  | 22 kDa  | 1 | 24.475066 | 1          | 1.06666667 | 0.9375      | 1.066666667 |
| SRA stem-loop-interacting RNA-binding protein, mitochondrial OS=Mus SLIRP_MOUSE             | 13 kDa  | 1 | 20.00615  | 0.86666667 | 0.9        | 0.962962963 | 1.038461538 |
| Transmembrane protein 109 OS=Mus musculus GN=Tmem109 PE=1 SV= TM109_MOUSE                   | 26 kDa  | 1 | 18.972135 | 1.06666667 | 1.13333333 | 0.941176471 | 1.0625      |
| Tubulin polymerization-promoting protein family member 3 OS=Mus muTPPP3_MOUSE               | 19 kDa  | 1 | 21.023977 | 1.06666667 | 0.93333333 | 1.142857143 | 0.875       |
| Cluster of Hepatoma-derived growth factor OS=Mus musculus GN=Hdgf HDGF_MOUSE [2]            | 26 kDa  | 1 | 12.845804 | 0.8        | 0.95       | 0.842105263 | 1.1875      |
| Alpha-2-antiplasmin OS=Mus musculus GN=Serpinf2 PE=1 SV=1                                   | 55 kDa  | 1 | 20.88888  | 0.93333333 | 0.96666667 | 0.965517241 | 1.035714286 |
| Apolipoprotein B-100 OS=Mus musculus GN=Apob PE=1 SV=1                                      | 509 kDa | 1 | 0         | #VALUE!    | #VALUE!    | #VALUE!     | #VALUE!     |
| Tight junction protein ZO-1 OS=Mus musculus GN=Tjp1 PE=2 SV=1                               | 189 kDa | 1 | 15.30581  | 0.83333333 | 0.8        | 1.041666667 | 0.96        |
| Filamin-binding LIM protein 1 OS=Mus musculus GN=Fblim1 PE=1 SV=2                           | 41 kDa  | 1 | 20.346163 | 0.96666667 | 0.9        | 1.074074074 | 0.931034483 |
| Inorganic pyrophosphatase OS=Mus musculus GN=Ppa1 PE=1 SV=1                                 | 33 kDa  | 1 | 19.44908  | 0.96666667 | 0.96666667 | 1           | 1           |
| UMP-CMP kinase OS=Mus musculus GN=Cmpk1 PE=1 SV=1                                           | 22 kDa  | 1 | 23.167282 | 1.03333333 | 1.1        | 0.939393939 | 1.064516129 |
| Proteasome subunit alpha type-6 OS=Mus musculus GN=Psmc6 PE=1 SV=1                          | 27 kDa  | 1 | 19.01108  | 0.93333333 | 0.96666667 | 0.965517241 | 1.035714286 |
| Protein Tfg OS=Mus musculus GN=Tfg PE=2 SV=1                                                | 43 kDa  | 1 | 20.279233 | 1          | 1.03333333 | 0.967741935 | 1.033333333 |
| Cluster of Isoform 2 of Dynamin-2 OS=Mus musculus GN=Dnm2 (sp P39 sp P39054-2 DYN2_MOUSE [4 | ?       | 1 | 0         | #VALUE!    | #VALUE!    | #VALUE!     | #VALUE!     |
| Calcyclin-binding protein OS=Mus musculus GN=Cacybp PE=1 SV=1                               | 27 kDa  | 1 | 20.03453  | 0.76666667 | 1          | 0.766666667 | 1.304347826 |
| Cluster of Integrin beta-1 OS=Mus musculus GN=Itgb1 PE=1 SV=1 (ITB1_ITB1_MOUSE              | 88 kDa  | 1 | 20.158935 | 1.13333333 | 1.03333333 | 1.096774194 | 0.911764706 |
| Cluster of Ig gamma-2B chain C region OS=Mus musculus GN=Igh-3 PE=1 IGG2B_MOUSE             | 44 kDa  | 1 | 26.013803 | 1.13333333 | 1.16666667 | 0.971428571 | 1.029411765 |
| Cluster of Ribosomal protein L15 OS=Mus musculus GN=Gm10020 PE=3 E9QA22_MOUSE [2]           | 24 kDa  | 1 | 19.697095 | 0.9        | 1          | 0.9         | 1.111111111 |
| 6-phosphogluconate dehydrogenase, decarboxylating OS=Mus musculus 6PGD_MOUSE                | 53 kDa  | 1 | 14.397664 | 1          | 1.1        | 0.909090909 | 1.1         |
| Annexin A11 OS=Mus musculus GN=Anxa11 PE=1 SV=2                                             | 54 kDa  | 1 | 15.379047 | 0.95       | 1          | 0.95        | 1.052631579 |
| Clusterin OS=Mus musculus GN=Clu PE=1 SV=1                                                  | 52 kDa  | 1 | 20.539963 | 0.93333333 | 0.96666667 | 0.965517241 | 1.035714286 |
| Peptidyl-prolyl cis-trans isomerase FKBP4 OS=Mus musculus GN=Fkbp4 FKBP4_MOUSE              | 52 kDa  | 1 | 21.882352 | 1.06666667 | 1.23333333 | 0.864864865 | 1.15625     |
| FUN14 domain-containing protein 2 OS=Mus musculus GN=Fundc2 PE=2 FUND2_MOUSE                | 17 kDa  | 1 | 20.4234   | 1.16666667 | 1.26666667 | 0.921052632 | 1.085714286 |
| Fragile X mental retardation syndrome-related protein 1 OS=Mus muscu FXR1_MOUSE             | 76 kDa  | 1 | 19.4449   | 0.96666667 | 1.03333333 | 0.935483871 | 1.068965517 |
| Ras GTPase-activating protein-binding protein 2 OS=Mus musculus GN=Cg3BP2_MOUSE (+1)        | 54 kDa  | 1 | 6.365376  | 0.75       | 0.85       | 0.882352941 | 1.133333333 |
| Mimecan OS=Mus musculus GN=Ogn PE=2 SV=1                                                    | 34 kDa  | 1 | 18.601571 | 0.93333333 | 1.03333333 | 0.903225806 | 1.107142857 |
| E3 ubiquitin-protein ligase NEDD4 OS=Mus musculus GN=Nedd4 PE=1 SV=NEDD4_MOUSE              | 103 kDa | 1 | 16.120858 | 1          | 1.1        | 0.909090909 | 1.1         |
| Protein kinase C and casein kinase substrate in neurons protein 2 OS=Mt PACN2_MOUSE         | 56 kDa  | 1 | 19.000797 | 0.9        | 0.96666667 | 0.931034483 | 1.074074074 |
| Parathyrosin OS=Mus musculus GN=Ptms PE=2 SV=3                                              | 11 kDa  | 1 | 14.839245 | 0.83333333 | 0.86666667 | 0.961538462 | 1.04        |
| Acp1 protein OS=Mus musculus GN=Acp1 PE=1 SV=1                                              | 18 kDa  | 1 | 18.576245 | 1.2        | 1.5        | 0.8         | 1.25        |
| Ribonuclease inhibitor OS=Mus musculus GN=Rnh1 PE=1 SV=1                                    | 50 kDa  | 1 | 18.973845 | 0.93333333 | 1.1        | 0.848484848 | 1.178571429 |
| Spartin OS=Mus musculus GN=Spg20 PE=2 SV=1                                                  | 73 kDa  | 1 | 6.833901  | 0.56666667 | 0.66666667 | 0.85        | 1.176470588 |
| Slc8a1 protein OS=Mus musculus GN=Slc8a1 PE=2 SV=1                                          | 107 kDa | 1 | 13.338606 | 1.1        | 1          | 1.1         | 0.909090909 |
| Glutathione peroxidase 3 OS=Mus musculus GN=Gpx3 PE=2 SV=2                                  | 25 kDa  | 1 | 14.786617 | 0.86666667 | 1.03333333 | 0.838709677 | 1.192307692 |
| Microtubule-associated protein 6 OS=Mus musculus GN=Map6 PE=1 SV= MAP6_MOUSE                | 96 kDa  | 1 | 0         | 0.9        | 0.9        | 1           | 1           |
| Sorting nexin 3 OS=Mus musculus GN=Snx3 PE=2 SV=1                                           | 19 kDa  | 1 | 20.551792 | 0.9        | 0.93333333 | 0.964285714 | 1.037037037 |
| 26S protease regulatory subunit 8 OS=Mus musculus GN=Psmc5 PE=1 SV= PRS8_MOUSE              | 46 kDa  | 1 | 12.993085 | 1          | 1.06666667 | 0.9375      | 1.066666667 |
| Cluster of Cysteine desulfurase, mitochondrial OS=Mus musculus GN=Nf NFS1_MOUSE             | 50 kDa  | 1 | 6.491713  | 1.06666667 | 1.06666667 | 1           | 1           |
| 3-hydroxyisobutyrate dehydrogenase, mitochondrial OS=Mus musculus 3HIDH_MOUSE               | 35 kDa  | 1 | 21.619181 | 1.1        | 1.16666667 | 0.942857143 | 1.060606061 |
| Growth factor receptor-bound protein 2 OS=Mus musculus GN=Grb2 PE=B1AT92_MOUSE (+1)         | 24 kDa  | 1 | 20.247634 | 0.9        | 0.93333333 | 0.964285714 | 1.037037037 |
| Complement factor I OS=Mus musculus GN=Cfi PE=1 SV=3                                        | 67 kDa  | 1 | 13.86267  | 1.03333333 | 1          | 1.033333333 | 0.967741935 |
| Cytoskeleton-associated protein 4 OS=Mus musculus GN=Ckap4 PE=2 SV= CKAP4_MOUSE             | 64 kDa  | 1 | 20.963126 | 0.86666667 | 0.93333333 | 0.928571429 | 1.076923077 |
| Desmoglein-2 OS=Mus musculus GN=Dsg2 PE=1 SV=3                                              | 122 kDa | 1 | 12.590171 | 1.06666667 | 1.06666667 | 1           | 1           |
| Epoxide hydrolase 1 OS=Mus musculus GN=Ephx1 PE=2 SV=1                                      | 51 kDa  | 1 | 21.358167 | 0.93333333 | 0.86666667 | 1.076923077 | 0.928571429 |
| Eukaryotic translation initiation factor 3 subunit C OS=Mus musculus GN EIF3C_MOUSE         | 106 kDa | 1 | 6.7104675 | 1          | 0.9        | 1.111111111 | 0.9         |
| Protein ETHE1, mitochondrial OS=Mus musculus GN=Ethe1 PE=1 SV=2                             | 28 kDa  | 1 | 22.189054 | 1          | 0.93333333 | 1.071428571 | 0.933333333 |
| Eukaryotic translation initiation factor 2 subunit 1 OS=Mus musculus GN IF2A_MOUSE          | 36 kDa  | 1 | 19.372503 | 0.9        | 0.9        | 1           | 1           |



|                                                                                          |                   |         |            |            |            |             |             |
|------------------------------------------------------------------------------------------|-------------------|---------|------------|------------|------------|-------------|-------------|
| Platelet-activating factor acetylhydrolase IB subunit alpha OS=Mus musc LIS1_MOUSE       | 47 kDa            | 1       | 18.949524  | 1          | 0.96666667 | 1.034482759 | 0.96666667  |
| Palladin OS=Mus musculus GN=Palld PE=1 SV=2                                              | PALLD_MOUSE (+1)  | 152 kDa | 6.361226   | 0.9        | 0.83333333 | 1.08        | 0.92592592  |
| Prostaglandin E synthase 2 OS=Mus musculus GN=Ptges2 PE=1 SV=3                           | PGES2_MOUSE       | 43 kDa  | 19.298534  | 1.03333333 | 1.03333333 | 1           | 1           |
| Cluster of 26S proteasome non-ATPase regulatory subunit 13 OS=Mus m PSD13_MOUSE          |                   | 43 kDa  | 19.34438   | 0.96666667 | 1          | 0.96666667  | 1.034482759 |
| Target of Myb protein 1 OS=Mus musculus GN=Tom1 PE=2 SV=1                                | Q3UDC3_MOUSE      | 57 kDa  | 20.43223   | 0.76666667 | 0.86666667 | 0.884615385 | 1.130434783 |
| 60S ribosomal protein L36a OS=Mus musculus GN=Rpl36a PE=2 SV=2                           | RL36A_MOUSE       | 12 kDa  | 20.600867  | 0.9        | 1.1        | 0.818181818 | 1.22222222  |
| Small glutamine-rich tetratricopeptide repeat-containing protein alpha CSGTA_MOUSE (+1)  |                   | 34 kDa  | 14.623615  | 0.8        | 0.76666667 | 1.043478261 | 0.95833333  |
| Serine/arginine-rich splicing factor 3 OS=Mus musculus GN=Srsf3 PE=1 S' SRSF3_MOUSE      |                   | 19 kDa  | 13.05389   | 0.93333333 | 0.93333333 | 1           | 1           |
| Carbonyl reductase family member 4 OS=Mus musculus GN=Cbr4 PE=2 SCBR4_MOUSE              |                   | 25 kDa  | 6.1511613  | 1          | 1.1        | 0.909090909 | 1.1         |
| Epimerase family protein SDR39U1 OS=Mus musculus GN=Sdr39u1 PE=1 D39U1_MOUSE (+1)        |                   | 33 kDa  | 20.439826  | 0.93333333 | 1.03333333 | 0.903225806 | 1.107142857 |
| Cluster of 60S ribosomal protein L35 OS=Mus musculus GN=Rpl35 PE=2 ; RL35_MOUSE          |                   | 15 kDa  | 18.864031  | 0.9        | 1.13333333 | 0.794117647 | 1.259259259 |
| Cluster of Heterogeneous nuclear ribonucleoprotein D0 OS=Mus muscul HNRPD_MOUSE [4]      |                   | 38 kDa  | 652.7471   | 0.85       | 1.2        | 0.708333333 | 1.411764706 |
| Cluster of SH3 domain-binding glutamic acid-rich protein OS=Mus muscu SH3BG_MOUSE        |                   | 23 kDa  | 13.148588  | 1.03333333 | 1.03333333 | 1           | 1           |
| Tyrosine--tRNA ligase, cytoplasmic OS=Mus musculus GN=Yars PE=4 SV= A2A757_MOUSE (+1)    |                   | 63 kDa  | 12.950303  | 0.73333333 | 0.83333333 | 0.88        | 1.136363636 |
| Annexin A3 OS=Mus musculus GN=Anxa3 PE=1 SV=4                                            | ANXA3_MOUSE       | 36 kDa  | 22.18531   | 1          | 1.06666667 | 0.9375      | 1.06666667  |
| Protein Gm20547 OS=Mus musculus GN=Gm20547 PE=2 SV=1                                     | B8JJN0_MOUSE (+1) | 142 kDa | 13.875271  | 0.9        | 0.93333333 | 0.964285714 | 1.037037037 |
| Corticosteroid-binding globulin OS=Mus musculus GN=Serpina6 PE=1 SV CBG_MOUSE            |                   | 45 kDa  | 22.933714  | 0.83333333 | 0.7        | 1.19047619  | 0.84        |
| Chloride intracellular channel protein 4 OS=Mus musculus GN=Clic4 PE=: CLIC4_MOUSE       |                   | 29 kDa  | 21.89597   | 0.86666667 | 1.03333333 | 0.838709677 | 1.192307692 |
| Glycogen [starch] synthase, muscle OS=Mus musculus GN=Gys1 PE=2 SV D3Z0Q6_MOUSE (+1)     |                   | 77 kDa  | 22.380893  | 1.06666667 | 1.03333333 | 1.032258065 | 0.96875     |
| Protein Coq10a OS=Mus musculus GN=Coq10a PE=2 SV=1                                       | E9Q3H6_MOUSE      | 29 kDa  | 12.410659  | 1.13333333 | 1.16666667 | 0.971428571 | 1.029411765 |
| Elongation factor Ts, mitochondrial OS=Mus musculus GN=Tsfm PE=2 SV EFTS_MOUSE           |                   | 35 kDa  | 21.897374  | 1.03333333 | 1.13333333 | 0.911764706 | 1.096774194 |
| RNA-binding protein FUS (Fragment) OS=Mus musculus GN=Fus PE=4 SV G3UXT7_MOUSE           |                   | 14 kDa  | 21.779045  | 0.86666667 | 0.9        | 0.962962963 | 1.038461538 |
| Valine--tRNA ligase (Fragment) OS=Mus musculus GN=Vars PE=2 SV=1                         | G3UY93_MOUSE      | 141 kDa | 18.587115  | 0.9        | 1          | 0.9         | 1.111111111 |
| Inter-alpha trypsin inhibitor, heavy chain 2 OS=Mus musculus GN=Itih2 PG3X977_MOUSE (+1) |                   | 106 kDa | 19.237103  | 0.93333333 | 0.96666667 | 0.965517241 | 1.035714286 |
| Matrin-3 OS=Mus musculus GN=Matr3 PE=1 SV=1                                              | MATR3_MOUSE       | 95 kDa  | 12.629765  | 0.9        | 1          | 0.9         | 1.111111111 |
| Ribosylidihydroxynicotinamide dehydrogenase [quinone] OS=Mus musculu: NQO2_MOUSE         |                   | 26 kDa  | 20.096532  | 1.16666667 | 1.2        | 0.972222222 | 1.028571429 |
| Prefoldin subunit 2 OS=Mus musculus GN=Pfdn2 PE=2 SV=2                                   | PF2_MOUSE         | 17 kDa  | 13.970052  | 1          | 1          | 1           | 1           |
| Proteasome subunit beta type-6 OS=Mus musculus GN=Psb6 PE=1 SV= PSB6_MOUSE               |                   | 25 kDa  | 25.282553  | 0.96666667 | 0.93333333 | 1.035714286 | 0.965517241 |
| Multifunctional protein ADE2 OS=Mus musculus GN=Paics PE=1 SV=4                          | PUR6_MOUSE        | 47 kDa  | 18.888196  | 0.93333333 | 1          | 0.93333333  | 1.071428571 |
| 40S ribosomal protein S21 OS=Mus musculus GN=Rps21 PE=2 SV=1                             | RS21_MOUSE        | 9 kDa   | 13.698325  | 0.93333333 | 1          | 0.93333333  | 1.071428571 |
| 40S ribosomal protein SA OS=Mus musculus GN=Rpsa PE=1 SV=4                               | RSSA_MOUSE        | 33 kDa  | 23.045151  | 1.06666667 | 1.13333333 | 0.941176471 | 1.0625      |
| NAD-dependent protein deacetylase sirtuin-5, mitochondrial OS=Mus mus SIR5_MOUSE         |                   | 34 kDa  | 20.148633  | 0.96666667 | 1          | 0.96666667  | 1.034482759 |
| T-complex protein 1 subunit gamma OS=Mus musculus GN=Cct3 PE=1 SV TCGP_MOUSE             |                   | 61 kDa  | 22.54952   | 0.93333333 | 1.06666667 | 0.875       | 1.142857143 |
| Hematological and neurological expressed 1 protein OS=Mus musculus CHN1_MOUSE            |                   | 16 kDa  | 15.79018   | 0.86666667 | 0.7        | 1.238095238 | 0.807692308 |
| 28S ribosomal protein S5, mitochondrial OS=Mus musculus GN=Mrrps5 P RT05_MOUSE           |                   | 48 kDa  | 29.080287  | 1.06666667 | 1.1        | 0.96969697  | 1.03125     |
| Adrenodoxin, mitochondrial OS=Mus musculus GN=Fdx1 PE=2 SV=1                             | ADX_MOUSE         | 20 kDa  | 19.335504  | 1.03333333 | 0.86666667 | 1.192307692 | 0.838709677 |
| Protein 1300017J02Rik OS=Mus musculus GN=1300017J02Rik PE=2 SV=1 D3Y36_MOUSE (+1)        |                   | 69 kDa  | 8.220224   | 1          | 1          | 1           | 1           |
| Cluster of Dynein light chain 2, cytoplasmic OS=Mus musculus GN=Dynll2 DYL2_MOUSE [2]    |                   | 10 kDa  | 165.69188  | 1.05       | 1.3        | 0.807692308 | 1.238095238 |
| Cluster of Mitochondrial import inner membrane translocase subunit TinTIM8A_MOUSE        |                   | 11 kDa  | 14.351054  | 0.96666667 | 0.73333333 | 1.318181818 | 0.75862069  |
| Cytoplasmic dynein 1 intermediate chain 2 OS=Mus musculus GN=Dync1A2BFF5_MOUSE (+4)      |                   | 71 kDa  | 20.015031  | 0.96666667 | 0.9        | 1.074074074 | 0.931034483 |
| Flavin reductase (NADPH) OS=Mus musculus GN=Blvrb PE=2 SV=3                              | BLVRB_MOUSE       | 22 kDa  | 12.3405635 | 1          | 1          | 1           | 1           |
| Adenylyl cyclase-associated protein 1 OS=Mus musculus GN=Cap1 PE=1 :CAP1_MOUSE           |                   | 52 kDa  | 14.57512   | 1          | 1.16666667 | 0.857142857 | 1.16666667  |
| Enoyl-CoA hydratase domain-containing protein 2, mitochondrial (Fragm F6Z5N5_MOUSE (+1)  |                   | 13 kDa  | 13.093527  | 1.16666667 | 1.3        | 0.897435897 | 1.114285714 |
| High mobility group protein B2 OS=Mus musculus GN=Hmgb2 PE=1 SV=3 HMGB2_MOUSE            |                   | 24 kDa  | 12.952177  | 1          | 1.06666667 | 0.9375      | 1.06666667  |
| Heat shock protein 105 kDa OS=Mus musculus GN=Hsph1 PE=1 SV=2                            | HS105_MOUSE (+1)  | 96 kDa  | 13.001297  | 0.63333333 | 0.76666667 | 0.826086957 | 1.210526316 |
| Importin subunit beta-1 OS=Mus musculus GN=Kpnb1 PE=1 SV=2                               | IMB1_MOUSE        | 97 kDa  | 12.750782  | 0.9        | 1          | 0.9         | 1.111111111 |
| Cob(II)rinic acid a,c-diamide adenosyltransferase, mitochondrial OS=Mus MMAB_MOUSE       |                   | 26 kDa  | 13.419797  | 1          | 0.86666667 | 1.153846154 | 0.86666667  |
| Non-POU domain-containing octamer-binding protein OS=Mus musculus: NONO_MOUSE            |                   | 55 kDa  | 6.176474   | 1.05       | 1.05       | 1           | 1           |
| Nucleosome assembly protein 1-like 4 OS=Mus musculus GN=Nap1l4 PE=NP1L4_MOUSE            |                   | 43 kDa  | 21.146168  | 0.93333333 | 1.03333333 | 0.903225806 | 1.107142857 |
| Nuclear migration protein nudC OS=Mus musculus GN=Nudc PE=1 SV=1                         | NUDC_MOUSE        | 38 kDa  | 12.327932  | 0.83333333 | 1          | 0.83333333  | 1.2         |
| Obg-like ATPase 1 OS=Mus musculus GN=Ola1 PE=1 SV=1                                      | OLA1_MOUSE        | 45 kDa  | 12.784268  | 1.03333333 | 0.96666667 | 1.068965517 | 0.935483871 |
| Heterogeneous nuclear ribonucleoprotein H OS=Mus musculus GN=Hnrr Q8C2Q7_MOUSE           |                   | 51 kDa  | 20.153762  | 0.9        | 0.96666667 | 0.931034483 | 1.074074074 |
| 40S ribosomal protein S20 OS=Mus musculus GN=Rps20 PE=1 SV=1                             | RS20_MOUSE        | 13 kDa  | 19.110315  | 0.96666667 | 0.96666667 | 1           | 1           |

|                                                                                               |                   |         |   |            |             |            |             |             |
|-----------------------------------------------------------------------------------------------|-------------------|---------|---|------------|-------------|------------|-------------|-------------|
| Actin-related protein 2 OS=Mus musculus GN=Actr2 PE=1 SV=1                                    | ARP2_MOUSE        | 45 kDa  | 1 | 13.074563  | 0.9         | 1          | 0.9         | 1.111111111 |
| LIM and senescent cell antigen-like-containing domain protein 1 OS=Mu: E9QP62_MOUSE (+1)      |                   | 44 kDa  | 1 | 20.668668  | 1.1         | 1.13333333 | 0.970588235 | 1.03030303  |
| Cluster of ATP-dependent RNA helicase DDX3X OS=Mus musculus GN=D:DDX3X_MOUSE                  |                   | 73 kDa  | 1 | 20.662232  | 0.966666667 | 1.06666667 | 0.90625     | 1.103448276 |
| Cluster of Mitochondrial calcium uniporter regulator 1 OS=Mus musculus: MCUR1_MOUSE           |                   | 38 kDa  | 1 | 6.2511116  | 0.9         | 0.93333333 | 0.964285714 | 1.037037037 |
| Cluster of Ras-related protein Rap-1b OS=Mus musculus GN=Rap1b PE=2 RAP1B_MOUSE [2]           |                   | 21 kDa  | 1 | 8.14968    | 0.85        | 0.95       | 0.894736842 | 1.117647059 |
| Cluster of Serine/arginine-rich-splicing factor 4 OS=Mus musculus GN=Sr A2A837_MOUSE          |                   | 56 kDa  | 1 | 12.12454   | 0.8         | 0.85       | 0.941176471 | 1.0625      |
| ATP-binding cassette sub-family B member 7, mitochondrial OS=Mus mu ABCB7_MOUSE               |                   | 83 kDa  | 1 | 17.686784  | 1.05        | 0.85       | 1.235294118 | 0.80952381  |
| CDGSH iron sulfur domain 3 OS=Mus musculus GN=Cisd3 PE=2 SV=1                                 | B2RWE3_MOUSE (+1) | 15 kDa  | 1 | 19.201045  | 0.966666667 | 1.03333333 | 0.935483871 | 1.068965517 |
| Calpain-1 catalytic subunit OS=Mus musculus GN=Capn1 PE=2 SV=1                                | CAN1_MOUSE        | 82 kDa  | 1 | 20.385556  | 0.966666667 | 1          | 0.966666667 | 1.034482759 |
| Coatomer subunit delta OS=Mus musculus GN=Arcn1 PE=2 SV=2                                     | COPD_MOUSE        | 57 kDa  | 1 | 15.031162  | 0.75        | 0.75       | 1           | 1           |
| Endothelial differentiation-related factor 1 OS=Mus musculus GN=Edf1 P EDF1_MOUSE             |                   | 16 kDa  | 1 | 6.507688   | 0.933333333 | 0.86666667 | 1.076923077 | 0.928571429 |
| Protein-cysteine N-palmitoyltransferase HHAT-like protein OS=Mus musci HHATL_MOUSE            |                   | 56 kDa  | 1 | 26.862833  | 1.233333333 | 1.23333333 | 1           | 1           |
| Ig gamma-3 chain C region OS=Mus musculus PE=1 SV=2                                           | IGHG3_MOUSE       | 44 kDa  | 1 | 21.714237  | 1.1         | 1.16666667 | 0.942857143 | 1.060606061 |
| LYR motif-containing protein 4 OS=Mus musculus GN=Lym4 PE=2 SV=1                              | LYRM4_MOUSE       | 11 kDa  | 1 | 19.110554  | 1.066666667 | 1.06666667 | 1           | 1           |
| NFU1 iron-sulfur cluster scaffold homolog, mitochondrial OS=Mus musci NFU1_MOUSE              |                   | 29 kDa  | 1 | 19.404855  | 0.966666667 | 0.83333333 | 1.16        | 0.862068966 |
| 1-acyl-sn-glycerol-3-phosphate acyltransferase gamma OS=Mus musculus PLCC_MOUSE               |                   | 43 kDa  | 1 | 20.290712  | 1.1         | 1.13333333 | 0.970588235 | 1.03030303  |
| Proteasome subunit alpha type-3 OS=Mus musculus GN=Psm3 PE=1 SV PSA3_MOUSE                    |                   | 28 kDa  | 1 | 12.59461   | 0.933333333 | 0.93333333 | 1           | 1           |
| 28S ribosomal protein S31, mitochondrial OS=Mus musculus GN=Mrps31RT31_MOUSE                  |                   | 44 kDa  | 1 | 13.308081  | 1.066666667 | 1.06666667 | 1           | 1           |
| tRNA-splicing ligase RtcB homolog OS=Mus musculus GN=D10Wsu52e PIRTCB_MOUSE                   |                   | 55 kDa  | 1 | 15.091649  | 0.966666667 | 0.96666667 | 1           | 1           |
| Selenoprotein P OS=Mus musculus GN=Sepp1 PE=2 SV=3                                            | SEPP1_MOUSE       | 43 kDa  | 1 | 33.16094   | 1.3         | 0.75       | 1.733333333 | 0.576923077 |
| PDZ and LIM domain protein 1 OS=Mus musculus GN=Pdlim1 PE=2 SV=4                              | PDL1_MOUSE        | 36 kDa  | 1 | 12.832835  | 0.833333333 | 0.76666667 | 1.086956522 | 0.92        |
| Transmembrane protein 65 OS=Mus musculus GN=Tmem65 PE=2 SV=1                                  | TMM65_MOUSE       | 25 kDa  | 1 | 20.73422   | 1.066666667 | 1.13333333 | 0.941176471 | 1.0625      |
| Protein S100-A13 OS=Mus musculus GN=S100a13 PE=1 SV=1                                         | S10AD_MOUSE       | 11 kDa  | 1 | 12.679668  | 0.9         | 0.86666667 | 1.038461538 | 0.962962963 |
| Cluster of Cytochrome b5 OS=Mus musculus GN=Cyb5a PE=1 SV=2 (CYB5E:CYB5_MOUSE [2])            |                   | 15 kDa  | 1 | 21.050896  | 1.033333333 | 1.03333333 | 1           | 1           |
| Ig gamma-2A chain C region secreted form OS=Mus musculus PE=1 SV=1 GCAB_MOUSE                 |                   | 37 kDa  | 1 | 15.098368  | 1.066666667 | 0.83333333 | 1.28        | 0.78125     |
| Arginine-tRNA ligase, cytoplasmic OS=Mus musculus GN=Rars PE=2 SV= SYRC_MOUSE                 |                   | 76 kDa  | 1 | 15.883525  | 0.95        | 0.15       | 6.333333333 | 0.157894737 |
| Isoform 2 of Hepatoma-derived growth factor-related protein 3 OS=Mus sp Q9JMG7-2 HDGR3_MOUSE  |                   | ?       | 1 | 6.1799414  | 0.966666667 | 0.96666667 | 1           | 1           |
| Cluster of Ribose-phosphate pyrophosphokinase OS=Mus musculus GN=G3UXL2_MOUSE [2]             |                   | 35 kDa  | 1 | 19.531101  | 0.766666667 | 0.9        | 0.851851852 | 1.173913043 |
| Cluster of Charged multivesicular body protein 4b OS=Mus musculus GN CHM4B_MOUSE              |                   | 25 kDa  | 1 | 13.183835  | 1.1         | 1          | 1.1         | 0.909090909 |
| Cluster of Oxysterol-binding protein 1 OS=Mus musculus GN=Osbp PE=1 OSBP1_MOUSE               |                   | 89 kDa  | 1 | 13.223459  | 0.95        | 1.1        | 0.863636364 | 1.157894737 |
| Cytosolic 5'-nucleotidase 3 OS=Mus musculus GN=Nt5c3 PE=1 SV=4                                | 5NT3_MOUSE        | 37 kDa  | 1 | 20.7719    | 0.866666667 | 0.93333333 | 0.928571429 | 1.076923077 |
| Actin-related protein 3 OS=Mus musculus GN=Actr3 PE=1 SV=3                                    | ARP3_MOUSE        | 47 kDa  | 1 | 21.758854  | 0.8         | 0.83333333 | 0.96        | 1.041666667 |
| Carbonic anhydrase 1 OS=Mus musculus GN=Ca1 PE=2 SV=4                                         | CAH1_MOUSE        | 28 kDa  | 1 | 13.645886  | 1.35        | 1.15       | 1.173913043 | 0.851851852 |
| Cell division control protein 42 homolog OS=Mus musculus GN=Cdc42 P CDC42_MOUSE               |                   | 21 kDa  | 1 | 20.504995  | 1           | 1.03333333 | 0.967741935 | 1.033333333 |
| Coiled-coil-helix-coiled-coil-helix domain-containing protein 6, mitochondon CHCH6_MOUSE (+1) |                   | 30 kDa  | 1 | 19.882113  | 0.866666667 | 0.76666667 | 1.130434783 | 0.884615385 |
| MCG148436 OS=Mus musculus GN=1700014D04Rik PE=4 SV=1                                          | J3QMS2_MOUSE      | 109 kDa | 1 | 6.740225   | 0.7         | 0.6        | 1.166666667 | 0.857142857 |
| Mitochondrial intermediate peptidase OS=Mus musculus GN=Mipep PE= MIPEP_MOUSE                 |                   | 81 kDa  | 1 | 7.379151   | 1.1         | 1.15       | 0.956521739 | 1.045454545 |
| Methionine-R-sulfoxide reductase B3, mitochondrial OS=Mus musculus (MSRB3_MOUSE               |                   | 27 kDa  | 1 | 13.802345  | 1           | 1          | 1           | 1           |
| Omega-amidase NIT2 OS=Mus musculus GN=Nit2 PE=1 SV=1                                          | NIT2_MOUSE        | 31 kDa  | 1 | 15.235044  | 1.2         | 1.03333333 | 1.161290323 | 0.861111111 |
| 26S proteasome non-ATPase regulatory subunit 6 OS=Mus musculus GN:PSMD6_MOUSE                 |                   | 46 kDa  | 1 | 28.66693   | 1.166666667 | 1.13333333 | 1.029411765 | 0.971428571 |
| Tyrosine-protein phosphatase non-receptor type 11 OS=Mus musculus CPTN11_MOUSE (+1)           |                   | 68 kDa  | 1 | 15.914597  | 1.166666667 | 1.06666667 | 1.09375     | 0.914285714 |
| Ribosome maturation protein SBDS OS=Mus musculus GN=5bds PE=1 SV SBDS_MOUSE                   |                   | 29 kDa  | 1 | 13.937628  | 0.933333333 | 1.03333333 | 0.903225806 | 1.107142857 |
| Ubiquitin carboxyl-terminal hydrolase isozyme L3 OS=Mus musculus GN: UCHL3_MOUSE              |                   | 26 kDa  | 1 | 35.251498  | 0.933333333 | 0.93333333 | 1           | 1           |
| Isoform 2 of Protein CDV3 OS=Mus musculus GN=Cdv3 sp Q4VAA2-2 CDV3_MOUSE                      |                   | ?       | 1 | 22.427146  | 0.833333333 | 0.7        | 1.19047619  | 0.84        |
| Acyl-CoA synthetase family member 2, mitochondrial OS=Mus musculus ACSF2_MOUSE                |                   | 68 kDa  | 1 | 6.544755   | 0.933333333 | 0.83333333 | 1.12        | 0.892857143 |
| Echinoderm microtubule-associated protein-like 1 OS=Mus musculus GNEMAL1_MOUSE                |                   | 90 kDa  | 1 | 8.173438   | 0.9         | 1.06666667 | 0.84375     | 1.185185185 |
| von Willebrand factor A domain-containing protein 5A OS=Mus musculus VMA5A_MOUSE              |                   | 87 kDa  | 1 | 12.77978   | 0.9         | 1.03333333 | 0.870967742 | 1.148148148 |
| Heterogeneous nuclear ribonucleoprotein Q OS=Mus musculus GN=Sync G3UZI2_MOUSE                |                   | 59 kDa  | 1 | 10.1466365 | 0.733333333 | 0.93333333 | 0.785714286 | 1.272727273 |
| Neurofilament heavy polypeptide OS=Mus musculus GN=Nefh PE=1 SV=: NFH_MOUSE                   |                   | 117 kDa | 1 | 0          | 1.2         | 1.3        | 0.923076923 | 1.083333333 |
| Cluster of Annexin A1 OS=Mus musculus GN=Anxa1 PE=1 SV=2 (ANXA1_ ANXA1_MOUSE                  |                   | 39 kDa  | 1 | 20.375729  | 1           | 1          | 1           | 1           |
| Cluster of Serine (Or cysteine) peptidase inhibitor, clade A, member 3N, G3X8T9_MOUSE [2]     |                   | 47 kDa  | 1 | 0          | 0.6         | 0.6        | 1           | 1           |
| ATP-dependent RNA helicase DDX1 OS=Mus musculus GN=Ddx1 PE=1 SV DDX1_MOUSE                    |                   | 83 kDa  | 1 | 13.02261   | 0.9         | 0.86666667 | 1.038461538 | 0.962962963 |
| NADH-cytochrome b5 reductase 3 OS=Mus musculus GN=Cyb5r3 PE=2 S'F2Z456_MOUSE (+1)             |                   | 35 kDa  | 1 | 12.503378  | 1.033333333 | 1.03333333 | 1           | 1           |

|                                                                                             |        |   |            |             |             |             |             |
|---------------------------------------------------------------------------------------------|--------|---|------------|-------------|-------------|-------------|-------------|
| Mitochondrial glutamate carrier 1 OS=Mus musculus GN=Slc25a22 PE=1 GHC1_MOUSE               | 35 kDa | 1 | 12.737799  | 1.1         | 1.1         | 1           | 1           |
| Glutaredoxin-related protein 5, mitochondrial OS=Mus musculus GN=Glr GLRX5_MOUSE            | 16 kDa | 1 | 18.214183  | 0.866666667 | 0.833333333 | 1.04        | 0.961538462 |
| Homeodomain-only protein OS=Mus musculus GN=Hopx PE=1 SV=1 HOP_MOUSE                        | 8 kDa  | 1 | 22.338365  | 0.9         | 0.8         | 1.125       | 0.888888889 |
| Probable D-lactate dehydrogenase, mitochondrial OS=Mus musculus GN LDHD_MOUSE               | 52 kDa | 1 | 16.007045  | 0.9         | 1           | 0.9         | 1.111111111 |
| Trans-2-enoyl-CoA reductase, mitochondrial OS=Mus musculus GN=Mec MECR_MOUSE                | 40 kDa | 1 | 22.569466  | 1.033333333 | 1.133333333 | 0.911764706 | 1.096774194 |
| Nucleobindin-1 OS=Mus musculus GN=Nucb1 PE=1 SV=2 NUCB1_MOUSE                               | 53 kDa | 1 | 22.663568  | 0.933333333 | 0.9         | 1.037037037 | 0.964285714 |
| Dolichyl-diphosphooligosaccharide--protein glycosyltransferase 48 kDa s OST48_MOUSE         | 49 kDa | 1 | 6.93763    | 0.966666667 | 0.866666667 | 1.115384615 | 0.896551724 |
| Protein kinase C and casein kinase II substrate protein 3 OS=Mus musculus GN=PACN3_MOUSE    | 49 kDa | 1 | 15.184765  | 1           | 1           | 1           | 1           |
| Proteasome subunit beta type-7 OS=Mus musculus GN=Psb7 PE=1 SV=PSB7_MOUSE                   | 30 kDa | 1 | 14.838177  | 0.966666667 | 1           | 0.966666667 | 1.034482759 |
| Serum albumin OS=Bos taurus GN=ALB PE=1 SV=4 ALBU_BOVIN                                     | 69 kDa | 1 | 23.466004  | 0.866666667 | 1.033333333 | 0.838709677 | 1.192307692 |
| Major vault protein OS=Mus musculus GN=Mvp PE=2 SV=1 E9Q3X0_MOUSE (+1)                      | 97 kDa | 1 | 13.458279  | 0.9         | 0.866666667 | 1.038461538 | 0.962962963 |
| GMP reductase 1 OS=Mus musculus GN=Gmpr PE=2 SV=1 GMPR1_MOUSE                               | 37 kDa | 1 | 13.633686  | 1.033333333 | 1.1         | 0.939393939 | 1.064516129 |
| LDLR chaperone MESD OS=Mus musculus GN=Mesdc2 PE=1 SV=1 MESD_MOUSE                          | 25 kDa | 1 | 12.68479   | 0.9         | 0.933333333 | 0.964285714 | 1.037037037 |
| Delta-sarcoglycan OS=Mus musculus GN=Sgcd PE=1 SV=1 SGCD_MOUSE                              | 32 kDa | 1 | 13.283147  | 1.15        | 1.1         | 1.045454545 | 0.956521739 |
| Translocase of inner mitochondrial membrane domain-containing protein TIDC1_MOUSE           | 32 kDa | 1 | 12.383413  | 1.166666667 | 1.1         | 1.060606061 | 0.942857143 |
| Sorting nexin-12 OS=Mus musculus GN=Snx12 PE=2 SV=1 SNX12_MOUSE                             | 19 kDa | 1 | 13.479751  | 0.95        | 0.9         | 1.055555556 | 0.947368421 |
| Heterogeneous nuclear ribonucleoprotein R OS=Mus musculus GN=Hnrr Q8VHM5_MOUSE              | 71 kDa | 1 | 8.2579695  | 0.9         | 0.9         | 1           | 1           |
| Cluster of Muscblind-like 1 (Drosophila), isoform CRA_a OS=Mus musculus GN=G3X9Q0_MOUSE [6] | 41 kDa | 1 | 0          | 0.7         | 1           | 0.7         | 1.428571429 |
| Cluster of Histone-binding protein RBBP7 OS=Mus musculus GN=Rbbp7 IA2AFI9_MOUSE [3]         | 44 kDa | 1 | 6.847463   | 0.8         | 0.85        | 0.941176471 | 1.0625      |
| Cluster of Histone H2A.Z OS=Mus musculus GN=H2afz PE=1 SV=2 (H2AZ_H2AZ_MOUSE                | 14 kDa | 1 | 13.498217  | 1           | 1.066666667 | 0.9375      | 1.066666667 |
| Cluster of Dihydropyrimidinase-related protein 3 OS=Mus musculus GN=E9PWE8_MOUSE            | 74 kDa | 1 | 7.326679   | 0.9         | 0.9         | 1           | 1           |
| Coiled-coil domain-containing protein 90B, mitochondrial OS=Mus musculus GN=CC90B_MOUSE     | 30 kDa | 1 | 12.644841  | 0.933333333 | 1           | 0.933333333 | 1.071428571 |
| Gap junction alpha-1 protein OS=Mus musculus GN=Gja1 PE=1 SV=2 CXA1_MOUSE                   | 43 kDa | 1 | 20.89954   | 1.133333333 | 1.466666667 | 0.772727273 | 1.294117647 |
| Vacuolar protein sorting-associated protein 29 OS=Mus musculus GN=Vf D3Z645_MOUSE (+1)      | 16 kDa | 1 | 6.3425384  | 1.066666667 | 1.133333333 | 0.941176471 | 1.0625      |
| Glucosidase 2 subunit beta OS=Mus musculus GN=Prkcsh PE=1 SV=1 GLU2B_MOUSE                  | 59 kDa | 1 | 13.613571  | 0.866666667 | 0.8         | 1.083333333 | 0.923076923 |
| Complement component 1 Q subcomponent-binding protein, mitochondria Q8R5L1_MOUSE            | 31 kDa | 1 | 29.55775   | 1.6         | 1.4         | 1.142857143 | 0.875       |
| UV excision repair protein RAD23 homolog B OS=Mus musculus GN=Rad RD23B_MOUSE               | 44 kDa | 1 | 23.626433  | 0.9         | 0.9         | 1           | 1           |
| 40S ribosomal protein S23 OS=Mus musculus GN=Rps23 PE=2 SV=3 RS23_MOUSE                     | 16 kDa | 1 | 19.126426  | 0.966666667 | 1.066666667 | 0.90625     | 1.103448276 |
| Aldehyde dehydrogenase family 8 member A1 OS=Mus musculus GN=Al AL8A1_MOUSE                 | 54 kDa | 1 | 6.6674635  | 1.033333333 | 1.233333333 | 0.837837838 | 1.193548387 |
| Basal cell adhesion molecule OS=Mus musculus GN=Bcam PE=2 SV=1 BCAM_MOUSE                   | 68 kDa | 1 | 12.4283746 | 1.066666667 | 1.133333333 | 0.941176471 | 1.0625      |
| Thioredoxin domain-containing protein 5 OS=Mus musculus GN=Txndc5 E9PXX7_MOUSE              | 39 kDa | 1 | 13.339835  | 1           | 0.9         | 1.111111111 | 0.9         |
| Prostamide/prostaglandin F synthase OS=Mus musculus GN=Fam213b P PGFS_MOUSE                 | 22 kDa | 1 | 13.191435  | 0.7         | 0.833333333 | 0.84        | 1.19047619  |
| UV excision repair protein RAD23 homolog A (Fragment) OS=Mus musculus GN=Q3TN85_MOUSE (+2)  | 35 kDa | 1 | 13.322325  | 1.2         | 1.15        | 1.043478261 | 0.958333333 |
| Protein Taf15 OS=Mus musculus GN=Taf15 PE=2 SV=1 Q8BQ46_MOUSE                               | 59 kDa | 1 | 9.34846    | 1.15        | 0.85        | 1.352941176 | 0.739130435 |
| Beta-casein OS=Bos taurus GN=CSN2 PE=1 SV=2 CASB_BOVIN                                      | 25 kDa | 1 | 29.036477  | 1.066666667 | 0.666666667 | 1.6         | 0.625       |
| Histone H1t OS=Mus musculus GN=Hist1h1t PE=1 SV=4 H1T_MOUSE (+1)                            | 22 kDa | 1 | 0          | 1.1         | 0.9         | 1.222222222 | 0.818181818 |
| 5'-AMP-activated protein kinase catalytic subunit alpha-2 OS=Mus musculus GN=AAPK2_MOUSE    | 62 kDa | 1 | 12.972993  | 1.066666667 | 1.033333333 | 1.032258065 | 0.96875     |
| Heat shock protein beta-2 OS=Mus musculus GN=Hspb2 PE=2 SV=2 HSPB2_MOUSE                    | 20 kDa | 1 | 20.600115  | 0.9         | 0.8         | 1.125       | 0.888888889 |
| Myristoylated alanine-rich C-kinase substrate OS=Mus musculus GN=Ma MARCS_MOUSE             | 30 kDa | 1 | 14.273693  | 1.1         | 1           | 1.1         | 0.909090909 |
| Microtubule-associated protein RP/EB family member 1 OS=Mus musculus GN=MARE1_MOUSE         | 30 kDa | 1 | 12.230023  | 0.933333333 | 0.933333333 | 1           | 1           |
| Proteasome subunit beta type-1 OS=Mus musculus GN=Psb1 PE=1 SV=PSB1_MOUSE                   | 26 kDa | 1 | 19.483042  | 1.033333333 | 1.033333333 | 1           | 1           |
| Solute carrier family 25 member 46 OS=Mus musculus GN=Slc25a46 PE=S2546_MOUSE               | 46 kDa | 1 | 18.866791  | 0.966666667 | 1           | 0.966666667 | 1.034482759 |
| Dnaj homolog subfamily A member 1 OS=Mus musculus GN=Dnaja1 PE=DNAJ1_MOUSE                  | 45 kDa | 1 | 12.2515775 | 0.8         | 0.95        | 0.842105263 | 1.1875      |
| Aspartyl aminopeptidase OS=Mus musculus GN=Dnpep PE=2 SV=2 DNPEP_MOUSE                      | 52 kDa | 1 | 12.876654  | 1           | 1.133333333 | 0.882352941 | 1.133333333 |
| Dual specificity mitogen-activated protein kinase kinase 1 OS=Mus musculus GN=MP2K1_MOUSE   | 43 kDa | 1 | 20.728895  | 0.933333333 | 0.966666667 | 0.965517241 | 1.035714286 |
| Aspartyl/asparaginyl beta-hydroxylase OS=Mus musculus GN=Asph PE=2A2AL85_MOUSE (+1)         | 81 kDa | 1 | 7.269213   | 1           | 1.1         | 0.909090909 | 1.1         |
| Proteasome subunit alpha type-5 OS=Mus musculus GN=Psm5 PE=1 SV=PSA5_MOUSE                  | 26 kDa | 1 | 20.520194  | 0.833333333 | 1           | 0.833333333 | 1.2         |
| Microtubule-associated protein RP/EB family member 3 OS=Mus musculus GN=MARE3_MOUSE         | 32 kDa | 1 | 0          | 0.95        | 1           | 0.95        | 1.052631579 |
| Monoglyceride lipase OS=Mus musculus GN=Mgl1 PE=2 SV=1 D3YYS6_MOUSE (+3)                    | 37 kDa | 1 | 12.48107   | 1.066666667 | 1.066666667 | 1           | 1           |
| Fibroblast growth factor 1 OS=Mus musculus GN=Fgf1 PE=2 SV=1 FGF1_MOUSE                     | 17 kDa | 1 | 44.51803   | 1.033333333 | 0.9         | 1.148148148 | 0.870967742 |
| Glycerophosphocholine phosphodiesterase GPCPD1 OS=Mus musculus GN=GPCP1_MOUSE               | 77 kDa | 1 | 7.084916   | 1           | 1           | 1           | 1           |
| Vesicle-associated membrane protein 3 OS=Mus musculus GN=Vamp3 P VAMP3_MOUSE                | 11 kDa | 1 | 6.1215352  | 1.033333333 | 1.033333333 | 1           | 1           |
| Mitochondrial antiviral-signaling protein OS=Mus musculus GN=Mavs PE=MAVS_MOUSE             | 53 kDa | 1 | 12.037785  | 1           | 1           | 1           | 1           |

|                                                                                      |                           |         |   |           |             |            |             |             |
|--------------------------------------------------------------------------------------|---------------------------|---------|---|-----------|-------------|------------|-------------|-------------|
| Biglycan OS=Mus musculus GN=Bgn PE=2 SV=1                                            | PGS1_MOUSE                | 42 kDa  | 1 | 6.314594  | 1.1         | 0.93333333 | 1.178571429 | 0.848484848 |
| Nitric oxide synthase, inducible OS=Mus musculus GN=Nos2 PE=1 SV=1                   | NOS2_MOUSE                | 131 kDa | 1 | 6.3699104 | 0.9         | 0.8        | 1.125       | 0.888888889 |
| Annexin A4 OS=Mus musculus GN=Anxa4 PE=2 SV=4                                        | ANXA4_MOUSE               | 36 kDa  | 1 | 7.121446  | 1           | 0.9        | 1.111111111 | 0.9         |
| F-actin-capping protein subunit alpha-1 OS=Mus musculus GN=Capza1 P CAZA1_MOUSE (+1) | CAZA1_MOUSE (+1)          | 33 kDa  | 1 | 13.759677 | 1.033333333 | 0.96666667 | 1.068965517 | 0.935483871 |
| Cluster of Mitochondrial-processing peptidase subunit beta OS=Mus mu:MPPB_MOUSE      | MPPB_MOUSE                | 55 kDa  | 1 | 19.629665 | 0.933333333 | 1.1        | 0.848484848 | 1.178571429 |
| Protein Gyk OS=Mus musculus GN=Gyk PE=2 SV=1                                         | B1ASZ3_MOUSE (+1)         | 60 kDa  | 1 | 13.799746 | 0.9         | 0.93333333 | 0.964285714 | 1.037037037 |
| Alpha-endosulfine OS=Mus musculus GN=Ensa PE=1 SV=1                                  | ENSA_MOUSE (+1)           | 13 kDa  | 1 | 16.527696 | 1.1         | 1.05       | 1.047619048 | 0.954545455 |
| Mitochondrial import inner membrane translocase subunit Tim8 B OS=MTIM8B_MOUSE       | MTIM8B_MOUSE              | 9 kDa   | 1 | 12.960956 | 0.8         | 0.95       | 0.842105263 | 1.1875      |
| Uncharacterized protein C19orf43 homolog OS=Mus musculus PE=2 SV= CS043_MOUSE        | CS043_MOUSE               | 18 kDa  | 1 | 14.598294 | 1.166666667 | 1.03333333 | 1.129032258 | 0.885714286 |
| rRNA 2'-O-methyltransferase fibrillar OS=Mus musculus GN=Fbl PE=1 SFBRL_MOUSE        | SFBRL_MOUSE               | 34 kDa  | 1 | 0         | 0.933333333 | 1          | 0.933333333 | 1.071428571 |
| Cluster of Agrin OS=Mus musculus GN=Agrn PE=4 SV=1 (M0QWP1_MOUSE M0QWP1_MOUSE)       | M0QWP1_MOUSE M0QWP1_MOUSE | 217 kDa | 1 | 6.987554  | 0.95        | 0.85       | 1.117647059 | 0.894736842 |
| Limb and neural patterns, isoform CRA_c OS=Mus musculus GN=Lnp PE=A2ASL8_MOUSE (+1)  | A2ASL8_MOUSE (+1)         | 42 kDa  | 1 | 6.77235   | 0.95        | 1.1        | 0.863636364 | 1.157894737 |
| 6-phosphofructokinase, liver type OS=Mus musculus GN=Pfkl PE=1 SV=4 K6PL_MOUSE       | K6PL_MOUSE                | 85 kDa  | 1 | 8.306942  | 0.9         | 1.15       | 0.782608696 | 1.277777778 |
| ATP-dependent (S)-NAD(P)H-hydrate dehydratase OS=Mus musculus GN=J3QMM7_MOUSE (+4)   | J3QMM7_MOUSE (+4)         | 35 kDa  | 1 | 13.150911 | 0.95        | 0.95       | 1           | 1           |
| 1,4-alpha-glucan-branching enzyme OS=Mus musculus GN=Gbe1 PE=4 S'F6ZHD8_MOUSE (+1)   | S'F6ZHD8_MOUSE (+1)       | 80 kDa  | 1 | 6.1466843 | 1.15        | 1.25       | 0.92        | 1.086956522 |
| Protein unc-45 homolog A (Fragment) OS=Mus musculus GN=Unc45a PE D3YZN8_MOUSE        | D3YZN8_MOUSE              | 19 kDa  | 1 | 6.113683  | 1.1         | 1          | 1.1         | 0.909090909 |
| sp K22E_HUMAN                                                                        | sp K22E_HUMAN             | ?       | 1 | 0         | 0.8         | 1.1        | 0.727272727 | 1.375       |
| Uncharacterized protein C1orf170 homolog OS=Mus musculus PE=2 SV= CA170_MOUSE        | CA170_MOUSE               | 88 kDa  | 1 | 7.537425  | 0.85        | 0.7        | 1.214285714 | 0.823529412 |
| F-actin-capping protein subunit alpha-2 OS=Mus musculus GN=Capza2 P CAZA2_MOUSE      | CAZA2_MOUSE               | 33 kDa  | 1 | 0         | 0.9         | 0.93333333 | 0.964285714 | 1.037037037 |
| Crk-like protein OS=Mus musculus GN=Crkl PE=1 SV=2                                   | CRKL_MOUSE                | 34 kDa  | 1 | 7.626892  | 1           | 1.1        | 0.909090909 | 1.1         |
| DNA excision repair protein ERCC-6-like OS=Mus musculus GN=Ercc6l PE ERC6L_MOUSE     | ERC6L_MOUSE               | 139 kDa | 1 | 0         | 1.5         | 1.6        | 0.9375      | 1.066666667 |
| DNA-binding protein A OS=Mus musculus GN=Csda PE=1 SV=2                              | DBPA_MOUSE                | 39 kDa  | 1 | 0         | 0.9         | 0.9        | 1           | 1           |
| MCG11326, isoform CRA_b OS=Mus musculus GN=Hnrnp3 PE=4 SV=1 D3YWT1_MOUSE (+1)        | D3YWT1_MOUSE (+1)         | 35 kDa  | 1 | 7.199221  | 1           | 1          | 1           | 1           |
