# Supplementary material
Source: PubMed Central journal article supplement (PMC4847725)
Supplement: NIHMS744867-supplement-10974_2015_9434_MOESM7_ESM.pdf [file NIHMS744867-supplement-10974_2015_9434_MOESM7_ESM.pdf]

| Protein                                                                                                     | Accession Number           | Molecular Weight | Mann Whitney Test (Bonferroni Corrected) | h WT run 1 | Pool WT run 2 | hool WT run 3 | WT 1 | WT 2 | WT 3 | Δ43 1 | Δ43 2 | Δ43 3 | A57G 1 | A57G 2 | A57G 3 |
|-------------------------------------------------------------------------------------------------------------|----------------------------|------------------|------------------------------------------|------------|---------------|---------------|------|------|------|-------|-------|-------|--------|--------|--------|
| Elongation factor 2 OS=Mus musculus GN=Eef2 PE=1 SV=2                                                       | EF2_MOUSE                  | 95 kDa           | < 0.0001                                 | 27         | 28            | 30            | 28   | 27   | 30   | 30    | 28    | 27    | 30     | 28     | 27     |
| Complement C3 OS=Mus musculus GN=C3 PE=1 SV=3                                                               | CO3_MOUSE                  | 186 kDa          | < 0.0001                                 | 32         | 30            | 35            | 30   | 32   | 35   | 35    | 30    | 32    | 35     | 30     | 32     |
| Aldehyde dehydrogenase, mitochondrial OS=Mus musculus GN=Aldh2 PE=1 SV=1                                    | ALDH2_MOUSE                | 57 kDa           | < 0.0001                                 | 12         | 12            | 12            | 12   | 12   | 12   | 12    | 12    | 12    | 12     | 12     | 12     |
| Heat shock protein HSP 90-beta OS=Mus musculus GN=Hsp90ab1 PE=1 SV=3                                        | HS90B_MOUSE                | 83 kDa           | < 0.0001                                 | 27         | 27            | 26            | 27   | 27   | 26   | 26    | 27    | 27    | 26     | 27     | 27     |
| Leucine-rich PPR motif-containing protein, mitochondrial OS=Mus musculus GN=LrpprlPPRC_MOUSE                |                            | 157 kDa          | < 0.0001                                 | 21         | 25            | 22            | 25   | 21   | 22   | 22    | 25    | 21    | 22     | 25     | 21     |
| NAD(P) transhydrogenase, mitochondrial OS=Mus musculus GN=Nnt PE=1 SV=2                                     | NNTM_MOUSE                 | 114 kDa          | < 0.0001                                 | 50         | 67            | 66            | 67   | 50   | 66   | 66    | 67    | 50    | 66     | 67     | 50     |
| Delta-1-pyrroline-5-carboxylate dehydrogenase, mitochondrial OS=Mus musculus GN=AL4A1_MOUSE                 |                            | 62 kDa           | < 0.0001                                 | 12         | 14            | 19            | 14   | 12   | 19   | 19    | 14    | 12    | 19     | 14     | 12     |
| Stress-induced-phosphoprotein 1 OS=Mus musculus GN=Stip1 PE=1 SV=1                                          | STIP1_MOUSE                | 63 kDa           | < 0.0001                                 | 13         | 20            | 19            | 20   | 13   | 19   | 19    | 20    | 13    | 19     | 20     | 13     |
| Cluster of Troponin T, cardiac muscle OS=Mus musculus GN=Tnnt2 PE=4 SV=1 (K3W4R3W4R6_MOUSE [3])             |                            | 35 kDa           | 0.00018                                  | 43         | 37            | 39            | 37   | 43   | 39   | 39    | 37    | 43    | 39     | 37     | 43     |
| Mitochondrial 2-oxoglutarate/malate carrier protein OS=Mus musculus GN=Slc25a11 M2OM_MOUSE                  |                            | 34 kDa           | 0.0017                                   | 11         | 10            | 13            | 10   | 11   | 13   | 10    | 11    | 13    | 10     | 11     | 13     |
| Alpha-1B-glycoprotein OS=Mus musculus GN=A1bg PE=1 SV=1                                                     | A1BG_MOUSE                 | 57 kDa           | 0.0018                                   | 8          | 17            | 8             | 17   | 8    | 8    | 8     | 17    | 8     | 8      | 17     | 8      |
| Elongation factor 1-gamma OS=Mus musculus GN=Eef1g PE=1 SV=3                                                | EF1G_MOUSE                 | 50 kDa           | 0.0025                                   | 11         | 9             | 8             | 9    | 11   | 8    | 8     | 9     | 11    | 8      | 9      | 11     |
| Cluster of Myosin-6 OS=Mus musculus GN=Mylh6 PE=1 SV=2 (MYH6_MOUSE [10])                                    | MYH6_MOUSE                 | 224 kDa          | 0.0039                                   | 667        | 562           | 569           | 562  | 667  | 569  | 569   | 562   | 667   | 569    | 562    | 667    |
| Succinyl-CoA ligase [GDP-forming] subunit beta, mitochondrial OS=Mus musculus GN=SUCB2_MOUSE                |                            | 47 kDa           | 0.0068                                   | 18         | 19            | 18            | 19   | 18   | 18   | 19    | 18    | 18    | 18     | 19     | 18     |
| Cluster of Inorganic pyrophosphatase 2, mitochondrial OS=Mus musculus GN=Ppa2 PED3Z636_MOUSE [2]            |                            | 38 kDa           | 0.0069                                   | 9          | 13            | 15            | 13   | 9    | 15   | 15    | 13    | 9     | 15     | 13     | 9      |
| Coiled-coil-helix-coiled-coil-helix domain-containing protein 3, mitochondrial OS=Mus CHCH3_MOUSE           |                            | 26 kDa           | 0.0084                                   | 14         | 12            | 15            | 12   | 14   | 15   | 15    | 12    | 14    | 15     | 12     | 14     |
| Cluster of Myosin regulatory light chain 2, ventricular/cardiac muscle isoform OS=MusMLRV_MOUSE             |                            | 19 kDa           | 0.011                                    | 58         | 53            | 52            | 53   | 58   | 52   | 52    | 53    | 58    | 52     | 53     | 58     |
| Clathrin heavy chain 1 OS=Mus musculus GN=Cltc PE=1 SV=3                                                    | CLH1_MOUSE                 | 192 kDa          | 0.017                                    | 21         | 20            | 18            | 20   | 21   | 18   | 18    | 20    | 21    | 18     | 20     | 21     |
| Histidine rich calcium binding protein, isoform CRA_a OS=Mus musculus GN=Hrc PE=4G5E8I6_MOUSE               |                            | 85 kDa           | 0.017                                    | 16         | 61            | 49            | 61   | 16   | 49   | 49    | 61    | 16    | 49     | 61     | 16     |
| Sarcalumenin OS=Mus musculus GN=Srl PE=1 SV=1                                                               | SRCA_MOUSE                 | 99 kDa           | 0.02                                     | 34         | 27            | 33            | 27   | 34   | 33   | 27    | 34    | 33    | 27     | 34     | 33     |
| Cytochrome c oxidase subunit 5B, mitochondrial OS=Mus musculus GN=Cox5b PE=1 SV=1 S COX5B_MOUSE             |                            | 14 kDa           | 0.02                                     | 31         | 40            | 44            | 40   | 31   | 44   | 44    | 40    | 31    | 44     | 40     | 31     |
| Serpin H1 OS=Mus musculus GN=Serpinh1 PE=1 SV=3                                                             | SERPH_MOUSE                | 47 kDa           | 0.021                                    | 9          | 13            | 10            | 13   | 9    | 10   | 10    | 13    | 9     | 10     | 13     | 9      |
| Calcium-binding mitochondrial carrier protein Aralar1 OS=Mus musculus GN=Slc25a12CMC1_MOUSE                 |                            | 75 kDa           | 0.024                                    | 11         | 11            | 13            | 11   | 11   | 13   | 13    | 11    | 11    | 13     | 11     | 11     |
| Short-chain specific acyl-CoA dehydrogenase, mitochondrial OS=Mus musculus GN=AaCAD5_MOUSE                  |                            | 45 kDa           | 0.031                                    | 21         | 28            | 31            | 28   | 21   | 31   | 31    | 28    | 21    | 31     | 28     | 21     |
| Heterogeneous nuclear ribonucleoprotein U OS=Mus musculus GN=Hnrnpu PE=4 SV=2 G3XA10_MOUSE (+1)             |                            | 87 kDa           | 0.038                                    | 7          | 8             | 7             | 8    | 7    | 7    | 7     | 8     | 7     | 7      | 8      | 7      |
| Cluster of long-chain-fatty-acid-CoA ligase 1 OS=Mus musculus GN=Acs1 PE=1 SV=2 ACSL1_MOUSE [4]             |                            | 78 kDa           | 0.039                                    | 41         | 28            | 35            | 28   | 41   | 35   | 35    | 28    | 41    | 35     | 28     | 41     |
| Citrate lyase subunit beta-like protein, mitochondrial OS=Mus musculus GN=Clybl PE=CLYBL_MOUSE              |                            | 38 kDa           | 0.042                                    | 9          | 10            | 11            | 10   | 9    | 11   | 11    | 10    | 9     | 11     | 10     | 9      |
| Cytochrome b-c1 complex subunit 7 OS=Mus musculus GN=Uqcrb PE=3 SV=1                                        | Q9CQB4_MOUSE (+1)          | 14 kDa           | 0.046                                    | 10         | 16            | 14            | 16   | 10   | 14   | 14    | 16    | 10    | 14     | 16     | 10     |
| Isovaleryl-CoA dehydrogenase, mitochondrial OS=Mus musculus GN=Ivd PE=1 SV=1                                | IVD_MOUSE                  | 46 kDa           | 0.048                                    | 23         | 30            | 30            | 30   | 23   | 30   | 30    | 23    | 30    | 30     | 23     | 30     |
| NADH dehydrogenase [ubiquinone] iron-sulfur protein 4, mitochondrial OS=Mus musculus GN=msu9QXP3_MOUSE (+1) |                            | 20 kDa           | 0.048                                    | 11         | 18            | 16            | 18   | 11   | 16   | 16    | 18    | 11    | 16     | 18     | 11     |
| Protein Ogdh OS=Mus musculus GN=Ogdh1 PE=2 SV=1                                                             | E9Q7L0_MOUSE               | 117 kDa          | 0.052                                    | 3          | 11            | 11            | 11   | 3    | 11   | 11    | 3     | 11    | 3      | 11     | 3      |
| Cluster of Creatine kinase S-type, mitochondrial OS=Mus musculus GN=Ckmt2 PE=1 SV=1 SKCRS_MOUSE             |                            | 47 kDa           | 0.055                                    | 45         | 44            | 43            | 44   | 45   | 43   | 43    | 44    | 45    | 43     | 44     | 45     |
| Nidogen-1 OS=Mus musculus GN=Nid1 PE=1 SV=2                                                                 | NID1_MOUSE                 | 137 kDa          | 0.056                                    | 11         | 11            | 10            | 11   | 11   | 10   | 10    | 11    | 11    | 10     | 11     | 11     |
| Cluster of Aspartate aminotransferase, cytoplasmic OS=Mus musculus GN=Got1 PE=1 SV=1 AATC_MOUSE [2]         |                            | 46 kDa           | 0.06                                     | 31         | 30            | 35            | 30   | 31   | 35   | 35    | 30    | 31    | 35     | 30     | 31     |
| Cluster of 6-phosphofruktokinase, muscle type OS=Mus musculus GN=PfkM PE=1 SV=3K6PF_MOUSE                   |                            | 85 kDa           | 0.062                                    | 18         | 26            | 23            | 26   | 18   | 23   | 23    | 26    | 18    | 23     | 26     | 18     |
| Cytoplasmic dynein 1 heavy chain 1 OS=Mus musculus GN=Dync1h1 PE=1 SV=2                                     | DYHC1_MOUSE                | 532 kDa          | 0.067                                    | 18         | 26            | 24            | 26   | 18   | 24   | 24    | 26    | 18    | 24     | 26     | 18     |
| Isocitrate dehydrogenase [NADP], mitochondrial OS=Mus musculus GN=ldh2 PE=1 SV=4DHP_MOUSE                   |                            | 51 kDa           | 0.068                                    | 48         | 49            | 50            | 49   | 48   | 50   | 49    | 48    | 50    | 49     | 48     | 50     |
| Transgelin OS=Mus musculus GN=Tagln PE=1 SV=3                                                               | TAGL_MOUSE                 | 23 kDa           | 0.08                                     | 6          | 11            | 9             | 11   | 6    | 9    | 9     | 11    | 6     | 9      | 11     | 6      |
| Cluster of Keratin, type I cytoskeletal 10 OS=Homo sapiens GN=KRT10 PE=1 SV=6 (K1CK1C10_HUMAN [11])         |                            | 60 kDa           | 0.09                                     | 20         | 13            | 11            | 13   | 20   | 11   | 11    | 13    | 20    | 11     | 13     | 20     |
| Annexin A5 OS=Mus musculus GN=Anxa5 PE=1 SV=1                                                               | ANXA5_MOUSE                | 36 kDa           | 0.11                                     | 14         | 13            | 14            | 13   | 14   | 14   | 14    | 13    | 14    | 14     | 13     | 14     |
| Peptidyl-prolyl cis-trans isomerase F, mitochondrial OS=Mus musculus GN=Ppif PE=1 SV=1 SPPIF_MOUSE          |                            | 22 kDa           | 0.12                                     | 8          | 6             | 8             | 6    | 8    | 8    | 8     | 6     | 8     | 8      | 6      | 8      |
| Fumarate hydratase, mitochondrial OS=Mus musculus GN=Fh PE=1 SV=3                                           | FUMH_MOUSE (+1)            | 54 kDa           | 0.13                                     | 26         | 34            | 37            | 34   | 26   | 37   | 37    | 34    | 26    | 37     | 34     | 26     |
| L-lactate dehydrogenase B chain OS=Mus musculus GN=Ldhb PE=1 SV=2                                           | LDHB_MOUSE                 | 37 kDa           | 0.15                                     | 35         | 34            | 32            | 34   | 35   | 32   | 32    | 34    | 35    | 32     | 34     | 35     |
| 40S ribosomal protein S11 OS=Mus musculus GN=Rps11 PE=2 SV=3                                                | RS11_MOUSE                 | 18 kDa           | 0.15                                     | 4          | 5             | 7             | 5    | 4    | 7    | 7     | 5     | 4     | 7      | 5      | 4      |
| 60S ribosomal protein L7 OS=Mus musculus GN=Rpl7 PE=2 SV=2                                                  | RL7_MOUSE                  | 31 kDa           | 0.17                                     | 7          | 9             | 10            | 9    | 7    | 10   | 10    | 9     | 7     | 10     | 9      | 7      |
| Dehydrogenase/reductase SDR family member 4 OS=Mus musculus GN=Dhrs4 PE=2 SV=2 S DHRSA_MOUSE                |                            | 30 kDa           | 0.18                                     | 7          | 11            | 12            | 11   | 7    | 12   | 12    | 11    | 7     | 12     | 11     | 7      |
| Profilin-1 OS=Mus musculus GN=Pfn1 PE=1 SV=2                                                                | PROF1_MOUSE                | 15 kDa           | 0.18                                     | 7          | 8             | 10            | 8    | 7    | 10   | 10    | 8     | 7     | 10     | 8      | 7      |
| BAG family molecular chaperone regulator 3 OS=Mus musculus GN=Bag3 PE=1 SV=2                                | BAG3_MOUSE                 | 62 kDa           | 0.19                                     | 17         | 28            | 29            | 28   | 17   | 29   | 29    | 28    | 17    | 29     | 28     | 17     |
| Ryanodine receptor 2 OS=Mus musculus GN=Ryr2 PE=1 SV=1                                                      | RYR2_MOUSE                 | 565 kDa          | 0.2                                      | 26         | 28            | 41            | 28   | 26   | 41   | 41    | 28    | 26    | 41     | 28     | 26     |
| Lamin-B1 OS=Mus musculus GN=Lmnb1 PE=1 SV=3                                                                 | LMNB1_MOUSE                | 67 kDa           | 0.22                                     | 10         | 15            | 17            | 15   | 10   | 17   | 17    | 15    | 10    | 17     | 15     | 10     |
| Histone H4 OS=Mus musculus GN=Hist1h4a PE=1 SV=2                                                            | H4_MOUSE                   | 11 kDa           | 0.25                                     | 17         | 14            | 15            | 14   | 17   | 15   | 15    | 14    | 17    | 15     | 14     | 17     |
| NADH dehydrogenase [ubiquinone] 1 alpha subcomplex subunit 9, mitochondrial OS=NDUA9_MOUSE                  |                            | 43 kDa           | 0.29                                     | 19         | 20            | 20            | 20   | 19   | 20   | 20    | 20    | 19    | 20     | 20     | 19     |
| Voltage-dependent anion-selective channel protein 1 OS=Mus musculus GN=Vdac1 PEVdac1_MOUSE                  |                            | 32 kDa           | 0.33                                     | 22         | 19            | 20            | 19   | 22   | 20   | 19    | 22    | 20    | 19     | 22     | 20     |
| SET and MYND domain-containing protein 1 OS=Mus musculus GN=Smyd1 PE=2 SV=1 G5E8R7_MOUSE (+1)               |                            | 53 kDa           | 0.37                                     | 11         | 14            | 12            | 14   | 11   | 12   | 12    | 14    | 11    | 12     | 14     | 11     |
| ATP synthase subunit alpha, mitochondrial OS=Mus musculus GN=Atp5a1 PE=1 SV=1                               | ATPA_MOUSE                 | 60 kDa           | 0.38                                     | 82         | 74            | 73            | 74   | 82   | 73   | 73    | 74    | 82    | 73     | 74     | 82     |
| Cluster of cAMP-dependent protein kinase type I-alpha regulatory subunit OS=Mus m KAPO_MOUSE                |                            | 43 kDa           | 0.53                                     | 10         | 8             | 7             | 8    | 10   | 7    | 7     | 8     | 10    | 7      | 8      | 10     |
| NADP-dependent malic enzyme, mitochondrial OS=Mus musculus GN=Me3 PE=1 SV=2MAON_MOUSE                       |                            | 67 kDa           | 0.55                                     | 5          | 9             | 7             | 9    | 5    | 7    | 7     | 9     | 5     | 7      | 9      | 5      |
| Carnitine O-acetyltransferase OS=Mus musculus GN=Crat PE=1 SV=3                                             | CACP_MOUSE (+1)            | 71 kDa           | 0.62                                     | 23         | 29            | 27            | 29   | 23   | 27   | 27    | 29    | 23    | 27     | 29     | 23     |
| ATP synthase subunit beta, mitochondrial OS=Mus musculus GN=Atp5b PE=1 SV=2                                 | ATPB_MOUSE                 | 56 kDa           | 0.68                                     | 72         | 71            | 66            | 71   | 72   | 66   | 66    | 71    | 72    | 66     | 71     | 72     |
| 60S ribosomal protein L34 OS=Mus musculus GN=Rpl34 PE=3 SV=2                                                | RL34_MOUSE                 | 13 kDa           | 0.71                                     | 5          | 5             | 4             | 5    | 5    | 4    | 4     | 5     | 5     | 4      | 5      | 5      |
| Hsc70-interacting protein OS=Mus musculus GN=St13 PE=2 SV=1                                                 | F10A1_MOUSE                | 42 kDa           | 0.72                                     | 7          | 10            | 9             | 10   | 7    | 9    | 9     | 10    | 7     | 9      | 10     | 7      |
| Protein Ahnak OS=Mus musculus GN=Ahnak PE=2 SV=1                                                            | E9Q616_MOUSE               | 604 kDa          | 0.96                                     | 35         | 49            | 46            | 49   | 35   | 46   | 46    | 49    | 35    | 46     | 49     | 35     |
| Cluster of isoform 2 of Titin OS=Mus musculus GN=Ttn (sp) [A2ASS6-2] TITIN_MOUSE                            | sp [A2ASS6-2] TITIN_MOUSE? |                  | 1                                        | 997        | 1169          | 1237          | 1169 | 997  | 1237 | 1237  | 1169  | 997   | 1237   | 1169   | 997    |
| Cluster of Actin, alpha cardiac muscle 1 OS=Mus musculus GN=Actc1 PE=1 SV=1 (ACTCACTC_MOUSE [5])            |                            | 42 kDa           | 1                                        | 87         | 90            | 88            | 90   | 87   | 88   | 88    | 90    | 87    | 88     | 90     | 87     |

|                                                                                                            |                     |         |    |     |     |     |     |     |     |     |     |     |     |     |     |
|------------------------------------------------------------------------------------------------------------|---------------------|---------|----|-----|-----|-----|-----|-----|-----|-----|-----|-----|-----|-----|-----|
| Cluster of Serum albumin OS=Mus musculus GN=Alb PE=1 SV=3 (ALBU_MOUSE)                                     | ALBU_MOUSE [2]      | 69 kDa  | 1  | 130 | 132 | 123 | 132 | 130 | 123 | 123 | 132 | 130 | 123 | 132 | 130 |
| Cluster of Tropomyosin 1, alpha, isoform CRA_c OS=Mus musculus GN=Tpm1 PE=2 SV Q8BP43_MOUSE [10]           | Q8BP43_MOUSE [10]   | 33 kDa  | 1  | 137 | 118 | 115 | 118 | 137 | 115 | 115 | 118 | 137 | 115 | 118 | 137 |
| Cluster of Beta-globin OS=Mus musculus GN=Hbb-b1 PE=3 SV=1 (ABDUK4_MOUSE)                                  | ABDUK4_MOUSE [4]    | 16 kDa  | 1  | 38  | 43  | 44  | 43  | 38  | 44  | 44  | 43  | 38  | 44  | 43  | 38  |
| Cluster of Myoglobin OS=Mus musculus GN=Mb PE=1 SV=3 (MYG_MOUSE)                                           | MYG_MOUSE           | 17 kDa  | 1  | 42  | 47  | 44  | 47  | 42  | 44  | 44  | 47  | 42  | 44  | 47  | 42  |
| Cluster of Hemoglobin subunit alpha OS=Mus musculus GN=Hba PE=1 SV=2 (HBA_MCHBA_MOUSE [3])                 | HBA_MCHBA_MOUSE [3] | 15 kDa  | 1  | 20  | 26  | 26  | 26  | 20  | 26  | 26  | 26  | 20  | 26  | 26  | 20  |
| Aconitate hydratase, mitochondrial OS=Mus musculus GN=Aco2 PE=1 SV=1                                       | ACON_MOUSE          | 85 kDa  | 1  | 84  | 91  | 92  | 91  | 84  | 92  | 92  | 91  | 84  | 92  | 91  | 84  |
| Myosin-binding protein C, cardiac-type OS=Mus musculus GN=Mybpc3 PE=2 SV=1                                 | E9Q9T8_MOUSE (+1)   | 141 kDa | 1  | 106 | 128 | 118 | 128 | 106 | 118 | 118 | 128 | 106 | 118 | 128 | 106 |
| Cluster of Isoform 2 of Sarcolemmal/endoplasmic reticulum calcium ATPase 2 OS=Mu sp O52143-2 AT2A2_MOUSE ? | O52143-2_MOUSE ?    | 1       | 99 | 103 | 109 | 103 | 99  | 109 | 109 | 103 | 99  | 109 | 103 | 99  | 103 |
| Cluster of Myosin light chain 3 OS=Mus musculus GN=MyI3 PE=1 SV=4 (MYL3_MOUSE MYL3_MOUSE [3])              | MYL3_MOUSE [3]      | 22 kDa  | 1  | 41  | 39  | 36  | 39  | 41  | 36  | 36  | 39  | 41  | 36  | 39  | 41  |
| Cluster of Fatty acid-binding protein, heart OS=Mus musculus GN=Fabp3 PE=1 SV=5 (FABPH_MOUSE [3])          | FABPH_MOUSE [3]     | 15 kDa  | 1  | 37  | 41  | 38  | 41  | 37  | 38  | 38  | 41  | 37  | 38  | 41  | 37  |
| Malate dehydrogenase, mitochondrial OS=Mus musculus GN=Mdh2 PE=1 SV=3                                      | MDHM_MOUSE          | 36 kDa  | 1  | 45  | 59  | 54  | 59  | 45  | 54  | 54  | 59  | 45  | 54  | 59  | 45  |
| Cluster of Alpha-actinin-2 OS=Mus musculus GN=Actn2 PE=1 SV=2 (ACTN2_MOUSE)                                | ACTN2_MOUSE [5]     | 104 kDa | 1  | 83  | 92  | 88  | 92  | 83  | 88  | 88  | 92  | 83  | 88  | 92  | 83  |
| Myomesin-1 OS=Mus musculus GN=Myom1 PE=1 SV=2                                                              | MYOM1_MOUSE         | 185 kDa | 1  | 85  | 85  | 88  | 85  | 85  | 88  | 88  | 85  | 85  | 88  | 85  | 85  |
| Myomesin 2 OS=Mus musculus GN=Myom2 PE=2 SV=1                                                              | Q14BI5_MOUSE        | 165 kDa | 1  | 77  | 87  | 96  | 87  | 77  | 96  | 96  | 87  | 77  | 96  | 87  | 77  |
| Very long-chain specific acyl-CoA dehydrogenase, mitochondrial OS=Mus musculus GN=ACADV_MOUSE              | ACADV_MOUSE         | 71 kDa  | 1  | 66  | 70  | 73  | 70  | 66  | 73  | 73  | 70  | 66  | 73  | 70  | 66  |
| Trifunctional enzyme subunit alpha, mitochondrial OS=Mus musculus GN=Hadha PE=:ECHA_MOUSE                  | ECHA_MOUSE          | 83 kDa  | 1  | 55  | 50  | 44  | 50  | 55  | 44  | 44  | 50  | 55  | 44  | 50  | 55  |
| Cluster of ADP/ATP translocase 1 OS=Mus musculus GN=Slc25a4 PE=1 SV=4 (ADT1_MOUSE ADT1_MOUSE [2])          | ADT1_MOUSE [2]      | 33 kDa  | 1  | 40  | 35  | 40  | 35  | 40  | 40  | 40  | 35  | 40  | 40  | 35  | 40  |
| Cluster of Creatine kinase M-type OS=Mus musculus GN=Ckm PE=1 SV=1 (KCRM_MOUSE KCRM_MOUSE [2])             | KCRM_MOUSE [2]      | 43 kDa  | 1  | 49  | 42  | 34  | 42  | 49  | 34  | 34  | 42  | 49  | 34  | 42  | 49  |
| Long-chain specific acyl-CoA dehydrogenase, mitochondrial OS=Mus musculus GN=Ac ACADL_MOUSE                | ACADL_MOUSE         | 48 kDa  | 1  | 50  | 56  | 58  | 56  | 50  | 58  | 58  | 56  | 50  | 58  | 56  | 50  |
| Cluster of Glycogen phosphorylase, muscle form OS=Mus musculus GN=Pygm PE=1 SV PYGM_MOUSE [3]              | PYGM_MOUSE [3]      | 97 kDa  | 1  | 67  | 71  | 73  | 71  | 67  | 73  | 73  | 71  | 67  | 73  | 71  | 67  |
| Cluster of Glyceraldehyde-3-phosphate dehydrogenase OS=Mus musculus GN=Gm50f D3Z029_MOUSE [4]              | D3Z029_MOUSE [4]    | 36 kDa  | 1  | 27  | 33  | 34  | 33  | 27  | 34  | 34  | 33  | 27  | 34  | 33  | 27  |
| Malate dehydrogenase, cytoplasmic OS=Mus musculus GN=Mdh1 PE=1 SV=3                                        | MDHC_MOUSE          | 37 kDa  | 1  | 33  | 43  | 41  | 43  | 33  | 41  | 41  | 43  | 33  | 41  | 43  | 33  |
| Desmin OS=Mus musculus GN=Des PE=1 SV=3                                                                    | DESM_MOUSE          | 53 kDa  | 1  | 53  | 53  | 50  | 53  | 53  | 50  | 50  | 53  | 53  | 50  | 53  | 53  |
| NADH-ubiquinone oxidoreductase 75 kDa subunit, mitochondrial OS=Mus musculus GN=NDU5_MOUSE                 | NDU5_MOUSE          | 80 kDa  | 1  | 50  | 57  | 63  | 57  | 50  | 63  | 63  | 57  | 50  | 63  | 57  | 50  |
| Desmoplakin OS=Mus musculus GN=Dsp PE=2 SV=1                                                               | DESP_MOUSE          | 333 kDa | 1  | 66  | 78  | 70  | 78  | 66  | 70  | 70  | 78  | 66  | 70  | 78  | 66  |
| Cluster of Citrate synthase, mitochondrial OS=Mus musculus GN=Cs PE=1 SV=1 (CISY_MOUSE CISY_MOUSE [2])     | CISY_MOUSE [2]      | 52 kDa  | 1  | 29  | 38  | 37  | 38  | 29  | 37  | 37  | 38  | 29  | 37  | 38  | 29  |
| 3-oxoacyl-CoA thiolase, mitochondrial OS=Mus musculus GN=Acaa2 PE=1 SV=3                                   | THIM_MOUSE          | 42 kDa  | 1  | 52  | 38  | 44  | 38  | 52  | 44  | 44  | 38  | 52  | 44  | 38  | 52  |
| Cluster of Plectin OS=Mus musculus GN=Plec PE=1 SV=2 (PLEC_MOUSE)                                          | PLEC_MOUSE [2]      | 534 kDa | 1  | 73  | 83  | 90  | 83  | 73  | 90  | 90  | 83  | 73  | 90  | 83  | 73  |
| Cluster of Serotransferrin OS=Mus musculus GN=Tf PE=1 SV=1 (TRFE_MOUSE)                                    | TRFE_MOUSE [4]      | 77 kDa  | 1  | 53  | 66  | 65  | 66  | 53  | 65  | 65  | 66  | 53  | 65  | 66  | 53  |
| Electron transfer flavoprotein subunit alpha, mitochondrial OS=Mus musculus GN=Etff ETFA_MOUSE             | ETF_A_MOUSE         | 35 kDa  | 1  | 33  | 30  | 32  | 30  | 33  | 32  | 32  | 30  | 33  | 32  | 30  | 33  |
| Troponin I, cardiac muscle OS=Mus musculus GN=Tnni3 PE=1 SV=2                                              | TNNI3_MOUSE         | 24 kDa  | 1  | 33  | 35  | 35  | 35  | 33  | 35  | 35  | 33  | 35  | 35  | 33  | 33  |
| Cluster of Fructose-bisphosphate aldolase OS=Mus musculus GN=Aldoa PE=2 SV=1 (A1 AGZ144_MOUSE [3])         | AGZ144_MOUSE [3]    | 45 kDa  | 1  | 47  | 44  | 50  | 44  | 47  | 50  | 50  | 44  | 47  | 50  | 44  | 47  |
| Cluster of Heat shock cognate 71 kDa protein OS=Mus musculus GN=Hspa8 PE=1 SV=:HSP7C_MOUSE [5]             | HSP7C_MOUSE [5]     | 71 kDa  | 1  | 40  | 53  | 53  | 53  | 40  | 53  | 53  | 53  | 40  | 53  | 53  | 40  |
| Trifunctional enzyme subunit beta, mitochondrial OS=Mus musculus GN=Hadhb PE=1 ECHB_MOUSE                  | ECHB_MOUSE          | 51 kDa  | 1  | 37  | 39  | 38  | 39  | 37  | 38  | 38  | 39  | 37  | 38  | 39  | 37  |
| Cluster of Spectrin alpha chain, non-erythrocytic 1 OS=Mus musculus GN=Sptan1 PE=:E9Q447_MOUSE [2]         | E9Q447_MOUSE [2]    | 285 kDa | 1  | 76  | 74  | 71  | 74  | 76  | 71  | 71  | 74  | 76  | 71  | 74  | 76  |
| Cluster of Obscurin OS=Mus musculus GN=Obscn PE=2 (OBSCN_MOUSE)                                            | OBSCN_MOUSE [3]     | 966 kDa | 1  | 47  | 81  | 75  | 81  | 47  | 75  | 75  | 81  | 47  | 75  | 81  | 47  |
| Aspartate aminotransferase, mitochondrial OS=Mus musculus GN=Got2 PE=1 SV=1                                | AATM_MOUSE          | 47 kDa  | 1  | 50  | 37  | 43  | 37  | 50  | 43  | 43  | 37  | 50  | 43  | 37  | 50  |
| Stress-70 protein, mitochondrial OS=Mus musculus GN=Hspa9 PE=1 SV=3                                        | GRP75_MOUSE         | 73 kDa  | 1  | 49  | 50  | 51  | 50  | 49  | 51  | 51  | 50  | 49  | 51  | 50  | 49  |
| Cluster of Mitochondrial inner membrane protein OS=Mus musculus GN=Immt PE=2 :E9Q800_MOUSE [3]             | E9Q800_MOUSE [3]    | 76 kDa  | 1  | 52  | 56  | 61  | 56  | 52  | 61  | 61  | 56  | 52  | 61  | 56  | 52  |
| Cluster of Nebulette OS=Mus musculus GN=Neb1 PE=2 SV=1 (B7ZCI2_MOUSE)                                      | B7ZCI2_MOUSE [3]    | 116 kDa | 1  | 47  | 73  | 68  | 73  | 47  | 68  | 68  | 73  | 47  | 68  | 73  | 47  |
| Succinate dehydrogenase [ubiquinone] flavoprotein subunit, mitochondrial OS=Mus r DHSA_MOUSE               | DHSA_MOUSE          | 73 kDa  | 1  | 42  | 50  | 54  | 50  | 42  | 54  | 54  | 50  | 42  | 54  | 50  | 42  |
| Medium-chain specific acyl-CoA dehydrogenase, mitochondrial OS=Mus musculus GN ACADM_MOUSE                 | ACADM_MOUSE         | 46 kDa  | 1  | 30  | 36  | 34  | 36  | 30  | 34  | 34  | 36  | 30  | 34  | 36  | 30  |
| Cytochrome b-c1 complex subunit 2, mitochondrial OS=Mus musculus GN=Uqcrc2 PE: QCR2_MOUSE                  | QCR2_MOUSE          | 48 kDa  | 1  | 35  | 51  | 55  | 51  | 35  | 55  | 55  | 51  | 35  | 55  | 51  | 35  |
| Cluster of 14-3-3 protein gamma OS=Mus musculus GN=Yvhag PE=1 SV=2 (1433G_MI1433G_MOUSE [9])               | 1433G_MOUSE [9]     | 28 kDa  | 1  | 56  | 58  | 63  | 58  | 56  | 63  | 63  | 58  | 56  | 63  | 58  | 56  |
| Cluster of Beta-enolase OS=Mus musculus GN=Eno3 PE=1 SV=3 (ENOB_MOUSE)                                     | ENOB_MOUSE [3]      | 47 kDa  | 1  | 38  | 33  | 28  | 33  | 38  | 28  | 28  | 33  | 38  | 28  | 33  | 38  |
| Cluster of Phosphoglycerate kinase 1 OS=Mus musculus GN=Pgk1 PE=1 SV=4 (PGK1_A_PGK1_MOUSE [2])             | PGK1_MOUSE [2]      | 45 kDa  | 1  | 45  | 35  | 40  | 35  | 45  | 40  | 40  | 35  | 45  | 40  | 35  | 45  |
| Cluster of Vimentin OS=Mus musculus GN=Vim PE=1 SV=3 (VIME_MOUSE)                                          | VIME_MOUSE [19]     | 54 kDa  | 1  | 55  | 64  | 51  | 64  | 55  | 51  | 51  | 64  | 55  | 51  | 64  | 55  |
| Cluster of Isoform M1 of Pyruvate kinase PKM OS=Mus musculus GN=Pkm (sp) P52480-2 KPYM_MOUSE ?             | P52480-2_MOUSE ?    | 1       | 48 | 39  | 38  | 39  | 38  | 48  | 38  | 38  | 39  | 48  | 38  | 39  | 48  |
| Iso citrate dehydrogenase [NAD] subunit alpha, mitochondrial OS=Mus musculus GN=IDH3A_MOUSE                | IDH3A_MOUSE         | 40 kDa  | 1  | 34  | 34  | 36  | 34  | 34  | 36  | 36  | 34  | 34  | 36  | 34  | 34  |
| Electron transfer flavoprotein subunit beta OS=Mus musculus GN=Etff PE=1 SV=3                              | ETFB_MOUSE          | 28 kDa  | 1  | 32  | 28  | 28  | 28  | 32  | 28  | 28  | 28  | 32  | 28  | 28  | 32  |
| Acetyl-CoA acetyltransferase, mitochondrial OS=Mus musculus GN=Acac1 PE=1 SV=1                             | THIL_MOUSE          | 45 kDa  | 1  | 38  | 53  | 44  | 53  | 38  | 44  | 44  | 53  | 38  | 44  | 53  | 38  |
| 60 kDa heat shock protein, mitochondrial OS=Mus musculus GN=Hspd1 PE=1 SV=1                                | CH60_MOUSE          | 61 kDa  | 1  | 48  | 37  | 37  | 37  | 48  | 37  | 37  | 37  | 48  | 37  | 37  | 48  |
| Electron transfer flavoprotein-ubiquinone oxidoreductase, mitochondrial OS=Mus mu ETFD_MOUSE               | ETFD_MOUSE          | 68 kDa  | 1  | 37  | 44  | 53  | 44  | 37  | 53  | 53  | 44  | 37  | 53  | 44  | 37  |
| Pyruvate dehydrogenase E1 component subunit alpha, somatic form, mitochondrial CODPA_MOUSE                 | CODPA_MOUSE         | 43 kDa  | 1  | 37  | 36  | 41  | 36  | 37  | 41  | 41  | 36  | 37  | 41  | 36  | 37  |
| Vinculin OS=Mus musculus GN=Vcl PE=1 SV=4                                                                  | VINC_MOUSE          | 117 kDa | 1  | 50  | 59  | 57  | 59  | 50  | 57  | 57  | 59  | 50  | 57  | 59  | 50  |
| Cluster of Cytochrome c, somatic OS=Mus musculus GN=Cycs PE=1 SV=2 (CYC_MOUSE CYC_MOUSE [2])               | CYC_MOUSE [2]       | 12 kDa  | 1  | 17  | 15  | 22  | 15  | 17  | 22  | 22  | 15  | 17  | 22  | 15  | 17  |
| ATP synthase subunit gamma OS=Mus musculus GN=Atp5c1 PE=3 SV=1                                             | A2AKU9_MOUSE        | 33 kDa  | 1  | 25  | 33  | 29  | 33  | 25  | 29  | 29  | 33  | 25  | 29  | 33  | 25  |
| Cluster of Sodium/potassium-transporting ATPase subunit alpha-1 OS=Mus musculus AT1A1_MOUSE [6]            | AT1A1_MOUSE [6]     | 113 kDa | 1  | 38  | 44  | 52  | 44  | 38  | 52  | 52  | 44  | 38  | 52  | 44  | 38  |
| Succinyl-CoA ligase [ADP-forming] subunit beta, mitochondrial OS=Mus musculus GN=SUCB1_MOUSE               | SUCB1_MOUSE         | 50 kDa  | 1  | 35  | 35  | 35  | 35  | 35  | 35  | 35  | 35  | 35  | 35  | 35  | 35  |
| Cytochrome b-c1 complex subunit 1, mitochondrial OS=Mus musculus GN=Uqcrc1 PE: QCR1_MOUSE                  | QCR1_MOUSE          | 53 kDa  | 1  | 36  | 33  | 35  | 33  | 36  | 35  | 35  | 33  | 36  | 35  | 33  | 36  |
| Cluster of Histone H2B type 1-H OS=Mus musculus GN=Hist1h2bh PE=1 SV=3 (H2B1H_MOUSE H2B1H_MOUSE [6])       | H2B1H_MOUSE [6]     | 14 kDa  | 1  | 13  | 16  | 11  | 16  | 13  | 11  | 11  | 16  | 13  | 11  | 16  | 13  |
| Cluster of LIM domain-binding protein 3 OS=Mus musculus GN=Ldb3 PE=1 SV=1 (LDB:LDB3_MOUSE [2])             | LDB3_MOUSE [2]      | 76 kDa  | 1  | 30  | 39  | 39  | 39  | 30  | 39  | 39  | 39  | 30  | 39  | 39  | 30  |
| Pyruvate dehydrogenase E1 component subunit beta, mitochondrial OS=Mus musculus ODPB_MOUSE                 | ODPB_MOUSE          | 39 kDa  | 1  | 26  | 30  | 33  | 30  | 26  | 33  | 33  | 30  | 26  | 33  | 30  | 26  |
| Troponin C, slow skeletal and cardiac muscles OS=Mus musculus GN=Tnnc1 PE=2 SV=: TNNC1_MOUSE               | TNNC1_MOUSE         | 18 kDa  | 1  | 23  | 17  | 17  | 23  | 17  | 17  | 17  | 23  | 17  | 17  | 23  | 17  |
| Succinate dehydrogenase [ubiquinone] iron-sulfur subunit, mitochondrial OS=Mus ml DHSB_MOUSE               | DHSB_MOUSE          | 32 kDa  | 1  | 26  | 32  | 29  | 32  | 26  | 29  | 29  | 32  | 26  | 29  | 32  | 26  |
| Cluster of Phosphoglycerate mutase 2 OS=Mus musculus GN=Pgam2 PE=1 SV=3 (PGAI_PGAM2_MOUSE [2])             | PGAM2_MOUSE [2]     | 29 kDa  | 1  | 32  | 41  | 41  | 41  | 32  | 41  | 41  | 41  | 32  | 41  | 41  | 32  |

|                                                                                   |                          |         |   |    |    |    |    |    |    |    |    |    |    |    |    |
|-----------------------------------------------------------------------------------|--------------------------|---------|---|----|----|----|----|----|----|----|----|----|----|----|----|
| 2-oxoglutarate dehydrogenase, mitochondrial OS=Mus musculus GN=Ogdh PE=1 SV=:     | ODO1_MOUSE               | 116 kDa | 1 | 36 | 41 | 50 | 41 | 36 | 50 | 50 | 41 | 36 | 50 | 41 | 36 |
| Dihydropyridol dehydrogenase, mitochondrial OS=Mus musculus GN=Dld PE=1 SV=2      | DLDH_MOUSE               | 54 kDa  | 1 | 25 | 32 | 34 | 32 | 25 | 34 | 34 | 32 | 25 | 34 | 32 | 25 |
| Cytochrome c oxidase subunit 5A, mitochondrial OS=Mus musculus GN=Cox5a PE=1 S    | COX5A_MOUSE              | 16 kDa  | 1 | 21 | 23 | 22 | 23 | 22 | 23 | 22 | 23 | 21 | 22 | 23 | 21 |
| Enoyl-CoA hydratase, mitochondrial OS=Mus musculus GN=Echs1 PE=1 SV=1             | ECHM_MOUSE               | 31 kDa  | 1 | 24 | 29 | 26 | 29 | 24 | 26 | 26 | 29 | 24 | 26 | 29 | 24 |
| Cluster of Annexin A6 OS=Mus musculus GN=Anxa6 PE=1 SV=3 (ANXA6_MOUSE)            | ANXA6_MOUSE [2]          | 76 kDa  | 1 | 42 | 35 | 40 | 35 | 42 | 40 | 40 | 35 | 42 | 40 | 35 | 42 |
| Cluster of Prelamin-A/C OS=Mus musculus GN=Lmna PE=1 SV=2 (LMNA_MOUSE)            | LMNA_MOUSE [2]           | 74 kDa  | 1 | 34 | 43 | 45 | 43 | 34 | 45 | 45 | 43 | 34 | 45 | 43 | 34 |
| MCG10343, isoform CRA_b OS=Mus musculus GN=Slc25a3 PE=3 SV=1                      | GSE902_MOUSE             | 40 kDa  | 1 | 19 | 23 | 27 | 23 | 19 | 27 | 27 | 23 | 19 | 27 | 23 | 19 |
| Cluster of NADH dehydrogenase [ubiquinone] flavoprotein 1, mitochondrial OS=Mus   | NDUVU1_MOUSE [2]         | 51 kDa  | 1 | 26 | 25 | 20 | 25 | 26 | 20 | 20 | 25 | 26 | 20 | 25 | 26 |
| Apolipoprotein A-I OS=Mus musculus GN=Apoa1 PE=1 SV=2                             | APOA1_MOUSE              | 31 kDa  | 1 | 33 | 25 | 32 | 25 | 33 | 32 | 32 | 25 | 33 | 32 | 25 | 33 |
| Elongation factor Tu OS=Mus musculus GN=Gm9755 PE=3 SV=1                          | D3YVN7_MOUSE (+1)        | 50 kDa  | 1 | 32 | 36 | 37 | 36 | 32 | 37 | 37 | 36 | 32 | 37 | 36 | 32 |
| Triosephosphate isomerase OS=Mus musculus GN=Tpi1 PE=1 SV=4                       | TPIS_MOUSE               | 32 kDa  | 1 | 17 | 32 | 27 | 32 | 17 | 27 | 27 | 32 | 17 | 27 | 32 | 17 |
| ATP synthase-coupling factor 6, mitochondrial OS=Mus musculus GN=Atp5j PE=1 SV=:  | ATP5J_MOUSE              | 12 kDa  | 1 | 18 | 17 | 16 | 17 | 18 | 16 | 16 | 17 | 18 | 16 | 17 | 18 |
| Spectrin beta chain, non-erythrocytic 1 OS=Mus musculus GN=Sptbn1 PE=1 SV=2       | SPTB2_MOUSE              | 274 kDa | 1 | 34 | 48 | 44 | 48 | 34 | 44 | 44 | 48 | 34 | 44 | 48 | 34 |
| Cluster of Histone H1.4 OS=Mus musculus GN=Hist1h1e PE=1 SV=2 (H14_MOUSE)         | H14_MOUSE [3]            | 22 kDa  | 1 | 21 | 27 | 24 | 27 | 21 | 24 | 24 | 27 | 21 | 24 | 27 | 21 |
| Hydroxyacyl-coenzyme A dehydrogenase, mitochondrial OS=Mus musculus GN=Hadh       | HCDD_MOUSE               | 34 kDa  | 1 | 20 | 21 | 22 | 21 | 20 | 22 | 22 | 21 | 20 | 22 | 21 | 20 |
| Nascent polypeptide-associated complex subunit alpha, muscle-specific form OS=Mus | NACAM_MOUSE              | 220 kDa | 1 | 19 | 37 | 46 | 37 | 19 | 46 | 46 | 37 | 19 | 46 | 37 | 19 |
| Cluster of Glutathione S-transferase Mu 1 OS=Mus musculus GN=Gstm1 PE=1 SV=2      | GSTM1_MOUSE [5]          | 26 kDa  | 1 | 30 | 41 | 36 | 41 | 30 | 36 | 36 | 41 | 30 | 36 | 41 | 30 |
| Trypsin OS=Sus scrofa PE=1 SV=1                                                   | TRYP_PIG                 | 24 kDa  | 1 | 14 | 13 | 13 | 13 | 14 | 13 | 13 | 13 | 14 | 13 | 13 | 14 |
| Cluster of Alpha-1-antitrypsin 1-1 OS=Mus musculus GN=Serpina1a PE=1 SV=4 (A1AT1  | A1AT1_MOUSE [4]          | 46 kDa  | 1 | 28 | 30 | 27 | 30 | 28 | 27 | 27 | 30 | 28 | 27 | 30 | 28 |
| Alpha-crystallin B chain OS=Mus musculus GN=Cryab PE=1 SV=2                       | CRYAB_MOUSE              | 20 kDa  | 1 | 21 | 18 | 17 | 18 | 21 | 17 | 17 | 18 | 21 | 17 | 18 | 21 |
| Isoform Cytoplasmic-peroxisomal of Peroxiredoxin-5, mitochondrial OS=Mus muscul   | sp P99029-2 PRDX5_MOUSE? |         | 1 | 20 | 13 | 19 | 13 | 20 | 19 | 19 | 13 | 20 | 19 | 13 | 20 |
| Cluster of Cytochrome c oxidase subunit 4 isoform 1, mitochondrial OS=Mus musculu | COX4I1_MOUSE [2]         | 20 kDa  | 1 | 25 | 17 | 19 | 17 | 25 | 19 | 19 | 17 | 25 | 19 | 17 | 25 |
| Iso citrate dehydrogenase 3 (NAD+) beta OS=Mus musculus GN=ldh3b PE=2 SV=1        | Q91VA7_MOUSE             | 42 kDa  | 1 | 19 | 31 | 29 | 31 | 19 | 29 | 29 | 31 | 19 | 29 | 31 | 19 |
| Dihydropyridylsine-residue acetyltransferase component of pyruvate dehydrogenase  | ODP2_MOUSE               | 68 kDa  | 1 | 21 | 27 | 26 | 27 | 21 | 26 | 26 | 27 | 21 | 26 | 27 | 21 |
| Cluster of ATP synthase subunit O, mitochondrial OS=Mus musculus GN=Atp5o PE=1    | ATPO_MOUSE               | 23 kDa  | 1 | 17 | 18 | 17 | 18 | 17 | 17 | 17 | 18 | 17 | 17 | 18 | 17 |
| Succinyl-CoA:3-ketoacid coenzyme A transferase 1, mitochondrial OS=Mus musculus   | (SCOT1_MOUSE             | 56 kDa  | 1 | 17 | 27 | 27 | 27 | 17 | 27 | 27 | 27 | 17 | 27 | 27 | 17 |
| 10 kDa heat shock protein, mitochondrial OS=Mus musculus GN=Hspe1 PE=1 SV=2       | CH10_MOUSE               | 11 kDa  | 1 | 12 | 15 | 16 | 15 | 12 | 16 | 16 | 15 | 12 | 16 | 15 | 12 |
| Cluster of L-lactate dehydrogenase OS=Mus musculus GN=Ldha PE=3 SV=1 (GSE8N5_     | JGSE8N5_MOUSE [3]        | 40 kDa  | 1 | 21 | 19 | 20 | 19 | 21 | 20 | 20 | 19 | 21 | 20 | 19 | 21 |
| Superoxide dismutase [Mn], mitochondrial OS=Mus musculus GN=Sod2 PE=1 SV=3        | SODM_MOUSE               | 25 kDa  | 1 | 16 | 20 | 19 | 20 | 16 | 19 | 19 | 20 | 16 | 19 | 20 | 16 |
| Cluster of Tubulin beta-4B chain OS=Mus musculus GN=Tubb4b PE=1 SV=1 (TBB4B_M     | TBB4B_MOUSE [4]          | 50 kDa  | 1 | 20 | 32 | 32 | 32 | 20 | 32 | 32 | 32 | 20 | 32 | 32 | 20 |
| Myozenin-2 OS=Mus musculus GN=Myoz2 PE=1 SV=1                                     | MYOZ2_MOUSE              | 30 kDa  | 1 | 24 | 28 | 28 | 28 | 24 | 28 | 28 | 28 | 24 | 28 | 28 | 24 |
| Succinyl-CoA ligase [ADP/GDP-forming] subunit alpha, mitochondrial OS=Mus muscul  | SUCA_MOUSE               | 36 kDa  | 1 | 24 | 27 | 25 | 27 | 24 | 25 | 25 | 27 | 24 | 25 | 27 | 24 |
| ATP synthase subunit b, mitochondrial OS=Mus musculus GN=Atp5f1 PE=1 SV=1         | AT5F1_MOUSE              | 29 kDa  | 1 | 23 | 23 | 20 | 23 | 23 | 20 | 20 | 23 | 23 | 20 | 23 | 23 |
| Cluster of Carnitine O-palmitoyltransferase 2, mitochondrial OS=Mus musculus GN=C | CPT2_MOUSE               | 74 kDa  | 1 | 21 | 33 | 30 | 33 | 21 | 30 | 30 | 33 | 21 | 30 | 33 | 21 |
| Cytochrome c oxidase subunit 6B1 OS=Mus musculus GN=Cox6b1 PE=1 SV=2              | CX6B1_MOUSE              | 10 kDa  | 1 | 11 | 11 | 8  | 11 | 11 | 8  | 8  | 11 | 11 | 8  | 11 | 11 |
| Cluster of Basement membrane-specific heparan sulfate proteoglycan core protein O | B1B0C7_MOUSE [2]         | 469 kDa | 1 | 28 | 51 | 42 | 51 | 28 | 42 | 42 | 51 | 28 | 42 | 51 | 28 |
| Cluster of Peroxiredoxin-1 OS=Mus musculus GN=Prdx1 PE=1 SV=1 (PRDX1_MOUSE)       | PRDX1_MOUSE              | 22 kDa  | 1 | 19 | 20 | 19 | 20 | 19 | 19 | 19 | 20 | 19 | 19 | 20 | 19 |
| Cluster of Nucleoside diphosphate kinase OS=Mus musculus GN=Gm20390 PE=2 SV=1     | E9PZF0_MOUSE [3]         | 30 kDa  | 1 | 17 | 26 | 22 | 26 | 17 | 22 | 22 | 26 | 17 | 22 | 26 | 17 |
| Enoyl-CoA delta isomerase 1, mitochondrial OS=Mus musculus GN=Eci1 PE=2 SV=2      | ECI1_MOUSE               | 32 kDa  | 1 | 24 | 28 | 26 | 28 | 24 | 26 | 26 | 28 | 24 | 26 | 28 | 24 |
| Cluster of Sorbin and SH3 domain-containing protein 2 OS=Mus musculus GN=Sorbs2   | B2RX09_MOUSE [5]         | 72 kDa  | 1 | 23 | 27 | 35 | 27 | 23 | 35 | 35 | 27 | 23 | 35 | 27 | 23 |
| Cluster of ATP synthase subunit d, mitochondrial OS=Mus musculus GN=Atp5h PE=1    | SATP5H_MOUSE [2]         | 19 kDa  | 1 | 22 | 18 | 19 | 18 | 22 | 19 | 19 | 18 | 22 | 19 | 18 | 22 |
| Cluster of Isoform 2 of Adenylate kinase isoenzyme 1 OS=Mus musculus GN=Ak1 (sp   | sp Q9R0Y5-2 KAD1_MOUSE?  |         | 1 | 14 | 19 | 19 | 19 | 14 | 19 | 19 | 19 | 14 | 19 | 19 | 14 |
| 78 kDa glucose-regulated protein OS=Mus musculus GN=Hspa5 PE=1 SV=3               | GRP78_MOUSE              | 72 kDa  | 1 | 30 | 27 | 27 | 27 | 30 | 27 | 27 | 27 | 30 | 27 | 27 | 30 |
| Carnitine O-palmitoyltransferase 1, muscle isoform OS=Mus musculus GN=Cpt1b PE=:  | CPT1B_MOUSE              | 88 kDa  | 1 | 20 | 23 | 26 | 23 | 20 | 26 | 26 | 23 | 20 | 26 | 23 | 20 |
| Phosphoglucomutase-1 OS=Mus musculus GN=Pgm1 PE=1 SV=4                            | PGM1_MOUSE               | 61 kDa  | 1 | 20 | 27 | 26 | 27 | 20 | 26 | 26 | 27 | 20 | 26 | 27 | 20 |
| Filamin-C OS=Mus musculus GN=Flnc PE=1 SV=3                                       | FLNC_MOUSE               | 291 kDa | 1 | 29 | 36 | 41 | 36 | 29 | 41 | 41 | 36 | 29 | 41 | 36 | 29 |
| Dihydropyridylsine-residue succinyltransferase component of 2-oxoglutarate dehydr | ODO2_MOUSE               | 49 kDa  | 1 | 13 | 12 | 17 | 12 | 13 | 17 | 17 | 12 | 13 | 17 | 12 | 13 |
| Thioredoxin-dependent peroxide reductase, mitochondrial OS=Mus musculus GN=Pr     | PrC PRDX3_MOUSE          | 28 kDa  | 1 | 14 | 16 | 17 | 16 | 14 | 17 | 17 | 16 | 14 | 17 | 16 | 14 |
| Transitional endoplasmic reticulum ATPase OS=Mus musculus GN=Vcp PE=1 SV=4        | TERA_MOUSE               | 89 kDa  | 1 | 23 | 22 | 28 | 22 | 23 | 28 | 28 | 22 | 23 | 28 | 22 | 23 |
| NADH dehydrogenase [ubiquinone] iron-sulfur protein 2, mitochondrial OS=Mus mus   | NDU52_MOUSE              | 53 kDa  | 1 | 19 | 20 | 25 | 20 | 19 | 25 | 25 | 20 | 19 | 25 | 20 | 19 |
| NADH dehydrogenase [ubiquinone] 1 alpha subcomplex subunit 10, mitochondrial      | OS=NDUAA_MOUSE           | 41 kDa  | 1 | 19 | 20 | 16 | 20 | 19 | 16 | 16 | 20 | 19 | 16 | 20 | 19 |
| Alpha-2-macroglobulin OS=Mus musculus GN=A2m PE=1 SV=3                            | A2M_MOUSE (+1)           | 166 kDa | 1 | 20 | 27 | 27 | 27 | 20 | 27 | 27 | 27 | 20 | 27 | 27 | 20 |
| Cluster of Glucose-6-phosphate isomerase OS=Mus musculus GN=Gpi PE=1 SV=4 (G6P    | G6PI_MOUSE [2]           | 63 kDa  | 1 | 16 | 17 | 23 | 17 | 16 | 23 | 23 | 17 | 16 | 23 | 17 | 16 |
| 2,4-dienoyl-CoA reductase, mitochondrial OS=Mus musculus GN=Decr1 PE=1 SV=1       | DECR_MOUSE               | 36 kDa  | 1 | 12 | 13 | 13 | 13 | 12 | 13 | 13 | 13 | 12 | 13 | 13 | 12 |
| Aldose reductase OS=Mus musculus GN=Akr1b1 PE=1 SV=3                              | ALDR_MOUSE               | 36 kDa  | 1 | 24 | 29 | 26 | 29 | 24 | 26 | 26 | 29 | 24 | 26 | 29 | 24 |
| ES1 protein homolog, mitochondrial OS=Mus musculus GN=D10Jhu81e PE=1 SV=1         | ES1_MOUSE                | 28 kDa  | 1 | 15 | 16 | 17 | 16 | 15 | 17 | 17 | 16 | 15 | 17 | 16 | 15 |
| Cytochrome b-c1 complex subunit 6, mitochondrial OS=Mus musculus GN=Uqcqh PE=     | QCR6_MOUSE               | 10 kDa  | 1 | 16 | 11 | 8  | 11 | 16 | 8  | 8  | 11 | 16 | 8  | 11 | 16 |
| Cytochrome b-c1 complex subunit Rieske, mitochondrial OS=Mus musculus GN=Uqcrl    | CRC1_MOUSE               | 29 kDa  | 1 | 15 | 14 | 17 | 14 | 15 | 17 | 17 | 14 | 15 | 17 | 14 | 15 |
| Voltage-dependent anion-selective channel protein 3 OS=Mus musculus GN=Vdac3      | P1J3QM3_MOUSE (+1)       | 31 kDa  | 1 | 12 | 15 | 17 | 15 | 12 | 17 | 17 | 15 | 12 | 17 | 15 | 12 |
| Polymerase I and transcript release factor OS=Mus musculus GN=Ptrf PE=1 SV=1      | PTRF_MOUSE               | 44 kDa  | 1 | 20 | 21 | 23 | 21 | 20 | 23 | 23 | 21 | 20 | 23 | 21 | 20 |
| Cluster of Tubulin alpha-4A chain OS=Mus musculus GN=Tuba4a PE=1 SV=1 (TBA4A_A    | TBA4A_MOUSE [5]          | 50 kDa  | 1 | 25 | 20 | 25 | 20 | 25 | 25 | 25 | 20 | 25 | 25 | 20 | 25 |
| NADH dehydrogenase [ubiquinone] flavoprotein 2, mitochondrial OS=Mus musculus     | NDUV2_MOUSE              | 27 kDa  | 1 | 14 | 20 | 21 | 20 | 14 | 21 | 21 | 20 | 14 | 21 | 20 | 14 |
| Methylmalonate-semialdehyde dehydrogenase [acylating], mitochondrial OS=Mus       | mtMMSA_MOUSE             | 58 kDa  | 1 | 20 | 21 | 27 | 21 | 20 | 27 | 27 | 21 | 20 | 27 | 21 | 20 |
| Delta(3,5)-Delta(2,4)-dienoyl-CoA isomerase, mitochondrial OS=Mus musculus GN=    | Ec ECH1_MOUSE            | 36 kDa  | 1 | 21 | 20 | 19 | 20 | 21 | 19 | 19 | 20 | 21 | 19 | 20 | 21 |
| Cysteine and glycine-rich protein 3 OS=Mus musculus GN=Csrp3 PE=1 SV=1            | CSR3_MOUSE               | 21 kDa  | 1 | 18 | 22 | 18 | 22 | 18 | 18 | 18 | 22 | 18 | 18 | 22 | 18 |
| Dystrophin OS=Mus musculus GN=Dmd PE=1 SV=3                                       | DMD_MOUSE                | 426 kDa | 1 | 20 | 22 | 19 | 22 | 20 | 19 | 19 | 22 | 20 | 19 | 22 | 20 |

|                                                                                                          |         |   |    |    |    |    |    |    |    |    |    |    |    |    |    |    |
|----------------------------------------------------------------------------------------------------------|---------|---|----|----|----|----|----|----|----|----|----|----|----|----|----|----|
| Myosin regulatory light chain 2, atrial isoform OS=Mus musculus GN=Myl7 PE=2 SV=1 MLRA_MOUSE             | 19 kDa  | 1 | 32 | 18 | 23 | 18 | 23 | 18 | 32 | 23 | 23 | 18 | 32 | 23 | 18 | 32 |
| Cluster of Ubiquitin-40S ribosomal protein S27a OS=Mus musculus GN=Rps27a PE=1 RS27A_MOUSE [2]           | 18 kDa  | 1 | 9  | 14 | 11 | 14 | 9  | 11 | 11 | 14 | 9  | 11 | 14 | 9  | 11 | 14 |
| Cluster of Acyl-coenzyme A thioesterase 2, mitochondrial OS=Mus musculus GN=Acot ACOT2_MOUSE [3]         | 50 kDa  | 1 | 20 | 14 | 14 | 14 | 20 | 14 | 14 | 14 | 14 | 20 | 14 | 14 | 14 | 20 |
| Cytochrome c1, heme protein, mitochondrial OS=Mus musculus GN=Cyc1 PE=1 SV=1 CY1_MOUSE                   | 35 kDa  | 1 | 12 | 14 | 14 | 14 | 12 | 14 | 14 | 14 | 14 | 12 | 14 | 14 | 14 | 12 |
| NADH dehydrogenase [ubiquinone] iron-sulfur protein 3, mitochondrial OS=Mus musculus NDUS3_MOUSE         | 30 kDa  | 1 | 13 | 15 | 14 | 15 | 13 | 14 | 14 | 14 | 15 | 13 | 14 | 15 | 13 | 14 |
| NADH dehydrogenase [ubiquinone] iron-sulfur protein 6, mitochondrial OS=Mus musculus NDUS6_MOUSE         | 13 kDa  | 1 | 14 | 13 | 15 | 13 | 14 | 15 | 15 | 13 | 14 | 15 | 13 | 14 | 15 | 13 |
| Cluster of Histone H3.1 OS=Mus musculus GN=Hist1h3a PE=1 SV=2 (H31_MOUSE) H31_MOUSE [4]                  | 15 kDa  | 1 | 6  | 10 | 9  | 10 | 6  | 9  | 9  | 10 | 6  | 9  | 10 | 6  | 9  | 10 |
| Cluster of PDZ and LIM domain protein 5 OS=Mus musculus GN=Pdlim5 PE=1 SV=4 (PDLIM5_MOUSE [3])           | 63 kDa  | 1 | 16 | 21 | 17 | 21 | 16 | 17 | 17 | 21 | 16 | 17 | 21 | 16 | 17 | 21 |
| Protein NipSnap homolog 2 OS=Mus musculus GN=Gbas PE=2 SV=1                                              | 33 kDa  | 1 | 15 | 18 | 18 | 18 | 15 | 18 | 18 | 18 | 18 | 15 | 18 | 18 | 18 | 15 |
| Cluster of Propionyl-CoA carboxylase alpha chain, mitochondrial OS=Mus musculus GIPCCA_MOUSE [2]         | 80 kDa  | 1 | 17 | 22 | 20 | 22 | 17 | 20 | 20 | 22 | 17 | 20 | 22 | 17 | 20 | 22 |
| Cluster of Alpha-enolase OS=Mus musculus GN=Eno1 PE=1 SV=3 (ENOA_MOUSE) ENOA_MOUSE [2]                   | 47 kDa  | 1 | 19 | 14 | 16 | 14 | 19 | 16 | 16 | 14 | 19 | 16 | 14 | 19 | 16 | 14 |
| Acyl carrier protein, mitochondrial OS=Mus musculus GN=Ndufab1 PE=1 SV=1                                 | 17 kDa  | 1 | 13 | 0  | 0  | 13 | 0  | 0  | 0  | 13 | 0  | 0  | 13 | 0  | 0  | 13 |
| Elongation factor 1-alpha 2 OS=Mus musculus GN=Eef1a2 PE=1 SV=1                                          | 50 kDa  | 1 | 9  | 14 | 11 | 14 | 9  | 11 | 11 | 14 | 9  | 11 | 14 | 9  | 11 | 14 |
| Peptidyl-prolyl cis-trans isomerase A OS=Mus musculus GN=Ppia PE=1 SV=2                                  | 18 kDa  | 1 | 10 | 9  | 10 | 9  | 10 | 10 | 10 | 9  | 10 | 10 | 9  | 10 | 10 | 9  |
| NADH dehydrogenase [ubiquinone] 1 alpha subcomplex subunit 7 OS=Mus musculus NDUA7_MOUSE                 | 13 kDa  | 1 | 12 | 14 | 18 | 14 | 12 | 18 | 18 | 14 | 12 | 18 | 14 | 12 | 18 | 14 |
| Heterogeneous nuclear ribonucleoproteins A2/B1 OS=Mus musculus GN=Hnrnpa2b1 ROA2_MOUSE                   | 37 kDa  | 1 | 12 | 20 | 19 | 20 | 12 | 19 | 19 | 20 | 12 | 19 | 20 | 12 | 19 | 20 |
| Ubiquinone biosynthesis protein COQ9, mitochondrial OS=Mus musculus GN=Coo9 PFCOQ9_MOUSE                 | 35 kDa  | 1 | 13 | 21 | 15 | 21 | 13 | 15 | 15 | 21 | 13 | 15 | 21 | 13 | 15 | 21 |
| NADH dehydrogenase [ubiquinone] iron-sulfur protein 8, mitochondrial OS=Mus musculus NDUS8_MOUSE         | 24 kDa  | 1 | 10 | 13 | 12 | 13 | 10 | 12 | 12 | 13 | 10 | 12 | 13 | 10 | 12 | 13 |
| Peroxisome oxidase OS=Mus musculus GN=Prdx6 PE=2 SV=1                                                    | 22 kDa  | 1 | 12 | 12 | 17 | 12 | 12 | 17 | 17 | 12 | 12 | 17 | 12 | 12 | 17 | 12 |
| Cluster of Talin-1 OS=Mus musculus GN=Tln1 PE=1 SV=2 (TLN1_MOUSE) TLN1_MOUSE                             | 270 kDa | 1 | 18 | 23 | 16 | 23 | 18 | 16 | 16 | 23 | 18 | 16 | 23 | 18 | 16 | 23 |
| Myosin-9 OS=Mus musculus GN=Myh9 PE=1 SV=4                                                               | 226 kDa | 1 | 16 | 14 | 12 | 14 | 16 | 12 | 12 | 14 | 16 | 12 | 14 | 16 | 12 | 14 |
| Cluster of Serine protease inhibitor A3K OS=Mus musculus GN=Serpina3k PE=1 SV=2 (SPA3K_MOUSE [2])        | 47 kDa  | 1 | 16 | 12 | 8  | 12 | 16 | 8  | 8  | 12 | 16 | 8  | 12 | 16 | 8  | 12 |
| UTP--glucose-1-phosphate uridylyltransferase OS=Mus musculus GN=Ugp2 PE=2 SV=3 UGPA_MOUSE                | 57 kDa  | 1 | 12 | 15 | 19 | 15 | 12 | 19 | 19 | 15 | 12 | 19 | 15 | 12 | 19 | 15 |
| Apoptosis-inducing factor 1, mitochondrial OS=Mus musculus GN=Aifm1 PE=1 SV=1                            | 67 kDa  | 1 | 18 | 19 | 22 | 19 | 18 | 22 | 22 | 19 | 18 | 22 | 19 | 18 | 22 | 19 |
| Cytochrome c oxidase subunit 6C OS=Mus musculus GN=Cox6c PE=1 SV=3                                       | 8 kDa   | 1 | 9  | 10 | 8  | 10 | 9  | 8  | 8  | 10 | 9  | 8  | 10 | 9  | 8  | 10 |
| Four and a half LIM domains protein 2 OS=Mus musculus GN=Fhl2 PE=1 SV=1                                  | 32 kDa  | 1 | 14 | 22 | 21 | 22 | 14 | 21 | 21 | 22 | 14 | 21 | 22 | 14 | 21 | 22 |
| Lon protease homolog, mitochondrial OS=Mus musculus GN=Lonp1 PE=1 SV=2                                   | 106 kDa | 1 | 16 | 16 | 12 | 16 | 16 | 12 | 12 | 16 | 16 | 12 | 16 | 16 | 12 | 16 |
| NADH dehydrogenase [ubiquinone] 1 alpha subcomplex subunit 8 OS=Mus musculus NDUA8_MOUSE                 | 20 kDa  | 1 | 12 | 17 | 18 | 17 | 12 | 18 | 18 | 17 | 12 | 18 | 17 | 12 | 18 | 17 |
| Cluster of Sorbin and SH3 domain-containing protein 1 OS=Mus musculus GN=Sorbs1 SRBS1_MOUSE [2]          | 143 kDa | 1 | 17 | 20 | 19 | 20 | 17 | 19 | 19 | 20 | 17 | 19 | 20 | 17 | 19 | 20 |
| Calsequestrin-2 OS=Mus musculus GN=Casq2 PE=2 SV=3                                                       | 48 kDa  | 1 | 10 | 7  | 8  | 7  | 10 | 8  | 8  | 7  | 10 | 8  | 7  | 10 | 8  | 7  |
| Isocitrate dehydrogenase [NAD] subunit gamma 1, mitochondrial OS=Mus musculus CIDHG1_MOUSE               | 43 kDa  | 1 | 16 | 11 | 14 | 11 | 16 | 14 | 14 | 11 | 16 | 14 | 11 | 16 | 14 | 11 |
| Cluster of Actin-binding LIM protein 1 OS=Mus musculus GN=Ablim1 PE=2 SV=1 (EQ9:EQ9C1_MOUSE [2])         | 84 kDa  | 1 | 13 | 15 | 26 | 15 | 13 | 26 | 26 | 15 | 13 | 26 | 15 | 13 | 26 | 15 |
| Laminin subunit gamma-1 OS=Mus musculus GN=Lamc1 PE=2 SV=1                                               | 177 kDa | 1 | 15 | 22 | 19 | 22 | 15 | 19 | 19 | 22 | 15 | 19 | 22 | 15 | 19 | 22 |
| Histone H1.5 OS=Mus musculus GN=Hist1h1b PE=1 SV=2                                                       | 23 kDa  | 1 | 5  | 5  | 7  | 5  | 5  | 7  | 7  | 5  | 5  | 7  | 5  | 5  | 7  | 5  |
| Prohibitin OS=Mus musculus GN=Phb PE=1 SV=1                                                              | 30 kDa  | 1 | 16 | 15 | 15 | 15 | 16 | 15 | 15 | 16 | 15 | 15 | 16 | 15 | 15 | 16 |
| Cytochrome b-c1 complex subunit 8 OS=Mus musculus GN=Uqcrcq PE=1 SV=3                                    | 10 kDa  | 1 | 7  | 12 | 10 | 12 | 7  | 10 | 12 | 7  | 10 | 12 | 7  | 10 | 12 | 7  |
| Heat shock protein beta-1 OS=Mus musculus GN=Hspb1 PE=1 SV=3                                             | 23 kDa  | 1 | 15 | 17 | 11 | 17 | 15 | 11 | 11 | 17 | 15 | 11 | 17 | 15 | 11 | 17 |
| Cluster of Superoxide dismutase [Cu-Zn] OS=Mus musculus GN=Sod1 PE=1 SV=2 (SOD SODC_MOUSE)               | 16 kDa  | 1 | 9  | 24 | 21 | 24 | 9  | 21 | 21 | 24 | 9  | 21 | 24 | 9  | 21 | 24 |
| Moesin OS=Mus musculus GN=Msn PE=1 SV=3                                                                  | 68 kDa  | 1 | 15 | 17 | 16 | 17 | 15 | 16 | 16 | 17 | 15 | 16 | 17 | 15 | 16 | 17 |
| NADH dehydrogenase [ubiquinone] 1 alpha subcomplex subunit 4 OS=Mus musculus NDUA4_MOUSE                 | 9 kDa   | 1 | 10 | 13 | 12 | 13 | 10 | 12 | 12 | 13 | 10 | 12 | 13 | 10 | 12 | 13 |
| Cluster of 3-hydroxyisobutyryl-CoA hydrolase, mitochondrial OS=Mus musculus GN=HHIBCH_MOUSE [2]          | 43 kDa  | 1 | 16 | 20 | 16 | 20 | 16 | 16 | 16 | 20 | 16 | 16 | 20 | 16 | 16 | 20 |
| Plakophilin 2 OS=Mus musculus GN=Pkp2 PE=2 SV=1                                                          | 88 kDa  | 1 | 16 | 17 | 16 | 17 | 16 | 16 | 16 | 17 | 16 | 16 | 17 | 16 | 16 | 17 |
| Cluster of Ribosome-binding protein 1 OS=Mus musculus GN=Rrbp1 PE=2 SV=1 (A2AV A2AVJ7_MOUSE [2])         | 158 kDa | 1 | 6  | 15 | 16 | 15 | 6  | 16 | 16 | 15 | 6  | 16 | 15 | 6  | 16 | 15 |
| Protein Trdn OS=Mus musculus GN=Trdn PE=2 SV=1                                                           | 78 kDa  | 1 | 0  | 4  | 0  | 4  | 0  | 0  | 0  | 4  | 0  | 0  | 4  | 0  | 0  | 4  |
| Protein disulfide-isomerase A3 OS=Mus musculus GN=Pdia3 PE=1 SV=2                                        | 57 kDa  | 1 | 11 | 21 | 24 | 21 | 11 | 24 | 24 | 21 | 11 | 24 | 21 | 11 | 24 | 21 |
| Junction plakoglobin OS=Mus musculus GN=Jup PE=1 SV=3                                                    | 82 kDa  | 1 | 9  | 24 | 21 | 24 | 9  | 21 | 21 | 24 | 9  | 21 | 24 | 9  | 21 | 24 |
| Calreticulin OS=Mus musculus GN=Calr PE=1 SV=1                                                           | 48 kDa  | 1 | 11 | 16 | 17 | 16 | 11 | 17 | 17 | 16 | 11 | 17 | 16 | 11 | 17 | 16 |
| NADH dehydrogenase [ubiquinone] 1 alpha subcomplex subunit 2 OS=Mus musculus NDUA2_MOUSE                 | 11 kDa  | 1 | 9  | 11 | 13 | 11 | 9  | 13 | 13 | 11 | 9  | 13 | 11 | 9  | 13 | 11 |
| Protein DJ-1 OS=Mus musculus GN=Park7 PE=1 SV=1                                                          | 20 kDa  | 1 | 13 | 18 | 15 | 18 | 13 | 15 | 15 | 18 | 13 | 15 | 18 | 13 | 15 | 18 |
| Pyruvate dehydrogenase protein X component, mitochondrial OS=Mus musculus GN=ODPX_MOUSE                  | 54 kDa  | 1 | 10 | 9  | 12 | 9  | 10 | 12 | 12 | 9  | 10 | 12 | 9  | 10 | 12 | 9  |
| Acetyl-coenzyme A synthetase 2-like, mitochondrial OS=Mus musculus GN=Acss1 PE= ACSS1_MOUSE              | 75 kDa  | 1 | 14 | 13 | 19 | 13 | 14 | 19 | 19 | 13 | 14 | 19 | 13 | 14 | 19 | 13 |
| Cluster of EH domain-containing protein 4 OS=Mus musculus GN=Ehd4 PE=1 SV=1 (EH EHD4_MOUSE [2])          | 61 kDa  | 1 | 18 | 9  | 13 | 9  | 18 | 13 | 13 | 9  | 18 | 13 | 9  | 18 | 13 | 9  |
| Hexokinase 1, isoform CRA_f OS=Mus musculus GN=Hk1 PE=3 SV=1                                             | 102 kDa | 1 | 15 | 13 | 13 | 13 | 15 | 13 | 13 | 13 | 15 | 13 | 13 | 15 | 13 | 13 |
| Cluster of Histone H2A.x OS=Mus musculus GN=H2afx PE=1 SV=2 (H2AX_MOUSE) H2AX_MOUSE [10]                 | 15 kDa  | 1 | 3  | 8  | 6  | 8  | 3  | 6  | 6  | 8  | 3  | 6  | 8  | 3  | 6  | 8  |
| Cluster of Ubiquitin-like modifier-activating enzyme 1 OS=Mus musculus GN=Uba1 PE UBA1_MOUSE [2]         | 118 kDa | 1 | 14 | 18 | 19 | 18 | 14 | 19 | 18 | 14 | 19 | 18 | 14 | 19 | 18 | 14 |
| Cytochrome c oxidase subunit 2 OS=Mus musculus GN=Mtco2 PE=1 SV=1                                        | 26 kDa  | 1 | 0  | 7  | 9  | 7  | 0  | 9  | 9  | 7  | 0  | 9  | 7  | 0  | 9  | 7  |
| EH domain-containing protein 2 OS=Mus musculus GN=Ehd2 PE=1 SV=1                                         | 61 kDa  | 1 | 13 | 10 | 9  | 10 | 13 | 9  | 9  | 10 | 13 | 9  | 9  | 10 | 13 | 9  |
| Voltage-dependent anion-selective channel protein 2 (Fragment) OS=Mus musculus G3UX26_MOUSE (+1)         | 30 kDa  | 1 | 12 | 16 | 16 | 16 | 12 | 16 | 16 | 16 | 12 | 16 | 16 | 16 | 12 | 16 |
| ATP synthase subunit delta, mitochondrial OS=Mus musculus GN=Atp5d PE=1 SV=1                             | 18 kDa  | 1 | 8  | 0  | 0  | 0  | 8  | 0  | 0  | 0  | 8  | 0  | 0  | 0  | 8  | 0  |
| Hemopexin OS=Mus musculus GN=Hpx PE=1 SV=2                                                               | 51 kDa  | 1 | 13 | 13 | 14 | 13 | 13 | 14 | 14 | 13 | 13 | 14 | 13 | 13 | 14 | 13 |
| Cluster of NADH dehydrogenase [ubiquinone] flavoprotein 3, mitochondrial OS=Mus musculus NDUV3_MOUSE [2] | 12 kDa  | 1 | 9  | 9  | 12 | 9  | 9  | 12 | 12 | 9  | 9  | 12 | 9  | 9  | 12 | 9  |
| Cluster of Murinoglobulin-1 OS=Mus musculus GN=Mug1 PE=1 SV=3 (MUG1_MOUSE) MUG1_MOUSE [2]                | 165 kDa | 1 | 8  | 8  | 9  | 8  | 8  | 9  | 8  | 8  | 9  | 8  | 8  | 9  | 8  | 8  |
| Tripartite motif-containing protein 72 OS=Mus musculus GN=Trim72 PE=1 SV=1                               | 53 kDa  | 1 | 12 | 11 | 13 | 12 | 11 | 13 | 12 | 11 | 13 | 12 | 11 | 13 | 12 | 11 |
| Cluster of Protein Neb OS=Mus musculus GN=Neb PE=2 SV=1 (A2AQA9_MOUSE) A2AQA9_MOUSE [3]                  | 801 kDa | 1 | 4  | 0  | 0  | 0  | 4  | 0  | 0  | 0  | 4  | 0  | 0  | 0  | 4  | 0  |
| Cluster of Hexokinase-2 OS=Mus musculus GN=Hk2 PE=1 SV=1 (HXK2_MOUSE) HXK2_MOUSE                         | 103 kDa | 1 | 14 | 18 | 15 | 18 | 14 | 15 | 15 | 18 | 14 | 15 | 18 | 14 | 15 | 18 |
| Nucleolin OS=Mus musculus GN=Ncl PE=1 SV=2                                                               | 77 kDa  | 1 | 13 | 11 | 11 | 11 | 13 | 11 | 11 | 11 | 13 | 11 | 11 | 11 | 11 | 13 |

|                                                                                                            |                   |         |   |    |             |    |    |    |    |    |    |    |    |    |    |
|------------------------------------------------------------------------------------------------------------|-------------------|---------|---|----|-------------|----|----|----|----|----|----|----|----|----|----|
| Serum deprivation-response protein OS=Mus musculus GN=Sdpr PE=1 SV=3                                       | SDPR_MOUSE        | 47 kDa  | 1 | 9  | 20          | 18 | 20 | 9  | 18 | 18 | 20 | 9  | 18 | 20 | 9  |
| Cluster of Kininogen-1 OS=Mus musculus GN=Kng1 PE=1 SV=1 (KNG1_MOUSE)                                      | KNG1_MOUSE [2]    | 73 kDa  | 1 | 11 | 16          | 14 | 16 | 11 | 14 | 14 | 16 | 11 | 14 | 16 | 11 |
| Prohibitin-2 OS=Mus musculus GN=Phb2 PE=1 SV=1                                                             | PHB2_MOUSE        | 33 kDa  | 1 | 13 | 13          | 18 | 13 | 13 | 18 | 18 | 13 | 13 | 18 | 13 | 13 |
| 60S ribosomal protein L4 OS=Mus musculus GN=Rpl4 PE=1 SV=3                                                 | RL4_MOUSE         | 47 kDa  | 1 | 4  | 6           | 7  | 6  | 4  | 7  | 7  | 6  | 4  | 7  | 6  | 4  |
| Cluster of Microtubule-associated protein (Fragment) OS=Mus musculus GN=Map4 PE=F7Ck47_MOUSE [2]           | MAP4_MOUSE [2]    | 153 kDa | 1 | 7  | 12          | 18 | 12 | 7  | 18 | 18 | 12 | 7  | 18 | 12 | 7  |
| Cluster of Ras-related protein Rab-1B OS=Mus musculus GN=Rab1b PE=1 SV=1 (RAB1B_MOUSE) [7]                 | RAB1B_MOUSE [7]   | 22 kDa  | 1 | 12 | 15          | 7  | 15 | 12 | 7  | 7  | 15 | 12 | 7  | 15 | 12 |
| Endoplasmic reticulum chaperone protein OS=Mus musculus GN=Hsp90b1 PE=1 SV=2                               | ENP1_MOUSE        | 92 kDa  | 1 | 9  | 14          | 17 | 14 | 9  | 17 | 17 | 14 | 9  | 17 | 14 | 9  |
| Heat shock 70 kDa protein 4 OS=Mus musculus GN=Hspa4 PE=2 SV=1                                             | Q3U2G2_MOUSE      | 94 kDa  | 1 | 9  | 16          | 14 | 16 | 9  | 14 | 14 | 16 | 9  | 14 | 16 | 9  |
| Protein-glutamine gamma-glutamyltransferase 2 OS=Mus musculus GN=Tgm2 PE=1 SV=1 (TGM2_MOUSE)               | TGM2_MOUSE        | 77 kDa  | 1 | 9  | 20          | 17 | 20 | 9  | 17 | 17 | 20 | 9  | 17 | 20 | 9  |
| Cluster of Carboxylesterase 1C OS=Mus musculus GN=Ces1c PE=1 SV=4 (EST1C_MOUSE; EST1C_MOUSE [3])           | EST1C_MOUSE [3]   | 61 kDa  | 1 | 12 | 16          | 13 | 16 | 12 | 13 | 13 | 16 | 12 | 13 | 16 | 12 |
| NADH dehydrogenase [ubiquinone] 1 subunit C2 OS=Mus musculus GN=Ndufc2 PE=1 SV=1 (NDUC2_MOUSE)             | NDUC2_MOUSE       | 14 kDa  | 1 | 9  | 11          | 12 | 11 | 9  | 12 | 12 | 11 | 9  | 12 | 11 | 9  |
| Cluster of Laminin subunit alpha-2 OS=Mus musculus GN=Lama2 PE=1 SV=1 (LAMA2_MOUSE; LAMA2_MOUSE [2])       | LAMA2_MOUSE [2]   | 343 kDa | 1 | 8  | 14          | 13 | 14 | 8  | 13 | 13 | 14 | 8  | 13 | 14 | 8  |
| Cluster of Myosin-11 OS=Mus musculus GN=Myh11 PE=1 SV=1 (MYH11_MOUSE)                                      | MYH11_MOUSE [2]   | 227 kDa | 1 | 13 | 13          | 10 | 13 | 10 | 10 | 10 | 13 | 10 | 13 | 10 | 13 |
| Cluster of Selenium-binding protein 1 OS=Mus musculus GN=Selenbp1 PE=1 SV=2 (SB_SBP1_MOUSE [2])            | SB_SBP1_MOUSE [2] | 53 kDa  | 1 | 13 | 14          | 11 | 14 | 13 | 11 | 11 | 14 | 13 | 11 | 14 | 13 |
| Cluster of Myosin light chain 4 (Fragment) OS=Mus musculus GN=Myl4 PE=2 SV=1 (A2A2A6Q8_MOUSE [3])          | Myl4_MOUSE [3]    | 21 kDa  | 1 | 18 | 8           | 10 | 8  | 18 | 10 | 10 | 8  | 18 | 10 | 8  | 18 |
| Heterogeneous nuclear ribonucleoprotein M OS=Mus musculus GN=Hnmpm PE=2 SV=2 (BNK3_MOUSE; BNK3_MOUSE (+3)) | BNK3_MOUSE (+3)   | 72 kDa  | 1 | 3  | 4           | 0  | 4  | 3  | 0  | 0  | 4  | 3  | 0  | 4  | 3  |
| Phosphatidylethanolamine-binding protein 1 OS=Mus musculus GN=Pebp1 PE=2 SV=1 (D3Z1V4_MOUSE (+1))          | Pebp1_MOUSE (+1)  | 23 kDa  | 1 | 5  | 9           | 8  | 9  | 5  | 8  | 8  | 9  | 5  | 8  | 9  | 5  |
| NADH dehydrogenase [ubiquinone] 1 alpha subcomplex subunit 6 OS=Mus musculus GN=Ndub6_MOUSE                | NDUB6_MOUSE       | 15 kDa  | 1 | 8  | 7           | 10 | 7  | 8  | 10 | 10 | 7  | 8  | 10 | 7  | 8  |
| Peroxisomal protein OS=Mus musculus GN=Prdx2 PE=1 SV=3                                                     | PRDX2_MOUSE       | 22 kDa  | 1 | 9  | 7           | 7  | 7  | 9  | 7  | 7  | 7  | 9  | 7  | 7  | 9  |
| Annexin A2 OS=Mus musculus GN=Anxa2 PE=1 SV=2                                                              | ANXA2_MOUSE       | 39 kDa  | 1 | 13 | 9           | 14 | 9  | 13 | 14 | 14 | 9  | 13 | 14 | 9  | 13 |
| Galectin-1 OS=Mus musculus GN=Lgals1 PE=1 SV=3                                                             | LEG1_MOUSE        | 15 kDa  | 1 | 10 | 15          | 11 | 15 | 10 | 11 | 11 | 15 | 10 | 11 | 15 | 10 |
| Acyl-CoA dehydrogenase family member 9, mitochondrial OS=Mus musculus GN=Aca1 ACAD9_MOUSE                  | ACAD9_MOUSE       | 69 kDa  | 1 | 8  | 13          | 13 | 13 | 8  | 13 | 13 | 13 | 8  | 13 | 13 | 8  |
| NADH dehydrogenase [ubiquinone] 1 beta subcomplex subunit 10 OS=Mus musculus GN=Ndub10_MOUSE               | NDUB10_MOUSE      | 21 kDa  | 1 | 8  | 7           | 6  | 7  | 8  | 6  | 6  | 7  | 8  | 6  | 7  | 8  |
| von Willebrand factor A domain-containing protein 8 OS=Mus musculus GN=Vwa8 PE=VWA8_MOUSE                  | VWA8_MOUSE        | 213 kDa | 1 | 13 | 17          | 18 | 17 | 13 | 18 | 18 | 17 | 13 | 18 | 17 | 13 |
| Cluster of Enoyl-CoA delta isomerase 2, mitochondrial OS=Mus musculus GN=Eci2 PE=ECI2_MOUSE [5]            | ECI2_MOUSE [5]    | 43 kDa  | 1 | 7  | 7           | 6  | 7  | 6  | 6  | 6  | 7  | 7  | 6  | 7  | 7  |
| Protein disulfide-isomerase OS=Mus musculus GN=P4hb PE=1 SV=2                                              | PDI1_MOUSE        | 57 kDa  | 1 | 14 | 10          | 10 | 10 | 14 | 10 | 10 | 10 | 14 | 10 | 10 | 14 |
| Cluster of Ankyrin-2 OS=Mus musculus GN=Ank2 PE=1 SV=2 (ANK2_MOUSE)                                        | ANK2_MOUSE [4]    | 426 kDa | 1 | 2  | 5           | 2  | 5  | 2  | 2  | 2  | 5  | 2  | 2  | 5  | 2  |
| Perilipin-4 OS=Mus musculus GN=Plin4 PE=1 SV=2                                                             | PLIN4_MOUSE       | 139 kDa | 1 | 6  | 18          | 16 | 18 | 6  | 16 | 16 | 18 | 6  | 16 | 18 | 6  |
| Tropomodulin-1 OS=Mus musculus GN=Tmod1 PE=2 SV=2                                                          | TMOD1_MOUSE       | 40 kDa  | 1 | 12 | 9           | 12 | 9  | 12 | 12 | 12 | 9  | 12 | 12 | 9  | 12 |
| Cluster of D-beta-hydroxybutyrate dehydrogenase, mitochondrial OS=Mus musculus GN=BDH_MOUSE [2]            | BDH_MOUSE [2]     | 38 kDa  | 1 | 8  | 10          | 10 | 10 | 8  | 10 | 10 | 10 | 8  | 10 | 10 | 8  |
| Creatine kinase B-type OS=Mus musculus GN=Ckb PE=1 SV=1                                                    | KCRB_MOUSE        | 43 kDa  | 1 | 7  | 6           | 8  | 6  | 7  | 8  | 8  | 6  | 7  | 8  | 6  | 7  |
| Chaperone activity of bc1 complex-like, mitochondrial OS=Mus musculus GN=Adck3 PADC3_MOUSE                 | PADC3_MOUSE       | 72 kDa  | 1 | 8  | 15          | 12 | 15 | 8  | 12 | 12 | 15 | 8  | 12 | 15 | 8  |
| Cluster of Protein Tns1 OS=Mus musculus GN=Tns1 PE=2 SV=1 (E9Q0S6_MOUSE)                                   | E9Q0S6_MOUSE      | 201 kDa | 1 | 11 | 12          | 14 | 12 | 11 | 14 | 14 | 12 | 11 | 14 | 12 | 11 |
| Striated muscle-specific serine/threonine-protein kinase OS=Mus musculus GN=Speg E9Q2S5_MOUSE              | E9Q2S5_MOUSE      | 354 kDa | 1 | 8  | 10          | 9  | 10 | 8  | 9  | 9  | 10 | 8  | 9  | 10 | 8  |
| 60S ribosomal protein L6 OS=Mus musculus GN=Rpl6 PE=1 SV=3                                                 | RL6_MOUSE         | 34 kDa  | 1 | 7  | 14          | 12 | 14 | 7  | 12 | 12 | 14 | 7  | 12 | 14 | 7  |
| Nesprin-2 OS=Mus musculus GN=Syne2 PE=1 SV=2                                                               | SYNE2_MOUSE       | 783 kDa | 1 | 3  | 0           | 0  | 3  | 0  | 0  | 0  | 3  | 0  | 0  | 3  | 0  |
| Cluster of Glutathione S-transferase omega-1 OS=Mus musculus GN=Gsto1 PE=2 SV=2 (GSTO1_MOUSE)              | GSTO1_MOUSE       | 27 kDa  | 1 | 7  | 9           | 12 | 9  | 7  | 12 | 12 | 9  | 7  | 12 | 9  | 7  |
| Cluster of Calpastatin OS=Mus musculus GN=Cast PE=1 SV=2 (ICAL_MOUSE)                                      | ICAL_MOUSE [3]    | 85 kDa  | 1 | 10 | 13          | 19 | 13 | 10 | 19 | 19 | 13 | 10 | 19 | 13 | 10 |
| Non-specific lipid-transfer protein OS=Mus musculus GN=Scp2 PE=1 SV=3                                      | NLTP_MOUSE        | 59 kDa  | 1 | 8  | 11          | 8  | 11 | 8  | 8  | 11 | 8  | 8  | 11 | 8  | 11 |
| Calcium-binding mitochondrial carrier protein Aralar2 OS=Mus musculus GN=Slc25a1; CMC2_MOUSE               | CMC2_MOUSE        | 74 kDa  | 1 | 13 | 11          | 10 | 11 | 13 | 10 | 10 | 11 | 13 | 10 | 11 | 13 |
| Cysteine-rich protein 2 OS=Mus musculus GN=Crip2 PE=1 SV=1                                                 | CRIP2_MOUSE       | 23 kDa  | 1 | 0  | 9           | 7  | 9  | 0  | 7  | 7  | 9  | 0  | 7  | 9  | 0  |
| Uncharacterized protein OS=Mus musculus GN=Rps3a2 PE=3 SV=1                                                | D3Z6C3_MOUSE      | 30 kDa  | 1 | 7  | 11          | 12 | 11 | 7  | 12 | 12 | 11 | 7  | 12 | 11 | 7  |
| Glutamate dehydrogenase 1, mitochondrial OS=Mus musculus GN=Glud1 PE=1 SV=1                                | DHE1_MOUSE        | 61 kDa  | 1 | 11 | 16          | 14 | 16 | 11 | 14 | 14 | 16 | 11 | 14 | 16 | 11 |
| Cluster of Catenin alpha-1 OS=Mus musculus GN=Cttna1 PE=1 SV=1 (CTNA1_MOUSE)                               | CTNA1_MOUSE       | 100 kDa | 1 | 8  | 11          | 9  | 11 | 8  | 9  | 9  | 11 | 8  | 9  | 11 | 8  |
| Nexilin OS=Mus musculus GN=Nexn PE=1 SV=3                                                                  | NEXN_MOUSE        | 72 kDa  | 1 | 10 | 14          | 12 | 14 | 10 | 12 | 12 | 14 | 10 | 12 | 14 | 10 |
| Cluster of Talin-2 OS=Mus musculus GN=Tln2 PE=4 SV=1 (E9PUM4_MOUSE)                                        | E9PUM4_MOUSE [2]  | 272 kDa | 1 | 8  | 10          | 9  | 10 | 8  | 9  | 9  | 10 | 8  | 9  | 10 | 8  |
| NADH dehydrogenase [ubiquinone] 1 alpha subcomplex subunit 13 OS=Mus musculus GN=Ndub13_MOUSE              | NDUB13_MOUSE      | 17 kDa  | 1 | 10 | 7           | 9  | 7  | 10 | 9  | 9  | 7  | 10 | 9  | 7  | 10 |
| Phosphoglucomutase-like protein 5 OS=Mus musculus GN=Pgm5 PE=1 SV=2                                        | PGM5_MOUSE        | 62 kDa  | 1 | 7  | 9           | 11 | 9  | 7  | 11 | 11 | 9  | 7  | 11 | 9  | 7  |
| Cluster of Dynamin-like 120 kDa protein, mitochondrial OS=Mus musculus GN=Opa1 F7Bx01_MOUSE [3]            | F7Bx01_MOUSE [3]  | 113 kDa | 1 | 16 | 14          | 17 | 14 | 16 | 17 | 17 | 14 | 16 | 17 | 14 | 16 |
| Heat shock protein HSP 90-alpha OS=Mus musculus GN=Hsp90aa1 PE=1 SV=4                                      | H90A_MOUSE        | 85 kDa  | 1 | 14 | 10          | 12 | 10 | 14 | 12 | 12 | 10 | 14 | 12 | 10 | 14 |
| Protein Agl OS=Mus musculus GN=Agl PE=4 SV=1                                                               | F8VPN4_MOUSE      | 174 kDa | 1 | 11 | 15          | 10 | 15 | 11 | 10 | 10 | 15 | 11 | 10 | 15 | 11 |
| Plasminogen activator inhibitor 1 RNA-binding protein OS=Mus musculus GN=Serbp1 PAIRB_MOUSE                | PAIRB_MOUSE       | 45 kDa  | 1 | 7  | 11          | 8  | 11 | 7  | 8  | 8  | 11 | 7  | 8  | 11 | 7  |
| Propionyl-CoA carboxylase beta chain, mitochondrial OS=Mus musculus GN=Pccb PE=PCCB_MOUSE                  | PCCB_MOUSE        | 58 kDa  | 1 | 11 | 11          | 15 | 11 | 11 | 15 | 15 | 11 | 11 | 15 | 11 | 11 |
| Laminin subunit beta-1 OS=Mus musculus GN=Lamb1 PE=2 SV=1                                                  | E9QN70_MOUSE      | 202 kDa | 1 | 9  | 8           | 10 | 8  | 9  | 10 | 10 | 8  | 9  | 10 | 8  | 9  |
| Lumican OS=Mus musculus GN=Lum PE=1 SV=2                                                                   | LUM_MOUSE         | 38 kDa  | 1 | 7  | 10          | 15 | 10 | 7  | 15 | 15 | 10 | 7  | 15 | 10 | 7  |
| Filamin, alpha OS=Mus musculus GN=Flna PE=4 SV=1                                                           | B7FAU9_MOUSE (+2) | 280 kDa | 1 | 10 | 18          | 12 | 18 | 10 | 12 | 12 | 18 | 10 | 12 | 18 | 10 |
| Cluster of MCG5732 OS=Mus musculus GN=Gm4978 PE=4 SV=2 (F6VBB8_MOUSE)                                      | F6VBB8_MOUSE [5]  | 30 kDa  | 1 | 3  | 9           | 9  | 9  | 3  | 9  | 9  | 9  | 3  | 9  | 9  | 3  |
| Acyl-coenzyme A thioesterase 13 OS=Mus musculus GN=Acot13 PE=1 SV=1                                        | ACOT13_MOUSE      | 15 kDa  | 1 | 6  | AC013_MOUSE | 7  | 6  | 6  | 7  | 7  | 6  | 6  | 7  | 6  | 6  |
| Cluster of 40S ribosomal protein S4, X isoform OS=Mus musculus GN=Rps4x PE=2 SV=1                          | R54X_MOUSE [3]    | 30 kDa  | 1 | 5  | 6           | 7  | 6  | 5  | 7  | 7  | 6  | 5  | 7  | 6  | 5  |
| Calmodulin OS=Mus musculus GN=Calm1 PE=1 SV=2                                                              | CALM_MOUSE (+1)   | 17 kDa  | 1 | 8  | 8           | 9  | 8  | 8  | 9  | 9  | 8  | 8  | 9  | 8  | 8  |
| Protein Fga OS=Mus musculus GN=Fga PE=2 SV=1                                                               | E9PV24_MOUSE (+1) | 87 kDa  | 1 | 8  | 12          | 12 | 12 | 8  | 12 | 12 | 12 | 8  | 12 | 12 | 8  |
| Protein Col6a3 OS=Mus musculus GN=Col6a3 PE=4 SV=2                                                         | E9PWQ3_MOUSE      | 354 kDa | 1 | 0  | 4           | 7  | 4  | 0  | 7  | 7  | 4  | 0  | 7  | 4  | 0  |
| Histone H1.0 OS=Mus musculus GN=H1f0 PE=2 SV=4                                                             | H10_MOUSE         | 21 kDa  | 1 | 7  | 5           | 7  | 5  | 7  | 7  | 7  | 5  | 7  | 5  | 7  | 5  |
| NADH dehydrogenase [ubiquinone] 1 beta subcomplex subunit 9 OS=Mus musculus GN=Ndub9_MOUSE                 | NDUB9_MOUSE       | 22 kDa  | 1 | 0  | 6           | 8  | 6  | 0  | 8  | 8  | 6  | 0  | 8  | 6  | 0  |
| Heat shock protein beta-6 OS=Mus musculus GN=Hspb6 PE=1 SV=1                                               | HSPB6_MOUSE       | 18 kDa  | 1 | 11 | 10          | 12 | 10 | 11 | 12 | 12 | 10 | 11 | 12 | 10 | 11 |
| Methylcrotonoyl-CoA carboxylase subunit alpha, mitochondrial OS=Mus musculus GN=MCCA_MOUSE                 | MCCA_MOUSE        | 79 kDa  | 1 | 9  | 11          | 17 | 11 | 9  | 17 | 17 | 11 | 9  | 17 | 11 | 9  |

|                                                                                                      |         |   |    |    |    |    |    |    |    |    |    |    |    |    |
|------------------------------------------------------------------------------------------------------|---------|---|----|----|----|----|----|----|----|----|----|----|----|----|
| NADH dehydrogenase [ubiquinone] iron-sulfur protein 5 OS=Mus musculus GN=Ndufs NDUS5_MOUSE           | 13 kDa  | 1 | 7  | 5  | 7  | 5  | 7  | 7  | 7  | 5  | 7  | 7  | 5  | 7  |
| ATP synthase subunit epsilon, mitochondrial OS=Mus musculus GN=Atp5e PE=2 SV=2 ATP5E_MOUSE           | 6 kDa   | 1 | 4  | 8  | 7  | 8  | 4  | 7  | 7  | 8  | 4  | 7  | 8  | 4  |
| Platelet glycoprotein 4 OS=Mus musculus GN=Cd36 PE=1 SV=2 CD36_MOUSE                                 | 53 kDa  | 1 | 6  | 5  | 5  | 5  | 6  | 5  | 5  | 5  | 6  | 5  | 5  | 6  |
| Ig kappa chain C region OS=Mus musculus PE=1 SV=1 IGKC_MOUSE                                         | 12 kDa  | 1 | 6  | 9  | 8  | 9  | 6  | 8  | 8  | 9  | 6  | 8  | 9  | 6  |
| Protein phosphatase 1 regulatory subunit 12B OS=Mus musculus GN=Ppp1r12b PE=1 MYPT2_MOUSE            | 109 kDa | 1 | 7  | 10 | 12 | 10 | 7  | 12 | 12 | 10 | 7  | 12 | 10 | 7  |
| Cluster of Protein Pabpc6 OS=Mus musculus GN=Pabpc6 PE=2 SV=1 (Q9D4E6_MOUSE Q9D4E6_MOUSE [4])        | 71 kDa  | 1 | 4  | 3  | 6  | 3  | 4  | 6  | 6  | 3  | 4  | 6  | 3  | 4  |
| Alpha-2-HS-glycoprotein OS=Mus musculus GN=Ahsfg PE=1 SV=1 FETUA_MOUSE                               | 37 kDa  | 1 | 8  | 9  | 11 | 9  | 8  | 11 | 11 | 9  | 8  | 11 | 9  | 8  |
| 3-hydroxyacyl-CoA dehydrogenase type-2 OS=Mus musculus GN=Hsd17b10 PE=2 SV=2 A2AFQ2_MOUSE (+1)       | 28 kDa  | 1 | 5  | 13 | 15 | 13 | 5  | 15 | 15 | 13 | 5  | 15 | 13 | 5  |
| Sodium/potassium-transporting ATPase subunit beta-1 OS=Mus musculus GN=Atp1b1AT1B1_MOUSE             | 35 kDa  | 1 | 5  | 8  | 8  | 5  | 8  | 8  | 8  | 5  | 8  | 8  | 5  | 8  |
| Cluster of Catalase OS=Mus musculus GN=Cat PE=1 SV=4 (CATA_MOUSE) CATA_MOUSE [2]                     | 60 kDa  | 1 | 11 | 20 | 10 | 20 | 11 | 10 | 10 | 20 | 11 | 10 | 20 | 11 |
| Cluster of Protein Gm10923 OS=Mus musculus GN=Gm10923 PE=3 SV=1 (D3YU46_M D3YU46_MOUSE [4])          | 17 kDa  | 1 | 8  | 9  | 10 | 9  | 8  | 10 | 10 | 9  | 8  | 10 | 9  | 8  |
| High mobility group protein B1 OS=Mus musculus GN=Hmgb1 PE=1 SV=2 HMGB1_MOUSE                        | 25 kDa  | 1 | 10 | 9  | 16 | 9  | 10 | 16 | 16 | 9  | 10 | 16 | 9  | 10 |
| Methylcrotonoyl-CoA carboxylase beta chain, mitochondrial OS=Mus musculus GN=MCCB_MOUSE              | 61 kDa  | 1 | 9  | 9  | 13 | 9  | 9  | 13 | 13 | 9  | 9  | 13 | 9  | 9  |
| Protein NDRG2 OS=Mus musculus GN=Ndrg2 PE=1 SV=1 NDRG2_MOUSE                                         | 41 kDa  | 1 | 0  | 5  | 8  | 5  | 0  | 8  | 8  | 5  | 0  | 8  | 5  | 0  |
| Cluster of NADH dehydrogenase [ubiquinone] 1 beta subcomplex subunit 5, mitochondrion NDU5_MOUSE [2] | 22 kDa  | 1 | 8  | 5  | 5  | 8  | 5  | 5  | 5  | 8  | 5  | 5  | 8  | 5  |
| ATPase inhibitor, mitochondrial OS=Mus musculus GN=Atpif1 PE=2 SV=1 E9PV44_MOUSE                     | 9 kDa   | 1 | 8  | 10 | 9  | 10 | 8  | 9  | 9  | 10 | 8  | 9  | 10 | 8  |
| Cluster of Hmg2 protein OS=Mus musculus GN=Hmg2 PE=4 SV=1 (Q5XK38_MOUSE Q5XK38_MOUSE [2])            | 10 kDa  | 1 | 6  | 0  | 0  | 0  | 6  | 0  | 0  | 0  | 6  | 0  | 0  | 6  |
| Cluster of Microtubule-associated protein tau OS=Mus musculus GN=Mapt PE=2 SV=1 A2A5Y6_MOUSE [4]     | 78 kDa  | 1 | 7  | 7  | 9  | 7  | 7  | 9  | 9  | 7  | 7  | 9  | 7  | 7  |
| Carbonic anhydrase 2 OS=Mus musculus GN=Ca2 PE=1 SV=4 CAH2_MOUSE                                     | 29 kDa  | 1 | 9  | 6  | 10 | 6  | 9  | 10 | 10 | 6  | 9  | 10 | 6  | 9  |
| Protein Golgb1 OS=Mus musculus GN=Golgb1 PE=2 SV=1 E9QAH1_MOUSE                                      | 365 kDa | 1 | 3  | 0  | 0  | 0  | 3  | 0  | 0  | 0  | 3  | 0  | 0  | 3  |
| Adenosine kinase OS=Mus musculus GN=Adk PE=1 SV=2 ADK_MOUSE (+1)                                     | 40 kDa  | 1 | 7  | 7  | 9  | 7  | 7  | 9  | 9  | 7  | 7  | 9  | 7  | 7  |
| Cluster of Uncharacterized protein OS=Mus musculus GN=Gm5611 PE=4 SV=2 (E9Q5T E9Q5T3_MOUSE [2])      | 30 kDa  | 1 | 5  | 4  | 7  | 4  | 5  | 7  | 7  | 4  | 5  | 7  | 4  | 5  |
| NADH dehydrogenase [ubiquinone] 1 alpha subcomplex subunit 5 OS=Mus musculus NDUA5_MOUSE             | 13 kDa  | 1 | 7  | 11 | 7  | 11 | 7  | 7  | 7  | 11 | 7  | 7  | 11 | 7  |
| Cluster of sp K1C9_HUMAN  sp K1C9_HUMAN  [2]                                                         | ?       | 1 | 6  | 13 | 9  | 13 | 6  | 9  | 9  | 13 | 6  | 9  | 13 | 6  |
| Natriuretic peptides A OS=Mus musculus GN=Nppa PE=1 SV=2 ANF_MOUSE                                   | 17 kDa  | 1 | 6  | 9  | 8  | 9  | 6  | 8  | 8  | 9  | 6  | 8  | 9  | 6  |
| Cluster of Antithrombin-III OS=Mus musculus GN=Serpinc1 PE=1 SV=1 (ANT3_MOUSE ANT3_MOUSE)            | 52 kDa  | 1 | 7  | 9  | 10 | 9  | 7  | 10 | 10 | 9  | 7  | 10 | 9  | 7  |
| ATP synthase subunit e, mitochondrial OS=Mus musculus GN=Atp5i PE=1 SV=2 ATP5I_MOUSE                 | 8 kDa   | 1 | 0  | 6  | 5  | 6  | 0  | 5  | 5  | 6  | 0  | 5  | 6  | 0  |
| 14 kDa phosphohistidine phosphatase OS=Mus musculus GN=Phpt1 PE=1 SV=1 PPH14_MOUSE                   | 14 kDa  | 1 | 9  | 10 | 7  | 10 | 9  | 7  | 7  | 10 | 9  | 7  | 10 | 9  |
| Transaldolase OS=Mus musculus GN=Taldo1 PE=1 SV=2 TALDO_MOUSE                                        | 37 kDa  | 1 | 6  | 7  | 12 | 7  | 6  | 12 | 12 | 7  | 6  | 12 | 7  | 6  |
| Cluster of Basigin OS=Mus musculus GN=Bsg PE=1 SV=2 (BASI_MOUSE) BASI_MOUSE [3]                      | 42 kDa  | 1 | 5  | 9  | 12 | 9  | 5  | 12 | 12 | 9  | 5  | 12 | 9  | 5  |
| Cluster of Kinetin OS=Mus musculus GN=Ktn1 PE=2 SV=1 (F8VQC7_MOUSE) F8VQC7_MOUSE [2]                 | 153 kDa | 1 | 6  | 4  | 8  | 4  | 6  | 8  | 8  | 4  | 6  | 8  | 4  | 6  |
| Proteasome activator complex subunit 1 (Fragment) OS=Mus musculus GN=Psm1 PE G3UXZ5_MOUSE (+1)       | 27 kDa  | 1 | 7  | 9  | 10 | 9  | 7  | 10 | 10 | 9  | 7  | 10 | 9  | 7  |
| 60S ribosomal protein L3 OS=Mus musculus GN=Rpl3 PE=2 SV=3 RL3_MOUSE                                 | 46 kDa  | 1 | 2  | 0  | 0  | 0  | 2  | 0  | 0  | 0  | 2  | 0  | 0  | 2  |
| Cluster of Heterogeneous nuclear ribonucleoprotein K OS=Mus musculus GN=Hnrnpk B2M1R6_MOUSE [4]      | 49 kDa  | 1 | 10 | 12 | 11 | 12 | 10 | 11 | 11 | 12 | 10 | 11 | 12 | 10 |
| Cofilin-1 OS=Mus musculus GN=Cf1 PE=1 SV=3 COF1_MOUSE (+1)                                           | 19 kDa  | 1 | 9  | 11 | 9  | 11 | 9  | 9  | 9  | 11 | 9  | 9  | 11 | 9  |
| DNA polymerase theta OS=Mus musculus GN=Polq PE=2 SV=1 Q80XB7_MOUSE                                  | 281 kDa | 1 | 3  | 0  | 0  | 0  | 3  | 0  | 0  | 0  | 3  | 0  | 0  | 3  |
| Cluster of Serine/threonine-protein phosphatase 2A 65 kDa regulatory subunit A alpha 2AAA_MOUSE      | 65 kDa  | 1 | 7  | 3  | 8  | 3  | 7  | 8  | 8  | 3  | 7  | 8  | 3  | 7  |
| Cluster of Methylglutaconyl-CoA hydratase, mitochondrial OS=Mus musculus GN=Auh AUHM_MOUSE [2]       | 33 kDa  | 1 | 5  | 10 | 8  | 10 | 5  | 8  | 8  | 10 | 5  | 8  | 10 | 5  |
| Cluster of CAP-Gly domain-containing linker protein 1 (Fragment) OS=Mus musculus CF7CB97_MOUSE [5]   | 136 kDa | 1 | 4  | 11 | 4  | 11 | 4  | 4  | 4  | 11 | 4  | 4  | 11 | 4  |
| Cluster of Cathepsin D OS=Mus musculus GN=Ctsd PE=1 SV=1 (CATD_MOUSE) CATD_MOUSE [2]                 | 45 kDa  | 1 | 5  | 9  | 11 | 9  | 5  | 11 | 11 | 9  | 5  | 11 | 9  | 5  |
| WD repeat-containing protein 1 OS=Mus musculus GN=Wdr1 PE=1 SV=3 WDR1_MOUSE                          | 66 kDa  | 1 | 9  | 9  | 9  | 9  | 9  | 9  | 9  | 9  | 9  | 9  | 9  | 9  |
| Serine-rich coiled-coil domain-containing protein 1 OS=Mus musculus GN=Ccser1 PE=1 CSSE1_MOUSE       | 98 kDa  | 1 | 3  | 0  | 0  | 3  | 0  | 0  | 0  | 3  | 0  | 0  | 3  | 0  |
| Dextrin OS=Mus musculus GN=Dstn PE=1 SV=3 DEST_MOUSE                                                 | 19 kDa  | 1 | 5  | 5  | 8  | 5  | 5  | 8  | 8  | 5  | 5  | 8  | 5  | 5  |
| Fibrous sheath-interacting protein 2 OS=Mus musculus GN=Fisp2 PE=1 SV=3 FISP2_MOUSE                  | 785 kDa | 1 | 4  | 0  | 0  | 0  | 4  | 0  | 0  | 0  | 4  | 0  | 0  | 4  |
| GrpE protein homolog 1, mitochondrial OS=Mus musculus GN=Grpel1 PE=1 SV=1 GRPE1_MOUSE                | 24 kDa  | 1 | 8  | 9  | 6  | 9  | 8  | 6  | 6  | 9  | 8  | 6  | 9  | 8  |
| O-acetyl-ADP-ribose deacetylase MACROD1 OS=Mus musculus GN=Macro1 PE=2 SV=1 MACD1_MOUSE              | 35 kDa  | 1 | 5  | 9  | 6  | 9  | 5  | 6  | 6  | 9  | 5  | 6  | 9  | 5  |
| Isoleucine-tRNA ligase, mitochondrial OS=Mus musculus GN=lars2 PE=2 SV=1 SYIN_MOUSE                  | 113 kDa | 1 | 4  | 9  | 12 | 9  | 4  | 12 | 12 | 9  | 4  | 12 | 9  | 4  |
| Beta-taxilin OS=Mus musculus GN=Txlnb PE=2 SV=2 TXLNB_MOUSE                                          | 77 kDa  | 1 | 6  | 10 | 10 | 10 | 6  | 10 | 10 | 10 | 6  | 10 | 10 | 6  |
| AFG3-like protein 2 OS=Mus musculus GN=Afg3l2 PE=1 SV=1 AFG32_MOUSE                                  | 90 kDa  | 1 | 6  | 10 | 10 | 10 | 6  | 10 | 10 | 10 | 6  | 10 | 10 | 6  |
| Cluster of MCG142036 OS=Mus musculus GN=Acad12 PE=3 SV=1 (D327X0_MOUSE) D327X0_MOUSE [2]             | 61 kDa  | 1 | 6  | 11 | 12 | 11 | 6  | 12 | 12 | 11 | 6  | 12 | 11 | 6  |
| Dynamin-1-like protein OS=Mus musculus GN=Dnm1l PE=1 SV=2 DNM1L_MOUSE (+1)                           | 83 kDa  | 1 | 0  | 10 | 8  | 10 | 0  | 8  | 8  | 10 | 0  | 8  | 10 | 0  |
| Cluster of Uncharacterized protein OS=Mus musculus GN=Gm18025 PE=3 SV=2 (E9Q1 E9Q1N8_MOUSE [5])      | 29 kDa  | 1 | 0  | 5  | 8  | 5  | 0  | 8  | 8  | 5  | 0  | 8  | 5  | 0  |
| Protein Myh15 OS=Mus musculus GN=Myh15 PE=4 SV=1 EQQ264_MOUSE                                        | 222 kDa | 1 | 3  | 1  | 2  | 1  | 3  | 2  | 2  | 1  | 3  | 2  | 1  | 3  |
| Cluster of Gelsolin OS=Mus musculus GN=Gsn PE=1 SV=3 (GELS_MOUSE) GELS_MOUSE                         | 86 kDa  | 1 | 6  | 9  | 8  | 9  | 6  | 8  | 8  | 9  | 6  | 8  | 9  | 6  |
| Cluster of Glutathione S-transferase A4 OS=Mus musculus GN=Gsta4 PE=1 SV=3 (GST7 GSTA4_MOUSE [3])    | 26 kDa  | 1 | 5  | 9  | 7  | 9  | 5  | 7  | 7  | 9  | 5  | 7  | 9  | 5  |
| Hydroxysteroid dehydrogenase-like protein 2 OS=Mus musculus GN=Hsd12 PE=2 SV=1 HSDL2_MOUSE           | 54 kDa  | 1 | 8  | 13 | 10 | 13 | 8  | 10 | 10 | 13 | 8  | 10 | 13 | 8  |
| Adenylate kinase 2, mitochondrial OS=Mus musculus GN=Ak2 PE=1 SV=5 KAD2_MOUSE                        | 26 kDa  | 1 | 9  | 6  | 5  | 6  | 9  | 5  | 5  | 6  | 9  | 5  | 6  | 9  |
| Ubiquitin-conjugating enzyme E2 N OS=Mus musculus GN=Ube2n PE=1 SV=1 UBE2N_MOUSE                     | 17 kDa  | 1 | 5  | 7  | 7  | 7  | 5  | 7  | 7  | 7  | 5  | 7  | 7  | 5  |
| Lactoylglutathione lyase OS=Mus musculus GN=Glo1 PE=1 SV=3 LGLU_MOUSE                                | 21 kDa  | 1 | 6  | 6  | 9  | 6  | 6  | 9  | 9  | 6  | 6  | 9  | 6  | 6  |
| NADH dehydrogenase [ubiquinone] 1 beta subcomplex subunit 7 OS=Mus musculus GNDUB7_MOUSE             | 16 kDa  | 1 | 3  | 5  | 6  | 5  | 3  | 6  | 6  | 5  | 3  | 6  | 5  | 3  |
| Cluster of Mitogen-activated protein kinase 12 OS=Mus musculus GN=Mapk12 PE=1 SV=1 SMK12_MOUSE [2]   | 42 kDa  | 1 | 2  | 0  | 0  | 0  | 2  | 0  | 0  | 0  | 2  | 0  | 0  | 2  |
| Aspartyl/asparaginyl beta-hydroxylase OS=Mus musculus GN=Asph PE=2 SV=1 A2AL78_MOUSE                 | 26 kDa  | 1 | 0  | 6  | 6  | 6  | 0  | 6  | 6  | 6  | 0  | 6  | 6  | 0  |
| Band 3 anion transport protein OS=Mus musculus GN=Slc4a1 PE=1 SV=1 B3AT_MOUSE (+1)                   | 103 kDa | 1 | 4  | 6  | 7  | 6  | 4  | 7  | 7  | 6  | 4  | 7  | 6  | 4  |
| CDGSH iron-sulfur domain-containing protein 1 OS=Mus musculus GN=Cisd1 PE=1 SV=1 CISD1_MOUSE         | 12 kDa  | 1 | 7  | 7  | 0  | 7  | 7  | 0  | 0  | 7  | 7  | 0  | 7  | 7  |
| Band 4.1-like protein 2 OS=Mus musculus GN=Epb41l2 PE=1 SV=2 E41L2_MOUSE                             | 110 kDa | 1 | 2  | 5  | 2  | 5  | 2  | 2  | 2  | 5  | 2  | 2  | 5  | 2  |
| Cluster of Protein Cald1 OS=Mus musculus GN=Cald1 PE=2 SV=1 (E9QA15_MOUSE) E9QA15_MOUSE [2]          | 89 kDa  | 1 | 5  | 8  | 5  | 8  | 5  | 5  | 5  | 8  | 5  | 5  | 8  | 5  |

|                                                                                                      |         |   |    |    |    |    |    |    |    |    |    |    |    |    |
|------------------------------------------------------------------------------------------------------|---------|---|----|----|----|----|----|----|----|----|----|----|----|----|
| Eukaryotic translation initiation factor 3 subunit A OS=Mus musculus GN=Eif3a PE=1 S EIF3A_MOUSE     | 162 kDa | 1 | 5  | 12 | 8  | 12 | 5  | 8  | 8  | 12 | 5  | 8  | 12 | 5  |
| Cluster of Kinesin-1 heavy chain OS=Mus musculus GN=Kif5b PE=1 SV=3 (KINH_MOUSE KINH_MOUSE)          | 110 kDa | 1 | 0  | 4  | 4  | 4  | 0  | 4  | 4  | 4  | 0  | 4  | 4  | 0  |
| Spectrin beta 1 OS=Mus musculus GN=Sptb PE=2 SV=1                                                    | 268 kDa | 1 | 7  | 9  | 8  | 9  | 7  | 8  | 8  | 9  | 7  | 8  | 9  | 7  |
| Cluster of Thioredoxin OS=Mus musculus GN=Txn PE=1 SV=3 (THIO_MOUSE)                                 | 12 kDa  | 1 | 5  | 7  | 5  | 7  | 5  | 5  | 5  | 7  | 5  | 7  | 5  | 7  |
| Cluster of Acidic leucine-rich nuclear phosphoprotein 32 family member A OS=Mus m AN32A_MOUSE [3]    | 29 kDa  | 1 | 6  | 8  | 11 | 8  | 6  | 11 | 11 | 8  | 6  | 11 | 8  | 6  |
| Branched-chain-amino-acid aminotransferase, mitochondrial OS=Mus musculus GN=EBCAT2_MOUSE            | 44 kDa  | 1 | 7  | 7  | 8  | 7  | 7  | 8  | 8  | 7  | 7  | 8  | 7  | 7  |
| Xin actin-binding repeat-containing protein 1 OS=Mus musculus GN=Xirp1 PE=4 SV=1                     | 124 kDa | 1 | 5  | 11 | 12 | 11 | 5  | 12 | 12 | 11 | 5  | 12 | 11 | 5  |
| Protein unc-45 homolog B OS=Mus musculus GN=Unc45b PE=1 SV=1                                         | 104 kDa | 1 | 4  | 9  | 13 | 9  | 4  | 13 | 13 | 9  | 4  | 13 | 9  | 4  |
| Vigilin OS=Mus musculus GN=Hdlbp PE=1 SV=1                                                           | 142 kDa | 1 | 3  | 0  | 3  | 0  | 3  | 3  | 3  | 0  | 3  | 3  | 0  | 3  |
| Isocitrate dehydrogenase [NADP] cytoplasmic OS=Mus musculus GN=ldh1 PE=1 SV=2                        | 47 kDa  | 1 | 8  | 9  | 6  | 9  | 8  | 6  | 6  | 9  | 8  | 6  | 9  | 8  |
| LETM1 and EF-hand domain-containing protein 1, mitochondrial OS=Mus musculus GI LETM1_MOUSE          | 83 kDa  | 1 | 4  | 10 | 9  | 10 | 4  | 9  | 9  | 10 | 4  | 9  | 10 | 4  |
| NADH dehydrogenase [ubiquinone] iron-sulfur protein 7, mitochondrial OS=Mus mus NDUS7_MOUSE          | 25 kDa  | 1 | 4  | 8  | 7  | 8  | 4  | 7  | 7  | 8  | 4  | 7  | 8  | 4  |
| Ornithine aminotransferase, mitochondrial OS=Mus musculus GN=Oat PE=1 SV=1                           | 48 kDa  | 1 | 4  | 7  | 8  | 7  | 4  | 8  | 8  | 7  | 4  | 8  | 7  | 4  |
| Cluster of 40S ribosomal protein S9 OS=Mus musculus GN=Rps9 PE=2 SV=3 (RS9_MOUSE RS9_MOUSE [4])      | 23 kDa  | 1 | 6  | 9  | 10 | 9  | 6  | 10 | 10 | 9  | 6  | 10 | 9  | 6  |
| Succinate-semialdehyde dehydrogenase, mitochondrial OS=Mus musculus GN=Aldh5:SSDH_MOUSE              | 56 kDa  | 1 | 6  | 10 | 11 | 10 | 6  | 11 | 11 | 10 | 6  | 11 | 10 | 6  |
| Acylphosphatase-2 OS=Mus musculus GN=Acp2 PE=2 SV=2                                                  | 12 kDa  | 1 | 4  | 6  | 7  | 6  | 4  | 7  | 7  | 6  | 4  | 7  | 6  | 4  |
| Cluster of Caveolin-3 OS=Mus musculus GN=Cav3 PE=1 SV=1 (CAV3_MOUSE)                                 | 17 kDa  | 1 | 5  | 10 | 9  | 10 | 5  | 9  | 9  | 10 | 5  | 9  | 10 | 5  |
| Dnaj homolog subfamily A member 2 OS=Mus musculus GN=Dnaja2 PE=1 SV=1                                | 46 kDa  | 1 | 8  | 9  | 10 | 9  | 8  | 10 | 10 | 9  | 8  | 10 | 9  | 8  |
| Myosin-14 OS=Mus musculus GN=Myl14 PE=4 SV=1                                                         | 229 kDa | 1 | 7  | 4  | 6  | 4  | 7  | 6  | 6  | 4  | 7  | 6  | 4  | 7  |
| Amine oxidase [flavin-containing] B OS=Mus musculus GN=Maob PE=1 SV=4                                | 59 kDa  | 1 | 5  | 7  | 4  | 7  | 5  | 4  | 4  | 7  | 5  | 4  | 7  | 5  |
| Protein Lmo7 OS=Mus musculus GN=Lmo7 PE=2 SV=1                                                       | 193 kDa | 1 | 4  | 8  | 7  | 8  | 4  | 7  | 7  | 8  | 4  | 7  | 8  | 4  |
| Fibrinogen beta chain OS=Mus musculus GN=Fgb PE=2 SV=1                                               | 55 kDa  | 1 | 7  | 8  | 9  | 8  | 7  | 9  | 9  | 8  | 7  | 9  | 8  | 7  |
| Glutathione S-transferase P 1 OS=Mus musculus GN=Gstp1 PE=1 SV=2                                     | 24 kDa  | 1 | 3  | 7  | 7  | 7  | 3  | 7  | 7  | 7  | 3  | 7  | 7  | 3  |
| Puromycin-sensitive aminopeptidase OS=Mus musculus GN=Npepps PE=1 SV=2                               | 103 kDa | 1 | 5  | 3  | 4  | 3  | 5  | 4  | 4  | 3  | 5  | 4  | 3  | 5  |
| Regulator of microtubule dynamics protein 1 OS=Mus musculus GN=Rmdn1 PE=2 SV=                        | 35 kDa  | 1 | 5  | 9  | 8  | 9  | 5  | 8  | 8  | 9  | 5  | 8  | 9  | 5  |
| Dihydropyrimidinase-related protein 2 OS=Mus musculus GN=Dpysl2 PE=1 SV=2                            | 62 kDa  | 1 | 4  | 7  | 7  | 7  | 4  | 7  | 7  | 7  | 4  | 7  | 7  | 4  |
| Cluster of Ceruloplasmin OS=Mus musculus GN=Cp PE=4 SV=1 (G3X8Q5_MOUSE)                              | 124 kDa | 1 | 6  | 7  | 7  | 7  | 6  | 7  | 7  | 7  | 6  | 7  | 7  | 6  |
| Glutathione S-transferase kappa 1 OS=Mus musculus GN=Gstk1 PE=1 SV=3                                 | 26 kDa  | 1 | 5  | 7  | 7  | 7  | 5  | 7  | 7  | 7  | 5  | 7  | 7  | 5  |
| Cluster of Sarcolemmal membrane-associated protein OS=Mus musculus GN=Slmap P H7BX64_MOUSE [3]       | 95 kDa  | 1 | 5  | 9  | 6  | 9  | 5  | 6  | 6  | 9  | 5  | 6  | 9  | 5  |
| Mitochondrial carnitine/acylcarnitine carrier protein OS=Mus musculus GN=Slc25a20 MCAT_MOUSE         | 33 kDa  | 1 | 7  | 7  | 7  | 7  | 7  | 7  | 7  | 7  | 7  | 7  | 7  | 7  |
| Methylmalonyl-CoA mutase, mitochondrial OS=Mus musculus GN=Mut PE=2 SV=2                             | 83 kDa  | 1 | 8  | 0  | 6  | 0  | 8  | 6  | 6  | 0  | 8  | 6  | 0  | 8  |
| Proteasome subunit alpha type-1 OS=Mus musculus GN=Psm1 PE=1 SV=1                                    | 30 kDa  | 1 | 3  | 9  | 7  | 9  | 3  | 7  | 7  | 9  | 3  | 7  | 9  | 3  |
| Spectrin alpha chain, erythrocytic 1 OS=Mus musculus GN=Spta1 PE=2 SV=3                              | 280 kDa | 1 | 6  | 8  | 5  | 8  | 6  | 5  | 5  | 8  | 6  | 5  | 8  | 6  |
| Short/branched chain specific acyl-CoA dehydrogenase, mitochondrial OS=Mus musc ACDSB_MOUSE          | 48 kDa  | 1 | 0  | 7  | 6  | 7  | 0  | 6  | 6  | 7  | 0  | 6  | 7  | 0  |
| Apolipoprotein A-IV OS=Mus musculus GN=Apoa4 PE=2 SV=3                                               | 45 kDa  | 1 | 5  | 5  | 10 | 5  | 5  | 10 | 10 | 5  | 5  | 10 | 5  | 5  |
| Cluster of F-actin-capping protein subunit beta OS=Mus musculus GN=Capzb PE=1 SV:CAPZB_MOUSE [2]     | 31 kDa  | 1 | 7  | 8  | 11 | 8  | 7  | 11 | 11 | 8  | 7  | 11 | 8  | 7  |
| Cofilin-2 OS=Mus musculus GN=Cfl2 PE=1 SV=1                                                          | 19 kDa  | 1 | 11 | 6  | 4  | 6  | 11 | 4  | 4  | 6  | 11 | 4  | 6  | 11 |
| Phospholipid hydroperoxide glutathione peroxidase, nuclear OS=Mus musculus GN=GPX42_MOUSE (+1)       | 29 kDa  | 1 | 0  | 8  | 7  | 8  | 0  | 7  | 7  | 8  | 0  | 7  | 8  | 0  |
| Decorin OS=Mus musculus GN=Dcn PE=2 SV=1                                                             | 40 kDa  | 1 | 8  | 10 | 10 | 10 | 8  | 10 | 10 | 10 | 8  | 10 | 10 | 8  |
| Ryanodine receptor 3 OS=Mus musculus GN=Ryr3 PE=1 SV=1                                               | 551 kDa | 1 | 2  | 0  | 0  | 0  | 2  | 0  | 0  | 0  | 2  | 0  | 0  | 2  |
| Tropomyosin alpha-4 chain OS=Mus musculus GN=Tpm4 PE=2 SV=3                                          | 28 kDa  | 1 | 9  | 5  | 8  | 5  | 9  | 8  | 8  | 5  | 9  | 8  | 5  | 9  |
| LIM and calponin homology domains-containing protein 1 OS=Mus musculus GN=Lim1 D3YU22_MOUSE (+1)     | 120 kDa | 1 | 0  | 4  | 0  | 0  | 4  | 0  | 4  | 0  | 4  | 0  | 0  | 4  |
| Cluster of Synaptopodin-2 OS=Mus musculus GN=Synpo2 PE=2 SV=1 (E9Q1U2_MOUSE E9Q1U2_MOUSE [2])        | 136 kDa | 1 | 0  | 5  | 6  | 5  | 0  | 6  | 6  | 5  | 0  | 6  | 5  | 0  |
| Ferrochelatase, mitochondrial OS=Mus musculus GN=Fech PE=1 SV=2                                      | 47 kDa  | 1 | 4  | 9  | 7  | 9  | 4  | 7  | 7  | 9  | 4  | 7  | 9  | 4  |
| Histidine triad nucleotide-binding protein 2, mitochondrial OS=Mus musculus GN=Hin HINT2_MOUSE       | 17 kDa  | 1 | 7  | 6  | 6  | 6  | 7  | 6  | 6  | 6  | 7  | 6  | 6  | 7  |
| Heterochromatin protein 1-binding protein 3 OS=Mus musculus GN=Hp1bp3 PE=1 SV:HP1B3_MOUSE            | 61 kDa  | 1 | 3  | 0  | 0  | 0  | 3  | 0  | 0  | 0  | 3  | 0  | 0  | 3  |
| Adenylosuccinate synthetase OS=Mus musculus GN=Adssl1 PE=3 SV=1                                      | 53 kDa  | 1 | 8  | 7  | 8  | 7  | 8  | 8  | 8  | 7  | 8  | 8  | 7  | 8  |
| NADH dehydrogenase [ubiquinone] 1 beta subcomplex subunit 4 OS=Mus musculus GN=NDUB4_MOUSE           | 15 kDa  | 1 | 5  | 0  | 6  | 0  | 5  | 6  | 6  | 0  | 5  | 6  | 0  | 5  |
| Cluster of 26S proteasome non-ATPase regulatory subunit 2 OS=Mus musculus GN=Ps PSDM2_MOUSE [2]      | 100 kDa | 1 | 6  | 11 | 8  | 11 | 6  | 8  | 8  | 11 | 6  | 8  | 11 | 6  |
| Ig mu chain C region secreted form OS=Mus musculus GN=Igh-6 PE=1 SV=2                                | 50 kDa  | 1 | 0  | 7  | 8  | 7  | 0  | 8  | 8  | 7  | 0  | 8  | 7  | 0  |
| Sulfated glycoprotein 1 OS=Mus musculus GN=Psap PE=4 SV=1                                            | 61 kDa  | 1 | 4  | 8  | 10 | 8  | 4  | 10 | 10 | 8  | 4  | 10 | 8  | 4  |
| Lipoamide acyltransferase component of branched-chain alpha-keto acid dehydrogenase ODB2_MOUSE       | 53 kDa  | 1 | 9  | 8  | 5  | 8  | 9  | 5  | 5  | 8  | 9  | 5  | 8  | 9  |
| Cluster of Elongation factor 1-delta (Fragment) OS=Mus musculus GN=Eef1d PE=2 SV: E9QN08_MOUSE [3]   | 27 kDa  | 1 | 5  | 7  | 5  | 7  | 5  | 5  | 5  | 7  | 5  | 5  | 7  | 5  |
| Nicotinamide phosphoribosyltransferase OS=Mus musculus GN=Nampt PE=1 SV=1                            | 55 kDa  | 1 | 0  | 8  | 8  | 8  | 0  | 8  | 8  | 8  | 0  | 8  | 8  | 0  |
| Cluster of Palmelphin OS=Mus musculus GN=Palmd PE=2 SV=1 (Q3UVT7_MOUSE)                              | 63 kDa  | 1 | 3  | 8  | 4  | 8  | 3  | 4  | 4  | 8  | 3  | 4  | 8  | 3  |
| T-complex protein 1 subunit epsilon OS=Mus musculus GN=Cct5 PE=1 SV=1                                | 60 kDa  | 1 | 6  | 3  | 8  | 3  | 6  | 8  | 8  | 3  | 6  | 8  | 3  | 6  |
| Cluster of MCG130675 OS=Mus musculus GN=2410018M08Rik PE=2 SV=1 (B2RPU8_MOUSE B2RPU8_MOUSE [2])      | 84 kDa  | 1 | 0  | 6  | 5  | 6  | 0  | 5  | 5  | 6  | 0  | 5  | 6  | 0  |
| Cluster of Nuclease-sensitive element-binding protein 1 (Fragment) OS=Mus musculus: A2BGG7_MOUSE [2] | 25 kDa  | 1 | 0  | 10 | 14 | 10 | 0  | 14 | 14 | 10 | 0  | 14 | 10 | 0  |
| ADP/ATP translocase 4 OS=Mus musculus GN=Slc25a31 PE=2 SV=1                                          | 35 kDa  | 1 | 1  | 1  | 1  | 1  | 1  | 1  | 1  | 1  | 1  | 1  | 1  | 1  |
| Cadherin-13 OS=Mus musculus GN=Cdh13 PE=1 SV=2                                                       | 78 kDa  | 1 | 3  | 7  | 6  | 7  | 3  | 6  | 6  | 7  | 3  | 6  | 7  | 3  |
| Calnexin OS=Mus musculus GN=Canx PE=1 SV=1                                                           | 67 kDa  | 1 | 4  | 8  | 6  | 8  | 4  | 6  | 6  | 8  | 4  | 6  | 8  | 4  |
| Fibrinogen gamma chain OS=Mus musculus GN=Fgg PE=2 SV=1                                              | 49 kDa  | 1 | 5  | 5  | 8  | 5  | 5  | 8  | 8  | 5  | 5  | 8  | 5  | 5  |
| Fibronectin OS=Mus musculus GN=Fn1 PE=1 SV=4                                                         | 273 kDa | 1 | 3  | 11 | 7  | 11 | 3  | 7  | 7  | 11 | 3  | 7  | 11 | 3  |
| Cluster of cAMP-dependent protein kinase catalytic subunit alpha OS=Mus musculus (KAPCA_MOUSE [2])   | 41 kDa  | 1 | 6  | 8  | 9  | 8  | 6  | 9  | 9  | 8  | 6  | 9  | 8  | 6  |
| Cluster of 60S ribosomal protein L24 OS=Mus musculus GN=Rpl24 PE=2 SV=2 (RL24_MOUSE RL24_MOUSE)      | 18 kDa  | 1 | 3  | 0  | 0  | 0  | 3  | 0  | 0  | 0  | 3  | 0  | 0  | 3  |
| 40S ribosomal protein S6 OS=Mus musculus GN=Rps6 PE=1 SV=1                                           | 29 kDa  | 1 | 3  | 7  | 7  | 7  | 3  | 7  | 7  | 7  | 3  | 7  | 7  | 3  |

|                                                                                                              |                        |         |   |    |    |   |    |    |   |   |    |    |   |    |    |
|--------------------------------------------------------------------------------------------------------------|------------------------|---------|---|----|----|---|----|----|---|---|----|----|---|----|----|
| Transferrin OS=Mus musculus GN=Ttr PE=1 SV=1                                                                 | TTHY_MOUSE             | 16 kDa  | 1 | 5  | 5  | 7 | 5  | 5  | 7 | 7 | 5  | 5  | 7 | 5  | 5  |
| Cluster of Archvillin OS=Mus musculus GN=Svil PE=2 SV=1 (Q8K4L2_MOUSE)                                       | Q8K4L2_MOUSE           | 227 kDa | 1 | 0  | 0  | 3 | 0  | 0  | 3 | 3 | 0  | 0  | 3 | 0  | 0  |
| Cullin-associated NEDD8-dissociated protein 2 OS=Mus musculus GN=Cand2 PE=1 SV=CAND2_MOUSE                   | CAND2_MOUSE            | 136 kDa | 1 | 0  | 10 | 7 | 10 | 0  | 7 | 7 | 10 | 0  | 7 | 10 | 0  |
| Histone-lysine N-methyltransferase, H3 lysine-36 and H4 lysine-20-specific OS=Mus mE9QAE4_MOUSE              | E9QAE4_MOUSE           | 296 kDa | 1 | 3  | 0  | 0 | 0  | 3  | 0 | 0 | 0  | 3  | 0 | 0  | 3  |
| Receptor accessory protein 5, isoform CRA_a OS=Mus musculus GN=Reep5 PE=4 SV=1G3X8R0_MOUSE                   | G3X8R0_MOUSE           | 21 kDa  | 1 | 6  | 7  | 8 | 7  | 6  | 8 | 8 | 7  | 6  | 8 | 7  | 6  |
| Laminin subunit beta-2 OS=Mus musculus GN=Lamb2 PE=2 SV=2                                                    | LAMB2_MOUSE            | 197 kDa | 1 | 6  | 5  | 7 | 5  | 6  | 7 | 7 | 5  | 6  | 7 | 5  | 6  |
| NADH dehydrogenase (ubiquinone) 1 beta subcomplex subunit 11, mitochondrial OS=NDUBB_MOUSE                   | NDUBB_MOUSE            | 17 kDa  | 1 | 4  | 0  | 0 | 0  | 4  | 0 | 0 | 0  | 4  | 0 | 0  | 4  |
| Vitamin D-binding protein OS=Mus musculus GN=Gc PE=1 SV=2                                                    | VTDB_MOUSE             | 54 kDa  | 1 | 6  | 7  | 5 | 7  | 6  | 5 | 5 | 7  | 6  | 5 | 7  | 6  |
| Isoform 2 of Dynamin-1 OS=Mus musculus GN=Dnm1                                                               | sp P39053-2 DYN1_MOUSE | 51 kDa  | 1 | 3  | 0  | 0 | 0  | 3  | 0 | 0 | 0  | 3  | 0 | 0  | 3  |
| Probable C->U-editing enzyme APOBEC-2 OS=Mus musculus GN=Apobec2 PE=1 SV=1 ABEC2_MOUSE                       | ABEC2_MOUSE            | 26 kDa  | 1 | 0  | 3  | 0 | 3  | 0  | 0 | 0 | 3  | 0  | 0 | 3  | 0  |
| Cluster of Acyl-coenzyme A thioesterase 9, mitochondrial OS=Mus musculus GN=Acot ACOT9_MOUSE [2]             | ACOT9_MOUSE [2]        | 51 kDa  | 1 | 3  | 3  | 5 | 3  | 3  | 5 | 5 | 3  | 3  | 5 | 3  | 3  |
| Cluster of ATPase family AAA domain-containing protein 3 OS=Mus musculus GN=Ata ATAD3_MOUSE                  | ATAD3_MOUSE            | 67 kDa  | 1 | 4  | 5  | 4 | 5  | 4  | 4 | 4 | 5  | 4  | 4 | 5  | 4  |
| Elongation factor 1-alpha 1 OS=Mus musculus GN=Eef1a1 PE=1 SV=3                                              | E1A1_MOUSE             | 50 kDa  | 1 | 2  | 5  | 8 | 5  | 2  | 8 | 8 | 5  | 2  | 8 | 5  | 2  |
| Acylpyruvate FAHD1, mitochondrial OS=Mus musculus GN=Fahd1 PE=1 SV=2                                         | FAHD1_MOUSE            | 25 kDa  | 1 | 3  | 7  | 4 | 7  | 3  | 4 | 4 | 7  | 3  | 4 | 7  | 3  |
| Ferritin heavy chain OS=Mus musculus GN=Fth1 PE=1 SV=2                                                       | FTH1_MOUSE             | 21 kDa  | 1 | 4  | 8  | 8 | 8  | 4  | 8 | 8 | 8  | 4  | 8 | 8  | 4  |
| Cluster of Eukaryotic initiation factor 4A-II OS=Mus musculus GN=Eif4a2 PE=2 SV=2 (EIF4A2_MOUSE [2])         | EIF4A2_MOUSE [2]       | 46 kDa  | 1 | 7  | 8  | 6 | 8  | 7  | 6 | 6 | 8  | 7  | 6 | 8  | 7  |
| Eukaryotic translation initiation factor 4B OS=Mus musculus GN=Eif4b PE=1 SV=1                               | IF4B_MOUSE             | 69 kDa  | 1 | 0  | 9  | 7 | 9  | 0  | 7 | 7 | 9  | 0  | 7 | 9  | 0  |
| Adenylosuccinate lyase OS=Mus musculus GN=Adsl PE=2 SV=2                                                     | PUR8_MOUSE             | 55 kDa  | 1 | 4  | 5  | 3 | 5  | 4  | 3 | 3 | 5  | 4  | 3 | 5  | 4  |
| Peripherin OS=Mus musculus GN=Prph PE=1 SV=2                                                                 | PERI_MOUSE (+1)        | 54 kDa  | 1 | 1  | 0  | 1 | 0  | 1  | 1 | 1 | 0  | 1  | 1 | 0  | 1  |
| [Protein ADP-ribosylarginine] hydrolase-like protein 1 OS=Mus musculus GN=Adprhl1 ARHL1_MOUSE                | ARHL1_MOUSE            | 40 kDa  | 1 | 7  | 7  | 7 | 7  | 7  | 7 | 7 | 7  | 7  | 7 | 7  | 7  |
| Actin-related protein 2/3 complex subunit 4 OS=Mus musculus GN=Arpc4 PE=1 SV=3                               | ARPC4_MOUSE            | 20 kDa  | 1 | 3  | 3  | 4 | 3  | 3  | 4 | 4 | 3  | 3  | 4 | 3  | 3  |
| Transcription elongation factor B polypeptide 2 OS=Mus musculus GN=Tceb2 PE=1 SV ELOB_MOUSE                  | ELOB_MOUSE             | 13 kDa  | 1 | 6  | 5  | 5 | 5  | 6  | 5 | 5 | 5  | 5  | 6 | 5  | 6  |
| Serine/arginine-rich-splicing factor 1 OS=Mus musculus GN=Srsf1 PE=2 SV=1                                    | H7BX95_MOUSE (+1)      | 28 kDa  | 1 | 8  | 4  | 7 | 4  | 8  | 7 | 7 | 4  | 8  | 7 | 4  | 8  |
| Laminin subunit alpha-4 OS=Mus musculus GN=Lama4 PE=1 SV=2                                                   | LAMAA_MOUSE            | 202 kDa | 1 | 3  | 5  | 3 | 5  | 3  | 3 | 3 | 5  | 3  | 3 | 5  | 3  |
| Mitochondrial fission process protein 1 OS=Mus musculus GN=Mtfp1 PE=1 SV=1                                   | MTFP1_MOUSE            | 18 kDa  | 1 | 3  | 0  | 3 | 0  | 3  | 3 | 3 | 0  | 3  | 3 | 0  | 3  |
| Prostaglandin reductase 2 OS=Mus musculus GN=Ptgr2 PE=1 SV=2                                                 | PTGR2_MOUSE            | 38 kDa  | 1 | 6  | 8  | 7 | 8  | 6  | 7 | 7 | 8  | 6  | 7 | 8  | 6  |
| Protein Sf3b2 OS=Mus musculus GN=Sf3b2 PE=2 SV=1                                                             | Q3UJB0_MOUSE           | 98 kDa  | 1 | 0  | 4  | 4 | 4  | 0  | 4 | 4 | 4  | 0  | 4 | 4  | 0  |
| 40S ribosomal protein S12 OS=Mus musculus GN=Rps12 PE=2 SV=1                                                 | Q6ZWZ6_MOUSE           | 15 kDa  | 1 | 5  | 4  | 3 | 4  | 5  | 3 | 3 | 4  | 5  | 3 | 4  | 5  |
| 26S protease regulatory subunit 7 OS=Mus musculus GN=Psmc2 PE=2 SV=1                                         | Q8BVQ9_MOUSE           | 53 kDa  | 1 | 3  | 6  | 7 | 6  | 3  | 7 | 7 | 6  | 3  | 7 | 6  | 3  |
| 60S ribosomal protein L5 OS=Mus musculus GN=Rpl5 PE=1 SV=3                                                   | RL5_MOUSE              | 34 kDa  | 1 | 4  | 8  | 5 | 8  | 4  | 5 | 5 | 8  | 4  | 5 | 8  | 4  |
| Transcription factor A, mitochondrial OS=Mus musculus GN=Tfam PE=1 SV=2                                      | TFAM_MOUSE             | 28 kDa  | 1 | 6  | 5  | 7 | 5  | 6  | 7 | 7 | 5  | 6  | 7 | 5  | 6  |
| Glycogenin-1 OS=Mus musculus GN=Gyg1 PE=2 SV=3                                                               | GLYG_MOUSE (+1)        | 37 kDa  | 1 | 3  | 5  | 6 | 5  | 3  | 6 | 6 | 5  | 3  | 6 | 5  | 3  |
| Muscle-related coiled-coil protein OS=Mus musculus GN=Murc PE=2 SV=1                                         | MURC_MOUSE             | 41 kDa  | 1 | 7  | 5  | 6 | 5  | 7  | 6 | 6 | 5  | 7  | 6 | 5  | 7  |
| Cluster of Myosin light polypeptide 6 OS=Mus musculus GN=Myl6 PE=1 SV=3 (MYL6_MOUSE [2])                     | MYL6_MOUSE [2]         | 17 kDa  | 1 | 3  | 7  | 8 | 7  | 3  | 8 | 8 | 7  | 3  | 8 | 7  | 3  |
| 26S protease regulatory subunit 4 OS=Mus musculus GN=Psmc1 PE=1 SV=1                                         | PRSD_MOUSE             | 49 kDa  | 1 | 0  | 7  | 3 | 7  | 0  | 3 | 3 | 7  | 0  | 3 | 7  | 0  |
| 26S proteasome non-ATPase regulatory subunit 1 OS=Mus musculus GN=Psm1 PE=1 SV=1                             | PSMD1_MOUSE            | 106 kDa | 1 | 4  | 4  | 4 | 4  | 4  | 4 | 4 | 4  | 4  | 4 | 4  | 4  |
| Cluster of Prothymosin alpha OS=Mus musculus GN=Ptma PE=1 SV=2 (PTMA_MOUSE, PTMA_MOUSE)                      | PTMA_MOUSE             | 12 kDa  | 1 | 3  | 6  | 5 | 6  | 3  | 5 | 5 | 6  | 3  | 5 | 6  | 3  |
| Bifunctional purine biosynthesis protein PURH OS=Mus musculus GN=Atic PE=1 SV=2 PUR9_MOUSE                   | PUR9_MOUSE             | 64 kDa  | 1 | 0  | 3  | 4 | 3  | 0  | 4 | 4 | 3  | 0  | 4 | 3  | 0  |
| Cluster of Protein kinase, cAMP dependent regulatory, type II alpha OS=Mus musculus: Q8K1M3_MOUSE            | Q8K1M3_MOUSE           | 46 kDa  | 1 | 4  | 6  | 9 | 6  | 4  | 9 | 9 | 6  | 4  | 9 | 6  | 4  |
| Aspartate--tRNA ligase, cytoplasmic OS=Mus musculus GN=Dars PE=2 SV=2                                        | SYDC_MOUSE             | 57 kDa  | 1 | 5  | 6  | 8 | 6  | 5  | 8 | 8 | 6  | 5  | 8 | 6  | 5  |
| Cluster of Elongation factor G, mitochondrial OS=Mus musculus GN=Gfm1 PE=2 SV=1 EFGM_MOUSE                   | EFGM_MOUSE             | 84 kDa  | 1 | 6  | 5  | 0 | 5  | 6  | 0 | 0 | 5  | 6  | 0 | 5  | 6  |
| Cluster of Protein Gm4945 OS=Mus musculus GN=Gm4945 PE=4 SV=1 (D3Z102_MOUSE D3Z102_MOUSE)                    | D3Z102_MOUSE           | 16 kDa  | 1 | 0  | 0  | 3 | 0  | 0  | 3 | 3 | 0  | 0  | 3 | 0  | 0  |
| Cluster of Protein Et14 OS=Mus musculus GN=Et14 PE=2 SV=1 (E9QAU4_MOUSE)                                     | E9QAU4_MOUSE           | 218 kDa | 1 | 3  | 0  | 0 | 0  | 3  | 0 | 0 | 0  | 3  | 0 | 0  | 3  |
| Coiled-coil protein associated with myosin II and DISC1 OS=Mus musculus GN=Ccdc14 A2AST1_MOUSE (+1)          | A2AST1_MOUSE (+1)      | 165 kDa | 1 | 0  | 3  | 0 | 3  | 0  | 0 | 0 | 3  | 0  | 0 | 3  | 0  |
| Cluster of Rab GDP dissociation inhibitor beta OS=Mus musculus GN=Gdi2 PE=1 SV=1 GDIB_MOUSE [2]              | GDIB_MOUSE [2]         | 51 kDa  | 1 | 5  | 5  | 4 | 5  | 5  | 4 | 4 | 5  | 5  | 4 | 5  | 5  |
| Cluster of Glyoxalase domain-containing protein 4 OS=Mus musculus GN=Glod4 PE=2 GLOD4_MOUSE [2]              | GLOD4_MOUSE [2]        | 33 kDa  | 1 | 7  | 7  | 8 | 7  | 7  | 8 | 8 | 7  | 7  | 8 | 7  | 7  |
| Eukaryotic translation initiation factor 5A-1 OS=Mus musculus GN=Eif5a PE=1 SV=2                             | IF5A1_MOUSE            | 17 kDa  | 1 | 6  | 0  | 5 | 0  | 6  | 5 | 5 | 0  | 6  | 5 | 0  | 6  |
| Junctophilin-2 OS=Mus musculus GN=Jph2 PE=1 SV=2                                                             | JPH2_MOUSE             | 75 kDa  | 1 | 10 | 5  | 8 | 5  | 10 | 8 | 8 | 5  | 10 | 8 | 5  | 10 |
| Cluster of Poly(rC)-binding protein 1 OS=Mus musculus GN=Pcbp1 PE=1 SV=1 (PCBP1_MOUSE PCBP1_MOUSE [4])       | PCBP1_MOUSE            | 37 kDa  | 1 | 3  | 6  | 6 | 6  | 3  | 6 | 6 | 6  | 3  | 6 | 6  | 3  |
| Programmed cell death 6-interacting protein OS=Mus musculus GN=Pdc6ip PE=1 SV=1 PDC6_MOUSE                   | PDC6_MOUSE             | 96 kDa  | 1 | 5  | 7  | 5 | 7  | 5  | 7 | 7 | 5  | 4  | 7 | 5  | 4  |
| Cluster of Ank1 protein OS=Mus musculus GN=Ank1 PE=2 SV=1 (Q0VGY9_MOUSE)                                     | Q0VGY9_MOUSE [3]       | 207 kDa | 1 | 2  | 2  | 3 | 2  | 2  | 3 | 3 | 2  | 2  | 3 | 2  | 2  |
| Sorting and assembly machinery component 50 homolog OS=Mus musculus GN=Samr SAM50_MOUSE                      | SAM50_MOUSE            | 52 kDa  | 1 | 4  | 6  | 6 | 6  | 4  | 6 | 6 | 6  | 4  | 6 | 6  | 4  |
| T-complex protein 1 subunit theta OS=Mus musculus GN=Cct8 PE=1 SV=3                                          | TCPO_MOUSE             | 60 kDa  | 1 | 7  | 8  | 7 | 8  | 7  | 7 | 7 | 8  | 7  | 7 | 8  | 7  |
| Cluster of Muscular LMNA-interacting protein OS=Mus musculus GN=Mlip PE=4 SV=1 tr V9GWW6 V9GWW6_MOUSE        | V9GWW6_MOUSE           | 4 kDa   | 1 | 4  | 4  | 8 | 4  | 4  | 8 | 8 | 4  | 4  | 8 | 4  | 4  |
| Cluster of Isoform 2 of Protein phosphatase 1 regulatory subunit 12A OS=Mus musculus sp Q9DBR7-2 MYPT1_MOUSE | Q9DBR7-2_MOUSE         | 4 kDa   | 1 | 0  | 0  | 3 | 0  | 0  | 3 | 3 | 0  | 0  | 3 | 0  | 0  |
| Mitochondrial pyruvate carrier 2 OS=Mus musculus GN=Mpc2 PE=1 SV=1                                           | MPC2_MOUSE             | 14 kDa  | 1 | 4  | 4  | 5 | 4  | 4  | 5 | 5 | 4  | 4  | 5 | 4  | 4  |
| Cluster of Replication factor C subunit 1 OS=Mus musculus GN=Rfc1 PE=2 SV=1 (G3UUG3UWX1_MOUSE [6])           | G3UUG3UWX1_MOUSE [6]   | 126 kDa | 1 | 3  | 0  | 0 | 0  | 3  | 0 | 0 | 0  | 3  | 0 | 0  | 3  |
| Cluster of Calumenin OS=Mus musculus GN=Calu PE=1 SV=1 (CALU_MOUSE)                                          | CALU_MOUSE             | 37 kDa  | 1 | 7  | 5  | 5 | 5  | 7  | 5 | 5 | 5  | 7  | 5 | 5  | 7  |
| 60S acidic ribosomal protein P0 (Fragment) OS=Mus musculus GN=Rplp0 PE=2 SV=1                                | D3YVM5_MOUSE (+2)      | 16 kDa  | 1 | 0  | 6  | 6 | 6  | 0  | 6 | 6 | 6  | 0  | 6 | 6  | 0  |
| Filamin-B OS=Mus musculus GN=Flnb PE=1 SV=3                                                                  | FLNB_MOUSE             | 278 kDa | 1 | 2  | 1  | 5 | 1  | 2  | 5 | 5 | 1  | 2  | 5 | 1  | 2  |
| Pyruvate carboxylase OS=Mus musculus GN=Pcx PE=3 SV=1                                                        | G5E8R3_MOUSE (+1)      | 130 kDa | 1 | 0  | 7  | 4 | 7  | 0  | 4 | 4 | 7  | 0  | 4 | 7  | 0  |
| Unconventional myosin-Ic OS=Mus musculus GN=Myo1c PE=1 SV=2                                                  | MYO1C_MOUSE (+3)       | 122 kDa | 1 | 5  | 7  | 0 | 7  | 5  | 0 | 0 | 7  | 5  | 0 | 7  | 5  |
| 26S protease regulatory subunit 6A OS=Mus musculus GN=Psmc3 PE=1 SV=2                                        | PRSDA_MOUSE            | 50 kDa  | 1 | 3  | 5  | 3 | 5  | 3  | 3 | 3 | 5  | 3  | 3 | 5  | 3  |
| Radixin OS=Mus musculus GN=Rdx PE=1 SV=3                                                                     | RADI_MOUSE             | 69 kDa  | 1 | 3  | 4  | 5 | 4  | 3  | 5 | 5 | 4  | 3  | 5 | 4  | 3  |
| 60S ribosomal protein L8 OS=Mus musculus GN=Rpl8 PE=2 SV=2                                                   | RL8_MOUSE              | 28 kDa  | 1 | 3  | 5  | 4 | 5  | 3  | 4 | 4 | 5  | 3  | 4 | 5  | 3  |
| Bifunctional glutamate/proline--tRNA ligase OS=Mus musculus GN=Eprs PE=1 SV=4                                | SYEP_MOUSE             | 170 kDa | 1 | 5  | 4  | 3 | 4  | 5  | 3 | 3 | 4  | 5  | 3 | 4  | 5  |



|                                                                                                                      |                   |         |   |   |   |   |   |   |   |   |   |   |   |   |   |
|----------------------------------------------------------------------------------------------------------------------|-------------------|---------|---|---|---|---|---|---|---|---|---|---|---|---|---|
| T-complex protein 1 subunit eta OS=Mus musculus GN=Cct7 PE=1 SV=1                                                    | TCPH_MOUSE        | 60 kDa  | 1 | 3 | 5 | 8 | 5 | 3 | 8 | 8 | 5 | 3 | 8 | 5 | 3 |
| Cluster of STE20-like serine/threonine-protein kinase OS=Mus musculus GN=Slk PE=1 SV=1                               | SLK_MOUSE [2]     | 141 kDa | 1 | 4 | 0 | 0 | 0 | 0 | 0 | 0 | 0 | 0 | 0 | 0 | 4 |
| Cluster of Uncharacterized protein OS=Mus musculus GN=Gm10260 PE=3 SV=2 (F6YV F6YV7_MOUSE [2])                       |                   | 18 kDa  | 1 | 0 | 0 | 5 | 0 | 0 | 5 | 5 | 0 | 5 | 0 | 0 | 0 |
| Cluster of 5-azacytidine induced gene 1 OS=Mus musculus GN=Azi1 PE=2 SV=1 (B1AXI B1AXI9_MOUSE [2])                   |                   | 120 kDa | 1 | 3 | 0 | 0 | 0 | 3 | 0 | 0 | 0 | 3 | 0 | 0 | 3 |
| Eukaryotic translation initiation factor 3 subunit G OS=Mus musculus GN=EIF3G PE=1 SV=1                              | EIF3G_MOUSE       | 36 kDa  | 1 | 3 | 0 | 0 | 0 | 3 | 0 | 0 | 0 | 3 | 0 | 0 | 3 |
| Rho GDP-dissociation inhibitor 1 OS=Mus musculus GN=Arhgdia PE=1 SV=3                                                | GDIR1_MOUSE       | 23 kDa  | 1 | 7 | 4 | 5 | 4 | 7 | 5 | 5 | 4 | 7 | 5 | 4 | 7 |
| 60S ribosomal protein L10 (Fragment) OS=Mus musculus GN=Rpl10 PE=4 SV=1                                              | I7HLV2_MOUSE (+1) | 23 kDa  | 1 | 5 | 3 | 3 | 3 | 5 | 3 | 3 | 3 | 5 | 3 | 3 | 5 |
| Lipoprotein lipase OS=Mus musculus GN=Lpl PE=1 SV=3                                                                  | LPL_MOUSE         | 53 kDa  | 1 | 5 | 6 | 7 | 6 | 5 | 7 | 7 | 6 | 5 | 7 | 6 | 5 |
| Myosin-10 OS=Mus musculus GN=Myl10 PE=1 SV=2                                                                         | MYH10_MOUSE (+2)  | 229 kDa | 1 | 2 | 1 | 1 | 2 | 1 | 1 | 1 | 2 | 1 | 2 | 1 | 2 |
| Nuclear pore complex-associated intranuclear coiled-coil protein TPR OS=Mus musculus GN=Q7M739_MOUSE                 |                   | 267 kDa | 1 | 0 | 3 | 0 | 3 | 0 | 0 | 0 | 3 | 0 | 0 | 3 | 0 |
| 60S ribosomal protein L31 OS=Mus musculus GN=Rpl31 PE=2 SV=1                                                         | RL31_MOUSE        | 14 kDa  | 1 | 4 | 6 | 5 | 6 | 4 | 5 | 6 | 4 | 5 | 6 | 4 | 4 |
| 40S ribosomal protein S3 OS=Mus musculus GN=Rps3 PE=1 SV=1                                                           | RS3_MOUSE         | 27 kDa  | 1 | 6 | 6 | 6 | 6 | 6 | 6 | 6 | 6 | 6 | 6 | 6 | 6 |
| Adenosylhomocysteinase OS=Mus musculus GN=Ahcy PE=1 SV=3                                                             | SAHH_MOUSE        | 48 kDa  | 1 | 7 | 4 | 4 | 4 | 7 | 4 | 4 | 4 | 7 | 4 | 4 | 7 |
| T-complex protein 1 subunit alpha OS=Mus musculus GN=Tcp1 PE=1 SV=3                                                  | TCPA_MOUSE        | 60 kDa  | 1 | 4 | 7 | 7 | 7 | 4 | 7 | 7 | 7 | 4 | 7 | 7 | 4 |
| NADH dehydrogenase [ubiquinone] 1 beta subcomplex subunit 3 OS=Mus musculus GN=NDUB3_MOUSE                           |                   | 12 kDa  | 1 | 4 | 4 | 5 | 4 | 4 | 5 | 5 | 4 | 4 | 5 | 4 | 4 |
| UPF0317 protein C14orf159 homolog, mitochondrial OS=Mus musculus PE=2 SV=1                                           | CN159_MOUSE (+1)  | 66 kDa  | 1 | 7 | 6 | 5 | 6 | 7 | 5 | 5 | 6 | 7 | 5 | 6 | 7 |
| Collagen alpha-2(VI) chain OS=Mus musculus GN=Col6a2 PE=2 SV=3                                                       | CO6A2_MOUSE       | 110 kDa | 1 | 3 | 5 | 4 | 5 | 3 | 4 | 4 | 5 | 3 | 4 | 5 | 3 |
| 60S ribosomal protein L13a OS=Mus musculus GN=Rpl13a PE=2 SV=1                                                       | E9Q5A0_MOUSE      | 48 kDa  | 1 | 0 | 4 | 3 | 4 | 0 | 3 | 3 | 4 | 0 | 3 | 4 | 0 |
| Kinesin-like protein KIF21B OS=Mus musculus GN=Kif21b PE=2 SV=1                                                      | F8VQE2_MOUSE (+1) | 181 kDa | 1 | 3 | 0 | 0 | 0 | 3 | 0 | 0 | 0 | 3 | 0 | 0 | 3 |
| Histone H1.1 OS=Mus musculus GN=Hist1h1a PE=1 SV=2                                                                   | H11_MOUSE         | 22 kDa  | 1 | 2 | 0 | 1 | 0 | 2 | 1 | 1 | 0 | 2 | 1 | 0 | 2 |
| GTP:AMP phosphotransferase, mitochondrial OS=Mus musculus GN=Ak3 PE=1 SV=3                                           | KAD3_MOUSE        | 25 kDa  | 1 | 8 | 8 | 7 | 8 | 8 | 7 | 7 | 8 | 8 | 7 | 8 | 8 |
| Cluster of NADH dehydrogenase [ubiquinone] 1 beta subcomplex subunit 8, mitochondrion OS=Mus musculus GN=NDUB8_MOUSE |                   | 22 kDa  | 1 | 0 | 6 | 7 | 6 | 0 | 7 | 7 | 6 | 0 | 7 | 6 | 0 |
| 60S ribosomal protein L13 OS=Mus musculus GN=Rpl13 PE=2 SV=3                                                         | RL13_MOUSE        | 24 kDa  | 1 | 5 | 7 | 4 | 7 | 5 | 4 | 4 | 7 | 5 | 4 | 7 | 5 |
| T-complex protein 1 subunit beta OS=Mus musculus GN=Cct2 PE=1 SV=4                                                   | TCPB_MOUSE        | 57 kDa  | 1 | 3 | 6 | 3 | 6 | 3 | 3 | 3 | 6 | 3 | 3 | 6 | 3 |
| Mitochondrial import inner membrane translocase subunit TIM44 OS=Mus musculus GN=TIM44_MOUSE                         |                   | 51 kDa  | 1 | 4 | 4 | 7 | 4 | 4 | 7 | 7 | 4 | 4 | 7 | 4 | 4 |
| Transketolase OS=Mus musculus GN=Tkt PE=1 SV=1                                                                       | TKT_MOUSE         | 68 kDa  | 1 | 5 | 5 | 4 | 5 | 5 | 4 | 4 | 5 | 4 | 5 | 4 | 5 |
| NADH dehydrogenase [ubiquinone] 1 beta subcomplex subunit 6 OS=Mus musculus GN=A2AP32_MOUSE (+1)                     |                   | 12 kDa  | 1 | 0 | 0 | 4 | 0 | 0 | 4 | 0 | 0 | 4 | 0 | 0 | 0 |
| Cluster of Mitochondrial pyruvate carrier 1 OS=Mus musculus GN=Mpc1 PE=1 SV=1 (MPC1_MOUSE [3])                       |                   | 12 kDa  | 1 | 3 | 0 | 0 | 0 | 3 | 0 | 0 | 0 | 3 | 0 | 0 | 3 |
| Cluster of Probable helicase senataxin OS=Mus musculus GN=Setx PE=2 SV=1 (SETX_A.SETX_MOUSE)                         |                   | 298 kDa | 1 | 4 | 0 | 0 | 0 | 4 | 0 | 0 | 0 | 4 | 0 | 0 | 4 |
| Ubiquinone biosynthesis monooxygenase COQ6 OS=Mus musculus GN=Coq6 PE=2 SV=2                                         | COQ6_MOUSE        | 51 kDa  | 1 | 5 | 6 | 4 | 6 | 5 | 4 | 4 | 6 | 5 | 4 | 6 | 5 |
| Cluster of D-dopachrome decarboxylase OS=Mus musculus GN=Ddt PE=1 SV=3 (DOPD DOPD_MOUSE)                             |                   | 13 kDa  | 1 | 0 | 4 | 0 | 0 | 4 | 0 | 4 | 0 | 4 | 0 | 4 | 0 |
| MCG116065 OS=Mus musculus GN=Gm6472 PE=4 SV=1                                                                        | J3QJZ3_MOUSE (+1) | 22 kDa  | 1 | 5 | 7 | 5 | 7 | 5 | 5 | 5 | 7 | 5 | 5 | 7 | 5 |
| NADH dehydrogenase [ubiquinone] 1 alpha subcomplex subunit 12 OS=Mus musculus GN=NDUAC_MOUSE                         |                   | 17 kDa  | 1 | 6 | 7 | 5 | 7 | 6 | 5 | 5 | 7 | 6 | 5 | 7 | 6 |
| Plasminogen OS=Mus musculus GN=Plg PE=1 SV=3                                                                         | PLMN_MOUSE        | 91 kDa  | 1 | 6 | 7 | 8 | 7 | 6 | 8 | 8 | 7 | 6 | 8 | 7 | 6 |
| Cluster of Serine/threonine-protein phosphatase PP1-alpha catalytic subunit OS=Mus musculus GN=PP1A_MOUSE [4]        |                   | 38 kDa  | 1 | 5 | 6 | 5 | 6 | 5 | 5 | 6 | 5 | 5 | 6 | 5 | 5 |
| 60S ribosomal protein L27 OS=Mus musculus GN=Rpl27 PE=2 SV=2                                                         | RL27_MOUSE        | 16 kDa  | 1 | 3 | 4 | 5 | 4 | 3 | 5 | 5 | 4 | 3 | 5 | 4 | 3 |
| 40S ribosomal protein S25 OS=Mus musculus GN=Rps25 PE=2 SV=1                                                         | RS25_MOUSE        | 14 kDa  | 1 | 3 | 5 | 4 | 5 | 3 | 4 | 4 | 5 | 3 | 4 | 5 | 3 |
| Heat shock protein 75 kDa, mitochondrial OS=Mus musculus GN=Trap1 PE=1 SV=1                                          | TRAP1_MOUSE       | 80 kDa  | 1 | 4 | 4 | 6 | 4 | 4 | 6 | 6 | 4 | 4 | 6 | 4 | 4 |
| Zinc-binding alcohol dehydrogenase domain-containing protein 2 OS=Mus musculus GN=CZADH2_MOUSE                       |                   | 41 kDa  | 1 | 4 | 9 | 6 | 9 | 4 | 6 | 6 | 9 | 4 | 6 | 9 | 4 |
| Synaptopodin 2-like protein OS=Mus musculus GN=Synpo2l PE=2 SV=1                                                     | B2RQK7_MOUSE      | 103 kDa | 1 | 0 | 3 | 0 | 3 | 0 | 0 | 0 | 3 | 0 | 0 | 3 | 0 |
| 40S ribosomal protein S5 (Fragment) OS=Mus musculus GN=Rps5 PE=3 SV=1                                                | D3YYM6_MOUSE (+2) | 20 kDa  | 1 | 0 | 3 | 0 | 3 | 0 | 0 | 0 | 3 | 0 | 0 | 3 | 0 |
| Dystroglycan OS=Mus musculus GN=Dag1 PE=1 SV=4                                                                       | DAG1_MOUSE        | 97 kDa  | 1 | 4 | 4 | 4 | 4 | 4 | 4 | 4 | 4 | 4 | 4 | 4 | 4 |
| Eukaryotic translation initiation factor 4 gamma 1 OS=Mus musculus GN=EIF4g1 PE=2 SV=1                               | E9PVC5_MOUSE      | 175 kDa | 1 | 3 | 7 | 5 | 7 | 3 | 5 | 5 | 7 | 3 | 5 | 7 | 3 |
| Ras-related protein Rab-11A OS=Mus musculus GN=Rab11a PE=2 SV=1                                                      | E9Q3P9_MOUSE (+4) | 17 kDa  | 1 | 4 | 6 | 5 | 6 | 4 | 5 | 5 | 6 | 4 | 5 | 6 | 4 |
| Cluster of Protein Serpinb6a OS=Mus musculus GN=Serpib6a PE=2 SV=1 (F8WIV2_M F8WIV2_MOUSE [3])                       |                   | 45 kDa  | 1 | 4 | 6 | 5 | 6 | 4 | 5 | 5 | 6 | 4 | 5 | 6 | 4 |
| Four and a half LIM domains protein 1 OS=Mus musculus GN=Fhl1 PE=2 SV=3                                              | FHL1_MOUSE        | 32 kDa  | 1 | 4 | 6 | 7 | 6 | 4 | 7 | 7 | 6 | 4 | 7 | 6 | 4 |
| Glutaryl-CoA dehydrogenase, mitochondrial OS=Mus musculus GN=Gcdh PE=2 SV=2                                          | GCDH_MOUSE        | 49 kDa  | 1 | 3 | 3 | 3 | 3 | 3 | 3 | 3 | 3 | 3 | 3 | 3 | 3 |
| Importin-5 OS=Mus musculus GN=Ipo5 PE=1 SV=3                                                                         | IPO5_MOUSE        | 124 kDa | 1 | 3 | 7 | 3 | 7 | 3 | 3 | 3 | 7 | 3 | 3 | 7 | 3 |
| MAP7 domain-containing protein 1 OS=Mus musculus GN=Map7d1 PE=1 SV=1                                                 | MA7D1_MOUSE       | 93 kDa  | 1 | 0 | 4 | 0 | 4 | 0 | 0 | 0 | 4 | 0 | 0 | 4 | 0 |
| Cluster of Myosin regulatory light chain 12B OS=Mus musculus GN=Myl12b PE=1 SV=1 (ML12B_MOUSE [3])                   |                   | 20 kDa  | 1 | 4 | 4 | 4 | 4 | 4 | 4 | 4 | 4 | 4 | 4 | 4 | 4 |
| Myosin light chain kinase 3 OS=Mus musculus GN=Mylk3 PE=1 SV=1                                                       | MYLK3_MOUSE       | 86 kDa  | 1 | 2 | 3 | 3 | 3 | 2 | 3 | 3 | 3 | 2 | 3 | 3 | 2 |
| Serine/threonine-protein phosphatase 2A catalytic subunit alpha isoform OS=Mus musculus GN=PP2AA_MOUSE               |                   | 36 kDa  | 1 | 7 | 3 | 3 | 3 | 7 | 3 | 3 | 3 | 7 | 3 | 3 | 7 |
| 60S ribosomal protein L10a OS=Mus musculus GN=Rpl10a PE=1 SV=3                                                       | RL10A_MOUSE       | 25 kDa  | 1 | 6 | 5 | 0 | 5 | 6 | 0 | 0 | 5 | 6 | 0 | 5 | 6 |
| Cluster of T-complex protein 1 subunit delta OS=Mus musculus GN=Cct4 PE=1 SV=3 (TCPD_MOUSE [2])                      |                   | 58 kDa  | 1 | 3 | 6 | 8 | 6 | 3 | 8 | 8 | 6 | 3 | 8 | 6 | 3 |
| Cluster of NEDD8-conjugating enzyme Ubc12 OS=Mus musculus GN=Ubc2m PE=2 SV=2                                         | UBC12_MOUSE       | 21 kDa  | 1 | 0 | 4 | 3 | 4 | 0 | 3 | 3 | 4 | 0 | 3 | 4 | 0 |
| Cluster of Estradiol 17-beta-dehydrogenase 8 OS=Mus musculus GN=Hsd17b8 PE=1 SV=1 (DH8_MOUSE [2])                    |                   | 27 kDa  | 1 | 0 | 7 | 7 | 7 | 0 | 7 | 7 | 7 | 0 | 7 | 7 | 0 |
| Cluster of NSF1 cofactor p47 OS=Mus musculus GN=Nsf1c PE=2 SV=1 (A2AT02_MOL A2AT02_MOUSE [4])                        |                   | 37 kDa  | 1 | 5 | 4 | 7 | 4 | 5 | 7 | 7 | 4 | 5 | 7 | 4 | 5 |
| Ras suppressor protein 1 OS=Mus musculus GN=Rsu1 PE=4 SV=1                                                           | A2AUR7_MOUSE (+2) | 30 kDa  | 1 | 0 | 7 | 7 | 7 | 0 | 7 | 7 | 7 | 0 | 7 | 7 | 0 |
| ATPase family AAA domain-containing protein 1 OS=Mus musculus GN=Atad1 PE=1 SV=1                                     | ATAD1_MOUSE       | 41 kDa  | 1 | 0 | 0 | 4 | 0 | 0 | 4 | 4 | 0 | 0 | 4 | 0 | 0 |
| Clustered mitochondria protein homolog OS=Mus musculus GN=Cluh PE=2 SV=2                                             | CLU_MOUSE         | 148 kDa | 1 | 0 | 0 | 3 | 0 | 0 | 3 | 3 | 0 | 0 | 3 | 0 | 0 |
| Malonyl-CoA decarboxylase, mitochondrial OS=Mus musculus GN=Mlycd PE=2 SV=1                                          | DCMC_MOUSE        | 55 kDa  | 1 | 4 | 5 | 6 | 5 | 4 | 6 | 6 | 5 | 4 | 6 | 5 | 4 |
| Protein Rpl3l OS=Mus musculus GN=Rpl3l PE=2 SV=1                                                                     | E9PWZ3_MOUSE      | 47 kDa  | 1 | 1 | 6 | 3 | 6 | 1 | 3 | 3 | 6 | 1 | 3 | 6 | 1 |
| Cluster of Calcium/calmodulin-dependent protein kinase type II subunit delta OS=Mus musculus GN=E9Q1T1_MOUSE [2]     |                   | 60 kDa  | 1 | 4 | 4 | 5 | 4 | 4 | 5 | 4 | 4 | 5 | 4 | 4 | 5 |
| Cardiomyopathy-associated protein 5 OS=Mus musculus GN=Cmya5 PE=4 SV=1                                               | E9QLJ0_MOUSE      | 406 kDa | 1 | 0 | 7 | 5 | 7 | 0 | 5 | 5 | 7 | 0 | 5 | 7 | 0 |
| Ezrin OS=Mus musculus GN=Ezr PE=1 SV=3                                                                               | EZRI_MOUSE        | 69 kDa  | 1 | 1 | 4 | 2 | 4 | 1 | 2 | 2 | 4 | 1 | 2 | 4 | 1 |
| Protein FAM162A OS=Mus musculus GN=Fam162a PE=2 SV=1                                                                 | F162A_MOUSE       | 18 kDa  | 1 | 0 | 4 | 5 | 4 | 0 | 5 | 5 | 4 | 0 | 5 | 4 | 0 |

|                                                                                                                |                   |         |   |   |   |   |   |   |   |   |   |   |   |   |   |
|----------------------------------------------------------------------------------------------------------------|-------------------|---------|---|---|---|---|---|---|---|---|---|---|---|---|---|
| Cluster of Hydroxyacyl glutathione hydrolase OS=Mus musculus GN=Hagh PE=3 SV=1                                 | G5E8T9_MOUSE [2]  | 34 kDa  | 1 | 0 | 6 | 4 | 6 | 0 | 4 | 4 | 6 | 0 | 4 | 6 | 0 |
| Heterogeneous nuclear ribonucleoprotein L (Fragment) OS=Mus musculus GN=Hnrrp G5E924_MOUSE                     |                   | 67 kDa  | 1 | 3 | 6 | 4 | 6 | 3 | 4 | 4 | 6 | 3 | 4 | 6 | 3 |
| Bifunctional epoxide hydrolase 2 OS=Mus musculus GN=Ephx2 PE=1 SV=2                                            | HYES_MOUSE        | 63 kDa  | 1 | 3 | 6 | 4 | 6 | 3 | 4 | 4 | 6 | 3 | 4 | 6 | 3 |
| Kelch-like protein 41 OS=Mus musculus GN=Klhl41 PE=1 SV=1                                                      | KLHL41_MOUSE      | 68 kDa  | 1 | 3 | 5 | 3 | 5 | 3 | 3 | 3 | 5 | 3 | 3 | 5 | 3 |
| Mitochondrial peptide methionine sulfoxide reductase OS=Mus musculus GN=Msra P MSRA_MOUSE                      |                   | 26 kDa  | 1 | 7 | 6 | 5 | 6 | 7 | 5 | 5 | 6 | 7 | 5 | 6 | 7 |
| Metaxin-2 OS=Mus musculus GN=Mtx2 PE=1 SV=1                                                                    | MTX2_MOUSE        | 30 kDa  | 1 | 0 | 7 | 5 | 7 | 0 | 5 | 5 | 7 | 0 | 5 | 7 | 0 |
| Cluster of 2-oxoisovalerate dehydrogenase subunit alpha, mitochondrial OS=Mus musculus GN=ODBA_MOUSE [2]       |                   | 50 kDa  | 1 | 4 | 0 | 3 | 0 | 4 | 3 | 3 | 0 | 4 | 3 | 0 | 4 |
| Protein disulfide-isomerase A6 OS=Mus musculus GN=Pdia6 PE=1 SV=3                                              | PDIA6_MOUSE (+1)  | 48 kDa  | 1 | 4 | 4 | 4 | 4 | 4 | 4 | 4 | 4 | 4 | 4 | 4 | 4 |
| [Pyruvate dehydrogenase [lipoamide]] kinase isozyme 2, mitochondrial OS=Mus musculus GN=PKK2_MOUSE             |                   | 46 kDa  | 1 | 3 | 5 | 7 | 5 | 3 | 7 | 7 | 5 | 3 | 7 | 5 | 3 |
| Heterogeneous nuclear ribonucleoprotein A1 OS=Mus musculus GN=Hnmpa1 PE=2 SV=2                                 | Q5EBP8_MOUSE (+1) | 39 kDa  | 1 | 4 | 6 | 7 | 6 | 4 | 7 | 7 | 6 | 4 | 7 | 6 | 4 |
| 40S ribosomal protein S8 OS=Mus musculus GN=Rps8 PE=1 SV=2                                                     | RS8_MOUSE         | 24 kDa  | 1 | 4 | 0 | 0 | 0 | 0 | 0 | 0 | 0 | 0 | 0 | 0 | 0 |
| Septin-7 OS=Mus musculus GN=Sept7 PE=1 SV=1                                                                    | SEPT7_MOUSE       | 51 kDa  | 1 | 2 | 3 | 2 | 3 | 2 | 2 | 2 | 2 | 3 | 2 | 3 | 2 |
| Sulfide:quinone oxidoreductase, mitochondrial OS=Mus musculus GN=Sqrldl PE=2 SV=2                              | SQRD_MOUSE        | 50 kDa  | 1 | 0 | 3 | 0 | 3 | 0 | 0 | 0 | 0 | 3 | 0 | 0 | 3 |
| Phenylalanine--tRNA ligase beta subunit OS=Mus musculus GN=Farsb PE=2 SV=2                                     | SYFB_MOUSE        | 66 kDa  | 1 | 0 | 3 | 0 | 3 | 0 | 0 | 0 | 3 | 0 | 0 | 3 | 0 |
| Cluster of T-complex protein 1 subunit zeta OS=Mus musculus GN=Cct6a PE=1 SV=3                                 | ITCP3_MOUSE       | 58 kDa  | 1 | 6 | 3 | 3 | 3 | 6 | 3 | 3 | 3 | 6 | 3 | 3 | 6 |
| Dedicator of cytokinesis protein 7 OS=Mus musculus GN=Dock7 PE=2 SV=1                                          | A2A9M5_MOUSE (+2) | 241 kDa | 1 | 3 | 0 | 0 | 0 | 3 | 0 | 0 | 0 | 3 | 0 | 0 | 3 |
| Apolipoprotein E OS=Mus musculus GN=ApoE PE=1 SV=2                                                             | APOE_MOUSE        | 36 kDa  | 1 | 0 | 3 | 0 | 3 | 0 | 0 | 0 | 3 | 0 | 0 | 3 | 0 |
| Bola-like protein 3 OS=Mus musculus GN=Bola3 PE=2 SV=1                                                         | BOLA3_MOUSE       | 12 kDa  | 1 | 3 | 3 | 4 | 3 | 3 | 4 | 4 | 3 | 3 | 4 | 3 | 3 |
| Dihydropteridine reductase OS=Mus musculus GN=Qdpr PE=1 SV=2                                                   | DHPR_MOUSE        | 26 kDa  | 1 | 3 | 3 | 7 | 3 | 3 | 7 | 3 | 3 | 7 | 3 | 3 | 3 |
| Cluster of Proteasome subunit alpha type-7 OS=Mus musculus GN=Psm7 PE=1 SV=1                                   | PSA7_MOUSE        | 28 kDa  | 1 | 3 | 3 | 0 | 3 | 3 | 0 | 0 | 3 | 3 | 0 | 3 | 3 |
| Ryanodine receptor 1 OS=Mus musculus GN=Ryr1 PE=1 SV=1                                                         | RYR1_MOUSE        | 565 kDa | 1 | 0 | 0 | 0 | 0 | 0 | 0 | 0 | 0 | 0 | 0 | 0 | 0 |
| Cluster of Isoform 2 of Clathrin light chain B OS=Mus musculus GN=Cltb (sp) Q6IRU5-2 sp) Q6IRU5-2) CLCB_MOUSE? |                   |         | 1 | 5 | 4 | 6 | 4 | 5 | 6 | 6 | 4 | 5 | 6 | 4 | 5 |
| Cluster of Aldose reductase-related protein 1 OS=Mus musculus GN=Akr1b7 PE=2 SV=2                              | ALD1_MOUSE [3]    | 36 kDa  | 1 | 0 | 6 | 3 | 6 | 0 | 3 | 3 | 6 | 0 | 3 | 6 | 0 |
| Apolipoprotein O OS=Mus musculus GN=ApoO PE=2 SV=1                                                             | APOO_MOUSE        | 24 kDa  | 1 | 4 | 0 | 0 | 0 | 4 | 0 | 0 | 0 | 4 | 0 | 0 | 4 |
| Cluster of 60S ribosomal protein L12 OS=Mus musculus GN=Rpl12 PE=1 SV=2                                        | RL12_MOUSE        | 18 kDa  | 1 | 3 | 0 | 5 | 0 | 3 | 5 | 5 | 0 | 3 | 5 | 0 | 3 |
| Cluster of 60S ribosomal protein L32 OS=Mus musculus GN=Rpl32 PE=2 SV=2                                        | RL32_MOUSE        | 16 kDa  | 1 | 3 | 0 | 0 | 0 | 3 | 0 | 0 | 0 | 3 | 0 | 0 | 3 |
| Cluster of Transforming acidic coiled-coil-containing protein 2 OS=Mus musculus GN=EQQ8T1_MOUSE                |                   | 305 kDa | 1 | 0 | 4 | 4 | 4 | 0 | 4 | 4 | 4 | 0 | 4 | 4 | 0 |
| 6-phosphogluconolactonase OS=Mus musculus GN=Pgl3 PE=2 SV=1                                                    | 6PGL_MOUSE        | 27 kDa  | 1 | 0 | 4 | 3 | 4 | 0 | 3 | 3 | 4 | 0 | 3 | 4 | 0 |
| Alpha-actinin-4 OS=Mus musculus GN=Actn4 PE=1 SV=1                                                             | ACTN4_MOUSE       | 105 kDa | 1 | 5 | 6 | 4 | 6 | 5 | 4 | 4 | 6 | 5 | 4 | 6 | 5 |
| Cytosol aminopeptidase OS=Mus musculus GN=Lap3 PE=1 SV=3                                                       | AMPL_MOUSE (+1)   | 56 kDa  | 1 | 0 | 5 | 9 | 5 | 0 | 9 | 9 | 5 | 0 | 9 | 5 | 0 |
| Beta-2-glycoprotein 1 OS=Mus musculus GN=ApoH PE=1 SV=1                                                        | APOH_MOUSE        | 39 kDa  | 1 | 3 | 6 | 3 | 3 | 6 | 6 | 3 | 3 | 6 | 3 | 3 | 3 |
| Thioredoxin reductase 2, mitochondrial OS=Mus musculus GN=Txnrd2 PE=2 SV=1                                     | D3Z0K8_MOUSE (+3) | 53 kDa  | 1 | 0 | 6 | 7 | 6 | 0 | 7 | 7 | 6 | 0 | 7 | 6 | 0 |
| Cluster of Guanine nucleotide-binding protein G(I)/G(S)/G(T) subunit beta-1 OS=Mus musculus GN=GBB1_MOUSE [3]  |                   | 37 kDa  | 1 | 4 | 5 | 7 | 5 | 4 | 7 | 7 | 5 | 4 | 7 | 5 | 4 |
| 28 kDa heat- and acid-stable phosphoprotein OS=Mus musculus GN=Pdap1 PE=1 SV=1                                 | HAP28_MOUSE       | 21 kDa  | 1 | 4 | 4 | 4 | 4 | 4 | 4 | 4 | 4 | 4 | 4 | 4 | 4 |
| Integrin-linked protein kinase OS=Mus musculus GN=Ilk PE=1 SV=2                                                | ILK_MOUSE         | 51 kDa  | 1 | 0 | 6 | 5 | 6 | 0 | 5 | 5 | 6 | 0 | 5 | 6 | 0 |
| Lamin-B2 OS=Mus musculus GN=Lmb2 PE=1 SV=2                                                                     | LMBN2_MOUSE       | 67 kDa  | 1 | 1 | 4 | 5 | 4 | 1 | 5 | 5 | 4 | 1 | 5 | 4 | 1 |
| Leiomodin-2 OS=Mus musculus GN=Lmod2 PE=1 SV=1                                                                 | LMOD2_MOUSE       | 62 kDa  | 1 | 0 | 4 | 4 | 4 | 0 | 4 | 4 | 4 | 0 | 4 | 4 | 0 |
| Nidogen-2 OS=Mus musculus GN=Nid2 PE=1 SV=2                                                                    | NID2_MOUSE        | 154 kDa | 1 | 5 | 5 | 7 | 5 | 5 | 7 | 7 | 5 | 5 | 7 | 5 | 5 |
| 2-oxoisovalerate dehydrogenase subunit beta, mitochondrial OS=Mus musculus GN=EOD8B_MOUSE                      |                   | 43 kDa  | 1 | 3 | 4 | 7 | 4 | 3 | 7 | 7 | 4 | 3 | 7 | 4 | 3 |
| Ubiquitin carboxyl-terminal hydrolase OS=Mus musculus GN=Usp5 PE=2 SV=1                                        | Q3U4W8_MOUSE (+1) | 93 kDa  | 1 | 3 | 3 | 6 | 3 | 3 | 6 | 6 | 3 | 3 | 6 | 3 | 3 |
| 60S ribosomal protein L14 OS=Mus musculus GN=Rpl14 PE=2 SV=3                                                   | RL14_MOUSE        | 24 kDa  | 1 | 3 | 0 | 0 | 0 | 3 | 0 | 0 | 0 | 3 | 0 | 0 | 3 |
| Saccharopine dehydrogenase-like oxidoreductase OS=Mus musculus GN=Scppdh PE=2 SV=1                             | SCPPDL_MOUSE      | 47 kDa  | 1 | 3 | 4 | 4 | 4 | 3 | 4 | 4 | 4 | 3 | 4 | 4 | 3 |
| Cluster of RNA-binding motif protein, X chromosome OS=Mus musculus GN=Rbmx PE=RBMX_MOUSE [2]                   |                   | 42 kDa  | 1 | 0 | 0 | 3 | 3 | 0 | 3 | 3 | 3 | 0 | 3 | 3 | 0 |
| E3 ubiquitin-protein ligase HUWE1 OS=Mus musculus GN=Huwe1 PE=2 SV=1                                           | A2AFQ0_MOUSE (+1) | 483 kDa | 1 | 0 | 0 | 4 | 0 | 4 | 4 | 0 | 0 | 4 | 0 | 4 | 0 |
| Epiplakin OS=Mus musculus GN=Eppk1 PE=1 SV=2                                                                   | EPIPL_MOUSE       | 725 kDa | 1 | 2 | 0 | 0 | 0 | 2 | 0 | 0 | 0 | 2 | 0 | 0 | 2 |
| Cluster of Protein Gm20459 (Fragment) OS=Mus musculus GN=Gm20459 PE=4 SV=1                                     | F7AA26_MOUSE      | 126 kDa | 1 | 0 | 0 | 3 | 0 | 0 | 3 | 3 | 0 | 0 | 3 | 0 | 0 |
| Fermitin family homolog 2 OS=Mus musculus GN=Fermt2 PE=1 SV=1                                                  | FERMT2_MOUSE      | 78 kDa  | 1 | 0 | 5 | 7 | 5 | 0 | 7 | 7 | 5 | 0 | 7 | 5 | 0 |
| Peptidyl-prolyl cis-trans isomerase FKBP3 OS=Mus musculus GN=Fkbp3 PE=1 SV=2                                   | FKBP3_MOUSE       | 25 kDa  | 1 | 7 | 0 | 6 | 0 | 7 | 6 | 6 | 0 | 7 | 6 | 0 | 7 |
| Heat shock protein beta-8 OS=Mus musculus GN=Hspb8 PE=1 SV=1                                                   | HSPB8_MOUSE       | 22 kDa  | 1 | 3 | 4 | 5 | 4 | 3 | 5 | 5 | 4 | 3 | 5 | 4 | 3 |
| Methionine-R-sulfoxide reductase B2, mitochondrial OS=Mus musculus GN=Msrb2 PE=MSRB2_MOUSE                     |                   | 19 kDa  | 1 | 4 | 6 | 4 | 6 | 4 | 6 | 6 | 4 | 4 | 6 | 4 | 4 |
| Methylthioribulose-1-phosphate dehydratase OS=Mus musculus GN=Apip PE=1 SV=1                                   | MTNB_MOUSE        | 27 kDa  | 1 | 0 | 6 | 5 | 6 | 0 | 5 | 5 | 6 | 0 | 5 | 6 | 0 |
| Neutral cholesterol ester hydrolase 1 OS=Mus musculus GN=Nceh1 PE=1 SV=1                                       | NCEH1_MOUSE       | 46 kDa  | 1 | 4 | 0 | 5 | 0 | 4 | 5 | 5 | 0 | 4 | 5 | 0 | 4 |
| Cytochrome b-c1 complex subunit 9 OS=Mus musculus GN=Uqcrl0 PE=1 SV=1                                          | QCR9_MOUSE        | 7 kDa   | 1 | 0 | 0 | 4 | 0 | 0 | 4 | 4 | 0 | 0 | 4 | 0 | 0 |
| 60S ribosomal protein L28 OS=Mus musculus GN=Rpl28 PE=1 SV=2                                                   | RL28_MOUSE        | 16 kDa  | 1 | 4 | 0 | 3 | 0 | 4 | 3 | 3 | 0 | 4 | 3 | 0 | 4 |
| 60S acidic ribosomal protein P2 OS=Mus musculus GN=Rplp2 PE=1 SV=3                                             | RLA2_MOUSE        | 12 kDa  | 1 | 5 | 4 | 0 | 4 | 5 | 0 | 0 | 4 | 5 | 0 | 4 | 5 |
| Sepiapterin reductase OS=Mus musculus GN=Spr PE=1 SV=1                                                         | SPRE_MOUSE        | 28 kDa  | 1 | 6 | 9 | 7 | 9 | 6 | 7 | 7 | 9 | 6 | 7 | 9 | 6 |
| Mitochondrial import inner membrane translocase subunit Tim9 OS=Mus musculus GN=TIM9_MOUSE                     |                   | 10 kDa  | 1 | 5 | 5 | 6 | 5 | 5 | 6 | 6 | 5 | 5 | 6 | 5 | 5 |
| DNA topoisomerase 2-binding protein 1 OS=Mus musculus GN=Topbp1 PE=1 SV=2                                      | TOPB1_MOUSE       | 169 kDa | 1 | 3 | 0 | 0 | 0 | 3 | 0 | 0 | 0 | 3 | 0 | 0 | 3 |
| Hsp90 co-chaperone Cdc37 OS=Mus musculus GN=Cdc37 PE=2 SV=1                                                    | CDC37_MOUSE       | 45 kDa  | 1 | 3 | 3 | 4 | 3 | 3 | 4 | 4 | 3 | 3 | 4 | 3 | 3 |
| Collagen alpha-1(VI) chain OS=Mus musculus GN=Col6a1 PE=2 SV=1                                                 | CO6A1_MOUSE       | 108 kDa | 1 | 4 | 0 | 0 | 0 | 4 | 0 | 0 | 0 | 4 | 0 | 0 | 4 |
| Catenin alpha-3 OS=Mus musculus GN=Ctnna3 PE=1 SV=2                                                            | CTNA3_MOUSE       | 100 kDa | 1 | 3 | 6 | 5 | 6 | 3 | 5 | 5 | 6 | 3 | 5 | 6 | 3 |
| Dnaj homolog subfamily A member 4 OS=Mus musculus GN=Dnaj4 PE=2 SV=1                                           | DNJA4_MOUSE       | 45 kDa  | 1 | 3 | 7 | 5 | 7 | 3 | 5 | 5 | 7 | 3 | 5 | 7 | 3 |
| Ubiquitin carboxyl-terminal hydrolase OS=Mus musculus GN=Usp14 PE=2 SV=1                                       | E9PNY8_MOUSE (+1) | 52 kDa  | 1 | 0 | 4 | 4 | 4 | 0 | 4 | 4 | 0 | 4 | 4 | 0 | 4 |
| Protein phosphatase 1 regulatory subunit 7 OS=Mus musculus GN=Ppp1r7 PE=1 SV=2                                 | PP1R7_MOUSE       | 41 kDa  | 1 | 0 | 3 | 0 | 3 | 0 | 0 | 0 | 3 | 0 | 0 | 3 | 0 |
| Peptidyl-prolyl cis-trans isomerase D OS=Mus musculus GN=Ppid PE=1 SV=3                                        | PPID_MOUSE        | 41 kDa  | 1 | 3 | 4 | 2 | 4 | 3 | 2 | 2 | 4 | 3 | 2 | 4 | 3 |
| Protein phosphatase 1 regulatory subunit 3A OS=Mus musculus GN=Ppp1r3a PE=1 SV=1                               | PPR3A_MOUSE       | 121 kDa | 1 | 4 | 5 | 5 | 5 | 4 | 5 | 5 | 5 | 4 | 5 | 5 | 4 |

|                                                                                                    |                  |         |   |   |   |   |   |   |   |   |   |   |   |   |   |
|----------------------------------------------------------------------------------------------------|------------------|---------|---|---|---|---|---|---|---|---|---|---|---|---|---|
| Proteasome subunit alpha type-4 OS=Mus musculus GN=Psm4 PE=1 SV=1                                  | PSA4_MOUSE       | 29 kDa  | 1 | 3 | 0 | 4 | 0 | 3 | 4 | 4 | 0 | 3 | 4 | 0 | 3 |
| MCG49183 OS=Mus musculus GN=1700009N14Rik PE=2 SV=1                                                | Q14AA6_MOUSE     | 24 kDa  | 1 | 4 | 6 | 4 | 6 | 4 | 4 | 4 | 6 | 4 | 4 | 6 | 4 |
| 39S ribosomal protein L12, mitochondrial OS=Mus musculus GN=Mrp12 PE=1 SV=2                        | RM12_MOUSE       | 22 kDa  | 1 | 3 | 7 | 7 | 7 | 7 | 7 | 7 | 7 | 7 | 7 | 7 | 7 |
| 40S ribosomal protein S10 OS=Mus musculus GN=Rps10 PE=1 SV=1                                       | RS10_MOUSE       | 19 kDa  | 1 | 5 | 3 | 0 | 3 | 5 | 0 | 0 | 3 | 5 | 0 | 3 | 5 |
| Mitochondrial import inner membrane translocase subunit Tim10 OS=Mus musculus (TIM10_MOUSE         | TIM10_MOUSE      | 10 kDa  | 1 | 6 | 4 | 3 | 4 | 6 | 3 | 3 | 4 | 6 | 3 | 4 | 6 |
| Cluster of Alcohol dehydrogenase class-3 OS=Mus musculus GN=Adh5 PE=1 SV=3 (AD_ADHX_MOUSE          | ADHX_MOUSE       | 40 kDa  | 1 | 0 | 5 | 4 | 5 | 0 | 4 | 4 | 5 | 0 | 4 | 5 | 0 |
| Cluster of Uncharacterized protein C6orf203 homolog OS=Mus musculus PE=1 SV=1 (C6orf203_MOUSE      | C6orf203_MOUSE   | 28 kDa  | 1 | 0 | 3 | 0 | 3 | 0 | 0 | 0 | 3 | 0 | 0 | 3 | 0 |
| Cluster of CLIP-associating protein 1 OS=Mus musculus GN=Clasp1 PE=1 SV=2 (CLAP1_CLAP1_MOUSE [4]   | CLAP1_MOUSE      | 169 kDa | 1 | 0 | 0 | 3 | 0 | 0 | 3 | 3 | 0 | 0 | 3 | 0 | 0 |
| A-kinase anchor protein 12 OS=Mus musculus GN=Akap12 PE=1 SV=1                                     | AKA12_MOUSE      | 181 kDa | 1 | 0 | 3 | 0 | 3 | 0 | 0 | 0 | 3 | 0 | 0 | 3 | 0 |
| ATP synthase subunit g, mitochondrial OS=Mus musculus GN=Atp5l PE=1 SV=1                           | ATP5L_MOUSE      | 11 kDa  | 1 | 5 | 0 | 0 | 0 | 5 | 0 | 0 | 0 | 5 | 0 | 0 | 5 |
| Hexaprenyldihydroxybenzoate methyltransferase, mitochondrial OS=Mus musculus G COQ3_MOUSE          | COQ3_MOUSE       | 41 kDa  | 1 | 6 | 6 | 4 | 6 | 6 | 4 | 4 | 6 | 6 | 4 | 6 | 6 |
| Guanine nucleotide-binding protein subunit beta-2-like 1 OS=Mus musculus GN=Gnb2;GBLP_MOUSE        | GBLP_MOUSE       | 35 kDa  | 1 | 0 | 4 | 3 | 4 | 0 | 3 | 3 | 4 | 0 | 3 | 4 | 0 |
| Heterogeneous nuclear ribonucleoproteins C1/C2 OS=Mus musculus GN=Hnrnpc PE=:HNRPC_MOUSE           | HNRPC_MOUSE      | 34 kDa  | 1 | 6 | 3 | 3 | 3 | 6 | 3 | 3 | 3 | 6 | 3 | 3 | 6 |
| Heat shock protein beta-7 OS=Mus musculus GN=Hspb7 PE=1 SV=3                                       | HSPB7_MOUSE      | 19 kDa  | 1 | 3 | 8 | 7 | 8 | 3 | 7 | 7 | 8 | 3 | 7 | 8 | 3 |
| Cluster of LIM and SH3 domain protein 1 OS=Mus musculus GN=Lasp1 PE=1 SV=1 (LALASASP1_MOUSE        | LASP1_MOUSE      | 30 kDa  | 1 | 4 | 6 | 3 | 6 | 4 | 3 | 3 | 6 | 4 | 3 | 6 | 4 |
| Methyl-CpG-binding protein 2 OS=Mus musculus GN=Mecp2 PE=1 SV=1                                    | MECP2_MOUSE      | 52 kDa  | 1 | 0 | 0 | 3 | 0 | 0 | 3 | 3 | 0 | 0 | 3 | 0 | 0 |
| Mitochondrial-processing peptidase subunit alpha OS=Mus musculus GN=Pmpca PE=:MPPA_MOUSE           | MPPA_MOUSE       | 58 kDa  | 1 | 4 | 5 | 5 | 5 | 4 | 5 | 5 | 5 | 5 | 4 | 5 | 5 |
| Na(+)/H(+) exchange regulatory cofactor NHE-RF2 OS=Mus musculus GN=Slc9a3r2 PE: NHRF2_MOUSE        | NHRF2_MOUSE      | 37 kDa  | 1 | 4 | 5 | 4 | 5 | 4 | 4 | 4 | 5 | 4 | 4 | 5 | 4 |
| Perilipin-3 OS=Mus musculus GN=Plin3 PE=1 SV=1                                                     | PLIN3_MOUSE      | 47 kDa  | 1 | 0 | 4 | 5 | 4 | 0 | 5 | 5 | 4 | 0 | 5 | 4 | 0 |
| Polyribonucleotide nucleotidyltransferase 1, mitochondrial OS=Mus musculus GN=Pnp1;PNPT1_MOUSE     | PNPT1_MOUSE      | 86 kDa  | 1 | 3 | 0 | 4 | 0 | 3 | 4 | 4 | 0 | 3 | 4 | 0 | 3 |
| 26S protease regulatory subunit 6B OS=Mus musculus GN=Psmc4 PE=1 SV=2                              | PRSB6_MOUSE      | 47 kDa  | 1 | 3 | 7 | 3 | 7 | 3 | 3 | 3 | 7 | 3 | 3 | 7 | 3 |
| 60S ribosomal protein L23 OS=Mus musculus GN=Rpl23 PE=1 SV=1                                       | RL23_MOUSE       | 15 kDa  | 1 | 3 | 6 | 6 | 6 | 3 | 6 | 6 | 6 | 6 | 6 | 6 | 6 |
| 60S ribosomal protein L35a OS=Mus musculus GN=Rpl35a PE=2 SV=2                                     | RL35A_MOUSE      | 13 kDa  | 1 | 3 | 5 | 0 | 5 | 3 | 0 | 0 | 5 | 3 | 0 | 5 | 3 |
| Cluster of Septin-11 OS=Mus musculus GN=Sept11 PE=1 SV=4 (SEP11_MOUSE)                             | SEP11_MOUSE [6]  | 50 kDa  | 1 | 3 | 3 | 2 | 3 | 3 | 2 | 2 | 3 | 3 | 2 | 3 | 3 |
| Sulfite oxidase, mitochondrial OS=Mus musculus GN=Suox PE=1 SV=2                                   | SUOX_MOUSE       | 61 kDa  | 1 | 4 | 3 | 4 | 3 | 4 | 4 | 4 | 3 | 4 | 4 | 3 | 4 |
| Lysine-tRNA ligase OS=Mus musculus GN=Kars PE=1 SV=1                                               | SYK_MOUSE        | 68 kDa  | 1 | 3 | 5 | 4 | 5 | 3 | 4 | 4 | 5 | 3 | 4 | 5 | 3 |
| Telethonin OS=Mus musculus GN=Tcap PE=2 SV=1                                                       | TEL_MOUSE        | 19 kDa  | 1 | 5 | 7 | 6 | 5 | 7 | 7 | 7 | 6 | 5 | 7 | 6 | 5 |
| Cluster of Heterogeneous nuclear ribonucleoprotein A3 OS=Mus musculus GN=Hnrnp A2AL12_MOUSE        | A2AL12_MOUSE     | 34 kDa  | 1 | 2 | 5 | 8 | 5 | 8 | 8 | 8 | 5 | 2 | 8 | 5 | 2 |
| Cluster of Isobutyryl-CoA dehydrogenase, mitochondrial OS=Mus musculus GN=Acad4;D3YTT4_MOUSE [2]   | D3YTT4_MOUSE [2] | 45 kDa  | 1 | 0 | 6 | 8 | 6 | 0 | 8 | 8 | 6 | 0 | 8 | 6 | 0 |
| Cysteine-rich protein 1 OS=Mus musculus GN=Crip1 PE=2 SV=2                                         | CRIP1_MOUSE      | 9 kDa   | 1 | 0 | 0 | 4 | 0 | 4 | 4 | 4 | 0 | 4 | 0 | 4 | 0 |
| Cytoplasmic dynein 1 light intermediate chain 1 OS=Mus musculus GN=Dync1li1 PE=1 SV=1 (DC1L1_MOUSE | DC1L1_MOUSE      | 11 kDa  | 1 | 0 | 3 | 0 | 3 | 0 | 0 | 0 | 3 | 0 | 0 | 3 | 0 |
| Protein-L-isoaspartate O-methyltransferase OS=Mus musculus GN=Pcmt1 PE=2 SV=1                      | EOCV0_MOUSE      | 30 kDa  | 1 | 0 | 6 | 6 | 6 | 0 | 6 | 6 | 6 | 0 | 6 | 6 | 0 |
| Glutaredoxin-3 OS=Mus musculus GN=Glxr3 PE=1 SV=1                                                  | GLRX3_MOUSE      | 38 kDa  | 1 | 3 | 6 | 3 | 6 | 3 | 3 | 3 | 6 | 3 | 3 | 6 | 3 |
| Histidine triad nucleotide-binding protein 1 OS=Mus musculus GN=Hint1 PE=1 SV=3                    | HINT1_MOUSE      | 14 kDa  | 1 | 3 | 0 | 4 | 0 | 3 | 4 | 4 | 0 | 3 | 4 | 0 | 3 |
| Monocarboxylate transporter 1 OS=Mus musculus GN=Slc16a1 PE=1 SV=1                                 | MOT1_MOUSE       | 53 kDa  | 1 | 0 | 5 | 4 | 5 | 0 | 4 | 4 | 5 | 0 | 4 | 5 | 0 |
| Myopalladin OS=Mus musculus GN=Mypn PE=2 SV=2                                                      | MYPN_MOUSE       | 144 kDa | 1 | 0 | 4 | 0 | 4 | 0 | 0 | 0 | 4 | 0 | 0 | 4 | 0 |
| Programmed cell death protein 5 OS=Mus musculus GN=Pcd5 PE=1 SV=3                                  | PDCD5_MOUSE      | 14 kDa  | 1 | 5 | 3 | 4 | 3 | 5 | 4 | 4 | 3 | 5 | 4 | 3 | 5 |
| Bisphosphoglycerate mutase OS=Mus musculus GN=Bpgm PE=2 SV=2                                       | PMGE_MOUSE       | 30 kDa  | 1 | 0 | 5 | 4 | 5 | 0 | 4 | 4 | 5 | 0 | 4 | 5 | 0 |
| Rab11 family-interacting protein 5 OS=Mus musculus GN=Rab11fp5 PE=1 SV=2                           | RFIP5_MOUSE      | 70 kDa  | 1 | 0 | 3 | 0 | 3 | 0 | 0 | 0 | 3 | 0 | 0 | 3 | 0 |
| Cluster of 60S ribosomal protein L18a OS=Mus musculus GN=Rpl18a PE=1 SV=1 (RL18_MOUSE)             | RL18_MOUSE       | 21 kDa  | 1 | 3 | 0 | 5 | 0 | 3 | 5 | 5 | 0 | 3 | 5 | 0 | 3 |
| 40S ribosomal protein S13 OS=Mus musculus GN=Rps13 PE=1 SV=2                                       | RS13_MOUSE       | 17 kDa  | 1 | 0 | 3 | 3 | 3 | 0 | 3 | 3 | 3 | 0 | 3 | 3 | 0 |
| 40S ribosomal protein S14 OS=Mus musculus GN=Rps14 PE=2 SV=3                                       | RS14_MOUSE       | 16 kDa  | 1 | 0 | 3 | 3 | 3 | 0 | 3 | 3 | 3 | 0 | 3 | 3 | 0 |
| 40S ribosomal protein S19 OS=Mus musculus GN=Rps19 PE=1 SV=3                                       | RS19_MOUSE       | 16 kDa  | 1 | 3 | 3 | 3 | 3 | 3 | 3 | 3 | 3 | 3 | 3 | 3 | 3 |
| Glycine-tRNA ligase OS=Mus musculus GN=Gars PE=1 SV=1                                              | SYG_MOUSE        | 82 kDa  | 1 | 3 | 4 | 4 | 4 | 3 | 4 | 4 | 4 | 3 | 4 | 4 | 3 |
| Translationally-controlled tumor protein OS=Mus musculus GN=Tpt1 PE=1 SV=1                         | TCTP_MOUSE       | 19 kDa  | 1 | 4 | 3 | 0 | 3 | 4 | 0 | 0 | 3 | 4 | 0 | 3 | 4 |
| 40S ribosomal protein S24 OS=Mus musculus GN=Rps24 PE=1 SV=1                                       | RS24_MOUSE (+2)  | 15 kDa  | 1 | 0 | 3 | 3 | 3 | 0 | 3 | 3 | 3 | 0 | 3 | 3 | 0 |
| Cluster of AP-2 complex subunit beta OS=Mus musculus GN=Ap2b1 PE=1 SV=1 (AP2B_MOUSE)               | AP2B_MOUSE [5]   | 105 kDa | 1 | 0 | 4 | 0 | 4 | 0 | 0 | 0 | 4 | 0 | 0 | 4 | 0 |
| Cluster of MCG19772 OS=Mus musculus GN=Trim55 PE=4 SV=1 (G3X8Y1_MOUSE)                             | G3X8Y1_MOUSE [3] | 60 kDa  | 1 | 0 | 0 | 6 | 0 | 0 | 6 | 6 | 0 | 0 | 6 | 0 | 0 |
| Cluster of Protein 4.1 OS=Mus musculus GN=Epb41 PE=1 SV=2 (41_MOUSE)                               | 41_MOUSE [3]     | 96 kDa  | 1 | 0 | 3 | 5 | 3 | 0 | 5 | 5 | 3 | 0 | 5 | 3 | 0 |
| Cluster of S-phase kinase-associated protein 1 OS=Mus musculus GN=Skep1 PE=1 SV=3 (SKP1_MOUSE)     | SKP1_MOUSE [2]   | 19 kDa  | 1 | 5 | 3 | 0 | 3 | 5 | 0 | 0 | 3 | 5 | 0 | 3 | 5 |
| Alpha-1-syntrophin OS=Mus musculus GN=Snta1 PE=2 SV=1                                              | AZAKD7_MOUSE     | 53 kDa  | 1 | 0 | 3 | 4 | 3 | 0 | 4 | 4 | 3 | 0 | 4 | 3 | 0 |
| Apolipoprotein O-like OS=Mus musculus GN=Apool PE=2 SV=1                                           | APOOL_MOUSE      | 29 kDa  | 1 | 0 | 0 | 6 | 0 | 0 | 6 | 6 | 0 | 0 | 6 | 0 | 0 |
| Bcl-2-like protein 13 OS=Mus musculus GN=Bcl2l13 PE=1 SV=2                                         | B2L13_MOUSE      | 47 kDa  | 1 | 5 | 5 | 0 | 5 | 5 | 0 | 0 | 5 | 5 | 0 | 5 | 5 |
| Adenylyl cyclase-associated protein 2 OS=Mus musculus GN=Cap2 PE=1 SV=1                            | CAP2_MOUSE (+1)  | 53 kDa  | 1 | 3 | 6 | 5 | 6 | 3 | 5 | 5 | 6 | 3 | 5 | 6 | 3 |
| Cathepsin B OS=Mus musculus GN=Ctsb PE=1 SV=2                                                      | CATB_MOUSE       | 37 kDa  | 1 | 4 | 5 | 0 | 5 | 4 | 0 | 0 | 5 | 4 | 0 | 5 | 4 |
| Collagen alpha-1(I) chain OS=Mus musculus GN=Col1a1 PE=1 SV=4                                      | CO1A1_MOUSE      | 138 kDa | 1 | 0 | 3 | 0 | 3 | 0 | 0 | 0 | 3 | 0 | 0 | 3 | 0 |
| 2-methoxy-6-polypropenyl-1,4-benzoquinol methylase, mitochondrial OS=Mus musculus COO5_MOUSE       | COO5_MOUSE       | 37 kDa  | 1 | 7 | 6 | 4 | 6 | 7 | 4 | 4 | 6 | 7 | 4 | 6 | 7 |
| CapZ-interacting protein OS=Mus musculus GN=Rcsd1 PE=2 SV=1                                        | CPZIP_MOUSE      | 44 kDa  | 1 | 0 | 5 | 6 | 5 | 0 | 6 | 6 | 5 | 0 | 6 | 5 | 0 |
| Dynactin subunit 1 OS=Mus musculus GN=Dctn1 PE=1 SV=3                                              | DCTN1_MOUSE      | 142 kDa | 1 | 0 | 0 | 3 | 0 | 0 | 3 | 3 | 0 | 0 | 3 | 0 | 0 |
| Probable rRNA-processing protein EBP2 OS=Mus musculus GN=Ebna1bp2 PE=2 SV=1                        | EBP2_MOUSE       | 35 kDa  | 1 | 4 | 0 | 0 | 0 | 4 | 0 | 0 | 4 | 0 | 0 | 4 | 0 |
| Glyoxylate reductase/hydroxypropylate reductase OS=Mus musculus GN=Grhpr PE=1 SV=1 (GRHPR_MOUSE    | GRHPR_MOUSE      | 35 kDa  | 1 | 4 | 4 | 0 | 4 | 4 | 0 | 0 | 4 | 4 | 0 | 4 | 4 |
| Kynurenine--oxoglutarate transaminase 3 OS=Mus musculus GN=Ccbl2 PE=1 SV=1                         | KAT3_MOUSE       | 51 kDa  | 1 | 3 | 0 | 3 | 0 | 3 | 3 | 3 | 0 | 3 | 3 | 0 | 3 |
| NADP-dependent malic enzyme OS=Mus musculus GN=Me1 PE=1 SV=2                                       | MAOX_MOUSE       | 64 kDa  | 1 | 3 | 5 | 5 | 5 | 3 | 5 | 5 | 5 | 3 | 5 | 5 | 3 |
| Endonuclease G, mitochondrial OS=Mus musculus GN=Endog PE=2 SV=1                                   | NUCG_MOUSE       | 32 kDa  | 1 | 0 | 5 | 4 | 5 | 0 | 4 | 4 | 5 | 0 | 4 | 5 | 0 |
| Cluster of Oxidoreductase NAD-binding domain-containing protein 1 OS=Mus musculus OXND1_MOUSE      | OXND1_MOUSE      | 35 kDa  | 1 | 0 | 4 | 4 | 4 | 0 | 4 | 4 | 4 | 0 | 4 | 4 | 0 |
| [Pyruvate dehydrogenase [lipoamide]] kinase isozyme 1, mitochondrial OS=Mus musculus PDK1_MOUSE    | PDK1_MOUSE       | 49 kDa  | 1 | 5 | 0 | 0 | 0 | 5 | 0 | 0 | 0 | 5 | 0 | 0 | 5 |

|                                                                                                      |                   |         |   |   |   |   |   |   |   |   |   |   |   |   |   |
|------------------------------------------------------------------------------------------------------|-------------------|---------|---|---|---|---|---|---|---|---|---|---|---|---|---|
| Peptidyl-prolyl cis-trans isomerase B OS=Mus musculus GN=Ppib PE=2 SV=2                              | PPIB_MOUSE        | 24 kDa  | 1 | 5 | 5 | 4 | 5 | 5 | 4 | 4 | 5 | 5 | 4 | 5 | 5 |
| Presequence protease, mitochondrial OS=Mus musculus GN=Pitrm1 PE=2 SV=1                              | PREP_MOUSE (+1)   | 117 kDa | 1 | 0 | 4 | 4 | 4 | 0 | 4 | 4 | 4 | 0 | 4 | 4 | 0 |
| 26S proteasome non-ATPase regulatory subunit 3 OS=Mus musculus GN=PsmD3 PE=1                         | PSMD3_MOUSE       | 61 kDa  | 1 | 0 | 3 | 3 | 3 | 0 | 3 | 3 | 3 | 0 | 3 | 3 | 0 |
| Protein Prob1 (Fragment) OS=Mus musculus GN=Prob1 PE=2 SV=1                                          | Q3UKG2_MOUSE      | 106 kDa | 1 | 0 | 4 | 3 | 4 | 0 | 3 | 3 | 4 | 0 | 3 | 4 | 0 |
| 60S ribosomal protein L18 OS=Mus musculus GN=Rpl18 PE=2 SV=3                                         | RL18_MOUSE        | 22 kDa  | 1 | 3 | 5 | 5 | 5 | 3 | 5 | 5 | 5 | 3 | 5 | 5 | 3 |
| Heterogeneous nuclear ribonucleoprotein A/B OS=Mus musculus GN=Hnrrnpab PE=1                         | ROAA_MOUSE        | 31 kDa  | 1 | 0 | 4 | 3 | 4 | 0 | 3 | 3 | 4 | 0 | 3 | 4 | 0 |
| 28S ribosomal protein S36, mitochondrial OS=Mus musculus GN=Mrps36 PE=1 SV=1                         | RT36_MOUSE        | 11 kDa  | 1 | 7 | 4 | 4 | 4 | 7 | 4 | 4 | 4 | 7 | 4 | 4 | 7 |
| Transgelin-2 OS=Mus musculus GN=Tagln2 PE=1 SV=4                                                     | TAGL2_MOUSE       | 22 kDa  | 1 | 0 | 5 | 5 | 5 | 0 | 5 | 5 | 5 | 0 | 5 | 5 | 0 |
| Vesicle-associated membrane protein-associated protein A OS=Mus musculus GN=Va1VAPA_MOUSE            | VAPA_MOUSE        | 28 kDa  | 1 | 0 | 4 | 3 | 4 | 0 | 3 | 3 | 4 | 0 | 3 | 4 | 0 |
| Vacuolar protein sorting-associated protein 35 OS=Mus musculus GN=Vps35 PE=1 SV=1                    | VPS35_MOUSE       | 92 kDa  | 1 | 6 | 4 | 4 | 4 | 6 | 4 | 4 | 4 | 6 | 4 | 4 | 6 |
| Zyxin OS=Mus musculus GN=Zyx PE=1 SV=2                                                               | ZYX_MOUSE         | 61 kDa  | 1 | 0 | 6 | 4 | 6 | 0 | 4 | 4 | 6 | 0 | 4 | 6 | 0 |
| Serine/threonine-protein kinase mTOR OS=Mus musculus GN=Mtor PE=1 SV=2                               | MTOR_MOUSE        | 289 kDa | 1 | 3 | 0 | 0 | 0 | 3 | 0 | 0 | 0 | 3 | 0 | 0 | 3 |
| Reticulon-4-interacting protein 1, mitochondrial OS=Mus musculus GN=Rtn4ip1 PE=1                     | RT41_MOUSE        | 43 kDa  | 1 | 4 | 3 | 3 | 3 | 4 | 3 | 3 | 3 | 4 | 3 | 3 | 4 |
| Fatty acid-binding protein, epidermal OS=Mus musculus GN=Fabp5 PE=1 SV=3                             | FABP5_MOUSE       | 15 kDa  | 1 | 0 | 4 | 0 | 4 | 0 | 0 | 0 | 4 | 0 | 0 | 4 | 0 |
| Cluster of ADP-ribosylation factor 3 OS=Mus musculus GN=Arf3 PE=2 SV=2 (ARF3_MOUSE)                  | ARF3_MOUSE        | 21 kDa  | 1 | 0 | 0 | 4 | 0 | 4 | 0 | 4 | 0 | 0 | 4 | 0 | 0 |
| Cluster of Protein Zim1 OS=Mus musculus GN=Zim1 PE=2 SV=1 (Q8C393_MOUSE)                             | Q8C393_MOUSE      | 65 kDa  | 1 | 3 | 0 | 0 | 0 | 3 | 0 | 0 | 0 | 3 | 0 | 0 | 3 |
| Alcohol dehydrogenase [NADP(+)] OS=Mus musculus GN=Akr1a1 PE=1 SV=3                                  | AK1A1_MOUSE       | 37 kDa  | 1 | 5 | 5 | 0 | 5 | 5 | 0 | 0 | 5 | 5 | 0 | 5 | 5 |
| Annexin A7 OS=Mus musculus GN=Anxa7 PE=2 SV=2                                                        | ANXA7_MOUSE       | 50 kDa  | 1 | 0 | 4 | 5 | 4 | 0 | 5 | 5 | 4 | 0 | 5 | 4 | 0 |
| Aflatoxin B1 aldehyde reductase member 2 OS=Mus musculus GN=Akr7a2 PE=1 SV=3                         | ARK72_MOUSE       | 41 kDa  | 1 | 0 | 7 | 3 | 7 | 0 | 3 | 3 | 7 | 0 | 3 | 7 | 0 |
| Cellular nucleic acid-binding protein OS=Mus musculus GN=Cnbp PE=2 SV=2                              | CNBP_MOUSE        | 20 kDa  | 1 | 0 | 5 | 6 | 5 | 0 | 6 | 6 | 5 | 0 | 6 | 5 | 0 |
| Cluster of Anamorsin OS=Mus musculus GN=Ciapi1 PE=1 SV=1 (CPIN1_MOUSE)                               | CPIN1_MOUSE [2]   | 33 kDa  | 1 | 3 | 4 | 0 | 4 | 3 | 0 | 0 | 4 | 3 | 0 | 4 | 3 |
| Peroxisomal multifunctional enzyme type 2 OS=Mus musculus GN=Hsd17b4 PE=1 SV=1                       | DHB4_MOUSE        | 79 kDa  | 1 | 0 | 0 | 0 | 3 | 0 | 0 | 3 | 0 | 0 | 3 | 0 | 0 |
| Eukaryotic translation initiation factor 3 subunit J-A OS=Mus musculus GN=Eif3j1 PE=1                | E13J1_MOUSE (+1)  | 29 kDa  | 1 | 0 | 3 | 5 | 3 | 0 | 5 | 5 | 3 | 0 | 5 | 3 | 0 |
| Protein FAM136A OS=Mus musculus GN=Fam136a PE=1 SV=1                                                 | F136A_MOUSE       | 16 kDa  | 1 | 4 | 3 | 3 | 3 | 4 | 3 | 3 | 3 | 4 | 3 | 3 | 4 |
| Protocadherin Fat 4 OS=Mus musculus GN=Fat4 PE=1 SV=2                                                | FAT4_MOUSE        | 540 kDa | 1 | 3 | 0 | 0 | 0 | 3 | 0 | 0 | 0 | 3 | 0 | 0 | 3 |
| Acyl-protein thioesterase 1 OS=Mus musculus GN=Lyp1a1 PE=4 SV=1                                      | J3QP56_MOUSE (+1) | 24 kDa  | 1 | 3 | 4 | 0 | 4 | 3 | 0 | 0 | 4 | 3 | 0 | 4 | 3 |
| Adenylate kinase isoenzyme 4, mitochondrial OS=Mus musculus GN=Ak4 PE=2 SV=1                         | KAD4_MOUSE        | 25 kDa  | 1 | 6 | 5 | 3 | 5 | 6 | 3 | 3 | 5 | 6 | 3 | 5 | 6 |
| Leukotriene A-4 hydrolase OS=Mus musculus GN=Lta4h PE=1 SV=4                                         | LKHA4_MOUSE       | 69 kDa  | 1 | 3 | 7 | 6 | 7 | 3 | 6 | 6 | 7 | 3 | 6 | 7 | 3 |
| Protein Sptbn2 OS=Mus musculus GN=Sptbn2 PE=2 SV=1                                                   | Q68FG2_MOUSE      | 271 kDa | 1 | 0 | 0 | 0 | 0 | 0 | 0 | 0 | 0 | 0 | 0 | 0 | 0 |
| Ankyrin OS=Mus musculus GN=Rai14 PE=1 SV=1                                                           | RAI14_MOUSE       | 109 kDa | 1 | 3 | 0 | 0 | 0 | 3 | 0 | 0 | 0 | 3 | 0 | 0 | 3 |
| 60S ribosomal protein L37 OS=Mus musculus GN=Rpl37 PE=2 SV=3                                         | RL37_MOUSE        | 11 kDa  | 1 | 0 | 3 | 3 | 3 | 0 | 3 | 3 | 3 | 0 | 3 | 3 | 0 |
| 28S ribosomal protein S22, mitochondrial OS=Mus musculus GN=Mrps22 PE=2 SV=1                         | RT22_MOUSE        | 41 kDa  | 1 | 3 | 3 | 3 | 3 | 3 | 3 | 3 | 3 | 3 | 3 | 3 | 3 |
| Gamma-synuclein OS=Mus musculus GN=Sncg PE=1 SV=1                                                    | SYUG_MOUSE        | 13 kDa  | 1 | 3 | 0 | 4 | 0 | 3 | 4 | 4 | 0 | 3 | 4 | 0 | 3 |
| Cluster of Hydroxymethylglutaryl-CoA lyase, mitochondrial OS=Mus musculus GN=Hm1HMGCL_MOUSE          | HMGCL_MOUSE       | 34 kDa  | 1 | 4 | 4 | 0 | 4 | 4 | 0 | 4 | 4 | 0 | 4 | 4 | 4 |
| Myosin Vb, isoform CRA_a OS=Mus musculus GN=Myo5b PE=4 SV=1                                          | G3X9Y9_MOUSE (+2) | 213 kDa | 1 | 1 | 0 | 0 | 0 | 1 | 0 | 0 | 0 | 1 | 0 | 0 | 1 |
| Cluster of Tripeptidyl-peptidase 2 OS=Mus musculus GN=Tpp2 PE=2 SV=3 (TPP2_MOUSE)                    | TPP2_MOUSE        | 140 kDa | 1 | 3 | 3 | 0 | 3 | 3 | 0 | 0 | 3 | 3 | 0 | 3 | 3 |
| Cluster of Heat shock 70 kDa protein 12B OS=Mus musculus GN=Hspa12b PE=1 SV=1 (HS12B_MOUSE)          | HS12B_MOUSE       | 76 kDa  | 1 | 0 | 0 | 4 | 0 | 0 | 4 | 4 | 0 | 0 | 4 | 0 | 0 |
| Cluster of Cordon-bleu protein-like 1 OS=Mus musculus GN=Cobl1 PE=4 SV=1 (B1AZ1_B1AZ14_MOUSE [2])    | B1AZ1_MOUSE [2]   | 133 kDa | 1 | 0 | 0 | 3 | 0 | 0 | 3 | 3 | 0 | 0 | 3 | 0 | 0 |
| Proteasomal ubiquitin receptor ADRM1 OS=Mus musculus GN=Adrm1 PE=1 SV=2                              | ADRM1_MOUSE       | 42 kDa  | 1 | 0 | 5 | 6 | 5 | 0 | 6 | 6 | 5 | 0 | 6 | 5 | 0 |
| Afamin OS=Mus musculus GN=Afm PE=1 SV=2                                                              | AFAM_MOUSE        | 69 kDa  | 1 | 0 | 6 | 4 | 6 | 0 | 4 | 4 | 6 | 0 | 4 | 6 | 0 |
| Isoaspartyl peptidase/L-asparaginase OS=Mus musculus GN=Asrgl1 PE=1 SV=1                             | ASGL1_MOUSE       | 34 kDa  | 1 | 3 | 5 | 5 | 5 | 3 | 5 | 5 | 3 | 5 | 3 | 5 | 3 |
| C-1-tetrahydrofolate synthase, cytoplasmic OS=Mus musculus GN=Mthfd1 PE=1 SV=4                       | CLTC_MOUSE        | 101 kDa | 1 | 3 | 4 | 0 | 4 | 3 | 0 | 0 | 4 | 3 | 0 | 4 | 3 |
| UPF0598 protein C8orf82 homolog OS=Mus musculus PE=2 SV=1                                            | CH082_MOUSE       | 24 kDa  | 1 | 3 | 4 | 0 | 4 | 3 | 0 | 0 | 4 | 3 | 0 | 4 | 3 |
| Putative ATP-dependent Clp protease proteolytic subunit, mitochondrial OS=Mus musculus GN=CLPP_MOUSE | CLPP_MOUSE        | 30 kDa  | 1 | 0 | 4 | 3 | 4 | 0 | 3 | 3 | 4 | 0 | 3 | 4 | 0 |
| Dynactin subunit 2 OS=Mus musculus GN=Dctn2 PE=1 SV=3                                                | DCTN2_MOUSE       | 44 kDa  | 1 | 0 | 5 | 5 | 5 | 0 | 5 | 5 | 5 | 0 | 5 | 5 | 0 |
| Dnal homolog subfamily A member 3, mitochondrial OS=Mus musculus GN=Dnaja3 PIDNJA3_MOUSE             | PIDNJA3_MOUSE     | 52 kDa  | 1 | 0 | 3 | 3 | 3 | 0 | 3 | 3 | 3 | 0 | 3 | 3 | 0 |
| Dystrobrevin alpha OS=Mus musculus GN=Dtna PE=1 SV=2                                                 | DTNA_MOUSE        | 84 kDa  | 1 | 0 | 4 | 4 | 4 | 0 | 4 | 4 | 4 | 0 | 4 | 4 | 0 |
| Glycerol-3-phosphate dehydrogenase [NAD(+)], cytoplasmic OS=Mus musculus GN=GjGPDA_MOUSE             | GjGPDA_MOUSE      | 38 kDa  | 1 | 0 | 5 | 4 | 5 | 0 | 4 | 4 | 5 | 0 | 4 | 5 | 0 |
| Glutathione reductase, mitochondrial OS=Mus musculus GN=Gsr PE=2 SV=3                                | GSHR_MOUSE (+1)   | 54 kDa  | 1 | 0 | 0 | 3 | 0 | 0 | 3 | 3 | 0 | 0 | 3 | 0 | 0 |
| High mobility group protein HMG-1/HMG-1 OS=Mus musculus GN=Hmga1 PE=1 SV=4                           | HMGA1_MOUSE       | 12 kDa  | 1 | 4 | 4 | 5 | 4 | 4 | 5 | 5 | 4 | 4 | 5 | 4 | 4 |
| Protein Dnahc7b OS=Mus musculus GN=Dnahc7b PE=4 SV=1                                                 | L7N1Y0_MOUSE      | 467 kDa | 1 | 2 | 0 | 0 | 0 | 2 | 0 | 0 | 0 | 2 | 0 | 0 | 2 |
| NAD(P)H dehydrogenase [quinone] 1 OS=Mus musculus GN=Nqo1 PE=1 SV=3                                  | NQO1_MOUSE        | 31 kDa  | 1 | 3 | 7 | 4 | 7 | 3 | 4 | 4 | 7 | 3 | 4 | 7 | 3 |
| Prolyl endopeptidase OS=Mus musculus GN=Prep PE=2 SV=1                                               | PPCE_MOUSE        | 81 kDa  | 1 | 0 | 7 | 3 | 7 | 0 | 3 | 3 | 7 | 0 | 3 | 7 | 0 |
| Proline synthase co-transcribed bacterial homolog protein OS=Mus musculus GN=Pro PROSC_MOUSE         | PROSC_MOUSE       | 30 kDa  | 1 | 0 | 5 | 0 | 5 | 0 | 0 | 0 | 5 | 0 | 0 | 5 | 0 |
| Vesicle-associated membrane protein, associated protein B and C OS=Mus musculus GN=Q8BH80_MOUSE (+1) | Q8BH80_MOUSE (+1) | 27 kDa  | 1 | 4 | 2 | 4 | 2 | 4 | 4 | 4 | 2 | 4 | 4 | 2 | 4 |
| Cortactin, isoform CRA_a OS=Mus musculus GN=Cttn PE=2 SV=1                                           | Q921L6_MOUSE (+1) | 57 kDa  | 1 | 0 | 4 | 3 | 4 | 0 | 3 | 3 | 4 | 0 | 3 | 4 | 0 |
| 60S ribosomal protein L21 OS=Mus musculus GN=Rpl21 PE=2 SV=1                                         | Q9CQM8_MOUSE      | 19 kDa  | 1 | 0 | 0 | 3 | 0 | 0 | 3 | 3 | 0 | 0 | 3 | 0 | 0 |
| 60S ribosomal protein L26 OS=Mus musculus GN=Rpl26 PE=2 SV=1                                         | RL26_MOUSE        | 17 kDa  | 1 | 4 | 0 | 7 | 0 | 4 | 7 | 7 | 0 | 4 | 7 | 0 | 4 |
| 60S ribosomal protein L27a OS=Mus musculus GN=Rpl27a PE=2 SV=5                                       | RL27A_MOUSE       | 17 kDa  | 1 | 0 | 3 | 0 | 3 | 0 | 0 | 0 | 3 | 0 | 0 | 3 | 0 |
| 40S ribosomal protein S16 OS=Mus musculus GN=Rps16 PE=2 SV=4                                         | RS16_MOUSE        | 16 kDa  | 1 | 4 | 0 | 0 | 0 | 4 | 0 | 0 | 4 | 0 | 4 | 0 | 4 |
| Splicing factor, proline- and glutamine-rich OS=Mus musculus GN=Sfpq PE=1 SV=1                       | SFPQ_MOUSE        | 75 kDa  | 1 | 0 | 4 | 3 | 4 | 0 | 3 | 3 | 4 | 0 | 3 | 4 | 0 |
| Serine/arginine-rich splicing factor 7 OS=Mus musculus GN=Srsf7 PE=1 SV=1                            | SRSF7_MOUSE (+2)  | 31 kDa  | 1 | 3 | 3 | 0 | 3 | 3 | 0 | 0 | 3 | 3 | 0 | 3 | 3 |
| Ubiquitin-conjugating enzyme E2 L3 OS=Mus musculus GN=Ube2l3 PE=2 SV=1                               | UB2L3_MOUSE       | 18 kDa  | 1 | 4 | 5 | 4 | 5 | 4 | 5 | 5 | 4 | 4 | 5 | 4 | 4 |
| Cluster of 60S ribosomal protein L17 OS=Mus musculus GN=Rpl17 PE=2 SV=1 (Q6ZWZ_Q6ZWZ2_MOUSE)         | Q6ZWZ2_MOUSE      | 21 kDa  | 1 | 0 | 3 | 3 | 3 | 0 | 3 | 3 | 3 | 0 | 3 | 3 | 0 |
| Cluster of Collagen alpha-1(XV) chain OS=Mus musculus GN=Col15a1 PE=2 SV=1 (A2A_A2AJY2_MOUSE [3])    | A2AJY2_MOUSE [3]  | 138 kDa | 1 | 0 | 3 | 0 | 3 | 0 | 0 | 0 | 3 | 0 | 0 | 3 | 0 |
| Adiponectin OS=Mus musculus GN=Adipoq PE=1 SV=2                                                      | ADIPO_MOUSE       | 27 kDa  | 1 | 0 | 5 | 5 | 5 | 0 | 5 | 5 | 5 | 0 | 5 | 5 | 0 |

|                                                                                                           |                   |         |   |   |   |   |   |   |   |   |   |   |   |   |   |
|-----------------------------------------------------------------------------------------------------------|-------------------|---------|---|---|---|---|---|---|---|---|---|---|---|---|---|
| Cluster of Plastin-3 OS=Mus musculus GN=Pls3 PE=2 SV=1 (B1AX58_MOUSE)                                     | B1AX58_MOUSE [3]  | 72 kDa  | 1 | 0 | 3 | 3 | 3 | 0 | 3 | 3 | 3 | 0 | 3 | 3 | 0 |
| Valacyclovir hydrolase OS=Mus musculus GN=Bphl PE=2 SV=1                                                  | BPHL_MOUSE        | 33 kDa  | 1 | 0 | 0 | 4 | 0 | 0 | 4 | 4 | 0 | 0 | 4 | 0 | 0 |
| Cadherin-2 OS=Mus musculus GN=Cdh2 PE=1 SV=2                                                              | CADH2_MOUSE (+1)  | 100 kDa | 1 | 3 | 6 | 2 | 6 | 3 | 2 | 2 | 6 | 3 | 2 | 6 | 3 |
| Cullin-associated NEDD8-dissociated protein 1 OS=Mus musculus GN=Cand1 PE=2 SV=2                          | CAND1_MOUSE       | 136 kDa | 1 | 0 | 5 | 0 | 5 | 0 | 0 | 0 | 5 | 0 | 0 | 5 | 0 |
| Carbonyl reductase [NADPH] 1 OS=Mus musculus GN=Cbr1 PE=1 SV=3                                            | CBR1_MOUSE        | 31 kDa  | 1 | 0 | 0 | 3 | 0 | 0 | 3 | 3 | 0 | 0 | 3 | 0 | 0 |
| Cytochrome c oxidase subunit 7A-related protein, mitochondrial OS=Mus musculus GN=COX7R_MOUSE (+1)        | COX7R_MOUSE (+1)  | 12 kDa  | 1 | 0 | 4 | 4 | 4 | 0 | 4 | 4 | 4 | 0 | 4 | 4 | 0 |
| Catenin beta-1 OS=Mus musculus GN=Ctnnb1 PE=1 SV=1                                                        | CTNB1_MOUSE       | 85 kDa  | 1 | 2 | 3 | 5 | 3 | 2 | 5 | 5 | 3 | 2 | 5 | 3 | 2 |
| Microtubule-associated protein RP/EB family member 2 (Fragment) OS=Mus musculus GN=D3YK8_MOUSE (+2)       | D3YK8_MOUSE (+2)  | 29 kDa  | 1 | 4 | 3 | 5 | 3 | 4 | 5 | 5 | 3 | 4 | 5 | 3 | 4 |
| DNA damage-binding protein 1 OS=Mus musculus GN=Ddb1 PE=1 SV=2                                            | DDB1_MOUSE        | 127 kDa | 1 | 0 | 4 | 5 | 4 | 0 | 5 | 5 | 4 | 0 | 5 | 4 | 0 |
| Inter alpha-trypsin inhibitor, heavy chain 4 OS=Mus musculus GN=Ith4 PE=2 SV=1                            | E9PVD2_MOUSE (+2) | 105 kDa | 1 | 0 | 4 | 0 | 4 | 0 | 0 | 0 | 4 | 0 | 0 | 4 | 0 |
| 26S protease regulatory subunit 10B OS=Mus musculus GN=Psmc6 PE=1 SV=1                                    | PRS10_MOUSE       | 44 kDa  | 1 | 4 | 5 | 4 | 5 | 4 | 4 | 4 | 5 | 4 | 4 | 5 | 4 |
| 60S ribosomal protein L9 OS=Mus musculus GN=Rpl9 PE=2 SV=2                                                | RL9_MOUSE         | 22 kDa  | 1 | 0 | 4 | 2 | 4 | 0 | 2 | 2 | 4 | 0 | 2 | 4 | 0 |
| SRA stem-loop-interacting RNA-binding protein, mitochondrial OS=Mus musculus GN=SLIRP_MOUSE               | SLIRP_MOUSE       | 13 kDa  | 1 | 4 | 5 | 0 | 5 | 4 | 0 | 0 | 5 | 4 | 0 | 5 | 4 |
| Transmembrane protein 109 OS=Mus musculus GN=Tmem109 PE=1 SV=2                                            | TM109_MOUSE       | 26 kDa  | 1 | 0 | 4 | 0 | 4 | 0 | 0 | 0 | 4 | 0 | 0 | 4 | 0 |
| Tubulin polymerization-promoting protein family member 3 OS=Mus musculus GN=TPPP3_MOUSE                   | TPPP3_MOUSE       | 19 kDa  | 1 | 5 | 3 | 0 | 3 | 5 | 0 | 0 | 3 | 5 | 0 | 3 | 5 |
| Cluster of Hepatoma-derived growth factor OS=Mus musculus GN=HdGF PE=1 SV=2 (HHDGF_MOUSE [2])             | HHDGF_MOUSE [2]   | 26 kDa  | 1 | 2 | 4 | 5 | 4 | 2 | 5 | 5 | 4 | 2 | 5 | 4 | 2 |
| Alpha-2-antiplasmin OS=Mus musculus GN=Serpinf2 PE=1 SV=1                                                 | A2AP_MOUSE        | 55 kDa  | 1 | 5 | 0 | 3 | 0 | 5 | 3 | 3 | 0 | 5 | 3 | 0 | 5 |
| Apolipoprotein B-100 OS=Mus musculus GN=ApoB PE=1 SV=1                                                    | APOB_MOUSE        | 509 kDa | 1 | 3 | 0 | 0 | 0 | 3 | 0 | 0 | 0 | 3 | 0 | 0 | 3 |
| Tight junction protein ZO-1 OS=Mus musculus GN=Tjp1 PE=2 SV=1                                             | B9EHJ3_MOUSE      | 189 kDa | 1 | 0 | 4 | 0 | 4 | 0 | 0 | 0 | 4 | 0 | 0 | 4 | 0 |
| Filamin-binding LIM protein 1 OS=Mus musculus GN=Fblm1 PE=1 SV=2                                          | FBL1_MOUSE        | 41 kDa  | 1 | 4 | 4 | 0 | 4 | 0 | 0 | 0 | 4 | 4 | 0 | 4 | 4 |
| Inorganic pyrophosphatase OS=Mus musculus GN=Ppa1 PE=1 SV=1                                               | IPYR_MOUSE        | 33 kDa  | 1 | 3 | 3 | 3 | 3 | 3 | 3 | 3 | 3 | 3 | 3 | 3 | 3 |
| UMP-CMP kinase OS=Mus musculus GN=Cmpk1 PE=1 SV=1                                                         | KCY_MOUSE         | 22 kDa  | 1 | 4 | 0 | 0 | 0 | 4 | 0 | 0 | 0 | 4 | 0 | 0 | 4 |
| Proteasome subunit alpha type-6 OS=Mus musculus GN=PsmA6 PE=1 SV=1                                        | PSA6_MOUSE        | 27 kDa  | 1 | 3 | 4 | 3 | 4 | 3 | 3 | 3 | 4 | 3 | 3 | 4 | 3 |
| Protein Tfg OS=Mus musculus GN=Tfg PE=2 SV=1                                                              | Q9Z1A1_MOUSE      | 43 kDa  | 1 | 4 | 3 | 0 | 3 | 4 | 0 | 0 | 3 | 4 | 0 | 3 | 4 |
| Cluster of Isoform 2 of Dynamin 2 OS=Mus musculus GN=Dnm2 (sp P39054-2 DYN2_sp P39054-2 DYN2_MOUSE)?      | P39054-2_MOUSE    | 27 kDa  | 1 | 2 | 2 | 2 | 2 | 2 | 2 | 2 | 2 | 2 | 2 | 2 | 2 |
| Calycalin-binding protein OS=Mus musculus GN=Cacybp PE=1 SV=1                                             | CYBP_MOUSE        | 27 kDa  | 1 | 0 | 3 | 0 | 3 | 0 | 0 | 0 | 3 | 0 | 0 | 3 | 0 |
| Cluster of Integrin beta-1 OS=Mus musculus GN=Itgb1 PE=1 SV=1 (ITB1_MOUSE)                                | ITB1_MOUSE        | 88 kDa  | 1 | 0 | 0 | 4 | 0 | 0 | 0 | 0 | 4 | 0 | 0 | 4 | 0 |
| Cluster of Ig gamma-2B chain C region OS=Mus musculus GN=Igh-3 PE=1 SV=3 (IGG2B_IGG2B_MOUSE)              | IGG2B_MOUSE       | 44 kDa  | 1 | 0 | 3 | 6 | 3 | 0 | 6 | 6 | 3 | 0 | 6 | 3 | 0 |
| Cluster of Ribosomal protein L15 OS=Mus musculus GN=Gm10020 PE=3 SV=1 (E9QAZ:E9QAZ2_MOUSE [2])            | E9QAZ2_MOUSE [2]  | 24 kDa  | 1 | 3 | 4 | 0 | 4 | 3 | 0 | 0 | 4 | 3 | 0 | 4 | 3 |
| 6-phosphogluconate dehydrogenase, decarboxylating OS=Mus musculus GN=Pgd PE=6 PGD_MOUSE                   | PGD_MOUSE         | 53 kDa  | 1 | 0 | 3 | 4 | 3 | 0 | 4 | 4 | 3 | 0 | 4 | 3 | 0 |
| Annexin A11 OS=Mus musculus GN=Anxa11 PE=1 SV=2                                                           | ANX11_MOUSE       | 54 kDa  | 1 | 0 | 4 | 7 | 4 | 0 | 7 | 7 | 4 | 0 | 7 | 4 | 0 |
| Clusterin OS=Mus musculus GN=Clu PE=1 SV=1                                                                | CLUS_MOUSE        | 52 kDa  | 1 | 3 | 0 | 0 | 0 | 3 | 0 | 0 | 0 | 3 | 0 | 0 | 3 |
| Peptidyl-prolyl cis-trans isomerase FKBP4 OS=Mus musculus GN=Fkbp4 PE=1 SV=5                              | FKBP4_MOUSE       | 52 kDa  | 1 | 0 | 5 | 4 | 5 | 0 | 4 | 4 | 5 | 0 | 4 | 5 | 0 |
| FUN14 domain-containing protein 2 OS=Mus musculus GN=Fundc2 PE=2 SV=1                                     | FUND2_MOUSE       | 17 kDa  | 1 | 4 | 3 | 0 | 3 | 4 | 0 | 0 | 3 | 4 | 0 | 3 | 4 |
| Fragile X mental retardation syndrome-related protein 1 OS=Mus musculus GN=Fxr1 FXR1_MOUSE                | FXR1_MOUSE        | 76 kDa  | 1 | 2 | 0 | 0 | 0 | 2 | 0 | 0 | 0 | 2 | 0 | 0 | 2 |
| Ras GTPase-activating protein-binding protein 2 OS=Mus musculus GN=G3bp2 PE=1 S'G3BP2_MOUSE (+1)          | G3BP2_MOUSE (+1)  | 54 kDa  | 1 | 0 | 3 | 0 | 3 | 0 | 0 | 0 | 3 | 0 | 0 | 3 | 0 |
| Mimecan OS=Mus musculus GN=Ogn PE=2 SV=1                                                                  | MIME_MOUSE        | 34 kDa  | 1 | 0 | 3 | 3 | 3 | 0 | 3 | 3 | 3 | 0 | 3 | 3 | 0 |
| E3 ubiquitin-protein ligase NEDD4 OS=Mus musculus GN=Nedd4 PE=1 SV=3                                      | NEDD4_MOUSE       | 103 kDa | 1 | 2 | 0 | 0 | 0 | 2 | 0 | 0 | 0 | 2 | 0 | 0 | 2 |
| Protein kinase C and casein kinase substrate in neurons protein 2 OS=Mus musculus GN=CACN2_MOUSE          | CACN2_MOUSE       | 56 kDa  | 1 | 4 | 0 | 4 | 0 | 4 | 4 | 4 | 0 | 4 | 0 | 4 | 0 |
| Parathyroid hormone-related protein OS=Mus musculus GN=Pthrh PE=2 SV=3                                    | PTHRH_MOUSE       | 11 kDa  | 1 | 0 | 4 | 0 | 4 | 0 | 0 | 0 | 4 | 0 | 0 | 4 | 0 |
| Acp1 protein OS=Mus musculus GN=Acp1 PE=1 SV=1                                                            | Q561M1_MOUSE      | 18 kDa  | 1 | 0 | 4 | 0 | 4 | 0 | 0 | 0 | 4 | 0 | 0 | 4 | 0 |
| Ribonuclease inhibitor OS=Mus musculus GN=Rnh1 PE=1 SV=1                                                  | RINI_MOUSE        | 50 kDa  | 1 | 0 | 7 | 5 | 7 | 0 | 5 | 5 | 7 | 0 | 5 | 7 | 0 |
| Spartin OS=Mus musculus GN=Spg20 PE=2 SV=1                                                                | SPG20_MOUSE       | 73 kDa  | 1 | 0 | 4 | 0 | 4 | 0 | 0 | 0 | 4 | 0 | 0 | 4 | 0 |
| Slc8a1 protein OS=Mus musculus GN=Slc8a1 PE=2 SV=1                                                        | Q68F10_MOUSE      | 107 kDa | 1 | 0 | 3 | 0 | 3 | 0 | 0 | 0 | 3 | 0 | 0 | 3 | 0 |
| Glutathione peroxidase 3 OS=Mus musculus GN=Gpx3 PE=2 SV=2                                                | GPX3_MOUSE        | 25 kDa  | 1 | 0 | 0 | 3 | 0 | 0 | 3 | 3 | 0 | 0 | 3 | 0 | 0 |
| Microtubule-associated protein 6 OS=Mus musculus GN=Map6 PE=1 SV=2                                        | MAP6_MOUSE        | 96 kDa  | 1 | 3 | 0 | 0 | 0 | 3 | 0 | 0 | 0 | 3 | 0 | 0 | 3 |
| Sorting nexin 3 OS=Mus musculus GN=Snx3 PE=2 SV=1                                                         | Q78ZM0_MOUSE (+1) | 19 kDa  | 1 | 3 | 5 | 4 | 5 | 3 | 4 | 4 | 5 | 3 | 4 | 5 | 3 |
| 26S protease regulatory subunit 8 OS=Mus musculus GN=Psmc5 PE=1 SV=1                                      | PRS8_MOUSE        | 46 kDa  | 1 | 0 | 3 | 0 | 3 | 0 | 0 | 0 | 3 | 0 | 0 | 3 | 0 |
| Cluster of Cysteine desulfurase, mitochondrial OS=Mus musculus GN=Nfs1 PE=2 SV=2 NFS1_MOUSE               | NFS1_MOUSE        | 50 kDa  | 1 | 0 | 0 | 5 | 0 | 0 | 5 | 5 | 0 | 0 | 5 | 0 | 0 |
| 3-hydroxyisobutyrate dehydrogenase, mitochondrial OS=Mus musculus GN=Hibadh P3HI0H_MOUSE                  | P3HI0H_MOUSE      | 35 kDa  | 1 | 0 | 0 | 5 | 0 | 0 | 5 | 0 | 0 | 5 | 0 | 0 | 5 |
| Growth factor receptor-bound protein 2 OS=Mus musculus GN=Grb2 PE=2 SV=1                                  | B1AT92_MOUSE (+1) | 24 kDa  | 1 | 4 | 3 | 3 | 3 | 4 | 3 | 3 | 3 | 4 | 3 | 3 | 4 |
| Complement factor I OS=Mus musculus GN=Cfi PE=1 SV=3                                                      | CFAI_MOUSE        | 67 kDa  | 1 | 0 | 0 | 4 | 0 | 0 | 4 | 4 | 0 | 0 | 4 | 0 | 0 |
| Cytoskeleton-associated protein 4 OS=Mus musculus GN=Ckap4 PE=2 SV=2                                      | CKAP4_MOUSE       | 64 kDa  | 1 | 0 | 3 | 4 | 3 | 0 | 4 | 4 | 3 | 0 | 4 | 3 | 0 |
| Desmoglein-2 OS=Mus musculus GN=Dsg2 PE=1 SV=3                                                            | DSG2_MOUSE        | 122 kDa | 1 | 0 | 3 | 0 | 3 | 0 | 0 | 0 | 3 | 0 | 0 | 3 | 0 |
| Epoxide hydrolase 1 OS=Mus musculus GN=Ephx1 PE=2 SV=1                                                    | E9PWK1_MOUSE (+1) | 51 kDa  | 1 | 4 | 0 | 0 | 0 | 4 | 0 | 0 | 0 | 4 | 0 | 0 | 4 |
| Eukaryotic translation initiation factor 3 subunit C OS=Mus musculus GN=Eif3c PE=1 S EIF3C_MOUSE          | EIF3C_MOUSE       | 106 kDa | 1 | 0 | 3 | 0 | 3 | 0 | 0 | 0 | 3 | 0 | 0 | 3 | 0 |
| Protein ETHE1, mitochondrial OS=Mus musculus GN=Ethe1 PE=1 SV=2                                           | ETHE1_MOUSE       | 28 kDa  | 1 | 0 | 0 | 3 | 0 | 0 | 3 | 3 | 0 | 0 | 3 | 0 | 0 |
| Eukaryotic translation initiation factor 2 subunit 1 OS=Mus musculus GN=Eif2s1 PE=1 IF2A_MOUSE            | IF2A_MOUSE        | 36 kDa  | 1 | 3 | 3 | 0 | 3 | 3 | 0 | 0 | 3 | 3 | 0 | 3 | 3 |
| Platelet-activating factor acetylhydrolase 1B subunit alpha OS=Mus musculus GN=PafaL1S1_MOUSE             | PafaL1S1_MOUSE    | 47 kDa  | 1 | 0 | 3 | 5 | 3 | 0 | 5 | 5 | 3 | 0 | 5 | 3 | 0 |
| Palladin OS=Mus musculus GN=Palld PE=1 SV=2                                                               | PALLD_MOUSE (+1)  | 152 kDa | 1 | 0 | 0 | 3 | 0 | 0 | 3 | 3 | 0 | 0 | 3 | 0 | 0 |
| Prostaglandin E synthase 2 OS=Mus musculus GN=Ptges2 PE=1 SV=3                                            | PGES2_MOUSE       | 43 kDa  | 1 | 0 | 0 | 4 | 0 | 0 | 4 | 4 | 0 | 0 | 4 | 0 | 0 |
| Cluster of 26S proteasome non-ATPase regulatory subunit 13 OS=Mus musculus GN=PSD13_MOUSE                 | PSD13_MOUSE       | 43 kDa  | 1 | 4 | 5 | 4 | 5 | 4 | 4 | 4 | 5 | 4 | 4 | 5 | 4 |
| Target of Myb protein 1 OS=Mus musculus GN=Tom1 PE=2 SV=1                                                 | Q3UDC3_MOUSE      | 57 kDa  | 1 | 0 | 3 | 0 | 3 | 0 | 0 | 0 | 3 | 0 | 0 | 3 | 0 |
| 60S ribosomal protein L36a OS=Mus musculus GN=Rpl36a PE=2 SV=2                                            | RL36A_MOUSE       | 12 kDa  | 1 | 0 | 3 | 4 | 3 | 0 | 4 | 4 | 3 | 0 | 4 | 3 | 0 |
| Small glutamine-rich tetratricopeptide repeat-containing protein alpha OS=Mus musculus GN=SGTA_MOUSE (+1) | SGTA_MOUSE (+1)   | 34 kDa  | 1 | 0 | 0 | 4 | 0 | 0 | 4 | 4 | 0 | 0 | 4 | 0 | 0 |
| Serine/arginine-rich splicing factor 3 OS=Mus musculus GN=Srsf3 PE=1 SV=1                                 | SRSF3_MOUSE       | 19 kDa  | 1 | 0 | 3 | 4 | 3 | 0 | 4 | 4 | 3 | 0 | 4 | 3 | 0 |

|                                                                                                   |                    |         |   |   |   |   |   |   |   |   |   |   |   |   |   |
|---------------------------------------------------------------------------------------------------|--------------------|---------|---|---|---|---|---|---|---|---|---|---|---|---|---|
| Carbonyl reductase family member 4 OS=Mus musculus GN=Cbr4 PE=2 SV=2                              | CBR4_MOUSE         | 25 kDa  | 1 | 0 | 0 | 3 | 0 | 0 | 3 | 3 | 0 | 0 | 3 | 0 | 0 |
| Epimerase family protein SDR39U1 OS=Mus musculus GN=Sdr39u1 PE=1 SV=1                             | D39U1_MOUSE (+1)   | 33 kDa  | 1 | 0 | 4 | 0 | 4 | 0 | 0 | 0 | 4 | 0 | 0 | 4 | 0 |
| Cluster of 60S ribosomal protein L35 OS=Mus musculus GN=Rpl35 PE=2 SV=1 (RL35_N RL35_MOUSE        |                    | 15 kDa  | 1 | 0 | 0 | 3 | 0 | 0 | 3 | 3 | 0 | 0 | 3 | 0 | 0 |
| Cluster of Heterogeneous nuclear ribonucleoprotein D0 OS=Mus musculus GN=Hnrnp HNRPD_MOUSE [4]    |                    | 38 kDa  | 1 | 0 | 7 | 0 | 7 | 0 | 0 | 0 | 7 | 0 | 0 | 7 | 0 |
| Cluster of SH3 domain-binding glutamic acid-rich protein OS=Mus musculus GN=Sh3b SH3BG_MOUSE      |                    | 23 kDa  | 1 | 0 | 3 | 0 | 3 | 0 | 0 | 0 | 0 | 0 | 0 | 3 | 0 |
| Tyrosine--tRNA ligase, cytoplasmic OS=Mus musculus GN=Yars PE=4 SV=1                              | A2A757_MOUSE (+1)  | 63 kDa  | 1 | 0 | 3 | 4 | 3 | 0 | 4 | 4 | 3 | 0 | 4 | 3 | 0 |
| Annexin A3 OS=Mus musculus GN=Anxa3 PE=1 SV=4                                                     | ANXA3_MOUSE        | 36 kDa  | 1 | 3 | 2 | 2 | 2 | 3 | 2 | 2 | 2 | 3 | 2 | 2 | 3 |
| Protein Gm20547 OS=Mus musculus GN=Gm20547 PE=2 SV=1                                              | B8JJNO_MOUSE (+1)  | 142 kDa | 1 | 5 | 3 | 0 | 3 | 5 | 0 | 0 | 3 | 5 | 0 | 3 | 5 |
| Corticosteroid-binding globulin OS=Mus musculus GN=Serpina6 PE=1 SV=1                             | CBG_MOUSE          | 45 kDa  | 1 | 3 | 0 | 4 | 0 | 3 | 4 | 4 | 0 | 3 | 4 | 0 | 3 |
| Chloride intracellular channel protein 4 OS=Mus musculus GN=Clic4 PE=1 SV=3                       | CLIC4_MOUSE        | 29 kDa  | 1 | 3 | 0 | 0 | 0 | 3 | 0 | 0 | 0 | 3 | 0 | 0 | 3 |
| Glycogen [starch] synthase, muscle OS=Mus musculus GN=Gys1 PE=2 SV=1                              | D3Z0Q6_MOUSE (+1)  | 77 kDa  | 1 | 3 | 2 | 3 | 2 | 3 | 3 | 3 | 2 | 3 | 3 | 2 | 3 |
| Protein Coq10a OS=Mus musculus GN=Coq10a PE=2 SV=1                                                | E9Q3H6_MOUSE       | 29 kDa  | 1 | 0 | 4 | 3 | 4 | 0 | 3 | 3 | 4 | 0 | 3 | 4 | 0 |
| Elongation factor Ts, mitochondrial OS=Mus musculus GN=Tsfm PE=2 SV=1                             | EFTS_MOUSE         | 35 kDa  | 1 | 0 | 4 | 3 | 4 | 0 | 3 | 3 | 4 | 0 | 3 | 4 | 0 |
| RNA-binding protein FUS (Fragment) OS=Mus musculus GN=Fus PE=4 SV=1                               | G3UXT7_MOUSE       | 14 kDa  | 1 | 3 | 4 | 3 | 4 | 3 | 3 | 3 | 4 | 3 | 3 | 4 | 3 |
| Valine--tRNA ligase (Fragment) OS=Mus musculus GN=Vars PE=2 SV=1                                  | G3UY93_MOUSE       | 141 kDa | 1 | 0 | 0 | 3 | 0 | 0 | 3 | 3 | 0 | 0 | 3 | 0 | 0 |
| Inter-alpha trypsin inhibitor, heavy chain 2 OS=Mus musculus GN=Itih2 PE=4 SV=1                   | G3X977_MOUSE (+1)  | 106 kDa | 1 | 0 | 3 | 3 | 3 | 0 | 3 | 3 | 3 | 0 | 3 | 3 | 0 |
| Matrin-3 OS=Mus musculus GN=Matr3 PE=1 SV=1                                                       | MATR3_MOUSE        | 95 kDa  | 1 | 0 | 4 | 0 | 4 | 0 | 0 | 0 | 4 | 0 | 0 | 4 | 0 |
| Ribosylidihydroxynicotinamide dehydrogenase [quinone] OS=Mus musculus GN=Nqo2 P                   | NQO2_MOUSE         | 26 kDa  | 1 | 3 | 3 | 4 | 3 | 3 | 4 | 4 | 3 | 3 | 4 | 3 | 3 |
| Prefoldin subunit 2 OS=Mus musculus GN=Pfdn2 PE=2 SV=2                                            | PF2D2_MOUSE        | 17 kDa  | 1 | 0 | 3 | 0 | 3 | 0 | 0 | 0 | 3 | 0 | 0 | 3 | 0 |
| Proteasome subunit beta type-6 OS=Mus musculus GN=Psm6 PE=1 SV=3                                  | PSB6_MOUSE         | 25 kDa  | 1 | 0 | 3 | 3 | 3 | 0 | 3 | 3 | 0 | 3 | 0 | 3 | 0 |
| Multifunctional protein ADE2 OS=Mus musculus GN=Paics PE=1 SV=4                                   | PUR6_MOUSE         | 47 kDa  | 1 | 0 | 0 | 3 | 0 | 0 | 3 | 3 | 0 | 0 | 3 | 0 | 0 |
| 40S ribosomal protein S21 OS=Mus musculus GN=Rps21 PE=2 SV=1                                      | RS21_MOUSE         | 9 kDa   | 1 | 0 | 3 | 6 | 3 | 0 | 6 | 6 | 3 | 0 | 6 | 3 | 0 |
| 40S ribosomal protein SA OS=Mus musculus GN=Rpsa PE=1 SV=4                                        | RSSA_MOUSE         | 33 kDa  | 1 | 4 | 0 | 0 | 0 | 4 | 0 | 0 | 0 | 4 | 0 | 0 | 4 |
| NAD-dependent protein deacetylase sirtuin-5, mitochondrial OS=Mus musculus GN=Sirt5               | SIRT5_MOUSE        | 34 kDa  | 1 | 4 | 0 | 0 | 0 | 4 | 0 | 0 | 0 | 4 | 0 | 0 | 4 |
| T-complex protein 1 subunit gamma OS=Mus musculus GN=Cct3 PE=1 SV=1                               | TCPG_MOUSE         | 61 kDa  | 1 | 4 | 4 | 3 | 4 | 4 | 0 | 4 | 3 | 4 | 4 | 3 | 4 |
| Hematological and neurological expressed 1 protein OS=Mus musculus GN=Hn1 PE=1                    | HN1_MOUSE          | 16 kDa  | 1 | 0 | 0 | 3 | 0 | 0 | 3 | 3 | 0 | 0 | 3 | 0 | 0 |
| 28S ribosomal protein S5, mitochondrial OS=Mus musculus GN=Mrps5 PE=2 SV=1                        | RT05_MOUSE         | 48 kDa  | 1 | 0 | 3 | 0 | 3 | 0 | 0 | 0 | 3 | 0 | 0 | 3 | 0 |
| Adrenodoxin, mitochondrial OS=Mus musculus GN=Fdx1 PE=2 SV=1                                      | ADX_MOUSE          | 20 kDa  | 1 | 3 | 0 | 0 | 0 | 3 | 0 | 0 | 0 | 3 | 0 | 0 | 3 |
| Protein 1300017J02Rik OS=Mus musculus GN=1300017J02Rik PE=2 SV=1                                  | D3Y36_MOUSE (+1)   | 69 kDa  | 1 | 0 | 3 | 0 | 3 | 0 | 0 | 0 | 3 | 0 | 0 | 3 | 0 |
| Cluster of Dynein light chain 2, cytoplasmic OS=Mus musculus GN=Dynll2 PE=1 SV=1 ( DYL2_MOUSE [2] |                    | 10 kDa  | 1 | 0 | 5 | 0 | 5 | 0 | 0 | 0 | 5 | 0 | 0 | 5 | 0 |
| Cluster of Mitochondrial import inner membrane translocase subunit Tim8 A OS=Mus musculus         | MM8_MOUSE          | 11 kDa  | 1 | 3 | 0 | 0 | 0 | 3 | 0 | 0 | 0 | 3 | 0 | 0 | 3 |
| Cytoplasmic dynein 1 intermediate chain 2 OS=Mus musculus GN=Dync1i2 PE=2 SV=1 A2BFF5_MOUSE (+4)  |                    | 71 kDa  | 1 | 0 | 0 | 3 | 0 | 0 | 3 | 3 | 0 | 0 | 3 | 0 | 0 |
| Flavin reductase (NADPH) OS=Mus musculus GN=Blvrb PE=2 SV=3                                       | BLVRB_MOUSE        | 22 kDa  | 1 | 0 | 4 | 3 | 4 | 0 | 3 | 3 | 4 | 0 | 3 | 4 | 0 |
| Adenylyl cyclase-associated protein 1 OS=Mus musculus GN=Cap1 PE=1 SV=4                           | CAP1_MOUSE         | 52 kDa  | 1 | 0 | 5 | 3 | 5 | 0 | 3 | 3 | 5 | 0 | 3 | 5 | 0 |
| Enoyl-CoA hydratase domain-containing protein 2, mitochondrial (Fragment) OS=Mus musculus         | F6Z5N5_MOUSE (+1)  | 13 kDa  | 1 | 0 | 0 | 4 | 0 | 0 | 4 | 4 | 0 | 4 | 0 | 4 | 0 |
| High mobility group protein B2 OS=Mus musculus GN=Hmgb2 PE=1 SV=3                                 | HMG2_MOUSE         | 24 kDa  | 1 | 0 | 4 | 0 | 4 | 0 | 0 | 0 | 4 | 0 | 0 | 4 | 0 |
| Heat shock protein 105 kDa OS=Mus musculus GN=Hsph1 PE=1 SV=2                                     | HS105_MOUSE (+1)   | 96 kDa  | 1 | 0 | 3 | 0 | 3 | 0 | 0 | 0 | 3 | 0 | 0 | 3 | 0 |
| Importin subunit beta-1 OS=Mus musculus GN=Kpnb1 PE=1 SV=2                                        | IMB1_MOUSE         | 97 kDa  | 1 | 0 | 5 | 4 | 5 | 0 | 4 | 4 | 5 | 0 | 4 | 5 | 0 |
| Cob(II)yrinic acid a,c-diamide adenosyltransferase, mitochondrial OS=Mus musculus G               | MMAB_MOUSE         | 26 kDa  | 1 | 0 | 4 | 0 | 0 | 4 | 0 | 4 | 0 | 0 | 4 | 0 | 0 |
| Non-POU domain-containing octamer-binding protein OS=Mus musculus GN=Nono P                       | NONO_MOUSE         | 55 kDa  | 1 | 2 | 0 | 0 | 0 | 2 | 0 | 0 | 0 | 2 | 0 | 0 | 2 |
| Nucleosome assembly protein 1-like 4 OS=Mus musculus GN=Nap1l4 PE=1 SV=1                          | NP1L4_MOUSE        | 43 kDa  | 1 | 2 | 4 | 0 | 4 | 2 | 0 | 0 | 4 | 2 | 0 | 4 | 2 |
| Nuclear migration protein nudC OS=Mus musculus GN=Nudc PE=1 SV=1                                  | NUDC_MOUSE         | 38 kDa  | 1 | 0 | 0 | 3 | 0 | 0 | 3 | 3 | 0 | 0 | 3 | 0 | 0 |
| Obg-like ATPase 1 OS=Mus musculus GN=Ola1 PE=1 SV=1                                               | OLA1_MOUSE         | 45 kDa  | 1 | 0 | 6 | 3 | 6 | 0 | 3 | 3 | 6 | 0 | 3 | 6 | 0 |
| Heterogeneous nuclear ribonucleoprotein H OS=Mus musculus GN=Hnrnp1 PE=2 SV                       | Q8C2Q7_MOUSE       | 51 kDa  | 1 | 4 | 3 | 1 | 3 | 4 | 1 | 1 | 3 | 4 | 1 | 3 | 4 |
| 40S ribosomal protein S20 OS=Mus musculus GN=Rps20 PE=1 SV=1                                      | RS20_MOUSE         | 13 kDa  | 1 | 4 | 0 | 0 | 0 | 4 | 0 | 0 | 0 | 4 | 0 | 0 | 4 |
| Actin-related protein 2 OS=Mus musculus GN=Actr2 PE=1 SV=1                                        | ARP2_MOUSE         | 45 kDa  | 1 | 0 | 3 | 0 | 3 | 0 | 0 | 0 | 3 | 0 | 0 | 3 | 0 |
| LIM and senescent cell antigen-like-containing domain protein 1 OS=Mus musculus G                 | IE9QP62_MOUSE (+1) | 44 kDa  | 1 | 0 | 2 | 0 | 2 | 0 | 0 | 0 | 2 | 0 | 0 | 2 | 0 |
| Cluster of ATP-dependent RNA helicase DDX3X OS=Mus musculus GN=Ddx3x PE=1 SV                      | DDX3X_MOUSE        | 73 kDa  | 1 | 2 | 5 | 0 | 5 | 2 | 0 | 0 | 5 | 2 | 0 | 5 | 2 |
| Cluster of Mitochondrial calcium uniporter regulator 1 OS=Mus musculus GN=Ccdc90                  | MCUR1_MOUSE        | 38 kDa  | 1 | 0 | 3 | 0 | 3 | 0 | 0 | 0 | 3 | 0 | 0 | 3 | 0 |
| Cluster of Ras-related protein Rap-1b OS=Mus musculus GN=Rap1b PE=2 SV=2 (RAP1                    | RAP1B_MOUSE [2]    | 21 kDa  | 1 | 0 | 0 | 4 | 0 | 0 | 4 | 4 | 0 | 0 | 4 | 0 | 0 |
| Cluster of Serine/arginine-rich-splicing factor 4 OS=Mus musculus GN=Srsf4 PE=2 SV                | A2A837_MOUSE       | 56 kDa  | 1 | 0 | 0 | 1 | 0 | 0 | 0 | 0 | 0 | 1 | 0 | 0 | 0 |
| ATP-binding cassette sub-family B member 7, mitochondrial OS=Mus musculus GN=A                    | ABC7_MOUSE         | 83 kDa  | 1 | 0 | 0 | 3 | 0 | 0 | 3 | 3 | 0 | 0 | 3 | 0 | 0 |
| CDGSH iron sulfur domain 3 OS=Mus musculus GN=Cisd3 PE=2 SV=1                                     | B2RWE3_MOUSE (+1)  | 15 kDa  | 1 | 0 | 4 | 0 | 4 | 0 | 0 | 0 | 4 | 0 | 0 | 4 | 0 |
| Calpain-1 catalytic subunit OS=Mus musculus GN=Capn1 PE=2 SV=1                                    | CAN1_MOUSE         | 82 kDa  | 1 | 0 | 0 | 3 | 0 | 0 | 3 | 3 | 0 | 0 | 3 | 0 | 0 |
| Coatomer subunit delta OS=Mus musculus GN=Arccn1 PE=2 SV=2                                        | COPD_MOUSE         | 57 kDa  | 1 | 0 | 3 | 0 | 3 | 0 | 0 | 0 | 3 | 0 | 0 | 3 | 0 |
| Endothelial differentiation-related factor 1 OS=Mus musculus GN=Edf1 PE=1 SV=1                    | EDF1_MOUSE         | 16 kDa  | 1 | 0 | 3 | 0 | 3 | 0 | 0 | 0 | 3 | 0 | 0 | 3 | 0 |
| Protein-cysteine N-palmitoyltransferase HHAT-like protein OS=Mus musculus GN=Hh                   | HHAT_MOUSE         | 56 kDa  | 1 | 3 | 0 | 6 | 0 | 3 | 6 | 6 | 0 | 3 | 6 | 0 | 3 |
| Ig gamma-3 chain C region OS=Mus musculus PE=1 SV=2                                               | IHG3_MOUSE         | 44 kDa  | 1 | 0 | 0 | 3 | 0 | 0 | 3 | 3 | 0 | 0 | 3 | 0 | 0 |
| LYR motif-containing protein 4 OS=Mus musculus GN=Lyrm4 PE=2 SV=1                                 | LYRM4_MOUSE        | 11 kDa  | 1 | 3 | 3 | 0 | 3 | 3 | 0 | 0 | 3 | 3 | 0 | 3 | 3 |
| NFU1 iron-sulfur cluster scaffold homolog, mitochondrial OS=Mus musculus GN=Nfu1                  | NFU1_MOUSE         | 29 kDa  | 1 | 0 | 3 | 4 | 3 | 0 | 4 | 4 | 3 | 0 | 4 | 3 | 0 |
| 1-acyl-sn-glycerol-3-phosphate acyltransferase gamma OS=Mus musculus GN=Agpat3                    | PLCC_MOUSE         | 43 kDa  | 1 | 0 | 3 | 3 | 3 | 0 | 3 | 3 | 3 | 0 | 3 | 3 | 0 |
| Proteasome subunit alpha type-3 OS=Mus musculus GN=Psm3 PE=1 SV=3                                 | PSA3_MOUSE         | 28 kDa  | 1 | 0 | 3 | 3 | 3 | 0 | 3 | 3 | 3 | 0 | 3 | 3 | 0 |
| 28S ribosomal protein S31, mitochondrial OS=Mus musculus GN=Mrps31 PE=2 SV=1                      | RT31_MOUSE         | 44 kDa  | 1 | 0 | 0 | 3 | 0 | 0 | 3 | 3 | 0 | 0 | 3 | 0 | 0 |
| tRNA-splicing ligase RtcB homolog OS=Mus musculus GN=D10Wsu52e PE=2 SV=1                          | RTCB_MOUSE         | 55 kDa  | 1 | 0 | 3 | 0 | 3 | 0 | 0 | 0 | 3 | 0 | 0 | 3 | 0 |
| Selenoprotein P OS=Mus musculus GN=Sepp1 PE=2 SV=3                                                | SEPP1_MOUSE        | 43 kDa  | 1 | 0 | 4 | 0 | 4 | 0 | 0 | 0 | 4 | 0 | 0 | 4 | 0 |
| PDZ and LIM domain protein 1 OS=Mus musculus GN=Pdlim1 PE=2 SV=4                                  | PDL1_MOUSE         | 36 kDa  | 1 | 3 | 0 | 0 | 0 | 3 | 0 | 0 | 0 | 3 | 0 | 0 | 3 |

|                                                                                                         |                         |         |   |   |   |   |   |   |   |   |   |   |   |   |   |
|---------------------------------------------------------------------------------------------------------|-------------------------|---------|---|---|---|---|---|---|---|---|---|---|---|---|---|
| Transmembrane protein 65 OS=Mus musculus GN=Tmem65 PE=2 SV=1                                            | TMM65_MOUSE             | 25 kDa  | 1 | 4 | 0 | 0 | 0 | 4 | 0 | 0 | 0 | 4 | 0 | 0 | 4 |
| Protein S100-A13 OS=Mus musculus GN=S100a13 PE=1 SV=1                                                   | S10AD_MOUSE             | 11 kDa  | 1 | 0 | 0 | 4 | 0 | 0 | 4 | 4 | 0 | 0 | 4 | 0 | 0 |
| Cluster of Cytochrome b5 OS=Mus musculus GN=Cyb5a PE=1 SV=2 (CYB5_MOUSE)                                | CYB5_MOUSE [2]          | 15 kDa  | 1 | 4 | 0 | 0 | 0 | 4 | 0 | 0 | 0 | 4 | 0 | 0 | 4 |
| Ig gamma-2A chain C region secreted form OS=Mus musculus PE=1 SV=1                                      | GCA8_MOUSE              | 37 kDa  | 1 | 0 | 3 | 0 | 3 | 0 | 0 | 0 | 3 | 0 | 0 | 3 | 0 |
| Arginine-tRNA ligase, cytoplasmic OS=Mus musculus GN=Rars PE=2 SV=2                                     | SYRC_MOUSE              | 76 kDa  | 1 | 0 | 0 | 2 | 0 | 0 | 2 | 2 | 0 | 0 | 2 | 0 | 0 |
| Isoform 2 of Hepatoma-derived growth factor-related protein 3 OS=Mus musculus Ghs p Q9JMG7-2 HDGR3_MOI? |                         |         | 1 | 0 | 0 | 2 | 0 | 0 | 0 | 0 | 2 | 0 | 0 | 2 | 0 |
| Cluster of Ribose-phosphate pyrophosphokinase OS=Mus musculus GN=Prps13 PE=2 G3UXL2_MOUSE [2]           |                         | 35 kDa  | 1 | 0 | 3 | 0 | 3 | 0 | 0 | 0 | 3 | 0 | 0 | 3 | 0 |
| Cluster of Charged multivesicular body protein 4b OS=Mus musculus GN=Chmp4b PE=CHM4B_MOUSE              |                         | 25 kDa  | 1 | 0 | 0 | 3 | 0 | 0 | 0 | 0 | 3 | 0 | 0 | 3 | 0 |
| Cluster of Oxysterol-binding protein 1 OS=Mus musculus GN=Osbp PE=1 SV=3 (OSBP1_OSBP1_MOUSE)            |                         | 89 kDa  | 1 | 0 | 0 | 4 | 0 | 4 | 0 | 4 | 0 | 4 | 0 | 4 | 0 |
| Cytosolic 5'-nucleotidase 3 OS=Mus musculus GN=Nt5c3 PE=1 SV=4                                          | SNT3_MOUSE              | 37 kDa  | 1 | 3 | 3 | 0 | 3 | 3 | 0 | 0 | 3 | 3 | 0 | 3 | 3 |
| Actin-related protein 3 OS=Mus musculus GN=Actr3 PE=1 SV=3                                              | ARP3_MOUSE              | 47 kDa  | 1 | 0 | 0 | 3 | 0 | 0 | 3 | 3 | 0 | 0 | 3 | 0 | 0 |
| Carbonic anhydrase 1 OS=Mus musculus GN=Ca1 PE=2 SV=4                                                   | CAH1_MOUSE              | 28 kDa  | 1 | 0 | 3 | 3 | 3 | 0 | 3 | 3 | 3 | 0 | 3 | 3 | 0 |
| Cell division control protein 42 homolog OS=Mus musculus GN=Cdc42 PE=1 SV=2                             | CDC42_MOUSE             | 21 kDa  | 1 | 3 | 0 | 0 | 0 | 3 | 0 | 0 | 0 | 3 | 0 | 0 | 3 |
| Coiled-coil-helix-coiled-coil-helix domain-containing protein 6, mitochondrial OS=Mus CHCH6_MOUSE (+1)  |                         | 30 kDa  | 1 | 4 | 0 | 0 | 0 | 4 | 0 | 0 | 0 | 4 | 0 | 0 | 4 |
| MCG148436 OS=Mus musculus GN=1700014D04Rik PE=4 SV=1                                                    | J3QMS2_MOUSE            | 109 kDa | 1 | 3 | 0 | 0 | 0 | 3 | 0 | 0 | 0 | 3 | 0 | 0 | 3 |
| Mitochondrial intermediate peptidase OS=Mus musculus GN=Mipep PE=2 SV=1                                 | MPEP_MOUSE              | 81 kDa  | 1 | 3 | 0 | 0 | 0 | 3 | 0 | 0 | 0 | 3 | 0 | 0 | 3 |
| Methionine-R-sulfoxide reductase B3, mitochondrial OS=Mus musculus GN=MsrB3 PE=MSRB3_MOUSE              |                         | 27 kDa  | 1 | 0 | 3 | 3 | 3 | 0 | 3 | 3 | 3 | 0 | 3 | 3 | 0 |
| Omega-amidase NIT2 OS=Mus musculus GN=Nit2 PE=1 SV=1                                                    | NIT2_MOUSE              | 31 kDa  | 1 | 0 | 3 | 0 | 3 | 0 | 0 | 0 | 3 | 0 | 0 | 3 | 0 |
| 26S proteasome non-ATPase regulatory subunit 6 OS=Mus musculus GN=Psm6d PE=1 PSM6D_MOUSE                |                         | 46 kDa  | 1 | 3 | 0 | 0 | 0 | 3 | 0 | 0 | 0 | 3 | 0 | 0 | 3 |
| Tyrosine-protein phosphatase non-receptor type 11 OS=Mus musculus GN=Ptpn11 PE=PTN11_MOUSE (+1)         |                         | 68 kDa  | 1 | 0 | 0 | 4 | 0 | 0 | 4 | 0 | 0 | 4 | 0 | 0 | 0 |
| Ribosome maturation protein SBDS OS=Mus musculus GN=Sbds PE=1 SV=4                                      | SBDS_MOUSE              | 29 kDa  | 1 | 0 | 0 | 3 | 0 | 0 | 3 | 3 | 0 | 0 | 3 | 0 | 0 |
| Ubiquitin carboxyl-terminal hydrolase isozyme L3 OS=Mus musculus GN=Uchl3 PE=1 UCHL3_MOUSE              |                         | 26 kDa  | 1 | 3 | 0 | 0 | 0 | 3 | 0 | 0 | 0 | 3 | 0 | 0 | 3 |
| Isoform 2 of Protein CDV3 OS=Mus musculus GN=Cdv3                                                       | sp Q4VAA2-2 CDV3_MOUSE? |         | 1 | 0 | 0 | 4 | 0 | 0 | 4 | 4 | 0 | 0 | 4 | 0 | 0 |
| Acyl-CoA synthetase family member 2, mitochondrial OS=Mus musculus GN=Acsf2 PE=ACSF2_MOUSE              |                         | 68 kDa  | 1 | 0 | 3 | 0 | 3 | 0 | 0 | 0 | 3 | 0 | 0 | 3 | 0 |
| Echinoderm microtubule-associated protein-like 1 OS=Mus musculus GN=Em11 PE=2 EMAL1_MOUSE               |                         | 90 kDa  | 1 | 0 | 0 | 3 | 0 | 0 | 3 | 0 | 0 | 3 | 0 | 0 | 0 |
| von Willebrand factor A domain-containing protein 5A OS=Mus musculus GN=Vwa5a VMA5A_MOUSE               |                         | 87 kDa  | 1 | 3 | 3 | 0 | 3 | 3 | 0 | 0 | 3 | 3 | 0 | 3 | 3 |
| Heterogeneous nuclear ribonucleoprotein Q OS=Mus musculus GN=Syncrip PE=2 SV=2 G3UZJ2_MOUSE             |                         | 59 kDa  | 1 | 0 | 1 | 0 | 1 | 0 | 0 | 0 | 1 | 0 | 0 | 1 | 0 |
| Neurofilament heavy polypeptide OS=Mus musculus GN=Nefh PE=1 SV=3                                       | NFH_MOUSE               | 117 kDa | 1 | 0 | 0 | 0 | 0 | 1 | 0 | 0 | 0 | 1 | 0 | 0 | 1 |
| Cluster of Annexin A1 OS=Mus musculus GN=Anxa1 PE=1 SV=2 (ANXA1_MOUSE)                                  | ANXA1_MOUSE             | 39 kDa  | 1 | 0 | 2 | 4 | 2 | 0 | 4 | 4 | 2 | 0 | 4 | 2 | 0 |
| Cluster of Serine (Or cysteine) peptidase inhibitor, clade A, member 3N, isoform CRA_ G3X8T9_MOUSE [2]  |                         | 47 kDa  | 1 | 1 | 0 | 0 | 0 | 1 | 0 | 0 | 0 | 1 | 0 | 0 | 1 |
| ATP-dependent RNA helicase DDX1 OS=Mus musculus GN=Ddx1 PE=1 SV=1                                       | DDX1_MOUSE              | 83 kDa  | 1 | 0 | 3 | 0 | 3 | 0 | 0 | 0 | 3 | 0 | 0 | 3 | 0 |
| NADH-cytochrome b5 reductase 3 OS=Mus musculus GN=Cyb5r3 PE=2 SV=1                                      | F2Z456_MOUSE (+1)       | 35 kDa  | 1 | 0 | 0 | 3 | 0 | 0 | 3 | 3 | 0 | 0 | 3 | 0 | 0 |
| Mitochondrial glutamate carrier 1 OS=Mus musculus GN=Slc25a22 PE=1 SV=1                                 | GHC1_MOUSE              | 35 kDa  | 1 | 0 | 0 | 3 | 0 | 0 | 3 | 3 | 0 | 0 | 3 | 0 | 0 |
| Glutaredoxin-related protein 5, mitochondrial OS=Mus musculus GN=Glrx5 PE=2 SV=2 GLRX5_MOUSE            |                         | 16 kDa  | 1 | 0 | 0 | 3 | 0 | 0 | 3 | 3 | 0 | 0 | 3 | 0 | 0 |
| Homeodomain-only protein OS=Mus musculus GN=Hopx PE=1 SV=1                                              | HOP_MOUSE               | 8 kDa   | 1 | 3 | 0 | 0 | 0 | 3 | 0 | 0 | 0 | 3 | 0 | 0 | 3 |
| Probable D-lactate dehydrogenase, mitochondrial OS=Mus musculus GN=Ldhd PE=1 SLDHD_MOUSE                |                         | 52 kDa  | 1 | 0 | 5 | 0 | 5 | 0 | 0 | 0 | 5 | 0 | 0 | 5 | 0 |
| Trans-2-enoyl-CoA reductase, mitochondrial OS=Mus musculus GN=Mecr PE=2 SV=2 MECR_MOUSE                 |                         | 40 kDa  | 1 | 0 | 4 | 3 | 4 | 0 | 3 | 3 | 4 | 0 | 3 | 4 | 0 |
| Nucleobindin-1 OS=Mus musculus GN=Nucb1 PE=1 SV=2                                                       | NUCB1_MOUSE             | 53 kDa  | 1 | 0 | 0 | 3 | 0 | 0 | 3 | 3 | 0 | 0 | 3 | 0 | 0 |
| Dolichyl-diphosphooligosaccharide--protein glycosyltransferase 48 kDa subunit OS=M OST48_MOUSE          |                         | 49 kDa  | 1 | 0 | 0 | 4 | 0 | 0 | 4 | 4 | 0 | 0 | 4 | 0 | 0 |
| Protein kinase C and casein kinase II substrate protein 3 OS=Mus musculus GN=Pacsin3 PACN3_MOUSE        |                         | 49 kDa  | 1 | 0 | 0 | 3 | 0 | 0 | 3 | 3 | 0 | 0 | 3 | 0 | 0 |
| Proteasome subunit beta type-7 OS=Mus musculus GN=Psmb7 PE=1 SV=1                                       | PSB7_MOUSE              | 30 kDa  | 1 | 3 | 0 | 0 | 0 | 3 | 0 | 0 | 0 | 3 | 0 | 0 | 3 |
| Serum albumin OS=Bos taurus GN=ALB PE=1 SV=4                                                            | ALBU_BOVIN              | 69 kDa  | 1 | 2 | 2 | 1 | 2 | 2 | 1 | 1 | 2 | 2 | 1 | 2 | 2 |
| Major vault protein OS=Mus musculus GN=Mvp PE=2 SV=1                                                    | E9Q3X0_MOUSE (+1)       | 97 kDa  | 1 | 0 | 3 | 0 | 3 | 0 | 0 | 0 | 3 | 0 | 0 | 3 | 0 |
| GMP reductase 1 OS=Mus musculus GN=Gmpr PE=2 SV=1                                                       | GMPR1_MOUSE             | 37 kDa  | 1 | 0 | 3 | 4 | 3 | 0 | 4 | 4 | 3 | 0 | 4 | 3 | 0 |
| LDLR chaperone MESD OS=Mus musculus GN=Mesdc2 PE=1 SV=1                                                 | MESD_MOUSE              | 25 kDa  | 1 | 0 | 0 | 3 | 0 | 0 | 3 | 3 | 0 | 0 | 3 | 0 | 0 |
| Delta-sarcoglycan OS=Mus musculus GN=Sgcd PE=1 SV=1                                                     | SGCD_MOUSE              | 32 kDa  | 1 | 0 | 3 | 0 | 3 | 0 | 0 | 0 | 3 | 0 | 0 | 3 | 0 |
| Translocase of inner mitochondrial membrane domain-containing protein 1 OS=Mus r TIDC1_MOUSE            |                         | 32 kDa  | 1 | 0 | 3 | 0 | 3 | 0 | 0 | 0 | 3 | 0 | 0 | 3 | 0 |
| Sorting nexin-12 OS=Mus musculus GN=Snx12 PE=2 SV=1                                                     | SNX12_MOUSE             | 19 kDa  | 1 | 0 | 2 | 2 | 2 | 0 | 2 | 2 | 2 | 0 | 2 | 2 | 0 |
| Heterogeneous nuclear ribonucleoprotein R OS=Mus musculus GN=Hnrnpr PE=2 SV=1 Q8VHM5_MOUSE              |                         | 71 kDa  | 1 | 0 | 1 | 0 | 1 | 0 | 0 | 0 | 1 | 0 | 0 | 1 | 0 |
| Cluster of Muscleblind-like 1 (Drosophila), isoform CRA_a OS=Mus musculus GN=Mbn G3X9Q0_MOUSE [6]       |                         | 41 kDa  | 1 | 3 | 0 | 0 | 0 | 3 | 0 | 0 | 0 | 3 | 0 | 0 | 3 |
| Cluster of Histone-binding protein RBBP7 OS=Mus musculus GN=Rbbp7 PE=2 SV=1 (A: A2AFI9_MOUSE [3])       |                         | 44 kDa  | 1 | 0 | 0 | 3 | 0 | 0 | 3 | 3 | 0 | 0 | 3 | 0 | 0 |
| Cluster of Histone H2A.Z OS=Mus musculus GN=H2afz PE=1 SV=2 (H2AZ_MOUSE)                                | H2AZ_MOUSE              | 14 kDa  | 1 | 1 | 2 | 3 | 2 | 1 | 3 | 3 | 2 | 1 | 3 | 2 | 1 |
| Cluster of Dihydropyrimidinase-related protein 3 OS=Mus musculus GN=Dpysl3 PE=2 E9PWE8_MOUSE            |                         | 74 kDa  | 1 | 0 | 0 | 2 | 0 | 0 | 2 | 2 | 0 | 0 | 2 | 0 | 0 |
| Coiled-coil domain-containing protein 90B, mitochondrial OS=Mus musculus GN=Ccdc CC90B_MOUSE            |                         | 30 kDa  | 1 | 0 | 0 | 3 | 0 | 0 | 3 | 3 | 0 | 0 | 3 | 0 | 0 |
| Gap junction alpha-1 protein OS=Mus musculus GN=Gja1 PE=1 SV=2                                          | CXA1_MOUSE              | 43 kDa  | 1 | 0 | 4 | 0 | 4 | 0 | 0 | 0 | 4 | 0 | 0 | 4 | 0 |
| Vacuolar protein sorting-associated protein 29 OS=Mus musculus GN=Vps29 PE=2 SV=2 D3Z645_MOUSE (+1)     |                         | 16 kDa  | 1 | 0 | 0 | 5 | 0 | 0 | 5 | 5 | 0 | 0 | 5 | 0 | 0 |
| Glucosidase 2 subunit beta OS=Mus musculus GN=Prksh PE=1 SV=1                                           | GLU2B_MOUSE             | 59 kDa  | 1 | 0 | 3 | 0 | 3 | 0 | 0 | 0 | 3 | 0 | 0 | 3 | 0 |
| Complement component 1 Q subcomponent-binding protein, mitochondrial OS=Mus Q8R5L1_MOUSE                |                         | 31 kDa  | 1 | 5 | 0 | 0 | 0 | 5 | 0 | 0 | 0 | 5 | 0 | 0 | 5 |
| UV excision repair protein RAD23 homolog B OS=Mus musculus GN=Rad23b PE=1 SV=1 RD23B_MOUSE              |                         | 44 kDa  | 1 | 3 | 4 | 3 | 4 | 3 | 3 | 3 | 4 | 3 | 3 | 4 | 3 |
| 40S ribosomal protein S23 OS=Mus musculus GN=Rps23 PE=2 SV=3                                            | RS23_MOUSE              | 16 kDa  | 1 | 0 | 0 | 5 | 0 | 0 | 5 | 5 | 0 | 0 | 5 | 0 | 0 |
| Aldehyde dehydrogenase family 8 member A1 OS=Mus musculus GN=Aldh8a1 PE=1 S AL8A1_MOUSE                 |                         | 54 kDa  | 1 | 3 | 0 | 0 | 0 | 3 | 0 | 0 | 0 | 3 | 0 | 0 | 3 |
| Basal cell adhesion molecule OS=Mus musculus GN=Bcam PE=2 SV=1                                          | BCAM_MOUSE              | 68 kDa  | 1 | 0 | 0 | 3 | 0 | 0 | 3 | 3 | 0 | 0 | 3 | 0 | 0 |
| Thioredoxin domain-containing protein 5 OS=Mus musculus GN=Txdnc5 PE=2 SV=1                             | E9PXX7_MOUSE            | 39 kDa  | 1 | 0 | 0 | 4 | 0 | 0 | 4 | 4 | 0 | 0 | 4 | 0 | 0 |
| Prostaglandin synthase OS=Mus musculus GN=Fam213b PE=1 SV=1                                             | PGFS_MOUSE              | 22 kDa  | 1 | 0 | 4 | 4 | 4 | 0 | 4 | 4 | 4 | 0 | 4 | 4 | 0 |
| UV excision repair protein RAD23 homolog A (Fragment) OS=Mus musculus GN=Rad2. Q3TN85_MOUSE (+2)        |                         | 35 kDa  | 1 | 0 | 4 | 3 | 4 | 0 | 3 | 3 | 4 | 0 | 3 | 4 | 0 |
| Protein Taf15 OS=Mus musculus GN=Taf15 PE=2 SV=1                                                        | Q8BQ46_MOUSE            | 59 kDa  | 1 | 0 | 3 | 0 | 3 | 0 | 0 | 0 | 3 | 0 | 0 | 3 | 0 |

|                                                                                                  |                   |         |   |   |   |   |   |   |   |   |   |   |   |   |   |
|--------------------------------------------------------------------------------------------------|-------------------|---------|---|---|---|---|---|---|---|---|---|---|---|---|---|
| Beta-casein OS=Bos taurus GN=CSN2 PE=1 SV=2                                                      | CASB_BOVIN        | 25 kDa  | 1 | 3 | 0 | 0 | 0 | 3 | 0 | 0 | 0 | 3 | 0 | 0 | 3 |
| Histone H1t OS=Mus musculus GN=Hist1h1t PE=1 SV=4                                                | H1T_MOUSE (+1)    | 22 kDa  | 1 | 1 | 0 | 0 | 0 | 1 | 0 | 0 | 0 | 1 | 0 | 0 | 1 |
| 5'-AMP-activated protein kinase catalytic subunit alpha-2 OS=Mus musculus GN=Prka AAPK2_MOUSE    | AAPK2_MOUSE       | 62 kDa  | 1 | 0 | 3 | 0 | 3 | 0 | 0 | 0 | 3 | 0 | 0 | 3 | 0 |
| Heat shock protein beta-2 OS=Mus musculus GN=Hspb2 PE=2 SV=2                                     | HSPB2_MOUSE       | 20 kDa  | 1 | 0 | 3 | 0 | 3 | 0 | 0 | 0 | 3 | 0 | 0 | 3 | 0 |
| Myristoylated alanine-rich C-kinase substrate OS=Mus musculus GN=Marcks PE=1 SV=MARCS_MOUSE      | MARCS_MOUSE       | 30 kDa  | 1 | 0 | 5 | 4 | 5 | 0 | 4 | 4 | 5 | 0 | 4 | 5 | 0 |
| Microtubule-associated protein RP/EB family member 1 OS=Mus musculus GN=Mapr1 MARE1_MOUSE        | MARE1_MOUSE       | 30 kDa  | 1 | 0 | 2 | 3 | 2 | 0 | 3 | 3 | 2 | 0 | 3 | 2 | 0 |
| Proteasome subunit beta type-1 OS=Mus musculus GN=Psb1 PE=1 SV=1                                 | PSB1_MOUSE        | 26 kDa  | 1 | 0 | 3 | 0 | 3 | 0 | 0 | 0 | 3 | 0 | 0 | 3 | 0 |
| Solute carrier family 25 member 46 OS=Mus musculus GN=Slc25a46 PE=1 SV=1                         | S2546_MOUSE       | 46 kDa  | 1 | 0 | 3 | 3 | 3 | 0 | 3 | 3 | 3 | 0 | 3 | 3 | 0 |
| DnaJ homolog subfamily A member 1 OS=Mus musculus GN=Dnaj1 PE=1 SV=1                             | DNJA1_MOUSE       | 45 kDa  | 1 | 0 | 3 | 0 | 3 | 0 | 0 | 0 | 3 | 0 | 0 | 3 | 0 |
| Aspartyl aminopeptidase OS=Mus musculus GN=Dnpep PE=2 SV=2                                       | DNPEP_MOUSE       | 52 kDa  | 1 | 0 | 0 | 3 | 0 | 0 | 3 | 3 | 0 | 0 | 3 | 0 | 0 |
| Dual specificity mitogen-activated protein kinase kinase 1 OS=Mus musculus GN=Map2k1 MP2K1_MOUSE | MP2K1_MOUSE       | 43 kDa  | 1 | 2 | 0 | 0 | 0 | 2 | 0 | 0 | 0 | 2 | 0 | 0 | 2 |
| Aspartyl/asparaginyl beta-hydroxylase OS=Mus musculus GN=Asph PE=2 SV=1                          | A2AL85_MOUSE (+1) | 81 kDa  | 1 | 0 | 0 | 2 | 0 | 2 | 0 | 2 | 0 | 0 | 2 | 0 | 0 |
| Proteasome subunit alpha type-5 OS=Mus musculus GN=Psm5 PE=1 SV=1                                | PSA5_MOUSE        | 26 kDa  | 1 | 3 | 0 | 0 | 0 | 3 | 0 | 0 | 0 | 3 | 0 | 0 | 3 |
| Microtubule-associated protein RP/EB family member 3 OS=Mus musculus GN=Mapr3 MARE3_MOUSE        | MARE3_MOUSE       | 32 kDa  | 1 | 0 | 1 | 1 | 1 | 0 | 1 | 1 | 1 | 0 | 1 | 1 | 0 |
| Monoglyceride lipase OS=Mus musculus GN=Mgll PE=2 SV=1                                           | D3YYS6_MOUSE (+3) | 37 kDa  | 1 | 0 | 3 | 0 | 3 | 0 | 0 | 0 | 3 | 0 | 0 | 3 | 0 |
| Fibroblast growth factor 1 OS=Mus musculus GN=Fgf1 PE=2 SV=1                                     | FGF1_MOUSE        | 17 kDa  | 1 | 0 | 3 | 3 | 3 | 0 | 3 | 3 | 3 | 0 | 3 | 3 | 0 |
| Glycerophosphocholine phosphodiesterase GPCPD1 OS=Mus musculus GN=Gpcpd1 P                       | GPCPD1_MOUSE      | 77 kDa  | 1 | 3 | 0 | 0 | 0 | 3 | 0 | 0 | 0 | 3 | 0 | 0 | 3 |
| Vesicle-associated membrane protein 3 OS=Mus musculus GN=Vamp3 PE=1 SV=1                         | VAMP3_MOUSE       | 11 kDa  | 1 | 0 | 0 | 3 | 0 | 0 | 3 | 3 | 0 | 0 | 3 | 0 | 0 |
| Mitochondrial antiviral-signaling protein OS=Mus musculus GN=Mavs PE=1 SV=1                      | MAVS_MOUSE        | 53 kDa  | 1 | 0 | 3 | 0 | 3 | 0 | 0 | 0 | 3 | 0 | 0 | 3 | 0 |
| Biglycan OS=Mus musculus GN=Bgn PE=2 SV=1                                                        | PGS1_MOUSE        | 42 kDa  | 1 | 0 | 2 | 0 | 2 | 0 | 0 | 0 | 2 | 0 | 0 | 2 | 0 |
| Nitric oxide synthase, inducible OS=Mus musculus GN=Nos2 PE=1 SV=1                               | NOS2_MOUSE        | 131 kDa | 1 | 3 | 0 | 0 | 0 | 3 | 0 | 0 | 0 | 3 | 0 | 0 | 3 |
| Annexin A4 OS=Mus musculus GN=Anxa4 PE=2 SV=4                                                    | ANXA4_MOUSE       | 36 kDa  | 1 | 0 | 2 | 0 | 2 | 0 | 0 | 0 | 2 | 0 | 0 | 2 | 0 |
| F-actin-capping protein subunit alpha-1 OS=Mus musculus GN=Capza1 PE=1 SV=4                      | CAZA1_MOUSE (+1)  | 33 kDa  | 1 | 0 | 2 | 0 | 2 | 0 | 0 | 0 | 2 | 0 | 0 | 2 | 0 |
| Cluster of Mitochondrial-processing peptidase subunit beta OS=Mus musculus GN=Pn MPPB_MOUSE      | MPPB_MOUSE        | 55 kDa  | 1 | 2 | 2 | 2 | 2 | 2 | 2 | 2 | 2 | 2 | 2 | 2 | 2 |
| Protein Gyk OS=Mus musculus GN=Gyk PE=2 SV=1                                                     | B1ASZ3_MOUSE (+1) | 60 kDa  | 1 | 0 | 0 | 3 | 0 | 0 | 3 | 3 | 0 | 0 | 3 | 0 | 0 |
| Alpha-endosulfine OS=Mus musculus GN=Ensa PE=1 SV=1                                              | ENSA_MOUSE (+1)   | 13 kDa  | 1 | 0 | 0 | 4 | 0 | 0 | 4 | 4 | 0 | 0 | 4 | 0 | 0 |
| Mitochondrial import inner membrane translocase subunit Tim8 B OS=Mus musculus                   | TIM8B_MOUSE       | 9 kDa   | 1 | 0 | 3 | 3 | 3 | 0 | 3 | 3 | 3 | 0 | 3 | 3 | 0 |
| Uncharacterized protein C19orf43 homolog OS=Mus musculus PE=2 SV=1                               | CS043_MOUSE       | 18 kDa  | 1 | 0 | 0 | 4 | 0 | 0 | 4 | 4 | 0 | 0 | 4 | 0 | 0 |
| rRNA 2'-O-methyltransferase fibrillar OS=Mus musculus GN=Fbl PE=1 SV=2                           | FBRL_MOUSE        | 34 kDa  | 1 | 2 | 0 | 0 | 0 | 2 | 0 | 0 | 0 | 2 | 0 | 0 | 2 |
| Cluster of Agrin OS=Mus musculus GN=Agrn PE=4 SV=1 (MOQWP1_MOUSE)                                | MOQWP1_MOUSE      | 217 kDa | 1 | 0 | 3 | 0 | 3 | 0 | 0 | 0 | 3 | 0 | 0 | 3 | 0 |
| Limb and neural patterns, isoform CRA_c OS=Mus musculus GN=Lnp PE=4 SV=1                         | A2ASL8_MOUSE (+1) | 42 kDa  | 1 | 3 | 0 | 0 | 0 | 3 | 0 | 0 | 0 | 3 | 0 | 0 | 3 |
| 6-phosphofructokinase, liver type OS=Mus musculus GN=Pfkfb1 PE=1 SV=4                            | K6P1_MOUSE        | 85 kDa  | 1 | 0 | 3 | 1 | 3 | 0 | 1 | 1 | 3 | 0 | 1 | 3 | 0 |
| ATP-dependent (S)-NAD(P)H-hydrate dehydratase OS=Mus musculus GN=Carkd PE=3                      | J3QMM7_MOUSE (+4) | 35 kDa  | 1 | 0 | 3 | 0 | 3 | 0 | 0 | 0 | 3 | 0 | 0 | 3 | 0 |
| 1,4-alpha-glucan-branching enzyme OS=Mus musculus GN=Gbe1 PE=4 SV=2                              | F6ZHD8_MOUSE (+1) | 80 kDa  | 1 | 0 | 4 | 0 | 4 | 0 | 0 | 0 | 4 | 0 | 0 | 4 | 0 |
| Protein unc-45 homolog A (Fragment) OS=Mus musculus GN=Unc45a PE=2 SV=1                          | D3YZN8_MOUSE      | 19 kDa  | 1 | 3 | 0 | 0 | 0 | 3 | 0 | 0 | 0 | 3 | 0 | 0 | 3 |
| sp K22E_HUMAN                                                                                    | sp K22E_HUMAN     | ?       | 1 | 0 | 0 | 0 | 0 | 0 | 0 | 0 | 0 | 0 | 0 | 0 | 0 |
| Uncharacterized protein C1orf170 homolog OS=Mus musculus PE=2 SV=1                               | CA170_MOUSE       | 88 kDa  | 1 | 0 | 0 | 2 | 0 | 0 | 2 | 2 | 0 | 0 | 2 | 0 | 0 |
| F-actin-capping protein subunit alpha-2 OS=Mus musculus GN=Capza2 PE=1 SV=3                      | CAZA2_MOUSE       | 33 kDa  | 1 | 0 | 0 | 2 | 0 | 0 | 2 | 2 | 0 | 0 | 2 | 0 | 0 |
| Crk-like protein OS=Mus musculus GN=Crkl PE=1 SV=2                                               | CRKL_MOUSE        | 34 kDa  | 1 | 0 | 0 | 3 | 0 | 0 | 3 | 3 | 0 | 0 | 3 | 0 | 0 |
| DNA excision repair protein ERCC-6-like OS=Mus musculus GN=Erc6l PE=1 SV=1                       | ERCC6L_MOUSE      | 139 kDa | 1 | 3 | 0 | 0 | 0 | 3 | 0 | 0 | 0 | 3 | 0 | 0 | 3 |
| DNA-binding protein A OS=Mus musculus GN=Csda PE=1 SV=2                                          | DBPA_MOUSE        | 39 kDa  | 1 | 0 | 0 | 2 | 0 | 0 | 2 | 2 | 0 | 0 | 2 | 0 | 0 |
| MCG11326, isoform CRA_b OS=Mus musculus GN=Hnrrnp3 PE=4 SV=1                                     | D3YWT1_MOUSE (+1) | 35 kDa  | 1 | 2 | 0 | 0 | 0 | 2 | 0 | 0 | 0 | 2 | 0 | 0 | 2 |
