# Supplementary material
Source: PubMed Central journal article supplement (PMC4847725)

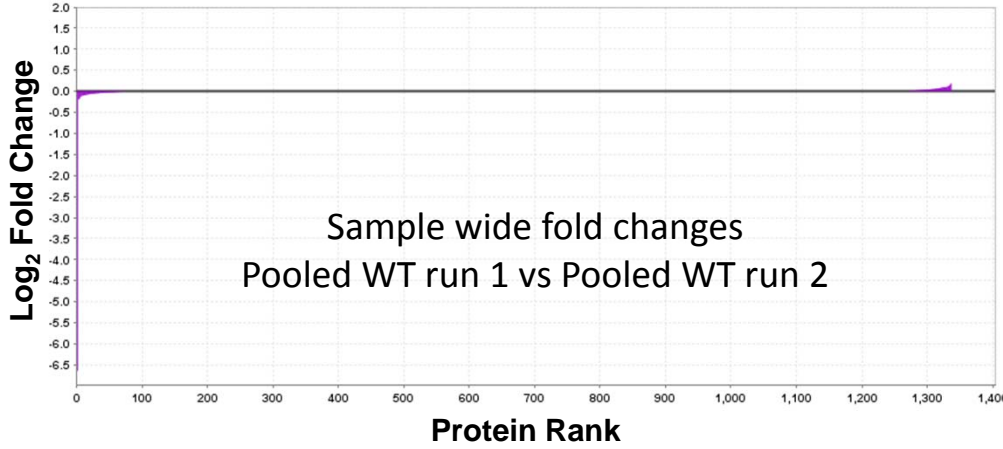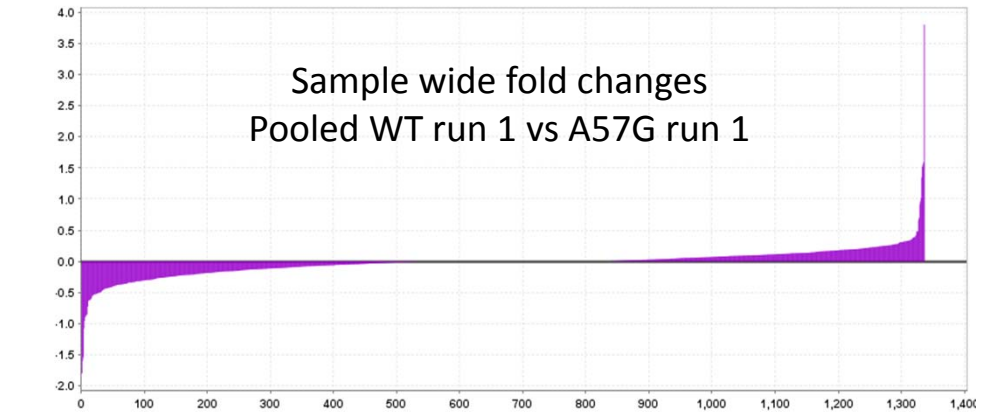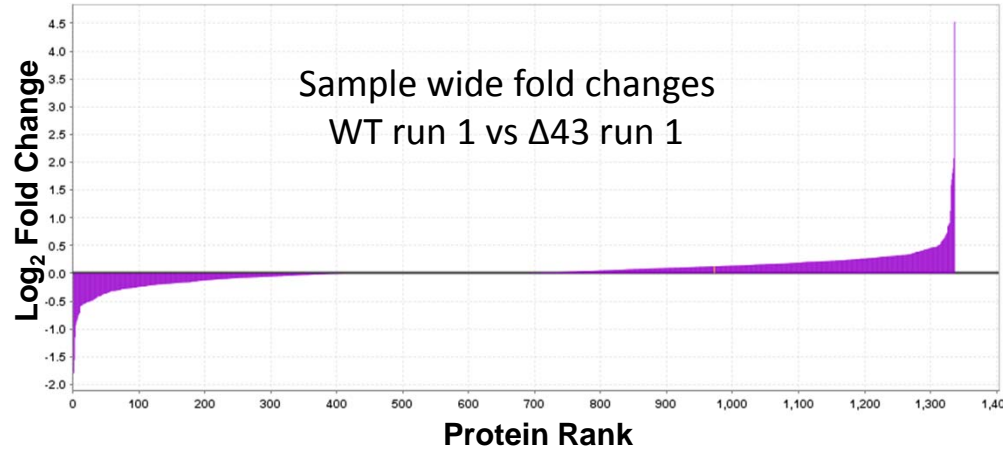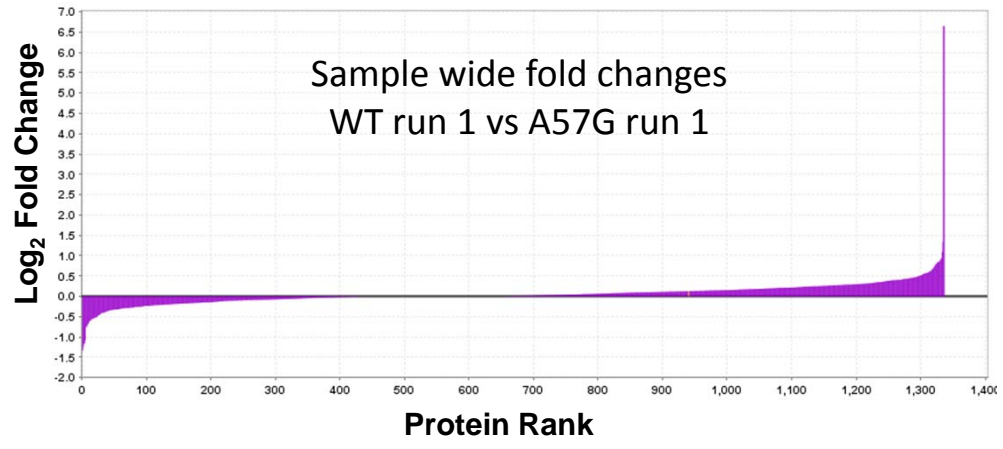

Supplement: NIHMS744867-supplement-10974_2015_9434_MOESM1_ESM.pdf [file NIHMS744867-supplement-10974_2015_9434_MOESM1_ESM.pdf]

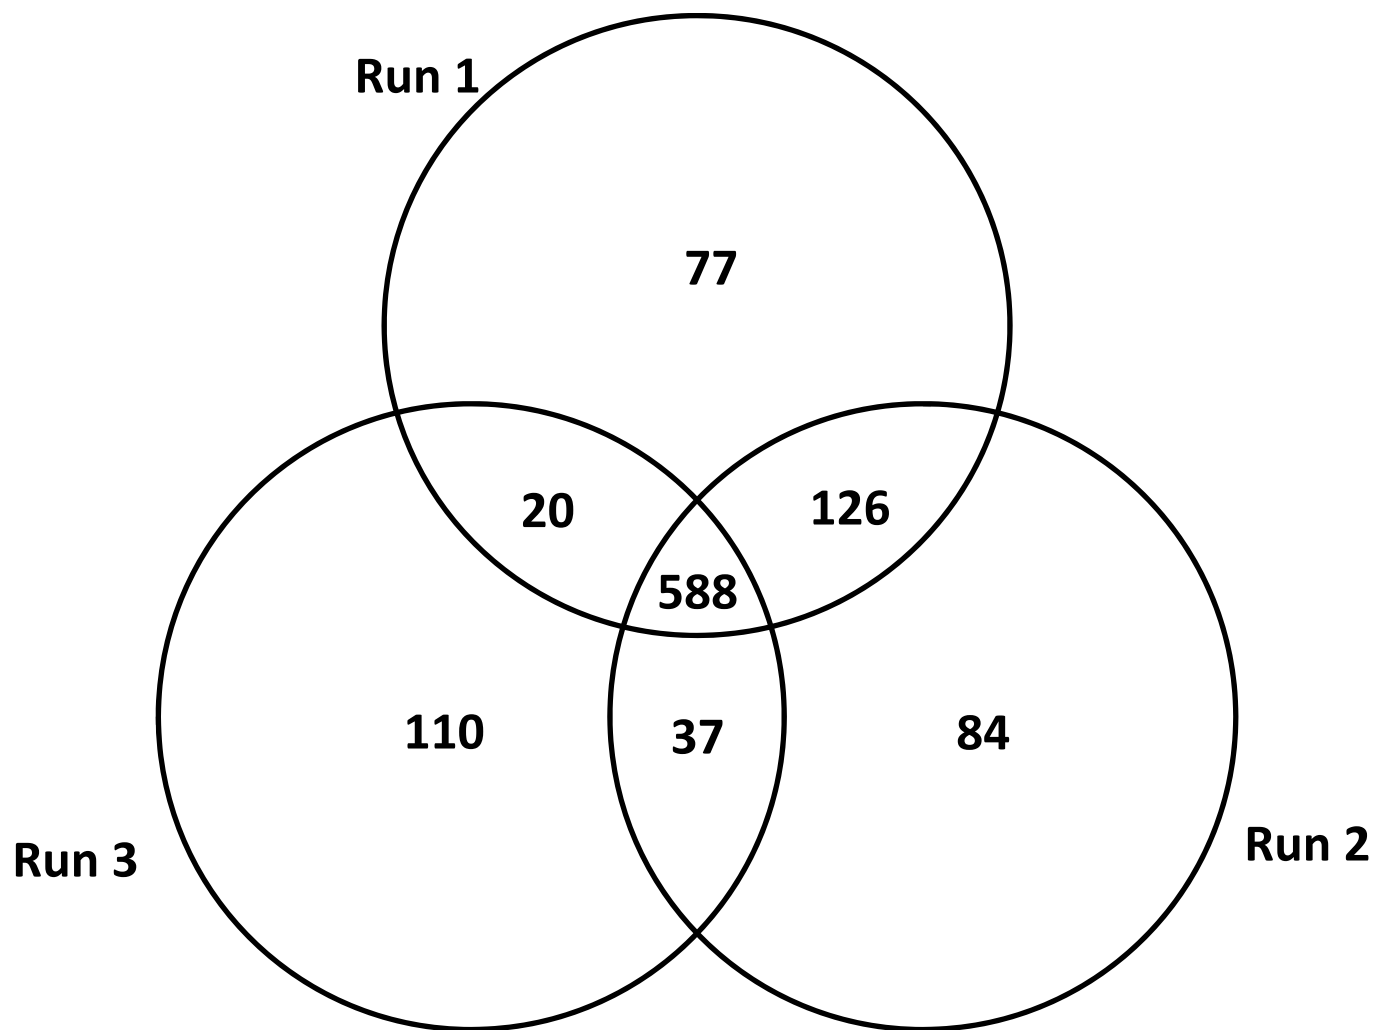

Supplement: NIHMS744867-supplement-10974_2015_9434_MOESM2_ESM.pdf [file NIHMS744867-supplement-10974_2015_9434_MOESM2_ESM.pdf]
